# Supplementary material for: Tissue-specific transcription footprinting using RNA PoI DamID (RAPID) in C. elegans
Source: bioRxiv preprint, doi:10.1101/2020.08.19.257873, version 3 (2020-10-08)
Supplement: Table S4 [file 257873_file16.xlsx]

## Sheet: S1-Raw_data
Supplementary table 4, Sheet 1. Transcribed genes calling from RAPID datasets. Pol II occupancy and FDR are listed.
		Muscle							Intestine								Y cell
name		BC_10				BC_11			BC_05					BC_12			BC_01					BC_04
		polii	gatc.num	FDR		polii	gatc.num	FDR		polii	gatc.num	FDR		polii	gatc.num	FDR		polii	gatc.num	FDR		polii	gatc.num	FDR
WBGene00022277		-0.25102	14	15.6618		-0.298265	14	26.2496		-0.748877	14	202.717		-0.728625	14	295.165		0	14	0.483399		-0.0113444	14	3.96638
WBGene00022276		-0.0895044	12	3.83222		-0.203581	12	7.59669		-0.369352	12	9.08547		-0.0750136	12	1.47658		0.0516005	12	0.331757		-0.0649917	12	4.07631
WBGene00022278		-0.17775	26	52.4181		0.282563	26	0.0257754		-0.302223	26	58.5528		-0.212131	26	26.8198		-0.00869532	26	0.708867		-0.270056	26	280.857
WBGene00022279		-0.14043	17	10.2994		-0.143097	17	8.52773		-0.506273	17	75.2653		-0.16679	17	5.02565		0.278704	17	0.0448554		-0.0484119	17	7.62753
WBGene00022275		-1.09192	7	222.724		-0.106061	7	1.92501		-0.852417	7	26.6564		-1.8758	7	3772.68		-0.204542	7	0.950586		-2.19645	7	3382.97
WBGene00044345		0.0396562	6	1.14207		-0.277889	6	4.29774		-0.933815	6	24.4272		-0.759655	6	15.5477		0	6	0.403825		0.00458539	6	1.33975
WBGene00021677		0.018415	13	2.02252		0.163844	13	0.308793		-0.558408	13	39.4209		-0.397087	13	17.2674		-0.164887	13	1.47293		-0.0203685	13	3.66884
WBGene00021678		0.174127	27	0.766616		0.0970962	27	0.528922		-0.817325	27	46935.6		-0.671234	27	19373.5		-0.129526	27	3.70592		0.0773504	27	8.16526
WBGene00000812		0.062262	20	2.14174		-0.00842691	20	2.1653		-0.398431	20	55.8803		-0.378886	20	69.5029		-0.282906	20	9.85824		0.149216	20	2.28727
WBGene00021683		-0.0430178	30	15.0271		-0.398712	30	5072.71		-0.314909	30	134.337		-0.416122	30	1095.26		-0.0974988	30	2.95467		-0.0470898	30	48.1847
WBGene00021679		0.665684	8	0.0564487		-0.768585	8	148.483		-0.162845	8	1.61965		0.0409991	8	0.611569		1.00628	8	0.00435895		0.103348	8	1.17059
WBGene00021682		0.172644	9	0.668965		-1.22694	9	5753.28		-0.511199	9	10.4733		-0.0174815	9	0.860587		-0.542542	9	6.56294		-1.09098	9	201.086
WBGene00021676		0.655221	12	0.028957		-1.18547	12	35401.3		0.076302	12	0.541999		0.317978	12	0.0968982		-1.6161	12	14908.4		-0.73519	12	145.54
WBGene00189949		0.201903	4	0.579566		-1.40929	4	330.085		-0.730884	4	5.68227		-1.54031	4	81.4558		-0.419662	4	1.1821		-0.4559	4	3.16573
WBGene00021681		0.196012	47	0.577917		0.182095	47	0.0445181		-0.182191	47	143.648		0.0930448	47	0.382609		0.136143	47	0.0451614		0.52019	47	0.0182914
WBGene00004274		0.0636484	6	1.0322		-0.438216	6	10.0454		-0.959398	6	26.9147		-1.31738	6	152.138		-0.556393	6	3.00264		-0.822347	6	17.9285
WBGene00004418		-0.013757	8	1.68347		0.646396	8	0.0173798		-0.564444	8	10.4223		-0.999066	8	115.213		-1.42944	8	280.135		0.0847956	8	1.25772
WBGene00018774		0.0195221	5	1.16102		0.808648	5	0.0202751		-0.894892	5	13.9336		-0.4918	5	3.96238		-1.28847	5	22.457		0.0127536	5	1.1575
WBGene00018773		0.193077	3	0.597038		0.449443	3	0.166071		-0.607898	3	2.95203		-0.0796476	3	0.766092		-0.0178043	3	0.392543		0.714437	3	0.21765
WBGene00000622		-0.75023	7	46.1534		-1.40489	7	3823.11		-0.624603	7	10.2082		-0.80643	7	28.6705		-0.807904	7	11.1154		-1.75084	7	710.148
WBGene00004962		0.0276609	9	1.46101		-0.000836106	9	1.14713		-0.660422	9	22.2791		-0.247828	9	3.06219		-0.222065	9	1.31561		0.244153	9	0.703641
WBGene00003229		-0.208242	19	25.1338		-0.371796	19	190.081		-0.797448	19	1850.96		-0.726332	19	1964.73		-0.172694	19	2.89396		-0.0207514	19	8.16035
WBGene00018772		0.206446	10	0.555016		-0.170679	10	4.30552		-0.109977	10	1.49408		-0.51937	10	18.1764		-0.487183	10	6.39245		0.640829	10	0.117518
WBGene00018771		0.113352	25	1.53047		-0.324942	25	414.917		0.445497	25	0.00722187		-0.062809	25	3.3058		0.314522	25	0.0120292		-0.290205	25	275.089
WBGene00271776		0.209234	5	0.561943		0.0289223	5	0.819527		-0.915757	5	14.9481		-0.519347	5	4.37739		-0.0684291	5	0.489363		0.136316	5	0.821959
WBGene00000253		0.338141	25	0.111829		-0.219606	25	78.8209		-0.357087	25	95.1001		0.218901	25	0.0828128		0.247835	25	0.0277406		1.16029	25	0.00012
WBGene00004225		0.229821	16	0.446501		-0.0934676	16	4.39197		-0.0235346	16	1.22353		0.025939	16	0.8154		0.0531548	16	0.325216		-0.108723	16	9.96293
WBGene00018958		0.480497	10	0.113906		-0.199201	10	5.33251		-0.452869	10	9.78503		-1.17819	10	936.755		0.565604	10	0.0198627		0.983132	10	0.0243203
WBGene00018957		-0.125543	10	3.77977		-1.02699	10	2650.33		-1.01446	10	212.477		-1.08061	10	522.433		-0.396343	10	3.88416		-0.875085	10	125.851
WBGene00018955		0.320173	6	0.350025		0.885625	6	0.00906454		0.473708	6	0.117672		0.891548	6	0.0181553		-0.228871	6	0.921731		-1.54858	6	174.938
WBGene00000227		0.0675024	73	28.3181		-0.00490342	73	30.8955		-0.269843	73	44861.4		-0.409734	73	2.20822e+07		-0.133549	73	197.08		0.0449145	73	1731.51
WBGene00021666		-0.000938156	7	1.46285		0.16912	7	0.385204		-0.00190162	7	0.74051		0.246689	7	0.234649		0.0155662	7	0.387619		-0.071523	7	1.97919
WBGene00021662		0.422328	10	0.159414		1.47549	10	1.87046e-05		0.881194	10	0.00653257		-0.0757848	10	1.27861		-1.85947	10	11866.4		1.42576	10	0.0031719
WBGene00255594		0.144726	5	0.719205		-0.325064	5	4.39482		-0.223639	5	1.45265		-0.545008	5	4.80302		-0.029084	5	0.432556		-0.372993	5	3.37017
WBGene00021672		-0.029167	1	0.985874		-0.0222788	1	0.819973		-0.0297642	1	0.623241		-0.0664207	1	0.642633		-0.170496	1	0.447183		0.357561	1	0.455577
WBGene00021667		0.247039	15	0.396257		-0.711017	15	2238.55		-0.289782	15	8.82708		-0.161483	15	3.79901		-0.94072	15	783.754		0.240779	15	0.891573
WBGene00021675		0.40502	15	0.116808		-0.291206	15	30.2037		-0.000725927	15	0.983018		0.0636179	15	0.579706		0.818169	15	0.000814425		0.0860955	15	2.41185
WBGene00016904		0.00933491	1	0.903638		0.00489916	1	0.765284		0.0222749	1	0.571124		-0.107572	1	0.689816		0	1	0.360888		-0.0414494	1	0.766912
WBGene00016903		-0.0797513	11	3.22928		0.00500834	11	1.20654		-0.373305	11	7.67699		-0.504435	11	21.942		-0.296685	11	2.64363		0.0386738	11	2.09818
WBGene00016905		0	2	0.995846		0	2	0.813222		0	2	0.614439		-0.0138679	2	0.61426		0	2	0.369094		0	2	0.823481
WBGene00016902		-0.0897168	35	49.4079		-0.262841	35	1075.7		-0.982108	35	1.39203e+07		-0.720021	35	801535		-0.297212	35	129.679		0.00542017	35	47.7089
WBGene00016906		0.154894	12	0.771202		0.0486021	12	0.867872		-0.905552	12	270.057		-0.442089	12	18.8012		0.0773086	12	0.281254		-0.680502	12	108.713
WBGene00002077		0.787908	16	0.00479807		0.793809	16	0.000300747		0.00959037	16	0.938199		0.372588	16	0.03826		0.194323	16	0.100729		0.0323891	16	3.81646
WBGene00002079		0.204421	35	0.51037		0.240714	35	0.0238822		0.0491286	35	0.908106		0.224447	35	0.0391998		-0.874144	35	2.68563e+06		0.411184	35	0.179411
WBGene00021660		-0.22761	16	18.3443		-0.0407395	16	2.48415		-0.716069	16	315.171		-0.552822	16	134.781		-0.0018099	16	0.513287		0.00595022	16	4.56814
WBGene00000917		-0.013436	22	5.24561		-0.23564	22	59.4667		-0.102863	22	3.71639		-0.44247	22	225.78		-0.0251469	22	0.765364		0.263995	22	0.937854
WBGene00021661		-0.475559	17	178.61		-0.71373	17	5568.05		-0.749231	17	584.782		-0.699264	17	710.486		-0.610535	17	109.537		-0.0234369	17	6.37758
WBGene00021658		-0.00334276	3	1.08552		-0.200167	3	1.7693		-0.455551	3	2.00993		-0.591499	3	3.00298		0	3	0.377486		-0.342202	3	1.87463
WBGene00021657		-0.0496805	13	3.24676		-0.0352414	13	1.91037		-0.454739	13	19.5836		-0.272033	13	6.84042		0.166586	13	0.149904		-0.0138115	13	3.53423
WBGene00020091		-0.0182586	12	2.40145		-0.47425	12	77.9575		-0.846554	12	185.939		-0.110704	12	1.89098		-0.181831	12	1.48614		0.357376	12	0.428276
WBGene00020088		-0.167301	11	5.54213		-0.253537	11	9.67367		-0.280227	11	4.43157		-0.147902	11	2.19486		-0.0603442	11	0.647226		-0.0459374	11	3.19455
WBGene00020089		0.0841683	6	0.946663		-0.192803	6	2.73876		-0.570862	6	6.17085		-0.63116	6	9.19286		0.183636	6	0.208266		-0.0674208	6	1.67925
WBGene00004143		1.52037	18	4.43885e-06		-1.27707	18	7.10046e+06		-1.13185	18	24686.1		-1.01124	18	21690.2		-1.38634	18	193947		1.37944	18	0.000187735
WBGene00006385		-0.0472926	12	2.9053		-0.0413504	12	1.88158		-0.349131	12	7.99455		-0.19202	12	3.32244		-0.287981	12	2.939		0.0542612	12	2.15766
WBGene00020090		0.0364761	22	3.11105		0.126979	22	0.356052		-0.176112	22	8.0496		-0.00401313	22	1.35556		0.322191	22	0.0160831		-0.441667	22	536.558
WBGene00021733		0.0361313	11	1.57988		-0.0254945	11	1.54241		-0.132449	11	1.85218		-0.167225	11	2.48653		-0.0213735	11	0.513195		-0.0358047	11	3.03771
WBGene00021734		-0.0200584	8	1.73733		0.00794948	8	1.0328		0.351774	8	0.149053		0.281164	8	0.182433		0	8	0.422398		0	8	1.74614
WBGene00015570		0.14398	9	0.780681		0.0223602	9	0.97635		-1.11256	9	219.354		-1.3478	9	1313.32		-0.0436104	9	0.537608		-0.373886	9	9.6441
WBGene00006593		-0.228496	43	1603.86		-0.37917	43	100163		-0.77598	43	9.34651e+06		-0.829407	43	1.77807e+08		-1.13037	43	1.85603e+10		0.021615	43	97.6216
WBGene00021026		0.566468	3	0.19162		-1.08191	3	43.9023		-1.25465	3	15.0948		-0.945555	3	7.72552		-0.899038	3	2.72051		-0.704709	3	3.92416
WBGene00021027		0.226854	9	0.499524		0.0567687	9	0.768711		-0.258092	9	2.9111		0.0321998	9	0.65449		-0.27604	9	1.72456		0.326378	9	0.496702
WBGene00021025		-0.0124813	4	1.21021		-0.00945734	4	0.931959		-0.291436	4	1.55718		-0.0745901	4	0.81394		-0.00260802	4	0.388763		-0.017339	4	1.10297
WBGene00235388		-0.147346	7	2.87143		-0.119671	7	2.08445		-1.60774	7	642.535		-1.17359	7	153.127		-0.877587	7	14.766		-0.875179	7	33.0482
WBGene00021028		0.382017	11	0.187023		-0.0337504	11	1.64842		-0.9066	11	178.837		-0.764004	11	117.278		-0.613051	11	17.3894		1.41386	11	0.00226252
WBGene00021024		0	1	0.922923		0	1	0.774865		0	1	0.592877		-0.00948503	1	0.582627		0	1	0.360888		0.0232265	1	0.704828
WBGene00001814		0.605079	33	0.001387		0.406183	33	0.00100317		0.0202411	33	1.36716		0.356694	33	0.00481593		0.0816588	33	0.195987		0.225058	33	2.13251
WBGene00022035		-0.818272	18	4908.13		-0.485483	18	571.451		0.0864171	18	0.506		-0.24707	18	12.3892		-0.610186	18	148.75		-0.498837	18	261.801
WBGene00022036		-0.626114	6	18.9076		-0.39049	6	7.80195		-0.36013	6	2.77599		-0.182937	6	1.47019		-0.165085	6	0.732346		0.064826	6	1.10907
WBGene00022034		-1.29714	12	10567.3		0.343904	12	0.0684216		-0.700574	12	73.8445		-1.01963	12	1029.54		-1.89738	12	90816		-0.0946922	12	4.77614
WBGene00022039		-1.00408	6	93.0353		-0.410883	6	8.69167		-0.832499	6	16.6371		-0.944613	6	33.1259		-0.262613	6	1.04099		-0.332379	6	3.85537
WBGene00022037		-0.708747	32	259058		-0.347855	32	3196.01		-0.257123	32	80.1616		-0.074183	32	6.43507		-0.604148	32	10236.5		0.401803	32	0.218002
WBGene00022038		-1.28538	5	170.821		-1.17306	5	245.59		0.525303	5	0.116577		1.22999	5	0.00783498		-2.29432	5	526.444		-0.299295	5	2.74776
WBGene00022033		-2.07477	6	8490.86		-1.43637	6	1984.1		-0.138701	6	1.19917		0.082217	6	0.497093		-3.31822	6	63462.9		-2.33851	6	2084.44
WBGene00302974		-1.73782	11	89440		-1.50046	11	221652		0.169389	11	0.311765		0.125759	11	0.374924		-1.21468	11	625.182		-1.07486	11	530.319
WBGene00022043		-0.280291	1	1.73998		-0.229566	1	1.38815		0.0959003	1	0.504747		0.00843821	1	0.564922		-0.116943	1	0.41806		-0.0717733	1	0.797875
WBGene00022042		-1.15602	5	104.147		-1.9146	5	8282.08		-0.416768	5	2.78399		-0.425821	5	3.12135		-0.455094	5	1.64542		1.60658	5	0.0139902
WBGene00007009		-2.27374	21	3.76521e+10		-2.14251	21	8.49317e+12		-0.778404	21	3216.03		-0.786615	21	8294.32		-2.04552	21	1.63854e+09		-2.23735	21	2.16878e+09
WBGene00004235		-1.82608	33	5.38646e+12		-1.49128	33	4.25079e+13		0.357133	33	0.00816669		-0.261634	33	163.871		-1.97429	33	6.8328e+13		-1.19428	33	2.28519e+08
WBGene00002393		-0.631752	7	26.7412		-0.889218	7	187.512		-0.404867	7	4.0446		-0.115065	7	1.22271		-0.655682	7	5.97718		-0.641942	7	14.5985
WBGene00022040		-2.2965	14	5.20592e+07		-2.49476	14	4.75193e+10		-0.511865	14	37.0478		-0.519392	14	56.7788		-1.45664	14	21995.8		-0.714034	14	281.814
WBGene00000434		-0.600459	4	9.11674		-1.25992	4	176.447		0.205113	4	0.360669		0.345731	4	0.217252		-0.428988	4	1.21186		-0.398663	4	2.75875
WBGene00001725		-1.53468	8	3364.95		-0.460983	8	20.7482		-1.04753	8	97.8509		-1.5628	8	1970.68		-1.95609	8	3068.63		-0.728214	8	29.2289
WBGene00044427		-0.0671291	5	1.61728		1.01905	5	0.00747188		0.363989	5	0.200715		-0.147229	5	1.13983		0.0469628	5	0.340773		0	5	1.19913
WBGene00235390		-0.498309	3	4.89667		-1.17369	3	61.3268		-1.21281	3	13.5825		-1.01624	3	9.3294		-0.334205	3	0.786607		0	3	0.933378
WBGene00002040		-0.138459	63	4031.41		-0.4708	63	4.97185e+08		-0.395566	63	333857		-0.242292	63	11821.6		-0.508341	63	7.39705e+06		-0.20851	63	256508
WBGene00018923		0.200639	31	0.546379		0.0938971	31	0.550626		-0.2787	31	94.5746		-0.225213	31	66.2609		-0.108155	31	3.72553		0.0148109	31	25.9592
WBGene00018921		0.902941	15	0.00248571		0.506891	15	0.00841805		-0.601553	15	94.1846		-0.354651	15	19.0682		-0.0133831	15	0.549031		0.0406085	15	3.2318
WBGene00022028		0.398412	3	0.319583		-0.68059	3	10.1789		-0.241929	3	1.17246		-0.55348	3	2.71322		-0.414459	3	0.938266		-0.554085	3	2.88695
WBGene00022029		0.0535058	10	1.34315		0.124675	10	0.469856		-0.0717476	10	1.21165		-0.238037	10	3.37591		-0.0118509	10	0.471495		0.374574	10	0.400175
WBGene00022027		0.432064	6	0.218394		0.172432	6	0.395889		-1.6216	6	331.264		-1.39229	6	206.666		-0.759958	6	6.25585		2.1434	6	0.00163434
WBGene00022026		0.208151	44	0.459266		0.20879	44	0.0258312		-0.092348	44	17.2215		-0.248028	44	726.219		-0.0579588	44	3.29028		0.00284932	44	151.189
WBGene00022030		0.109184	3	0.770717		0.000421155	3	0.852168		0.451914	3	0.203606		-0.00657014	3	0.630346		-0.184448	3	0.566081		0.433949	3	0.385478
WBGene00022025		-0.190905	7	3.50946		-0.175931	7	2.89632		-0.556069	7	7.64797		-0.440552	7	5.39954		0	7	0.413007		-0.225364	7	3.39263
WBGene00022031		0.284686	12	0.32915		0.0444777	12	0.899217		-0.152069	12	2.29829		-0.145827	12	2.41219		-0.0162366	12	0.51295		0.22012	12	0.890677
WBGene00022032		0.143358	9	0.783303		0.0862261	9	0.626415		-0.0304738	9	0.920503		0.0632891	9	0.551447		0.161821	9	0.19189		-0.307635	9	7.28434
WBGene00044461		0	4	1.15943		0	4	0.895724		-0.197857	4	1.18202		0.0241125	4	0.596883		0	4	0.386069		0.160262	4	0.719663
WBGene00021215		-0.2819	8	6.42896		0.0747705	8	0.673518		-0.608804	8	12.8018		-0.535347	8	11.1469		-0.438843	8	3.10437		0.216028	8	0.756922
WBGene00021214		-0.0730259	11	3.09804		-0.0487214	11	1.85958		-0.164504	11	2.23802		-0.209648	11	3.27014		-0.236367	11	1.84599		-0.640874	11	61.3923
WBGene00021207		0.43288	11	0.136654		0.127181	11	0.451172		-0.199857	11	2.75742		0.903179	11	0.00247587		-1.54174	11	4382.77		-1.34993	11	2079.99
WBGene00021210		0.0381542	7	1.22178		-0.14934	7	2.4793		-0.365258	7	3.42295		0.118289	7	0.421576		-1.2194	7	59.465		-1.58998	7	404.224
WBGene00021208		-0.640338	10	74.0283		-0.0904321	10	2.3585		-0.187256	10	2.28203		0.0987016	10	0.450082		-0.592642	10	11.3988		-0.708296	10	58.4128
WBGene00021209		0.0958867	47	4.38272		0.0488159	47	1.83263		0.235388	47	0.0212886		0.0127849	47	2.524		-0.799761	47	8.85736e+07		-0.305029	47	58739.8
WBGene00004332		0.128416	4	0.74595		-0.586428	4	10.4742		-0.230485	4	1.30126		-0.0460934	4	0.744221		-0.119534	4	0.530995		0.0907549	4	0.850556
WBGene00004028		0.0602267	33	4.32334		0.042591	33	1.53977		-0.189101	33	32.935		-0.169679	33	34.7176		-0.11351	33	4.70671		-0.00817544	33	44.5076
WBGene00044434		0.440641	12	0.118327		-0.268635	12	13.2944		-1.09079	12	871.704		-0.804987	12	232.565		0.360053	12	0.0457389		-0.654662	12	94.7145
WBGene00236789		0.304219	4	0.407846		-0.692086	4	16.3129		-1.70394	4	99.8502		-0.892839	4	10.6485		1.04529	4	0.0237774		-0.000730138	4	1.0598
WBGene00000623		0.179569	11	0.652097		0.162972	11	0.338214		0.490568	11	0.0468154		0.335843	11	0.0965561		-0.506617	11	9.22697		-0.0480952	11	3.22899
WBGene00000624		-0.0845489	7	2.15015		-0.0814187	7	1.66671		-0.364901	7	3.4178		-0.306484	7	2.92865		-0.142784	7	0.739062		0.905342	7	0.0646115
WBGene00021213		0.292293	44	0.0923585		0.781455	44	7.69365e-09		-0.0263659	44	4.64886		0.12022	44	0.213314		0.0992087	44	0.112954		-0.0364277	44	295.437
WBGene00021212		-0.0839429	5	1.72471		0	5	0.940063		-0.375903	5	2.426		-0.27796	5	1.82869		-0.00225025	5	0.397644		0	5	1.19913
WBGene00020282		0.00503399	1	0.912473		0	1	0.774865		0.131586	1	0.475408		-0.088718	1	0.667783		-0.0442903	1	0.381558		0	1	0.726523
WBGene00020283		0.0118913	15	2.4412		-0.313456	15	37.946		0.104786	15	0.441165		0.0328723	15	0.74942		-0.659867	15	86.8529		0.750476	15	0.0335763
WBGene00020281		0.431359	18	0.0721978		0.580485	18	0.0017519		-0.119501	18	3.13755		-0.717174	18	1225.23		-0.189995	18	3.06156		0.24316	18	0.978736
WBGene00022518		0.0420484	100	306.984		-0.191524	100	5.20489e+06		0.162016	100	0.0176815		0.063104	100	1.23788		-0.619091	100	2.31046e+13		-0.134873	100	2.80469e+07
WBGene00022517		-0.436271	22	438.441		-0.916202	22	882964		0.0197989	22	1.01869		-0.0972247	22	4.02163		-1.70337	22	9.74965e+07		-0.2565	22	101.402
WBGene00022519		-0.326334	19	75.3291		-0.0300274	19	2.68789		0.619102	19	0.00359843		0.0793007	19	0.510995		-0.740288	19	716.827		-0.31795	19	85.3529
WBGene00022388		-0.132316	33	74.2092		-0.0627185	33	12.8902		-0.28507	33	141.623		-0.190377	33	49.2317		-0.101029	33	3.84091		-0.0250329	33	55.4379
WBGene00022389		-0.369817	42	18004.1		-0.788586	42	2.28349e+09		0.560064	42	6.12636e-05		0.190358	42	0.0502247		-1.73548	42	2625595139087560		-1.24582	42	8.39256e+10
WBGene00022386		0.0541526	26	3.22036		-0.656903	26	117328		-0.367143	26	129.624		-0.388101	26	291.623		-1.10947	26	1.16138e+06		-1.52038	26	1.34877e+08
WBGene00022390		-0.212375	15	13.8258		-0.0986604	15	4.19211		-0.102169	15	2.12375		-0.218316	15	6.10673		-0.391098	15	10.5802		-0.16606	15	12.2149
WBGene00001678		0.00326197	23	4.74639		-0.132181	23	15.5854		-0.050329	23	2.26018		0.0220497	23	1.02887		-0.130217	23	2.67695		-0.0155325	23	13.2223
WBGene00022385		0.193752	12	0.597671		-0.140135	12	4.40138		0.212094	12	0.229581		0.53739	12	0.021177		-0.464618	12	9.14091		0.265219	12	0.70022
WBGene00022391		0.563646	69	1.42452e-05		0.485371	69	7.59024e-08		0.39045	69	4.69134e-05		0.481249	69	6.4948e-07		0.069032	69	0.168322		0.424958	69	0.0528097
WBGene00022383		0.149273	6	0.719443		0.0749542	6	0.663372		-0.0716339	6	0.929967		-0.339709	6	2.79132		0	6	0.403825		0.145653	6	0.860693
WBGene00003548		0.466593	18	0.0527561		0.711364	18	0.000368612		-0.342945	18	22.7234		-0.533944	18	204.442		0.69134	18	0.000888258		-0.0207368	18	7.14424
WBGene00003238		-0.093896	34	47.1036		0.0545678	34	1.23148		0.188319	34	0.101699		0.309431	34	0.00959999		-0.429593	34	1013.58		0.11207	34	10.109
WBGene00018787		0.0449165	16	2.00498		-0.723193	16	3965.43		0.353647	16	0.0595011		-0.631285	16	269.376		-0.600793	16	74.1546		-0.935241	16	2749.23
WBGene00018788		-0.0503677	16	4.34753		-0.562623	16	699.281		-0.196774	16	4.90587		-0.317381	16	16.8747		-0.456166	16	22.3178		-0.264132	16	28.6637
WBGene00018786		1.88953	13	4.54618e-06		1.65857	13	3.52781e-07		1.20052	13	0.000275833		0.710587	13	0.00473384		-0.734735	13	74.8523		1.16962	13	0.00415197
WBGene00016932		0.0837689	29	2.56809		0.124266	29	0.321222		-0.392229	29	322.49		-0.442511	29	1284.69		0.221823	29	0.027716		-0.270331	29	552.033
WBGene00016931		0.0581768	5	1.00145		0.0915027	5	0.609002		-0.0923334	5	0.933441		-0.130887	5	1.07442		0	5	0.394847		0	5	1.19913
WBGene00016930		-0.150399	8	3.33235		0.104886	8	0.555483		-1.01497	8	84.1395		-0.835316	8	50.5023		-0.00129703	8	0.424895		-0.0275316	8	1.94242
WBGene00236808		0.134067	3	0.714502		-0.719724	3	11.7382		-0.226785	3	1.1285		-0.736899	3	4.42671		-1.12074	3	4.4276		0.846096	3	0.166432
WBGene00005002		0.123085	7	0.826198		-0.414418	7	11.6793		1.03181	7	0.00950723		1.08929	7	0.0050188		-0.354174	7	1.74918		0.839114	7	0.0814831
WBGene00021335		-0.188952	2	1.64397		-0.259486	2	1.81356		-1.73596	2	23.5601		-1.249	2	9.24549		-0.104217	2	0.441886		0	2	0.823481
WBGene00021327		-0.000676327	10	1.83696		0.00921838	10	1.11697		-0.0275372	10	0.950915		-0.0068209	10	0.846289		-0.0102986	10	0.467498		0.0105046	10	2.13743
WBGene00004952		0.0888813	12	1.18915		-0.224706	12	9.11066		0.248751	12	0.182065		0.357836	12	0.0735088		-0.964636	12	226.966		0.449699	12	0.261716
WBGene00021329		-0.0298009	5	1.40209		-0.210325	5	2.54991		-0.0357725	5	0.771525		-0.0749416	5	0.877643		-0.493358	5	1.85521		-0.355888	5	3.21418
WBGene00021332		-0.134763	13	5.86522		-0.159456	13	5.95558		-0.208342	13	3.71321		-0.155702	13	2.89063		-0.169271	13	1.51813		0.0520013	13	2.42856
WBGene00021331		-0.227422	2	1.82061		-0.859162	2	11.5748		-0.254665	2	1.04907		-0.782372	2	3.31929		-1.09605	2	2.45069		-1.1778	2	5.89756
WBGene00021333		-1.85612	15	4.57497e+06		-1.00835	15	47244.6		-1.37313	15	33000		-0.365361	15	20.8525		-1.78836	15	599291		0.305959	15	0.586191
WBGene00021334		-1.02185	40	1.04548e+09		-0.630813	40	1.95984e+07		-0.0534149	40	6.29835		-0.106387	40	22.2671		-0.710706	40	954926		-0.484874	40	184581
WBGene00021328		-2.51809	19	5.30251e+10		-1.22652	19	8.024e+06		-0.331247	19	24.4206		-0.196896	19	8.65822		-1.33531	19	231757		-1.66725	19	3.62954e+06
WBGene00001745		-2.10698	35	2058802492366870		-2.77151	35	1.64295e+26		-1.01146	35	2.22936e+07		-0.727933	35	922925		-2.80002	35	6.87111e+20		-1.19089	35	6.72143e+08
WBGene00019909		-0.43342	25	888.502		-0.316925	25	365.651		0.330882	25	0.0279864		-0.0608658	25	3.22279		-0.809369	25	15700		-0.191061	25	101.096
WBGene00044895		-1.14396	6	167.781		-1.18407	6	521.57		0.201662	6	0.330021		-0.0381826	6	0.813349		-1.34669	6	51.8927		0.0860096	6	1.03777
WBGene00019911		-0.0219706	11	2.26097		-0.548999	11	104.407		0.216307	11	0.236341		0.277378	11	0.140845		-0.32758	11	3.17755		-0.125081	11	4.73348
WBGene00022838		0.739812	12	0.0166248		-0.583526	12	199.581		-0.809038	12	146.657		-0.496674	12	27.4469		-0.180409	12	1.47262		1.10241	12	0.00804707
WBGene00236809		-0.0783099	7	2.08924		0.0848689	7	0.630409		-0.433843	7	4.56978		-0.224609	7	2.01564		-0.596439	7	4.69503		0.277112	7	0.583557
WBGene00022837		-0.184895	8	3.95928		-0.205424	8	4.04473		-0.167896	8	1.65803		-0.0773033	8	1.10974		0.0411096	8	0.350407		0.0280026	8	1.56683
WBGene00021689		-0.150237	42	325.115		-0.162986	42	337.954		-0.635832	42	453092		-0.653266	42	2.78952e+06		-0.161983	42	25.1666		-0.0508067	42	283.143
WBGene00000165		0.175211	6	0.644923		-1.56589	6	3939.47		-0.613116	6	7.24282		-0.745456	6	14.6706		-2.64112	6	5523.16		-1.56746	6	185.611
WBGene00004429		4.0641	4	1.00594e-06		0.577632	4	0.0794785		2.59529	4	0.000315769		1.90275	4	0.00162946		0.746232	4	0.0527826		1.8566	4	0.0121885
WBGene00021687		-0.0804242	15	4.98425		0.0125891	15	1.3394		0.293823	15	0.105001		0.272776	15	0.101058		-0.851473	15	389.568		0.0443923	15	3.15408
WBGene00001816		-0.0471085	26	10.8879		0.0595009	26	0.981967		-0.280477	26	44.8683		-0.621605	26	6918.82		-0.225278	26	11.838		0.0749145	26	7.60222
WBGene00004880		0.238853	42	0.264786		-0.27942	42	6309.24		-0.115911	42	23.2061		-0.0830915	42	16.2642		0.405196	42	0.00022273		-0.0505076	42	281.763
WBGene00021686		-0.0417822	33	19.4952		-0.0345859	33	7.30703		-0.184934	33	30.9138		-0.179546	33	41.0075		0.0424958	33	0.370884		0.0026987	33	38.6289
WBGene00021685		-0.0379508	119	45648.5		-0.0161472	119	690.364		-0.0829835	119	2890.81		0.0395392	119	5.69405		-0.174739	119	102508		0.132931	119	5130.71
WBGene00195068		0.215779	4	0.552595		0.215154	4	0.363376		0.232831	4	0.332391		0.422684	4	0.170586		-0.065037	4	0.459178		-0.17602	4	1.61528
WBGene00021690		1.72436	5	0.00170912		1.10333	5	0.00500926		1.0878	5	0.0175303		1.08365	5	0.0133002		2.74143	5	7.28668e-05		-0.0191305	5	1.2644
WBGene00021691		0.104844	26	1.75011		0.159459	26	0.192164		0.00503949	26	1.36156		0.42125	26	0.00499092		-0.268935	26	20.8806		0.188726	26	2.31091
WBGene00021692		-0.385471	13	33.503		-0.605702	13	353.945		-1.18698	13	2741.21		-0.892562	13	676.95		-1.48876	13	13539.9		-0.908928	13	581.437
WBGene00001707		-0.298484	31	586.977		-0.586471	31	238268		-0.262917	31	75.402		-0.188327	31	36.8204		-1.14682	31	3.1209e+07		-0.430109	31	6164.68
WBGene00271777		-1.2664	11	4880.55		-0.66694	11	269.854		-1.58944	11	10072.4		-1.23681	11	2484.03		-3.01135	11	2.76677e+07		-1.6118	11	7640.1
WBGene00021693		-0.053825	14	3.68231		-0.416167	14	82.4245		0.154776	14	0.310909		0.029154	14	0.754007		-1.05023	14	1103.35		-1.32558	14	11518.1
WBGene00021694		-0.0345856	2	1.09154		0.0445072	2	0.708703		0.277891	2	0.342738		0.0617893	2	0.52026		-0.120904	2	0.454806		-0.0437018	2	0.885887
WBGene00003400		-0.807417	77	4.79406e+13		-0.835769	77	4.07462e+17		-0.574654	77	2.42712e+09		-0.448987	77	2.46239e+08		-1.01493	77	3.8656e+16		-0.43226	77	2.93249e+09
WBGene00044896		-0.541694	7	17.661		-0.348091	7	7.92496		1.42144	7	0.00184117		0.26718	7	0.213704		-1.40429	7	126.33		-0.72766	7	19.7114
WBGene00019674		0.465234	5	0.211069		0.0391519	5	0.780702		-1.07832	5	25.8457		-1.42182	5	114.411		1.03348	5	0.0154456		-0.0484759	5	1.37149
WBGene00045052		0.0722665	1	0.783729		0	1	0.774865		-0.579896	1	1.56886		-0.49434	1	1.34255		0.262191	1	0.259527		0	1	0.726523
WBGene00045053		0.00654077	1	0.909368		0	1	0.774865		0.0309013	1	0.562916		-0.0921558	1	0.671747		0	1	0.360888		0	1	0.726523
WBGene00004888		-1.69159	2	88.5463		-2.62921	2	2751.44		-2.5326	2	125.586		-3.02159	2	452.808		-1.57887	2	5.64218		-0.455896	2	1.76445
WBGene00019673		-1.22668	15	35216.1		-0.879173	15	12559.1		-1.36448	15	30902		-1.41928	15	138619		-1.59017	15	126902		-0.730007	15	459.821
WBGene00022363		-0.0792196	32	30.4451		-0.337844	32	2625.91		-0.314052	32	185.907		-0.430322	32	2215.64		-0.258535	32	43.2533		-0.0543651	32	70.2593
WBGene00022366		0.0126691	11	1.82593		0.0363788	11	0.937233		-0.263913	11	4.02468		-0.262366	11	4.59632		-0.0811508	11	0.732587		0	11	2.54267
WBGene00303097		0	1	0.922923		0.0163957	1	0.743262		-0.121082	1	0.726452		-0.0696628	1	0.64623		0	1	0.360888		0	1	0.726523
WBGene00022365		-0.00517297	6	1.37965		-0.031345	6	1.16474		-0.00107873	6	0.711726		-0.00240051	6	0.702628		0	6	0.403825		-0.0243689	6	1.46713
WBGene00022367		-0.0673975	10	2.70112		-0.137638	10	3.36047		-0.120075	10	1.5791		-0.100683	10	1.48403		0.00200508	10	0.436992		-0.157756	10	4.63641
WBGene00022372		-0.0199703	13	2.64098		0.0550866	13	0.835652		0.156332	13	0.316927		0.0855345	13	0.484431		-0.0530244	13	0.68122		0.153804	13	1.35924
WBGene00022371		-0.258634	23	81.5312		-0.144672	23	18.7186		-0.621397	23	1190.59		-0.543742	23	989.627		0.0211066	23	0.463385		-0.0171138	23	13.4195
WBGene00022368		0.211853	5	0.556341		0	5	0.940063		-0.149322	5	1.13097		-0.0220541	5	0.724875		0	5	0.394847		0.136686	5	0.821117
WBGene00022369		0.00524698	13	2.21637		0.128893	13	0.42522		-0.273315	13	5.75668		-0.151167	13	2.79516		-0.217834	13	2.12177		-0.00290048	13	3.32108
WBGene00022373		0	7	1.45654		0	7	1.03543		-0.00115475	7	0.738184		-0.000437805	7	0.724706		0	7	0.413007		0	7	1.54054
WBGene00018159		0.0329643	2	0.912456		-0.0282939	2	0.887543		-0.354783	2	1.29462		-0.148731	2	0.825907		0	2	0.369094		0	2	0.823481
WBGene00004969		-0.429028	46	140853		-0.617705	46	1.47382e+08		-0.627776	46	1.29585e+06		-0.594006	46	2.86764e+06		-1.02777	46	9.8135e+09		-0.189406	46	5925.62
WBGene00001773		-0.482266	6	10.3102		-0.809619	6	71.8013		-1.82248	6	709.391		-1.10247	6	63.1722		-0.737336	6	5.7658		-1.93361	6	585.337
WBGene00018580		-0.830856	11	332.299		-0.847483	11	1154.6		-0.164411	11	2.2368		-0.0433041	11	1.11704		-0.35422	11	3.72375		-0.686871	11	77.1548
WBGene00018579		-0.99342	28	2.42176e+06		-0.922388	28	2.7196e+07		-0.172289	28	14.8264		-0.153326	28	15.0958		-1.60379	28	3.38391e+09		-0.0804159	28	52.6206
WBGene00001115		-0.408159	15	62.8258		-0.261107	15	22.1817		-0.988467	15	1778.08		-1.14108	15	13576		0.0182713	15	0.428465		0.72392	15	0.0398319
WBGene00022361		0.0430901	69	46.9284		0.0253885	69	7.49537		-0.171689	69	1245.77		0.0821398	69	0.492877		-0.243458	69	5384.13		0.302992	69	1.292
WBGene00022360		-0.0541551	34	25.7918		-0.0355091	34	7.96733		-0.250639	34	96.6877		-0.14636	34	26.0959		-0.0630679	34	2.18047		0.157826	34	5.47726
WBGene00022358		0.0488888	45	10.1226		-0.444641	45	968179		-0.343212	45	2998.19		-0.367828	45	12665.3		-0.0864341	45	6.45554		0.237167	45	2.8872
WBGene00005077		-0.0736817	23	10.9443		-0.0753176	23	6.76941		-0.148204	23	6.61603		-0.12377	23	6.04215		-0.280049	23	15.1995		-0.114101	23	33.278
WBGene00022270		-0.207279	26	74.7748		-0.109372	26	15.4503		-0.359409	26	117.915		-0.498804	26	1308.59		-0.474163	26	300.852		0.363467	26	0.371328
WBGene00022271		-0.470573	7	12.7272		-0.832351	7	134.472		-1.6453	7	752.693		-1.03734	7	82.2335		-0.435481	7	2.43639		-0.190975	7	3.00758
WBGene00022269		0.0444281	4	0.995358		0.0873244	4	0.62108		0.074023	4	0.530653		-0.00554792	4	0.655191		0.217323	4	0.216269		-0.0503831	4	1.19417
WBGene00022273		0.126298	3	0.731598		0.00664996	3	0.833054		0.130959	3	0.457604		0.317052	3	0.265753		0	3	0.377486		-0.0357023	3	1.00382
WBGene00044440		-0.0718375	21	8.71086		0.134452	21	0.328781		-0.113812	21	3.83615		-0.114307	21	4.47314		0	21	0.56579		-0.0409557	21	12.6723
WBGene00000269		-0.187955	27	68.82		-0.185091	27	61.782		-0.554463	27	1681.9		-0.270311	27	69.7479		-0.305923	27	39.8773		-0.193846	27	153.968
WBGene00022268		-0.0621823	8	2.14438		-0.163219	8	3.0876		-0.469782	8	6.72016		-0.218238	8	2.25686		-0.233446	8	1.22048		-0.0226342	8	1.90596
WBGene00022274		-0.38325	17	81.3963		0.0182053	17	1.36504		-0.899613	17	2080.26		-0.685695	17	626.265		-0.337868	17	10.018		-0.63461	17	509.059
WBGene00003111		-0.0679019	21	8.37217		-0.555247	21	3797.43		-0.640232	21	793.464		-0.806858	21	10403.5		-0.0499556	21	0.963231		-0.458116	21	464.102
WBGene00022156		-1.00394	12	1543.99		-1.06656	12	12727.9		-0.931985	12	319.209		-0.947133	12	622.897		0.946441	12	0.00105768		-0.213261	12	8.99038
WBGene00004168		-0.705938	6	26.4718		0.263808	6	0.244019		-0.167502	6	1.3375		-0.0732088	6	0.938612		1.61773	6	0.00118259		-0.654707	6	10.5967
WBGene00044358		-1.32434	31	9.96627e+08		-0.646837	31	753603		0.177921	31	0.134668		0.147316	31	0.17546		0.208112	31	0.0290505		-0.00087523	31	31.4808
WBGene00022157		-0.294243	20	67.6666		-1.21823	20	1.48638e+07		-0.5104	20	165.669		-0.133849	20	5.02628		-1.09698	20	39205.1		-0.459198	20	349.311
WBGene00022155		-1.34111	5	211.41		-1.69731	5	2954.06		-1.07438	5	25.5043		-1.2411	5	59.5198		-1.53185	5	48.1778		-0.443013	5	4.09166
WBGene00022158		-1.2943	8	1012.24		-2.01054	8	419313		-0.487969	8	7.31128		-1.36788	8	738.332		-2.37969	8	21043.2		-2.37057	8	16816.1
WBGene00185098		-1.61207	16	1.40423e+06		-1.39496	16	5.63987e+06		-0.605561	16	129.967		-0.233172	16	8.02569		-1.32535	16	30388.2		-1.52548	16	152153
WBGene00022154		-0.964433	9	306.249		-0.280142	9	7.98988		-0.640649	9	20.1586		-0.801038	9	64.5522		0.109623	9	0.249307		-0.491841	9	15.8945
WBGene00044348		-0.597071	16	368.845		-0.443555	16	193.11		-0.319022	16	13.0707		-0.213564	16	6.75043		-0.854002	16	606.939		0.198002	16	1.2376
WBGene00006702		-0.593728	10	56.5489		-0.718086	10	261.277		-1.16647	10	488.818		-1.37054	10	2961.33		-2.13744	10	54501.8		-0.12569	10	4.00031
WBGene00003080		-0.419413	2	3.02985		-0.0614025	2	0.98318		-2.43874	2	103.112		-1.76781	2	28.8778		-0.395619	2	0.730956		0.049221	2	0.758441
WBGene00022153		-0.378807	12	25.5661		-0.236831	12	10.1123		-0.279682	12	5.15224		-0.0693149	12	1.41939		-0.33093	12	3.87275		0.020854	12	2.57858
WBGene00022152		-0.194865	12	7.64928		-0.287119	12	15.5858		-0.316163	12	6.48965		-0.262022	12	5.3972		-0.117427	12	0.982606		0.0234286	12	2.5434
WBGene00006771		0.169619	76	1.3089		0.185042	76	0.00864637		-0.135451	76	793.292		-0.288997	76	495087		-0.227787	76	7921.01		0.437458	76	0.0297907
WBGene00022159		-0.132181	17	9.60087		-0.231422	17	23.2557		-0.334912	17	17.7251		-0.203785	17	7.08916		0.0269735	17	0.408166		-0.0950068	17	10.6512
WBGene00022150		0	3	1.07453		0	3	0.853476		0.00259367	3	0.632632		0.00496404	3	0.611237		0	3	0.377486		0	3	0.933378
WBGene00022149		-0.00222831	12	2.16174		0.00420366	12	1.27154		-0.00132581	12	0.885659		-0.00511499	12	0.909609		-0.00203289	12	0.468219		0.0532536	12	2.16928
WBGene00022148		-0.0963812	56	596.735		-0.116981	56	515.692		-0.328119	56	15030.6		-0.351467	56	83682.3		-0.388431	56	46151.2		-0.112369	56	7950.05
WBGene00022160		-0.176203	11	5.855		-0.13342	11	3.67772		-0.0861471	11	1.4092		-0.211891	11	3.31785		0.330612	11	0.0631093		-0.129175	11	4.83073
WBGene00022161		0.148089	17	0.883174		-0.711191	17	5409.79		-0.816922	17	1035.31		-0.757697	17	1223.3		-1.8644	17	6.55305e+06		-0.759691	17	1247.52
WBGene00022146		0.0520315	6	1.08401		-0.415304	6	8.89755		-0.156092	6	1.28089		0.158804	6	0.363424		-0.324985	6	1.30352		0.150031	6	0.848953
WBGene00022162		0.00713392	1	0.908148		-0.147009	1	1.12558		-0.0227843	1	0.615984		0.0122957	1	0.561183		-0.0211068	1	0.370595		0.0157007	1	0.711786
WBGene00022145		-0.95614	21	64543.4		-1.0515	21	3.1814e+06		-0.492895	21	178.409		-0.462318	21	219.955		-0.531651	21	162.88		-0.0685187	21	16.076
WBGene00022144		-0.803673	13	613.037		-0.571494	13	258.79		-0.222081	13	4.07394		-0.302023	13	8.54134		-0.0846483	13	0.847157		-0.119562	13	6.45834
WBGene00022143		-1.38957	9	3025.9		-0.52833	9	44.8288		0.314571	9	0.160705		0.2321	9	0.217533		-0.0658689	9	0.601095		-0.316798	9	7.57263
WBGene00044349		-0.088092	4	1.56905		-0.191101	4	1.99613		-0.0135477	4	0.686814		0.00986399	4	0.624215		-0.0238015	4	0.411366		-0.112159	4	1.38538
WBGene00022142		-0.546961	5	10.1364		-0.807534	5	43.3566		0.0121837	5	0.656448		-0.329303	5	2.20175		0.609978	5	0.0582941		-0.585241	5	6.06777
WBGene00044347		-1.84902	16	9.62385e+06		-1.58956	16	4.61958e+07		-0.487014	16	50.2498		-0.116762	16	2.87283		-1.83254	16	2.0488e+06		-0.963177	16	3324.38
WBGene00022141		-1.21671	15	32602.8		-0.724596	15	2573.05		0.357093	15	0.0649442		-0.0755647	15	1.85369		0.294986	15	0.0490454		-0.190025	15	14.2511
WBGene00044746		1.14129	3	0.0333138		-0.401083	3	3.67788		-1.4835	3	26.8906		-0.737949	3	4.43914		-2.90392	3	222.565		-0.123843	3	1.20133
WBGene00016907		-1.13987	9	788.105		-1.57253	9	63518.7		0.597835	9	0.038349		0.99135	9	0.0033157		-2.6048	9	203481		-0.316584	9	7.56576
WBGene00004441		-1.69981	2	90.4962		-1.59576	2	112.796		-1.84121	2	29.3896		-2.27059	2	87.0785		-4.7386	2	1323.03		-1.01757	2	4.51187
WBGene00001196		-1.00816	23	279057		-2.70586	23	3.84386e+17		-1.31161	23	2.31849e+06		-1.21823	23	3.56185e+06		-3.88806	23	2.20278e+19		-1.62028	23	4.44032e+07
WBGene00303070		-0.354708	1	2.059		-2.99311	1	1550.99		-1.96157	1	15.9415		-1.70655	1	10.8227		-2.63195	1	9.87986		-2.00182	1	9.90828
WBGene00001309		0.186171	6	0.615801		-1.57596	6	4155.29		-0.758238	6	12.5551		-1.74174	6	862.831		-2.13856	6	901.936		-0.527797	6	7.11675
WBGene00003750		-0.546604	2	4.24585		-2.76281	2	4158.12		0.289021	2	0.334818		-1.0737	2	6.29207		-2.70572	2	39.5092		-1.31183	2	7.37856
WBGene00006461		-0.395142	20	179.803		-0.33115	20	144.287		0.0404598	20	0.789203		-0.635745	20	1090.93		-0.824013	20	2434.33		-0.999331	20	30339.9
WBGene00044897		-0.0742148	4	1.49602		-0.149383	4	1.67577		-0.804594	4	7.06021		-1.09834	4	20.3118		-3.10929	4	1539.48		-1.48729	4	37.7889
WBGene00004743		-0.003552	10	1.86774		-0.0500745	10	1.74252		-0.174839	10	2.1319		-0.213075	10	2.90752		-0.169479	10	1.11926		-0.168147	10	4.86351
WBGene00022139		0.079196	38	4.09378		-0.159215	38	178.365		0.0450346	38	1.01956		-0.158167	38	50.4651		-0.557889	38	27147.9		0.124579	38	11.7568
WBGene00303094		0.0640507	1	0.798431		0.119371	1	0.572216		0.0487082	1	0.546344		-0.0818306	1	0.659911		-0.328203	1	0.545272		-0.0776379	1	0.804006
WBGene00022140		0.0122637	32	8.17382		-0.192924	32	152.778		-0.369591	32	422.386		-0.0943857	32	8.96327		0.197091	32	0.0320758		0.569845	32	0.0259703
WBGene00022138		0.0836087	62	10.7704		-0.0737997	62	212.89		-0.13656	62	222.577		-0.108662	62	169.668		0.0180694	62	0.828492		0.0911563	62	175.237
WBGene00021768		0.225759	7	0.514849		0.243263	7	0.249705		-0.404662	7	4.04111		0.0837768	7	0.493481		-0.358192	7	1.77807		-0.0203302	7	1.65426
WBGene00021766		-0.237926	23	65.1142		0.0448371	23	1.16218		-0.219627	23	14.4874		-0.235538	23	23.4682		0.476882	23	0.00235378		0.176116	23	2.19746
WBGene00021765		-0.0482186	31	17.7331		0.0869826	31	0.628257		0.275838	31	0.0330267		0.159475	31	0.144565		0.110361	31	0.130228		0.0586343	31	15.146
WBGene00255420		0.0215006	10	1.61601		-0.00175374	10	1.21278		-0.154408	10	1.90604		-0.0986537	10	1.46612		-0.0632381	10	0.624995		0.0833978	10	1.52829
WBGene00021771		0.00344856	6	1.3304		-0.0064923	6	1.02111		-0.015106	6	0.750595		0.00451443	6	0.683036		-0.00996106	6	0.418593		-0.0281237	6	1.48451
WBGene00044438		0	6	1.34989		0.0248641	6	0.864881		0	6	0.708822		0.0269531	6	0.623148		0	6	0.403825		0	6	1.35916
WBGene00021764		-0.0812493	16	5.58706		-0.162025	16	9.21373		-0.0130601	16	1.12499		-0.0853636	16	2.17755		-0.162527	16	1.94924		0.220114	16	1.06483
WBGene00021763		-0.123247	15	6.94063		0.135472	15	0.379813		-0.32399	15	11.4453		-0.317866	15	14.0246		-0.610116	15	58.8222		0.282517	15	0.681615
WBGene00021238		-0.0120898	65	166.733		-0.108908	65	1048.74		-0.0703601	65	44.0038		-0.213582	65	6406.84		0.0958484	65	0.0756296		0.27186	65	2.63674
WBGene00021237		-0.0340633	27	10.1764		0.204929	27	0.0857728		-0.560064	27	1805.54		-0.326377	27	153.201		-0.415709	27	174.95		-0.121377	27	70.2431
WBGene00021239		-0.239999	35	511.032		-0.323141	35	3881.13		0.111258	35	0.33514		-0.0339341	35	3.91992		-0.0984848	35	4.22807		0.216942	35	2.59774
WBGene00044435		-0.671457	6	22.8905		0.796346	6	0.0145436		-0.553742	6	5.78309		-0.0130084	6	0.73378		-1.17236	6	27.676		0.168855	6	0.800279
WBGene00021346		-0.134683	10	3.98477		-1.59803	10	192028		-0.636328	10	26.7455		-0.246036	10	3.54143		-2.77342	10	1.78337e+06		-0.607216	10	36.6848
WBGene00021347		0.600033	2	0.202704		-0.0206705	2	0.866874		-1.16471	2	7.09625		-0.756574	2	3.13653		-0.296236	2	0.615664		-0.688935	2	2.60485
WBGene00021348		0.42227	5	0.24877		0.745538	5	0.0273526		-0.857495	5	12.2846		-1.39259	5	102.934		-1.16255	5	15.1303		-0.184018	5	1.99654
WBGene00021349		0.596	13	0.0365063		0.584443	13	0.00657072		-1.45588	13	16828.2		-0.72057	13	189.44		-0.436861	13	9.6034		-0.165238	13	8.37932
WBGene00004409		0.663016	4	0.118945		1.02672	4	0.0120899		0.902359	4	0.0462518		0.291805	4	0.25737		0.935969	4	0.0318248		1.63808	4	0.0206118
WBGene00021350		-1.00002	4	35.9573		-0.105983	4	1.39694		-1.51079	4	56.5267		-1.74763	4	156.262		-1.76648	4	42.8878		-0.55293	4	3.99746
WBGene00004014		0.0899262	5	0.886923		-0.86313	5	56.4429		0.281003	5	0.265444		0.529114	5	0.0987881		-0.631901	5	2.86479		0.572583	5	0.245433
WBGene00021351		-0.356939	13	27.4761		0.0696013	13	0.731684		-0.301146	13	6.9461		-0.249571	13	5.79233		-0.037199	13	0.610814		0.0992822	13	1.85476
WBGene00021352		-0.167846	22	26.4064		0.00529864	22	1.98327		-0.400777	22	86.1519		-0.282375	22	34.8754		-0.366121	22	33.934		0.00498328	22	9.64412
WBGene00021353		0.117072	29	1.6545		0.290032	29	0.0163286		-0.449688	29	700.848		-0.331656	29	244.077		-1.22937	29	3.33782e+07		0.264365	29	1.14056
WBGene00003799		0.192065	58	0.632921		0.107729	58	0.313733		0.00132522	58	4.39		0.0596835	58	0.940716		-0.169986	58	152.442		0.251069	58	3.49378
WBGene00044810		2.01965e-05	3	1.07446		-2.41971e-05	3	0.853552		0	3	0.636786		-3.65723e-05	3	0.61945		0	3	0.377486		0	3	0.933378
WBGene00021354		0.418189	23	0.0524557		0.615961	23	0.000267745		0.257981	23	0.0766989		0.326311	23	0.0255952		-0.574877	23	463.298		0.803769	23	0.00615767
WBGene00021355		-0.119032	55	904.053		-0.00444622	55	12.1525		-0.49149	55	690521		-0.119001	55	119.643		-0.124187	55	33.1379		0.238626	55	4.11012
WBGene00235158		-0.810271	6	41.0965		-0.122216	6	1.88459		-1.11742	6	48.9941		-0.98492	6	39.0621		-0.188776	6	0.797656		-0.472119	6	5.97629
WBGene00021009		-0.0503815	79	1809.36		-0.0565197	79	440.029		-0.26976	79	109854		-0.165779	79	7155.95		-0.115773	79	167.55		0.0504651	79	2818.11
WBGene00021008		-0.0502724	6	1.66855		-0.0600627	6	1.35604		-0.0682366	6	0.918067		-0.0633591	6	0.901555		-0.0221865	6	0.437459		-0.00847947	6	1.39579
WBGene00021005		0	1	0.922923		0	1	0.774865		0	1	0.592877		-0.0049479	1	0.578093		0	1	0.360888		-0.0122129	1	0.738197
WBGene00001542		-0.140307	26	33.4088		-0.106318	26	14.699		-0.386326	26	163.934		-0.352716	26	180.477		0.196442	26	0.0492564		0.345689	26	0.447242
WBGene00021006		-0.538086	7	17.3699		1.23951	7	0.000737499		1.70391	7	0.00056007		0.854073	7	0.0146804		-0.198872	7	0.928872		0.7469	7	0.112554
WBGene00021007		0.0139131	19	3.18769		-0.523359	19	1256.45		-0.563569	19	211.076		-0.865732	19	8195.99		0.222766	19	0.062169		0.319936	19	0.553368
WBGene00017399		-0.914217	12	857.092		-0.641557	12	328.795		-0.63701	12	49.3955		-0.505341	12	29.1462		-0.66662	12	33.4613		0.699028	12	0.0692128
WBGene00017398		-0.124924	8	2.93404		-0.78386	8	163.727		-0.0157268	8	0.818896		0.0529499	8	0.575843		-0.852973	8	20.3913		-0.703416	8	26.5546
WBGene00000020		-0.89815	50	8.57865e+09		-0.851888	50	7.06092e+11		-0.242658	50	779.657		-0.133035	50	105.506		-0.0479981	50	3.48142		-0.456675	50	2.21714e+06
WBGene00021458		-0.28138	3	2.53021		-0.870295	3	20.3125		-0.10493	3	0.829803		-0.502321	3	2.36695		-0.443519	3	1.00012		0.10891	3	0.747599
WBGene00000408		-0.0854404	13	4.1629		-0.226895	13	11.0413		-0.104017	13	1.83651		-0.174695	13	3.32711		-0.0478848	13	0.657507		-0.0242038	13	3.74994
WBGene00021469		-0.20271	25	60.5984		-0.282732	25	213.264		0.227392	25	0.095093		0.537093	25	0.00128695		-1.04183	25	288949		0.608414	25	0.0315575
WBGene00021470		0.223465	27	0.415377		-0.0549923	27	6.88147		-0.130554	27	7.84092		0.218406	27	0.0732375		-0.155086	27	5.22887		0.77586	27	0.00423467
WBGene00021468		0.210152	18	0.517542		-0.154891	18	11.1447		0.608026	18	0.0049754		0.973693	18	8.16576e-05		0.0917702	18	0.226478		1.80706	18	7.49282e-06
WBGene00002047		1.71801	11	4.92473e-05		0.940362	11	0.000647003		0.490673	11	0.0467864		0.912584	11	0.00232999		-0.946047	11	126.289		0.959351	11	0.0216413
WBGene00021467		0.648587	8	0.0614835		-1.03158	8	798.797		0.183093	8	0.325795		-0.563057	8	12.8164		-1.88902	8	2262.24		0.53787	8	0.217876
WBGene00021476		-0.194589	12	7.63545		-0.438939	12	57.5354		-0.558009	12	29.9674		-0.588292	12	51.793		-0.808459	12	83.2246		-0.614436	12	76.4223
WBGene00021475		0.63474	2	0.184873		0.359381	2	0.267787		-0.0526354	2	0.686274		-0.711383	2	2.8403		-0.816554	2	1.51229		0.115302	2	0.679127
WBGene00021466		0.843641	16	0.00305109		0.595142	16	0.00257426		0.442937	16	0.0290856		0.758861	16	0.00126546		0.0644715	16	0.296051		1.19182	16	0.00143774
WBGene00021465		1.52636	12	9.54769e-05		2.04148	12	3.11154e-08		0.639322	12	0.0153889		0.869917	12	0.00211313		0.553848	12	0.0131713		1.96039	12	8.27657e-05
WBGene00003156		1.65153	24	4.53742e-08		1.8627	24	1.15408e-12		1.42381	24	1.21025e-07		1.55186	24	4.40742e-09		-0.556032	24	494.518		1.15924	24	0.000163612
WBGene00219275		0.688938	3	0.131994		-0.342728	3	2.97369		-0.458244	3	2.02364		0.433364	3	0.194834		-0.047534	3	0.419036		-1.25146	3	11.9574
WBGene00021471		1.91371	24	2.37709e-09		1.05184	24	2.63493e-07		1.40866	24	1.43828e-07		1.17243	24	5.28109e-07		1.33573	24	6.10955e-08		1.48516	24	6.86289e-06
WBGene00021477		1.26708	11	0.000795344		0.93466	11	0.0006774		-0.0503866	11	1.14101		0.449862	11	0.0462405		0.258375	11	0.0970263		1.01907	11	0.0160856
WBGene00021472		0.65622	13	0.0240207		0.777348	13	0.00112392		0.716993	13	0.0072072		1.51116	13	1.2611e-05		0.159008	13	0.157943		0.685696	13	0.0655229
WBGene00021464		-0.22188	8	4.76304		-0.0218256	8	1.24954		-0.198781	8	1.91325		-0.255769	8	2.72647		-0.164931	8	0.893894		0.202962	8	0.796174
WBGene00021463		0.10217	18	1.35369		0.173192	18	0.223943		-0.0196237	18	1.29488		-0.120866	18	3.6093		0.441932	18	0.00890396		0.362681	18	0.39781
WBGene00077563		0.653816	15	0.0170614		0.218426	15	0.162211		-0.387465	15	18.5335		-0.763154	15	578.085		-0.688816	15	108.959		0.257215	15	0.802107
WBGene00021461		0.0740269	35	3.87489		0.0766298	35	0.78426		-0.518926	35	8246.43		-0.533079	35	28635.2		0.267324	35	0.00775233		0.226681	35	2.27193
WBGene00021473		0.218972	19	0.473924		0.397648	19	0.0130314		-0.0451528	19	1.71504		0.0327264	19	0.823497		-0.26743	19	7.26201		0.294396	19	0.677059
WBGene00021474		-0.0582628	34	27.4485		-0.0426251	34	9.23362		-0.228314	34	68.2197		-0.277489	34	253.866		-0.111272	34	4.89045		-0.0272228	34	65.3027
WBGene00021460		-0.0727231	26	14.8172		-0.0650882	26	7.50044		-0.930631	26	128346		-0.629542	26	7705.12		-0.552303	26	830.795		0.0866895	26	6.72101
WBGene00017741		-0.111384	15	6.33234		-0.0202191	15	1.87518		0.336725	15	0.075807		0.196555	15	0.191		-0.18081	15	2.03771		-0.212909	15	16.5116
WBGene00017734		0.28628	11	0.337601		0.273234	11	0.1392		0.365454	11	0.0979843		0.740128	11	0.00709566		0.242591	11	0.106587		0.493396	11	0.21912
WBGene00017735		1.72199	5	0.00172465		0.396979	5	0.142953		0.0378271	5	0.602128		-0.268817	5	1.76922		-0.263409	5	0.901984		0.398511	5	0.397536
WBGene00017736		0.189067	8	0.610984		0.220204	8	0.265615		0.618977	8	0.0431895		0.892452	8	0.0083939		-0.496518	8	4.03479		0.301632	8	0.543498
WBGene00017737		-0.362802	9	11.9758		-0.191124	9	4.30417		-1.54706	9	1975.46		-1.50906	9	3193.49		-0.0534551	9	0.564815		-0.331959	9	8.07488
WBGene00017738		0.340358	6	0.321473		0.0341058	6	0.823572		-1.00039	6	31.4394		-0.731845	6	13.8764		-0.048349	6	0.480737		0.000180697	6	1.35839
WBGene00017733		0.107918	6	0.85647		-0.11337	6	1.79834		-0.374718	6	2.93382		-0.120464	6	1.13872		1.01646	6	0.0103377		-0.5358	6	7.29765
WBGene00255457		-0.0123682	2	1.02906		0.990934	2	0.0380203		-1.27249	2	8.89926		-0.820301	2	3.6075		0	2	0.369094		-0.747046	2	2.87057
WBGene00017732		-0.0036865	4	1.1742		0.00253687	4	0.886246		-0.00827888	4	0.676237		-0.18715	4	1.15933		-0.0660754	4	0.460451		-0.383362	4	2.65911
WBGene00002141		0.0870711	29	2.45854		-0.0319729	29	5.32476		-0.246845	29	45.2451		-0.136033	29	13.0229		-0.410117	29	249.48		0.309004	29	0.680728
WBGene00022280		0.0227356	5	1.14684		0.121951	5	0.527085		-0.181587	5	1.2608		-0.0563727	5	0.820649		0	5	0.394847		0.00120898	5	1.19512
WBGene00022281		0.0894819	35	3.04728		-0.0992021	35	33.0687		-0.405043	35	1326.6		-0.524634	35	24633.8		-0.177656	35	16.5364		0.434362	35	0.130419
WBGene00022282		-0.381246	4	4.29418		-0.0422477	4	1.06933		-1.41573	4	42.7212		-1.84719	4	213.66		-1.83337	4	51.2627		2.24778	4	0.00475903
WBGene00001232		0.488416	17	0.0487226		-0.19332	17	15.086		-0.322196	17	15.9217		-0.117397	17	3.17486		-0.56044	17	70.5853		0.710493	17	0.033151
WBGene00021277		-0.0949023	16	6.24234		0.154235	16	0.302036		-0.0748814	16	1.84658		-0.01282	16	1.14796		-0.357248	16	9.81701		0.0812656	16	2.7373
WBGene00021276		-0.131348	14	6.50561		0.0141164	14	1.2662		-0.078851	14	1.66043		0.124541	14	0.355644		0.218915	14	0.0964408		0.26792	14	0.728687
WBGene00021275		0	10	1.8298		0.0783738	10	0.664939		0.0600667	10	0.588326		-0.0250869	10	0.944033		0	10	0.441824		0	10	2.24329
WBGene00021274		-0.730476	10	124.626		0.375979	10	0.0713489		0.848467	10	0.00781599		1.16404	10	0.000766899		-1.45166	10	1267.54		0.749265	10	0.0713482
WBGene00021279		0.181508	5	0.624814		-0.165423	5	2.06066		-0.912227	5	14.7714		-0.622941	5	6.3665		-0.323974	5	1.09066		-0.0221605	5	1.27506
WBGene00021280		1.51289	6	0.0022929		0.075793	6	0.660432		-0.351417	6	2.6858		0.131583	6	0.406219		-1.83893	6	306.164		0.452951	6	0.328262
WBGene00021272		0.270832	6	0.43096		-0.216349	6	3.10247		-0.223919	6	1.65643		-0.0445587	6	0.834836		0.47473	6	0.0729065		0.841375	6	0.0970677
WBGene00194701		0.162334	4	0.663927		-0.012334	4	0.943269		-0.719129	4	5.48888		-0.552879	4	3.65874		-0.00472053	4	0.390959		1.71728	4	0.0170379
WBGene00016950		0.101511	13	1.13516		1.2236	13	1.89097e-05		0.300114	13	0.120105		0.11832	13	0.380016		-0.62071	13	34.1064		-0.0201385	13	3.66403
WBGene00016949		-0.00325942	3	1.08524		-0.190939	3	1.71082		-0.565829	3	2.65474		-0.0649404	3	0.736604		-0.118998	3	0.490269		0	3	0.933378
WBGene00006047		0.665096	6	0.0817687		0.00241577	6	0.974055		-0.44932	6	3.89269		0.664721	6	0.0459055		-0.763599	6	6.33852		1.88706	6	0.00365217
WBGene00016948		0.520089	7	0.132695		0.0510432	7	0.768268		0.738871	7	0.0326638		0.306364	7	0.178714		-1.28949	7	79.1259		-0.372128	7	5.67308
WBGene00000006		0.484583	12	0.0886941		-0.417188	12	47.7166		-0.750943	12	101.554		-0.667786	12	89.8581		-0.0918893	12	0.83394		-0.0932701	12	4.74005
WBGene00001404		-0.0971848	8	2.55426		-0.121318	8	2.36154		-0.363529	8	4.10639		-0.424965	8	6.39295		-0.0301699	8	0.484479		-0.0598152	8	2.20087
WBGene00004226		0.278436	23	0.239216		-0.104158	23	10.3333		-0.472711	23	232.887		-0.43213	23	255.272		-0.730839	23	2824.26		0.499689	23	0.106178
WBGene00019461		0.59452	16	0.0230822		0.999092	16	3.27115e-05		0.484767	16	0.0207996		0.859028	16	0.000522796		-0.567171	16	56.0926		1.05313	16	0.00369195
WBGene00000832		0.189144	29	0.638906		0.281098	29	0.0191726		0.235002	29	0.0673988		0.0232988	29	1.1968		-0.000701007	29	0.684155		0.864661	29	0.00110377
WBGene00021271		0.0119825	7	1.37833		-0.0352456	7	1.27238		-1.51051	7	426.557		-1.5769	7	964.534		-0.958339	7	20.5206		-1.2869	7	139.807
WBGene00021270		1.30476	9	0.00150086		0.441558	9	0.0530262		-0.180538	9	1.96647		-0.630672	9	25.2471		-3.09474	9	2.37461e+06		-0.288237	9	6.70975
WBGene00021269		0.960758	8	0.0129203		0.492745	8	0.0464488		0.705099	8	0.0289727		1.24608	8	0.00141394		-1.77719	8	1360.84		0.387052	8	0.390529
WBGene00000800		-0.56148	28	9569.24		-0.205158	28	101.853		-0.0353635	28	2.47081		0.152289	28	0.17916		-0.377631	28	127.928		0.284	28	0.889826
WBGene00023172		-0.153512	6	2.57846		0.905178	6	0.00817293		-0.612176	6	7.21705		-0.391198	6	3.44556		-1.07879	6	19.7501		-0.219808	6	2.7084
WBGene00018231		0.0444209	2	0.885141		-0.135739	2	1.23714		0.193526	2	0.409192		-0.201912	2	0.928182		0	2	0.369094		0.682141	2	0.263303
WBGene00018230		-0.0701667	9	2.47492		0.253033	9	0.196539		-0.97996	9	112.165		-0.575438	9	18.6223		-2.346	9	55575.1		1.29199	9	0.00831407
WBGene00018232		-0.0949519	33	42.7432		-0.466771	33	44760.5		-0.580032	33	12535.4		-0.601764	33	50975.6		0.158502	33	0.0560649		-0.160916	33	325.521
WBGene00018233		0.245831	5	0.488537		-1.34176	5	546.788		-0.852731	5	12.089		-1.41569	5	111.903		0.0745862	5	0.312493		-0.331241	5	3.00203
WBGene00017979		-0.356386	13	27.3707		-1.08109	13	27466.4		0.64302	13	0.0118732		0.656144	13	0.00708413		-1.21224	13	2012.68		0.438813	13	0.2677
WBGene00017980		-1.52502	35	2.42343e+11		-1.73097	35	3.97587e+16		-0.336234	35	439.832		-0.459424	35	7705.01		-1.39848	35	2.24748e+10		-1.44595	35	2.24734e+10
WBGene00000788		-0.997837	11	930.934		-1.47741	11	184114		-1.27319	11	1557.14		-1.03924	11	693.584		0.0849975	11	0.272409		0.00705071	11	2.45514
WBGene00017978		-1.25454	6	267.429		-0.760728	6	55.423		0.438502	6	0.134472		0.835127	6	0.0228671		0.0683032	6	0.315668		2.74932	6	0.00024429
WBGene00017977		-0.470388	7	12.7163		-0.139297	7	2.3379		0.514078	7	0.0842155		-0.0692599	7	0.992088		0.479758	7	0.0584518		1.05505	7	0.0382427
WBGene00017976		-0.813876	11	299.251		0.294585	11	0.117215		-1.18947	11	949.923		-0.796534	11	144.691		-1.036	11	215.759		-0.786569	11	126.614
WBGene00017975		-0.369004	10	15.4333		1.31867	10	6.06396e-05		0.776273	10	0.0116099		0.18752	10	0.26453		-2.02954	10	30157.7		1.01858	10	0.0206596
WBGene00003006		-0.842113	26	155040		-1.01069	26	3.77395e+07		-1.11258	26	1.19035e+06		-1.18595	26	1.45794e+07		-0.993679	26	257796		-0.698581	26	24871.7
WBGene00001048		0.0449549	9	1.33102		0.403023	9	0.0693087		-0.119503	9	1.44413		0.151973	9	0.338279		-0.0818316	9	0.651191		0.000781523	9	1.97262
WBGene00022128		-0.222081	15	14.9034		0.00133846	15	1.50322		-0.31366	15	10.5818		-0.154414	15	3.58122		-1.00555	15	1302.36		-0.41029	15	58.7871
WBGene00004920		-0.0543065	4	1.39715		-0.226447	4	2.31503		-2.82526	4	2715.39		-1.10351	4	20.6442		-1.46442	4	19.1663		-0.630853	4	4.82109
WBGene00022127		-1.41008	9	3379.43		-0.714211	9	163.13		-0.866663	9	63.2365		-1.31486	9	1095.32		-2.82914	9	626810		-0.0559871	9	2.50884
WBGene00022126		-0.119363	14	5.95768		-0.45534	14	120.549		-0.815377	14	326.584		-0.540568	14	67.0871		-1.02001	14	883.25		0.463031	14	0.223063
WBGene00022129		-0.797882	34	2.02608e+06		-0.624875	34	1.61022e+06		0.10652	34	0.364982		-0.518948	34	16747.6		-1.44326	34	2.41327e+10		-0.94917	34	1.50525e+07
WBGene00004043		0.93007	12	0.0047722		0.348992	12	0.0654914		0.270813	12	0.158349		-0.487564	12	25.7674		0.057847	12	0.318709		0.725695	12	0.0600348
WBGene00022130		0.0252048	6	1.21381		-0.194509	6	2.76362		0.465062	6	0.121593		0.422365	6	0.123683		-1.43664	6	71.7734		0.447819	6	0.333589
WBGene00004946		0.182154	45	0.757546		-0.0706848	45	43.1416		-0.209917	45	201.131		-0.314229	45	3780.01		-0.403336	45	6716.63		-0.28367	45	25203.3
WBGene00022125		0.128939	6	0.783836		-0.6548	6	31.6281		-1.43725	6	164.694		-1.26997	6	125.324		-0.312218	6	1.24487		-0.698237	6	12.147
WBGene00022131		0.166225	6	0.669822		-0.635994	6	28.63		-1.4233	6	156.213		-1.08818	6	59.5873		-1.04479	6	17.4719		-0.518523	6	6.9127
WBGene00022133		0.970056	18	0.000596153		0.970525	18	1.68315e-05		0.752845	18	0.00137886		0.648371	18	0.00196201		0.0973373	18	0.21512		0.970564	18	0.00408413
WBGene00020990		-0.846836	6	47.9459		-1.56609	6	3943.69		1.10117	6	0.0109063		1.15277	6	0.00623823		-1.47285	6	81.7852		-0.732402	6	13.5211
WBGene00255550		-0.0789813	1	1.10348		-0.230795	1	1.39249		-0.715942	1	1.97121		-1.0701	1	3.61783		0.106394	1	0.315695		-0.26527	1	1.02712
WBGene00020984		0.752143	8	0.0366453		0.600353	8	0.0233335		0.602501	8	0.0466175		0.155597	8	0.343378		-0.537617	8	4.86351		0.361822	8	0.430577
WBGene00020989		0.380411	9	0.218396		0.792283	9	0.00463469		-0.99317	9	119.916		-0.829108	9	75.3503		-0.314977	9	2.09643		0.197576	9	0.8571
WBGene00020988		0.310986	5	0.38077		0.0327333	5	0.804843		0.1553	5	0.405369		-0.497548	5	4.04559		1.61676	5	0.00247953		0.0392651	5	1.07553
WBGene00020985		0.829524	10	0.0151575		-0.4939	10	48.6246		-0.0458525	10	1.05133		-0.143977	10	1.92289		-0.200542	10	1.32715		0.623509	10	0.127269
WBGene00002174		0.384497	41	0.019897		-0.194061	41	631.93		-0.617551	41	237950		-0.823624	41	6.65608e+07		-0.230353	41	89.7802		1.0029	41	1.22191e-05
WBGene00020987		0.121054	3	0.74337		-0.109905	3	1.2736		-0.611773	3	2.98104		-0.274887	3	1.28996		0.397411	3	0.157667		0.415656	3	0.400119
WBGene00044796		-0.121687	6	2.25471		-0.352081	6	6.36602		-1.01954	6	33.8062		-0.35276	6	2.94435		-0.960801	6	12.9064		-0.156159	6	2.21821
WBGene00020986		0.00475711	4	1.14064		0.302179	4	0.252276		-0.0457243	4	0.755097		-0.876535	4	10.1167		-0.0524149	4	0.443981		0.219978	4	0.623418
WBGene00004077		-0.422117	21	297.111		-0.255649	21	65.2753		-0.821139	21	4957.98		-0.562259	21	673.222		-0.56717	21	237.774		-0.298821	21	117.35
WBGene00021126		-0.550525	1	3.20658		-1.47	1	32.4059		-1.45996	1	6.87004		-0.469094	1	1.28545		-0.700275	1	0.870586		-1.35853	1	4.27903
WBGene00021125		0.243874	8	0.464607		-0.0980551	8	2.03497		-1.10528	8	127.89		-0.965267	8	97.1777		-0.271831	8	1.45312		0.752117	8	0.0950991
WBGene00021127		0.070831	4	0.909074		-0.392427	4	4.64326		-0.383485	4	2.04219		-0.639796	4	4.80784		0.112454	4	0.286047		0.137932	4	0.759354
WBGene00021128		1.1935	11	0.00125225		0.117064	11	0.489458		1.11664	11	0.00116216		-0.398016	11	11.0365		1.23827	11	0.000283806		0.0850176	11	1.66666
WBGene00044433		-0.00380544	2	1.00595		0.850192	2	0.0587413		-0.861744	2	3.75523		-0.752654	2	3.10965		0.0580573	2	0.333878		0	2	0.823481
WBGene00022116		-0.0442077	1	1.02		-0.0711827	1	0.928411		-0.0553136	1	0.650543		-0.0745123	1	0.651648		-0.0512832	1	0.384928		0	1	0.726523
WBGene00022115		-0.0833077	8	2.38313		-0.0492401	8	1.48909		-0.0677937	8	1.04245		-0.112597	8	1.32564		-0.0211757	8	0.465073		0	8	1.74614
WBGene00022117		-0.44484	12	39.4265		-0.161344	12	5.28231		-0.0990843	12	1.64376		-0.36016	12	10.6555		-0.329449	12	3.83609		0.0600286	12	2.09228
WBGene00004412		0.371098	8	0.246025		1.1633	8	0.000636483		0.969862	8	0.00849068		0.632259	8	0.0311253		-2.2922	8	14138.7		-0.223891	8	4.15257
WBGene00022114		0.624196	9	0.0587229		-0.161919	9	3.51359		-0.697461	9	26.8698		-0.483174	9	11.2005		-0.322121	9	2.1729		0.259264	9	0.660017
WBGene00022113		0.0203717	6	1.23879		-0.0262524	6	1.13375		-0.312185	6	2.31465		-0.0134926	6	0.735234		-0.341464	6	1.38333		0.189832	6	0.749315
WBGene00022118		0	5	1.25104		-0.00585464	5	0.966541		-0.00057606	5	0.685275		-0.184559	5	1.30455		0	5	0.394847		-0.00171756	5	1.20485
WBGene00000199		-0.154353	32	89.6484		-0.19859	32	170.75		-0.0934654	32	7.14028		-0.082741	32	7.40485		-0.624062	32	14026.4		-0.587647	32	60111.8
WBGene00022112		-0.424873	10	21.3141		-1.17411	10	7989.26		-0.304253	10	4.3332		0.0845343	10	0.489901		-1.70638	10	5124.82		-1.36444	10	1196.47
WBGene00022111		0.212449	5	0.555074		0.947584	5	0.0104879		0.152862	5	0.408712		0.336682	5	0.198108		-0.983001	5	8.61588		-0.230448	5	2.27061
WBGene00022119		-0.0247471	22	5.90492		-0.00547061	22	2.30885		-0.292172	22	27.3903		-0.429728	22	194.593		-1.04211	22	62427.4		0.739238	22	0.0130331
WBGene00001791		-0.0507449	7	1.8401		-0.0440525	7	1.33962		0.0101942	7	0.703717		0.164505	7	0.341419		-0.257111	7	1.17771		0.446821	7	0.322027
WBGene00022110		-0.555289	13	109.07		-0.516667	13	156.67		-0.669995	13	83.7082		-0.450565	13	25.6567		0.435031	13	0.0235581		-0.55384	13	76.7969
WBGene00004049		0.0562592	53	13.5165		0.0631175	53	1.33374		-0.444659	53	140208		-0.14805	53	212.652		-0.175627	53	105.643		0.246106	53	3.27229
WBGene00022108		0.0101185	15	2.4749		0.170102	15	0.266269		0.167745	15	0.273511		0.497088	15	0.0155228		0.328485	15	0.0377259		0.0194253	15	3.70366
WBGene00022107		-0.229415	12	9.59516		0.102969	12	0.543676		-1.17009	12	1439.57		-0.633555	12	70.8792		-0.282976	12	2.84601		0.226269	12	0.861935
WBGene00022122		0.307266	6	0.369599		-0.372915	6	7.1086		-1.70472	6	453.96		-1.60925	6	501.889		-0.305424	6	1.21475		-0.599995	6	8.92557
WBGene00003836		-0.203317	2	1.70783		0.155666	2	0.50263		-0.154943	2	0.850807		-0.087154	2	0.721479		0	2	0.369094		0.215545	2	0.574354
WBGene00022121		-0.100118	31	36.6409		0.0729933	31	0.8204		-0.420358	31	722.525		-0.550275	31	11748.3		-0.315032	31	89.1451		-0.159502	31	221.322
WBGene00045398		-0.0605705	3	1.29206		-0.350825	3	3.06268		-1.1016	3	10.2591		-1.5681	3	40.6908		-1.2381	3	5.72984		-1.05734	3	8.05069
WBGene00284845		0.00614552	4	1.13522		-0.42598	4	5.34474		-0.0769486	4	0.827842		-0.442354	4	2.5852		-0.171308	4	0.609605		-0.306862	4	2.21239
WBGene00000237		0.178914	31	0.740334		0.197219	31	0.0767246		-0.510034	31	2617.43		-0.233459	31	75.5624		-0.364187	31	189.553		0.446259	31	0.129004
WBGene00044894		0	4	1.15943		0	4	0.895724		-0.12876	4	0.964339		-0.0385117	4	0.726699		0	4	0.386069		-0.0638586	4	1.2335
WBGene00022123		-0.29712	7	5.7244		-0.308784	7	6.2978		-0.445518	7	4.8002		-0.634919	7	13.1082		-0.360261	7	1.79312		-0.18743	7	2.97047
WBGene00022124		-0.257269	26	136.435		-0.338036	26	644.948		-0.408672	26	215.511		-0.619124	26	6689.99		-0.0489067	26	1.19558		0.138669	26	3.90159
WBGene00001046		-0.446692	10	24.1781		-0.0930479	10	2.40523		-0.538927	10	15.6822		-0.479384	10	14.3085		-0.694757	10	19.9567		-0.153497	10	4.54642
WBGene00021839		0.0799212	5	0.921523		0.0151949	5	0.874678		-1.18172	5	36.6133		-0.772563	5	10.9363		0.700196	5	0.0439283		0	5	1.19913
WBGene00021838		-0.475687	4	5.93936		0.152617	4	0.472328		-0.295624	4	1.57651		-0.185046	4	1.15169		0	4	0.386069		0.151447	4	0.735077
WBGene00003186		0.381962	37	0.0279011		0.222249	37	0.030499		0.408286	37	0.00217153		-0.077976	37	9.99823		-0.318426	37	263.638		1.0479	37	1.67641e-05
WBGene00000625		1.93518	9	5.02567e-05		1.19498	9	0.000282288		0.317509	9	0.158335		0.018546	9	0.705631		-2.08806	9	15244.7		2.68753	9	2.25243e-05
WBGene00021837		0.437186	6	0.213728		1.52365	6	0.000309027		2.27914	6	0.00012543		1.85076	6	0.000359223		1.86881	6	0.000478229		1.90932	6	0.00340583
WBGene00021843		0.0270144	10	1.56534		-0.0230368	10	1.42268		-0.262984	10	3.45603		-0.255262	10	3.74245		-0.100187	10	0.765393		-0.0404565	10	2.70236
WBGene00021842		-0.123983	9	3.3074		-0.148007	9	3.1898		-0.489743	9	9.39613		-0.42293	9	8.03651		-0.0011985	9	0.434606		0.0212381	9	1.8089
WBGene00021844		-0.708033	12	221.624		-0.647176	12	345.079		-0.978079	12	427.278		-0.578096	12	48.2594		-0.674682	12	35.24		-0.841219	12	256.23
WBGene00021845		0.40793	11	0.159393		0.134122	11	0.426649		-0.0450656	11	1.10573		-0.121612	11	1.85215		-1.02338	11	200.148		1.67358	11	0.000622552
WBGene00021841		-0.316963	10	11.4249		-1.0146	10	2415.05		0.0768512	10	0.536618		-0.417641	10	9.8887		-1.50335	10	1682.92		0.955048	10	0.0276756
WBGene00003387		0.00858227	37	12.3953		0.0950849	37	0.525231		-0.646624	37	118683		-0.0620354	37	7.41273		0.118754	37	0.093757		0.336789	37	0.501264
WBGene00021846		0.0384515	11	1.55742		-0.0948441	11	2.69583		-0.157933	11	2.15287		-0.218015	11	3.45169		0.158309	11	0.176054		0.157484	11	1.16275
WBGene00021840		0.0493618	21	2.56851		-0.15003	21	15.5815		-0.183764	21	7.79112		-0.122721	21	4.91488		-0.0841657	21	1.38667		-0.0406224	21	12.6359
WBGene00000205		0.32231	2	0.423488		-0.596482	2	5.1393		-0.987237	2	4.8879		-0.661001	2	2.5429		0	2	0.369094		0	2	0.823481
WBGene00019697		-0.121625	24	20.8413		-0.173359	24	32.9203		-0.352982	24	75.3053		-0.37868	24	165.923		-0.167267	24	4.55002		-0.0361716	24	18.4246
WBGene00019698		-0.201258	17	17.2868		-0.0882345	17	4.57299		-0.508412	17	76.6366		-0.4357	17	61.2589		-0.123323	17	1.52554		0.10615	17	2.51972
WBGene00003654		-0.684527	23	8310.04		-0.749835	23	133851		-0.0973407	23	3.78611		-0.289791	23	45.345		-0.641593	23	1003.88		-0.154651	23	48.648
WBGene00195056		-3.76484	6	1.05503e+07		-3.57557	6	1.64952e+08		-0.181212	6	1.40885		0.0583417	6	0.548078		-1.36497	6	55.4287		-3.26219	6	37784.1
WBGene00016663		-0.225	7	4.1063		-1.34394	7	2677.04		-0.286232	7	2.45357		-0.0386081	7	0.862593		0.417816	7	0.0752377		-0.299111	7	4.39272
WBGene00219460		0.10181	5	0.847509		-0.354505	5	5.05362		0.08232	5	0.518329		-0.27302	5	1.79631		-0.470719	5	1.72806		0.000118801	5	1.19873
WBGene00000626		-0.0724763	6	1.83228		-0.0200746	6	1.09726		-0.861102	6	18.5424		-0.993265	6	40.4182		0	6	0.403825		-0.778565	6	15.6279
WBGene00045387		0.282713	5	0.424256		-0.103996	5	1.53971		0.598499	5	0.0911048		0.280274	5	0.242932		0	5	0.394847		0.287744	5	0.540321
WBGene00019597		-0.235071	3	2.19757		-0.781368	3	14.6928		-1.18059	3	12.522		-0.911045	3	7.04577		-1.51434	3	10.5124		-0.591843	3	3.11786
WBGene00003062		0.583711	20	0.0137194		0.41956	20	0.00825967		1.19363	20	1.0869e-05		0.800752	20	0.000224007		0.307131	20	0.0242588		0.454567	20	0.183344
WBGene00019595		0.0579913	12	1.45626		0.262947	12	0.137294		-0.084166	12	1.49573		-0.43311	12	17.6669		0.303839	12	0.0656318		-0.336404	12	17.3411
WBGene00006888		0.294177	51	0.0678656		0.000662606	51	8.50547		0.248355	51	0.0122745		-0.0014323	51	4.12795		-0.337441	51	4691.65		0.248655	51	2.90154
WBGene00019598		0.760932	8	0.0350707		0.33661	8	0.126127		-0.257544	8	2.51234		-0.258229	8	2.76046		0.121244	8	0.24344		-0.67843	8	24.1075
WBGene00019594		-0.000353485	13	2.30435		-0.652608	13	543.763		0.926518	13	0.00175262		-0.499173	13	36.7716		-0.286572	13	3.40791		0.83476	13	0.0280109
WBGene00021829		-0.230826	2	1.83713		0.412124	2	0.227504		0.710953	2	0.138002		-0.196778	2	0.91778		-0.00953783	2	0.375224		0.254838	2	0.537842
WBGene00021828		-0.226072	10	6.75699		0.133398	10	0.4401		-0.772305	10	56.3528		-1.03978	10	409.202		-0.11237	10	0.818284		0.179788	10	0.980746
WBGene00021827		0.155589	2	0.659067		0	2	0.813222		-0.174011	2	0.885578		0.0188883	2	0.57164		-0.0620727	2	0.410863		-0.163165	2	1.08169
WBGene00021830		0.0188605	4	1.08671		-0.175399	4	1.86893		-0.902975	4	9.43357		-0.740908	4	6.60606		0	4	0.386069		-0.229673	4	1.83767
WBGene00021831		-0.0302588	29	11.5716		-0.0790394	29	12.4071		-0.174043	29	16.9222		-0.394606	29	626.768		-0.0399005	29	1.20349		-0.0374714	29	37.3867
WBGene00021832		-0.0128746	14	2.72619		0.074931	14	0.70175		-0.483693	14	30.2709		-0.292777	14	9.52443		-0.115992	14	1.1356		0	14	3.70256
WBGene00021833		-0.0698864	8	2.22854		0.215319	8	0.274046		-0.263491	8	2.58258		-0.461256	8	7.67515		-0.0858948	8	0.624127		0.150631	8	0.974874
WBGene00021835		0.190992	13	0.60946		-0.987674	13	11679.9		0.0767887	13	0.542107		0.42849	13	0.0382268		-0.152465	13	1.35206		1.0537	13	0.00803993
WBGene00001481		0.156075	28	0.973858		-0.16524	28	50.8112		-0.537216	28	1758.09		-0.182396	28	23.0155		-0.0982175	28	2.6035		-0.261847	28	401.149
WBGene00004404		-0.00874753	3	1.10352		-0.0207657	3	0.920529		0	3	0.636786		0	3	0.619389		0	3	0.377486		-0.0159658	3	0.964246
WBGene00000413		-0.384581	15	52.3552		-0.0422687	15	2.35101		-0.735765	15	260.966		-0.745411	15	498.469		-0.110558	15	1.17534		0.0751884	15	2.58718
WBGene00021826		0	7	1.45654		-0.0665606	7	1.52803		-0.12365	7	1.23682		-0.072314	7	1.00601		0	7	0.413007		-0.0130733	7	1.61274
WBGene00003258		0.142388	56	2.05535		-0.25541	56	48700.4		-0.541663	56	3.0748e+06		-0.206185	56	1481.11		-0.390334	56	48591.8		0.0892747	56	105.134
WBGene00021834		1.01487	13	0.00198579		-0.635266	13	463.945		-0.486209	13	24.2173		0.181737	13	0.237611		-2.38155	13	6.37483e+06		-0.312895	13	19.4442
WBGene00021553		0.364217	18	0.131271		-0.0519314	18	3.2699		-0.219279	18	7.59567		-0.250169	18	12.7702		0.671807	18	0.00106399		0.817818	18	0.0129056
WBGene00021552		-0.355782	5	4.87861		-0.177007	5	2.17707		-1.23853	5	44.3337		-0.984371	5	23.523		-0.356245	5	1.20682		-0.17957	5	1.97208
WBGene00020915		-0.111037	13	4.97352		-0.577111	13	272.445		0.348049	13	0.0869103		-0.37863	13	15.0617		1.18254	13	0.000136216		-0.254451	13	13.9345
WBGene00004154		0.0501248	16	1.92192		-0.124859	16	6.16586		-0.313306	16	12.4854		-0.270018	16	11.1098		-0.0396019	16	0.702472		0.0784556	16	2.7901
WBGene00020914		1.20049	21	2.3562e-05		-0.224812	21	42.9643		0.313209	21	0.0507575		0.500084	21	0.00461305		-0.580962	21	275.398		0.676675	21	0.0258683
WBGene00020917		0.422936	4	0.271287		0.371603	4	0.188559		-0.22815	4	1.29234		0.0321463	4	0.582003		0.260152	4	0.192928		-0.0125928	4	1.09046
WBGene00020913		0	1	0.922923		-0.00490296	1	0.784574		0.000207528	1	0.59267		0.0478344	1	0.527875		0	1	0.360888		0	1	0.726523
WBGene00000036		0.779967	27	0.000413584		0.422084	27	0.0021996		-0.31291	27	78.9405		0.234794	27	0.0581902		1.03661	27	5.59263e-07		-0.1704	27	119.444
WBGene00303088		0.267768	2	0.48942		1.15767	2	0.0227086		-0.538342	2	1.90371		-0.106029	2	0.752002		-0.111072	2	0.447148		-0.734255	2	2.80985
WBGene00021548		0.494822	6	0.167624		-0.0399116	6	1.21879		-0.547159	6	5.64056		-0.978625	6	38.0694		-0.518909	6	2.62303		-0.439402	6	5.39338
WBGene00021549		-0.156115	14	7.80289		-0.000613386	14	1.46078		-0.0288468	14	1.16009		-0.0595893	14	1.51707		0.0281322	14	0.392957		-0.0244257	14	4.29402
WBGene00021547		-0.0467517	2	1.12735		-0.149775	2	1.292		-0.229523	2	0.995106		-0.500297	2	1.78696		0	2	0.369094		-0.0394669	2	0.879638
WBGene00021551		-0.0289797	29	11.3778		-0.00960407	29	3.56208		-0.293599	29	85.0886		-0.2242	29	48.7942		-0.189007	29	10.3148		-0.230614	29	348.767
WBGene00021039		0.588786	33	0.00176424		-0.374839	33	7003.47		0.12605	33	0.273772		0.163601	33	0.125281		-1.05862	33	2.27918e+07		0.399032	33	0.221114
WBGene00195045		0.024229	5	1.14031		-0.0169832	5	1.01894		0.097483	5	0.492521		-0.0601781	5	0.832019		0.0734636	5	0.313596		0.0989497	5	0.91161
WBGene00021034		0.678344	14	0.01705		0.466339	14	0.015721		3.17271	14	1.2412e-10		1.4352	14	1.16593e-05		-0.889398	14	337.612		1.18056	14	0.00286922
WBGene00021035		-0.253526	5	3.29934		0.266439	5	0.265563		-0.503024	5	3.72256		-0.165565	5	1.21796		-0.590227	5	2.51381		1.31696	5	0.0312105
WBGene00021038		-0.154065	5	2.25529		-0.112126	5	1.60026		-0.711482	5	7.51231		-0.850543	5	14.4987		-0.129955	5	0.593515		-0.104303	5	1.6009
WBGene00021036		-0.301888	76	3.80707e+06		-0.414459	76	2.29461e+09		-0.307107	76	243771		-0.378982	76	1.41256e+07		-0.466618	76	4.81809e+07		-0.480934	76	8.96211e+09
WBGene00019362		-0.138009	7	2.75054		-0.2064	7	3.4611		-0.226067	7	1.90419		-0.245268	7	2.21489		-0.153811	7	0.773034		-0.42973	7	6.94149
WBGene00019361		-0.233759	8	5.05434		-0.13338	8	2.55101		-0.0291087	8	0.871306		-0.301671	8	3.43564		-0.312385	8	1.74724		-0.0214455	8	1.89721
WBGene00019360		-0.0493769	8	2.01145		-0.401279	8	14.1608		-0.350072	8	3.85803		-0.244278	8	2.57315		-0.169392	8	0.912205		-0.249179	8	4.57944
WBGene00004775		0.401165	36	0.0221053		-1.01006	36	1.58444e+10		0.451416	36	0.00122386		0.0601245	36	0.740774		-3.45395	36	2.77663e+26		0.108195	36	12.6366
WBGene00006440		-0.277022	33	628.562		-0.328049	33	2724.58		0.106371	33	0.369221		0.114437	33	0.287224		-1.24585	33	4.80974e+08		-0.923314	33	6.69764e+06
WBGene00021639		-0.0305911	20	5.26436		-0.162485	20	16.0731		0.486147	20	0.0104345		0.451714	20	0.00944472		-2.23351	20	4.15578e+09		-1.07399	20	56235.4
WBGene00003422		-0.471854	42	116275		-0.538479	42	4.24772e+06		-0.2357	42	226.021		-0.441126	42	31481.2		-0.302024	42	445.095		-0.367765	42	50007.8
WBGene00021640		-0.100969	12	4.13154		-0.292443	12	16.3162		-0.745957	12	98.4007		-0.621376	12	65.1416		-0.188407	12	1.55026		-0.00341128	12	2.93493
WBGene00004978		0.0741579	30	3.05604		0.0383011	30	1.5474		-0.370509	30	291.473		-0.327156	30	276.927		-0.272463	30	39.9042		-0.0610792	30	56.935
WBGene00021641		0.0263823	7	1.28987		-0.091935	7	1.77241		-0.393572	7	3.85663		-0.390725	7	4.30143		0	7	0.413007		0.120218	7	1.01106
WBGene00021638		0.0489012	4	0.980184		0	4	0.895724		-0.460001	4	2.55849		-0.756898	4	6.94647		-0.208867	4	0.673818		0.457803	4	0.351934
WBGene00000794		0.0762565	5	0.934532		-0.173079	5	2.13689		-0.939398	5	16.187		-0.840262	5	13.9696		0	5	0.394847		0.00720735	5	1.17542
WBGene00021643		0.0866279	41	4.10341		0.0055273	41	4.67212		-0.560938	41	83116.7		-0.657357	41	2.14318e+06		0.00852476	41	0.747702		0.235188	41	2.55561
WBGene00021637		-0.0434686	15	3.74544		-0.233872	15	16.7759		-0.692964	15	188.555		-0.519216	15	75.3708		-0.175877	15	1.96048		-0.0838072	15	7.19563
WBGene00021644		-0.239358	7	4.38706		-0.160505	7	2.64653		-0.917394	7	35.0508		-0.77208	7	24.5111		-0.32825	7	1.57381		-0.430976	7	6.97187
WBGene00021636		-0.0493991	14	3.56458		-0.00356096	14	1.50317		0.0804589	14	0.529759		0.0588593	14	0.596679		0.0521546	14	0.329251		-0.0407747	14	4.7418
WBGene00021645		0.0214535	21	3.40259		-0.289457	21	103.25		-0.64302	21	816.188		-0.881022	21	23861.9		0.39753	21	0.00820043		-0.350967	21	184.059
WBGene00021653		0.501375	3	0.233605		-0.912655	3	23.701		-1.96764	3	91.2241		-0.842054	3	5.86088		0.810443	3	0.0636322		-0.24477	3	1.53704
WBGene00021635		-0.29224	16	31.0094		-0.355425	16	74.5012		-0.337791	16	15.1928		-0.482786	16	72.6432		-0.0761859	16	0.951789		0.654612	16	0.0554814
WBGene00004389		0.270186	11	0.37284		-0.0183464	11	1.45614		-0.541733	11	20.7495		-0.419295	11	12.6621		-0.153552	11	1.1274		-0.228832	11	7.92585
WBGene00021634		0.0161052	13	2.05526		-0.262258	13	15.2617		-0.899542	13	394.027		-0.413693	13	19.5268		-0.108124	13	0.995972		-0.267975	13	15.0513
WBGene00021646		0.139298	46	1.78183		0.189727	46	0.0380639		0.79629	46	2.06701e-07		0.83308	46	1.52263e-08		-0.0668923	46	4.43899		0.0778408	46	51.0573
WBGene00021647		0.312879	7	0.34466		-0.291765	7	5.70131		-0.319978	7	2.82844		-0.360336	7	3.74446		-0.0734451	7	0.557126		0.0187887	7	1.44241
WBGene00045399		0.710071	8	0.0452194		0.118512	8	0.509107		0.270992	8	0.216759		-0.64448	8	19.314		-0.59272	8	6.2477		0.276488	8	0.599033
WBGene00003060		-0.165935	92	496352		-0.190071	92	1.40779e+06		-0.347606	92	1.74855e+07		-0.302016	92	1.47371e+07		-0.146797	92	1781.88		0.159566	92	257.966
WBGene00021633		-0.411309	8	12.2741		0.144112	8	0.432193		-0.358967	8	4.02044		-0.371317	8	4.87923		-0.260064	8	1.37745		0.681718	8	0.124876
WBGene00044436		-1.06896	5	74.6479		-1.12925	5	199.5		-2.46977	5	2804.08		-1.84756	5	533.393		-2.20844	5	402.146		-1.85245	5	203.115
WBGene00021648		0	1	0.922923		0.0194976	1	0.737429		0	1	0.592877		0	1	0.573189		-0.139235	1	0.429945		-0.168483	1	0.905223
WBGene00021649		-0.460248	9	20.2451		-0.639481	9	97.0525		-1.73719	9	5168.21		-0.403939	9	7.23805		-1.20767	9	184.371		1.79584	9	0.000983927
WBGene00002144		-0.761253	10	148.884		-0.401836	10	24.3767		-0.412015	10	7.82196		-0.317624	10	5.43523		-0.0254292	10	0.507948		0.52862	10	0.196957
WBGene00002143		-0.16047	12	6.10419		-0.0972046	12	3.04226		-0.314946	12	6.43989		-0.304179	12	7.22878		-0.199591	12	1.66573		-0.336423	12	17.3428
WBGene00021650		-0.686742	10	96.795		-0.428402	10	29.7516		0.658672	10	0.0221185		0.540992	10	0.0319072		-2.00133	10	25835.3		-0.154018	10	4.55733
WBGene00044437		-0.261943	5	3.4073		-0.162487	5	2.03215		-0.285066	5	1.78655		-0.180372	5	1.28495		-0.0190516	5	0.419158		-0.0553215	5	1.39775
WBGene00000284		-0.969002	10	494.556		-0.886599	10	924.701		-0.946601	10	146.485		-0.0760011	10	1.28027		-2.08156	10	40114.4		0.344583	10	0.4594
WBGene00020902		-0.640153	16	523.387		-0.58336	16	874.945		-0.14454	16	3.22753		0.156117	16	0.25848		-1.09362	16	4437.7		-1.78592e-05	16	4.75733
WBGene00020901		0.0827974	3	0.835168		-0.170791	3	1.58978		-0.442265	3	1.94367		-0.582346	3	2.93051		0.0257426	3	0.356731		-0.178259	3	1.34222
WBGene00020900		-1.24451	5	146.097		-0.455876	5	8.17474		-0.780357	5	9.4738		-0.800087	5	12.0807		0.355987	5	0.12929		-0.0371653	5	1.32918
WBGene00000368		-1.0891	14	7360.58		-0.987985	14	21190.9		-0.0963733	14	1.88274		0.0337367	14	0.72727		0.154399	14	0.155085		-0.172597	14	10.551
WBGene00000627		-0.0757589	2	1.21753		-0.158611	2	1.32777		-0.0945771	2	0.74948		0.024325	2	0.564858		-0.464242	2	0.822934		-0.251906	2	1.25465
WBGene00000628		0.0944041	4	0.838377		-1.27032	4	184.309		-0.557932	4	3.41401		-0.271395	4	1.51071		-0.97759	4	5.23314		-1.3003	4	24.1059
WBGene00020903		-0.439283	16	102.38		-0.386665	16	104.421		0.137772	16	0.335779		0.434535	16	0.022147		-0.0369257	16	0.687035		0.143381	16	1.79427
WBGene00004890		-1.32229	16	133415		-0.698839	16	3047.78		-1.85901	16	3.00244e+06		-1.4874	16	514819		-0.516762	16	36.9102		0.69823	16	0.0412418
WBGene00001501		0.388093	4	0.305772		1.25093	4	0.00472186		0.0558154	4	0.559891		0.891494	4	0.0390966		0.00127855	4	0.384755		-0.22493	4	1.81683
WBGene00004272		-0.00951594	6	1.40514		0.0512023	6	0.752285		-0.958055	6	26.778		-1.31276	6	149.29		-0.205929	6	0.848551		-0.166306	6	2.28995
WBGene00017025		-0.473174	21	496.989		-0.103694	21	8.3114		-0.904079	21	11485.3		-0.760578	21	6197.39		-0.237785	21	7.12124		0.385684	21	0.318835
WBGene00017026		-0.732183	18	2280.36		-0.21776	18	23.5638		-0.41201	18	41.9044		-0.385633	18	47.9867		-0.720874	18	413.738		0.0179188	18	5.3395
WBGene00003418		0.99263	16	0.000909639		-0.913725	16	31085.6		-0.0994616	16	2.24874		-0.286993	16	12.9053		0.773313	16	0.000823129		0.585069	16	0.0890263
WBGene00002042		0.0393517	4	1.01286		-0.422373	4	5.26451		-0.30593	4	1.6251		-0.163616	4	1.07669		0	4	0.386069		0.185728	4	0.676924
WBGene00017651		0.0908504	9	1.03943		0.337131	9	0.109558		-1.33892	9	689.333		-1.04491	9	247.474		-0.693759	9	14.01		-0.0898944	9	2.89632
WBGene00017650		0.0133976	12	1.95113		0.17417	12	0.294665		-0.688852	12	68.5667		-0.529248	12	34.3989		-0.834747	12	98.5352		0.767825	12	0.0479508
WBGene00003040		0.429557	38	0.0117022		-0.208656	38	554.273		-0.77346	38	1.45264e+06		-0.607345	38	286414		-0.65597	38	168860		0.958976	38	4.85183e-05
WBGene00001601		0.365734	21	0.105975		-0.129119	21	11.7338		-0.261911	21	17.1932		-0.744746	21	5190.95		-0.558575	21	216.972		0.207728	21	1.48131
WBGene00020467		1.30339	9	0.00151194		0.368452	9	0.0881292		0.823858	9	0.0122244		0.017891	9	0.708182		-1.23762	9	214.25		-0.241213	9	5.498
WBGene00004147		0.609822	23	0.00654869		0.288863	23	0.0324376		-1.64757	23	9.2538e+07		-1.28922	23	8.43302e+06		-0.125016	23	2.52034		0.794936	23	0.00668863
WBGene00020466		-0.611494	8	33.3764		-0.348805	8	10.1225		-0.497475	8	7.64069		-0.00599607	8	0.774895		-0.40206	8	2.62643		-0.430853	8	9.24929
WBGene00021175		1.32802	43	3.83071e-10		0.648976	43	3.39004e-07		1.25553	43	6.80849e-11		1.14048	43	5.76661e-11		0.892068	43	6.88672e-09		1.46866	43	3.1673e-09
WBGene00002135		0.246108	13	0.415498		-0.0852982	13	3.02075		-0.767305	13	161.423		-1.07218	13	2559.47		-0.717565	13	66.4969		0.71354	13	0.0559054
WBGene00002134		0.0492702	13	1.63212		-0.000336878	13	1.3879		-0.658648	13	77.5375		-0.67477	13	134.956		-0.169737	13	1.52301		0.653505	13	0.0787215
WBGene00022815		0.229062	14	0.461512		-0.204417	14	10.5578		-2.05695	14	2.40245e+06		-1.67375	14	505545		0.792028	14	0.00141764		0.596711	14	0.0991255
WBGene00194702		0.243259	2	0.522301		-0.139458	2	1.25144		-0.602033	2	2.17623		-0.626087	2	2.35528		0.332929	2	0.207686		-0.014468	2	0.843638
WBGene00016324		0.585229	12	0.0458309		-0.0219896	12	1.5929		-0.45284	12	15.4069		0.230951	12	0.177123		-0.0592045	12	0.676004		1.11187	12	0.00765104
WBGene00284853		0.706385	2	0.152872		0.0261661	2	0.75004		-0.925973	2	4.29766		-0.855821	2	3.90006		1.29685	2	0.0392975		0	2	0.823481
WBGene00004368		-0.250076	9	6.52431		-0.495488	9	35.6816		-2.24434	9	67212.1		-2.06277	9	67505.9		-0.960283	9	53.322		-0.241432	9	5.5031
WBGene00016323		-0.0208296	15	3.14399		0.226236	15	0.149724		0.658551	15	0.00658246		0.3804	15	0.0411347		-3.13131	15	2.2185e+10		1.04768	15	0.00496154
WBGene00016322		-0.0766084	1	1.09757		-0.0136019	1	0.802101		-0.0495985	1	0.644334		-0.26394	1	0.90293		-0.40707	1	0.602122		0.320792	1	0.477975
WBGene00016321		-0.102645	4	1.64946		0.613394	4	0.0684105		-0.00559016	4	0.670902		-0.214754	4	1.26439		0.231538	4	0.208225		1.13291	4	0.0694335
WBGene00004425		0.306149	4	0.405152		-0.0600036	4	1.15198		-0.0524436	4	0.770191		-0.732484	4	6.43347		0.30854	4	0.169575		1.06444	4	0.0818578
WBGene00004217		1.13484	18	0.000137449		0.230724	18	0.112867		0.0350704	18	0.797534		-0.800757	18	2773.03		0.712651	18	0.00072946		0.147131	18	2.01746
WBGene00016325		0.657808	10	0.0408852		0.544113	10	0.0202173		-0.683786	10	34.6909		-0.507027	10	16.8823		0.246206	10	0.114502		0.492591	10	0.232477
WBGene00016320		1.0962	4	0.0268685		0.869819	4	0.0233425		-1.43964	4	45.8382		-0.4355	4	2.53011		1.59476	4	0.00549356		0.459584	4	0.350431
WBGene00006751		-0.0710258	11	3.06004		-0.128615	11	3.53817		-0.707278	11	55.136		-0.581735	11	36.1456		-0.107831	11	0.858718		0.0475811	11	2.00735
WBGene00016326		0.261006	52	0.13627		-0.241838	52	15080		-0.79257	52	3.62391e+08		-0.51405	52	2.47216e+06		-0.433079	52	62667.2		0.469083	52	0.0366532
WBGene00003797		0.430096	15	0.0962204		0.257715	15	0.108413		0.360365	15	0.0633507		0.759658	15	0.00173222		0.54964	15	0.00667305		0.810083	15	0.0228816
WBGene00006833		0.199177	14	0.574735		-0.302864	14	27.4478		-0.826271	14	353.118		-1.61844	14	326967		-0.895231	14	352.427		-1.0359	14	1986.44
WBGene00018765		-0.00544859	2	1.01034		-0.257815	2	1.80422		-0.612165	2	2.22305		-0.610994	2	2.27852		-0.267927	2	0.586285		0	2	0.823481
WBGene00044423		-1.0904	5	81.0291		-0.925003	5	75.7001		-1.17532	5	35.8321		-0.48295	5	3.83758		-2.99261	5	4703.68		0	5	1.19913
WBGene00018764		0.403158	13	0.139473		-0.538322	13	191.018		-1.20476	13	3090.67		-1.29196	13	13029.4		0.121598	13	0.20441		-1.35087	13	7222.91
WBGene00018763		0.146169	6	0.728921		-0.367391	6	6.90365		-0.414287	6	3.4086		-0.373463	6	3.2045		-0.401844	6	1.71981		0.177867	6	0.777971
WBGene00020187		0.755829	10	0.0232045		-1.02547	10	2620.34		0.797482	10	0.0103358		0.656315	10	0.0160027		-0.978833	10	94.7825		1.38212	10	0.00387732
WBGene00020188		-0.228346	6	3.53486		0.0886617	6	0.616924		-1.00208	6	31.6419		-0.823243	6	20.1653		-0.78603	6	6.8725		0.667225	6	0.167617
WBGene00020192		0.493333	3	0.239394		-0.737612	3	12.5284		-0.870939	3	5.7327		-0.357224	3	1.60698		-0.191568	3	0.575005		0.40228	3	0.411176
WBGene00020189		0.144054	17	0.914044		-0.083649	17	4.34091		-0.467693	17	54.351		-0.157264	17	4.59963		-1.18485	17	16887.2		0.2796	17	0.727004
WBGene00020190		0.0349489	7	1.23996		-0.116181	7	2.04234		0.12662	7	0.430886		-0.366165	7	3.8454		0	7	0.413007		0.158162	7	0.885217
WBGene00001832		1.15898	14	0.000500365		0.493432	14	0.0120862		0.0882378	14	0.501017		-0.364592	14	16.7707		0.0440005	14	0.349624		0.000833453	14	3.68389
WBGene00020185		1.46939	9	0.000618168		-0.0356024	9	1.46061		-0.0493458	9	1.01271		-0.0487275	9	1.02228		-0.995737	9	63.6975		-0.337634	9	8.27133
WBGene00000764		1.75243	6	0.000835236		0.903806	6	0.00823249		-0.000828062	6	0.71105		-0.125701	6	1.16337		-1.25165	6	36.8362		-1.00905	6	32.2025
WBGene00020191		0.444879	5	0.22816		0.574702	5	0.0615178		-2.63765	5	4935.87		-1.72578	5	343.404		0.259867	5	0.174777		0.964369	5	0.0828962
WBGene00020184		-0.0997404	10	3.2562		0.000699028	10	1.19067		0.668457	10	0.0209635		0.218057	10	0.220351		-0.124363	10	0.873917		1.37073	10	0.00408601
WBGene00020193		1.02441	4	0.0343808		-0.368494	4	4.1999		-1.73032	4	107.918		-0.0216053	4	0.689099		-1.4645	4	19.1702		1.96528	4	0.00938602
WBGene00016837		0.532964	24	0.013218		-1.0607	24	2.40681e+07		0.173491	24	0.186695		0.780542	24	7.40537e-05		-1.28134	24	3.11181e+06		0.19265	24	1.98809
WBGene00016836		0.187038	33	0.664767		0.519361	33	0.000102239		0.0215382	33	1.34047		0.186102	33	0.0856993		-0.157914	33	9.70055		0.888095	33	0.000378179
WBGene00000013		0.125493	1	0.69482		-0.0104396	1	0.795685		-0.907277	1	2.71753		-0.359277	1	1.064		0	1	0.360888		2.01545	1	0.0523325
WBGene00000012		-0.253562	3	2.3248		-0.0949186	3	1.20594		-0.753806	3	4.26586		-0.532295	3	2.56407		0	3	0.377486		0.880602	3	0.155131
WBGene00016838		0.052543	6	1.08168		-0.456242	6	11.0515		-0.825737	6	16.216		-0.988873	6	39.6988		-0.777832	6	6.67231		0.405582	6	0.380846
WBGene00016835		0.112656	11	0.985354		0.259162	11	0.155899		-0.736391	11	65.4748		-1.51772	11	15239.2		-0.257376	11	2.09197		0.323106	11	0.510646
WBGene00016839		-0.0138909	12	2.33362		0.286129	12	0.112471		-0.916296	12	289.05		-0.164198	12	2.73973		-1.38786	12	3441.13		0.970886	12	0.016231
WBGene00001430		0.627004	11	0.0412579		-1.99184	11	1.15846e+07		-0.666794	11	43.4152		-0.158647	11	2.35255		-2.2532	11	303040		0.435399	11	0.292297
WBGene00016840		-1.42188	4	153.109		-1.69167	4	1078.63		-3.19333	4	8029.81		-1.84823	4	214.361		-0.393752	4	1.10319		-0.561562	4	4.08129
WBGene00016841		0.0534144	11	1.42009		0.160985	11	0.343667		-0.872856	11	146.536		-0.576697	11	34.9887		-0.0835052	11	0.742929		0.0948295	11	1.58736
WBGene00003950		0.148383	5	0.709214		-1.45699	5	944.595		-1.17184	5	35.4152		-0.617034	5	6.23195		-0.136665	5	0.606137		-1.18885	5	32.3072
WBGene00020625		0.0855706	4	0.864201		0.402936	4	0.165343		-1.50879	4	56.1947		-1.17269	4	25.6572		0	4	0.386069		1.53383	4	0.0264826
WBGene00077599		0.0729375	4	0.902521		0.365113	4	0.193761		0.0393653	4	0.58769		0.201831	4	0.341467		0	4	0.386069		0.41335	4	0.39163
WBGene00020626		0.0411848	9	1.35834		-0.201708	9	4.63266		1.56166	9	0.0002927		1.1747	9	0.00120725		-0.754118	9	18.9625		-0.434145	9	12.4483
WBGene00020627		0.152546	3	0.675425		0.0735687	3	0.652868		-0.638174	3	3.18638		-0.680556	3	3.80869		-0.0346166	3	0.407312		0.0272445	3	0.882969
WBGene00020628		0.563779	17	0.0256499		-0.159874	17	10.3179		-0.935521	17	2816.52		-0.939146	17	6611.61		-0.418692	17	20.3561		-0.0743017	17	9.18246
WBGene00020629		0.0845844	7	0.986524		-0.0701912	7	1.56082		-1.09101	7	72.8409		-0.86923	7	38.1845		-0.555437	7	3.97252		-0.332174	7	4.93213
WBGene00020653		0.579926	4	0.158225		0.613152	4	0.0684798		-0.354112	4	1.87292		-0.392749	4	2.21206		0.410288	4	0.12928		-0.664571	4	5.22818
WBGene00020652		1.7437	14	6.83945e-06		0.388538	14	0.0334499		0.733526	14	0.00490028		0.523507	14	0.0153455		-0.807754	14	185.07		-0.645375	14	185.801
WBGene00003072		0.88537	105	8.05516e-14		0.0080699	105	72.7156		0.0575035	105	1.76668		0.203091	105	0.00103042		0.247617	105	1.53047e-05		0.602734	105	1.60488e-05
WBGene00018528		-0.0383855	6	1.587		-0.267824	6	4.07467		-0.18713	6	1.44082		0.134462	6	0.401464		-0.359111	6	1.47421		0.329457	6	0.483565
WBGene00018529		0.723383	7	0.0520179		-0.628529	7	40.84		0.770537	7	0.0285841		0.859381	7	0.0143291		1.25809	7	0.00245004		0.176272	7	0.830803
WBGene00018527		0.192349	3	0.598363		-0.220172	3	1.90303		0.472236	3	0.193429		0.226032	3	0.338826		0.486219	3	0.129721		-0.000127914	3	0.933621
WBGene00018530		0	8	1.57163		-0.00309843	8	1.10844		0	8	0.761318		0	8	0.751843		0	8	0.422398		0	8	1.74614
WBGene00018531		0.0508071	7	1.15261		-0.352717	7	8.14225		1.20014	7	0.00467773		0.62109	7	0.0425061		0	7	0.413007		0.227179	7	0.695104
WBGene00018526		0	2	0.995846		0	2	0.813222		0.799037	2	0.114691		0.569378	2	0.17072		0	2	0.369094		0.129622	2	0.663063
WBGene00018525		0	8	1.57163		0	8	1.08669		0	8	0.761318		0	8	0.751843		0	8	0.422398		0	8	1.74614
WBGene00017909		-0.45857	11	33.4249		-0.0145381	11	1.41217		-0.305315	11	5.13899		-0.28241	11	5.23147		-0.242692	11	1.91683		-0.174984	11	6.06534
WBGene00017910		0	4	1.15943		0	4	0.895724		0	4	0.659945		0	4	0.643867		0	4	0.386069		0	4	1.05794
WBGene00000197		0.215345	21	0.482303		0.639739	21	0.000347199		-0.539623	21	286.395		-0.562126	21	672.219		-0.0529428	21	0.99437		0.10992	21	3.44578
WBGene00000779		-0.981478	5	53.4195		-1.02073	5	119.216		-0.0962609	5	0.945872		-0.246945	5	1.63468		-0.047452	5	0.458205		1.88235	5	0.00651654
WBGene00017908		0.485929	6	0.174029		0.13196	6	0.490515		-0.740782	6	11.7512		-0.209122	6	1.63636		-0.0660418	6	0.512406		-0.99329	6	30.649
WBGene00006805		0.251151	108	0.0492452		-0.187266	108	1.37172e+07		-0.533642	108	1.99457e+12		-0.576718	108	481100818159151		-0.00638806	108	5.5596		-0.0187974	108	1.03066e+06
WBGene00018868		0.347898	2	0.395694		-0.604094	2	5.26164		-0.974129	2	4.75514		-1.871	2	36.2196		0	2	0.369094		-0.290646	2	1.33859
WBGene00006820		0.351027	203	1.81955e-06		0.185256	203	9.24244e-06		-0.155211	203	5.93301e+08		-0.15757	203	6.64668e+09		0.109477	203	0.000910327		0.362652	203	0.0980359
WBGene00015631		-0.23522	4	2.60064		0.112457	4	0.558957		-0.126883	4	0.95902		-0.269496	4	1.50172		0.0606927	4	0.328382		0.343566	4	0.463168
WBGene00016066		0.325189	13	0.239801		0.177655	13	0.272123		-1.04653	13	1062.45		-0.664374	13	124.957		-0.0888213	13	0.87188		0.466579	13	0.228508
WBGene00016064		0.0625757	10	1.27457		0.0804513	10	0.654659		-0.564534	10	18.045		-0.794295	10	94.1823		-0.282587	10	2.08134		0.100236	10	1.41433
WBGene00016063		0.673446	10	0.0373524		0.276744	10	0.150185		-0.435751	10	8.90872		-0.0195411	10	0.91322		-0.288704	10	2.15235		0.189948	10	0.935945
WBGene00000867		0.462612	8	0.15573		0.733415	8	0.00995995		0.0737276	8	0.540916		-0.36058	8	4.62237		0.177079	8	0.188876		1.31909	8	0.0106022
WBGene00019254		0.537811	5	0.159904		-0.649413	5	20.4763		-1.5927	5	146.155		-1.60267	5	220.023		-1.27424	5	21.4767		-0.135531	5	1.74557
WBGene00019253		0.0519876	2	0.86755		0.531908	2	0.157107		0.202616	2	0.401453		0.0664352	2	0.514981		-0.0475114	2	0.400659		0.0550213	2	0.751123
WBGene00003029		-0.844006	11	360.38		0.645438	11	0.00695281		-1.18566	11	928.773		-0.162853	11	2.41732		-1.03179	11	210.426		-0.0352634	11	3.02955
WBGene00002696		-0.613356	14	223.917		-1.87569	14	1.16848e+08		-0.181432	14	3.4649		-0.560035	14	78.2067		-1.31584	14	7800.13		0.184023	14	1.21229
WBGene00017085		0.858872	10	0.0127931		0.505233	10	0.0270625		-0.714158	10	40.974		-0.306562	10	5.08711		-0.806853	10	36.9054		2.24259	10	7.39227e-05
WBGene00017087		-0.0123355	5	1.31148		0.382555	5	0.153079		-1.0628	5	24.5288		-1.7556	5	382.51		-1.33127	5	25.6832		0.2998	5	0.522572
WBGene00017088		-0.291395	10	9.85571		-0.688562	10	209.378		-1.9072	10	28333.9		-2.37701	10	1.22193e+06		-1.00252	10	107.931		-1.21667	10	606.128
WBGene00017084		1.07253	14	0.00094393		0.152102	14	0.331837		-0.405857	14	17.3228		-0.853202	14	787.583		-1.31926	14	7998.81		0.718623	14	0.0473097
WBGene00017089		0.945459	7	0.0187015		0.619817	7	0.0276234		-0.48777	7	5.73551		-0.710725	7	18.5256		-0.216209	7	0.996876		0.519909	7	0.249286
WBGene00077701		0.265512	7	0.428697		0.392288	7	0.104477		0.0147334	7	0.690387		-0.647006	7	13.8515		-0.910528	7	16.8876		-0.519058	7	9.49196
WBGene00017090		0.158066	2	0.654751		-0.0354747	2	0.907463		-0.782124	2	3.17688		-0.99358	2	5.27729		-0.111159	2	0.447216		0	2	0.823481
WBGene00020040		0.856268	1	0.133017		0.285827	1	0.374939		0.158283	1	0.45458		0.836446	1	0.135788		-0.163594	1	0.443318		1.08063	1	0.17729
WBGene00020039		1.79634	3	0.00453689		1.73986	3	0.00151077		-1.97385	3	92.6657		-2.22686	3	236.074		-0.983172	3	3.27281		1.51971	3	0.0421762
WBGene00020032		0.0609347	2	0.8472		-1.01898	2	18.9689		-0.982733	2	4.84187		-0.927	2	4.55967		-0.678644	2	1.19176		0	2	0.823481
WBGene00020033		0.809652	5	0.05653		-0.529761	5	11.6068		-0.317119	5	1.99022		-1.0816	5	33.4339		-2.27738	5	499.208		-2.94616	5	4204.31
WBGene00020034		-0.38606	10	17.0318		-0.245549	10	7.54918		-0.265211	10	3.49846		0.0192943	10	0.723855		-0.047309	10	0.57271		0.5189	10	0.205967
WBGene00002137		-0.0440387	6	1.62528		-0.62879	6	27.5584		-1.40663	6	146.645		-1.05021	6	51.018		-0.158008	6	0.713892		-0.0147799	6	1.42365
WBGene00002138		0.463573	12	0.101801		0.203641	12	0.228677		-0.511924	12	22.3892		-0.528862	12	34.307		0.666089	12	0.00640464		0.493462	12	0.207224
WBGene00002139		0.700371	8	0.0474652		-0.173004	8	3.28707		-0.45836	8	6.37355		-0.918979	8	76.9691		0.188364	8	0.179433		0.3191	8	0.507977
WBGene00020035		1.56077	14	2.61967e-05		0.477421	14	0.014118		-0.0755369	14	1.62143		0.0367237	14	0.710356		-0.295558	14	4.26029		0.0360764	14	2.97469
WBGene00020036		0.67878	5	0.0932575		-0.703191	5	26.4278		-0.370261	5	2.38034		-0.746526	5	9.9536		1.14431	5	0.0109108		-1.23429	5	36.6412
WBGene00020037		-0.781409	9	114.239		-0.293846	9	8.78815		-0.731377	9	31.8986		-0.0200618	9	0.87291		0.191289	9	0.165529		0.929964	9	0.0385275
WBGene00004464		0.396003	9	0.200798		-0.511047	9	39.7556		-1.10549	9	211.657		-0.054802	9	1.05707		-2.9904	9	1.40718e+06		-0.321151	9	7.71353
WBGene00020038		-0.0130959	4	1.21277		0.450106	4	0.135671		-1.14353	4	19.1607		-1.03893	4	16.8525		-1.76878	4	43.1522		0.669796	4	0.211405
WBGene00020031		0.375448	12	0.181475		0.799715	12	0.001356		-0.136075	12	2.07713		-0.160438	12	2.66926		-1.86594	12	74210.7		0.264802	12	0.701781
WBGene00020030		-0.147849	16	9.59681		0.460383	16	0.0110445		0.491185	16	0.0197565		0.932831	16	0.000272559		-0.38003	16	11.8611		1.5016	16	0.000174934
WBGene00004093		0.946273	35	5.00233e-06		0.168799	35	0.110325		0.710241	35	2.24695e-05		0.646737	35	2.11134e-05		0.145769	35	0.0629245		1.22366	35	2.50431e-06
WBGene00015975		0.0936905	7	0.945998		-0.825911	7	129.503		-0.902584	7	32.9305		-0.66587	7	15.0966		-0.0835695	7	0.580595		0.502939	7	0.264554
WBGene00015974		-0.218892	12	8.9551		-0.229287	12	9.47687		-0.189509	12	2.91249		-0.326559	12	8.44173		-0.171562	12	1.39126		0.0455299	12	2.26053
WBGene00015973		0	2	0.995846		-0.315951	2	2.15939		-0.112926	2	0.778933		-0.268616	2	1.07456		-0.0201834	2	0.382187		1.17637	2	0.115259
WBGene00015972		0.41501	20	0.0703012		0.0274526	20	1.35757		-0.0528918	20	1.95297		-0.419021	20	106.869		0.0522957	20	0.324831		-0.169633	20	31.9024
WBGene00001985		0.319939	3	0.405799		-0.0387423	3	0.982814		-0.124592	3	0.872006		-0.40131	3	1.80763		-0.231209	3	0.627324		0.237864	3	0.574831
WBGene00015971		0.328054	10	0.274864		0.33814	10	0.0947635		-0.181204	10	2.20758		-0.491638	10	15.3971		0.495126	10	0.0292355		0.064555	10	1.66673
WBGene00015970		0.689596	13	0.0190474		-0.312304	13	24.1301		1.04645	13	0.000780148		0.397856	13	0.0479602		1.8149	13	1.74211e-06		2.41122	13	3.50101e-06
WBGene00015976		0.51666	3	0.222986		-1.39621	3	137.92		-0.550973	3	2.55708		-1.15123	3	13.3759		-0.152304	3	0.527485		0.619526	3	0.264094
WBGene00003516		0.00813666	29	6.9703		-0.615388	29	190565		-0.337121	29	153.183		-0.48978	29	2608.26		0.435861	29	0.00126885		0.322304	29	0.583702
WBGene00016605		0.315335	14	0.244972		-0.291013	14	24.4657		-0.286469	14	7.35883		0.854079	14	0.00113489		-2.01366	14	1.32915e+06		1.07199	14	0.00554424
WBGene00003584		0.0996893	15	1.23816		-0.303243	15	34.1722		0.207927	15	0.201588		-0.327706	15	15.2257		-0.633912	15	70.8747		0.195808	15	1.19072
WBGene00016606		-0.114564	13	5.09695		-0.196038	13	8.32439		-1.18398	13	2686.41		-1.14957	13	4539.63		-0.9636	13	362.565		-0.500826	13	56.7657
WBGene00007001		0.481221	10	0.11343		-1.48823	10	84273		-1.6166	10	5762.23		-1.59403	10	11279.1		-0.59274	10	11.405		-0.555786	10	28.9532
WBGene00016608		0.186904	11	0.623246		0.128333	11	0.447006		-0.713155	11	57.0824		-0.907444	11	296.131		-0.808	11	55.5134		0.036189	11	2.12425
WBGene00016609		0.400726	7	0.229957		-0.663325	7	50.0542		-0.693673	7	13.6563		-0.775867	7	24.9383		-1.74424	7	504.915		-0.243185	7	3.61118
WBGene00016603		-0.449831	38	28393.4		-0.0163358	38	6.73416		-1.02898	38	1.21138e+08		-1.39419	38	1.07905e+12		-0.663488	38	194255		-0.401271	38	29081.2
WBGene00016602		-0.243902	9	6.31085		-0.328198	9	11.1576		-0.974744	9	109.245		-1.21868	9	644.724		-1.49628	9	783.912		0.464058	9	0.277221
WBGene00016607		0.09257	3	0.810692		-0.44873	3	4.37483		-0.202934	3	1.06259		-0.648602	3	3.49734		0.169545	3	0.260101		0.0106192	3	0.913396
WBGene00000382		0.0726074	10	1.20278		0.826225	10	0.00243667		-1.43439	10	2122.63		-0.63066	10	35.3772		0.285298	10	0.0924059		0.317366	10	0.520701
WBGene00016601		-0.104604	15	6.00891		0.209813	15	0.177193		-0.670661	15	159.179		-1.0998	15	9616.99		-0.924616	15	690.871		1.28791	15	0.00105781
WBGene00021631		0.0451938	2	0.883328		0.146467	2	0.517127		-0.154265	2	0.849596		-0.0805971	2	0.711168		-0.0185034	2	0.38108		0	2	0.823481
WBGene00021630		0.316543	6	0.355422		0.406661	6	0.114521		-0.434825	6	3.68457		0.144024	6	0.386068		-0.103101	6	0.585664		1.1351	6	0.0386317
WBGene00021632		-0.173216	6	2.80178		-1.11418	6	360.233		-1.34853	6	117.656		-1.03591	6	48.1199		-0.0348188	6	0.457846		0.0429055	6	1.18801
WBGene00021629		0.0751758	14	1.42831		-0.356667	14	46.2674		-1.20001	14	5150.77		-1.21972	14	14135.5		-0.876713	14	307.505		-0.657697	14	200.224
WBGene00021628		-0.743454	18	2521.1		0.0500659	18	0.970459		-0.834641	18	1772.88		-0.978267	18	15715.4		-0.813935	18	977.786		-0.247593	18	39.4523
WBGene00303090		0.0162271	1	0.889658		-0.0831906	1	0.957161		0.0294744	1	0.564266		-0.0361805	1	0.61003		-0.0812003	1	0.399685		-0.000522332	1	0.727018
WBGene00000140		0.370226	212	2.06483e-07		0.028058	212	738.754		-0.0370286	212	32153.3		-0.0885424	212	1.6543e+07		0.0164081	212	7.98843		0.554022	212	2.6888e-08
WBGene00000045		0.208395	11	0.545857		-0.478756	11	59.3075		-0.581844	11	26.2933		-0.0689537	11	1.31826		-0.0836313	11	0.743487		0.210623	11	0.892948
WBGene00022833		0	2	0.995846		0	2	0.813222		-0.0256854	2	0.648502		-0.00973541	2	0.608713		0	2	0.369094		0	2	0.823481
WBGene00022834		0.384382	7	0.247939		0.25625	7	0.231446		-0.457253	7	5.0435		-0.213331	7	1.91453		-0.773536	7	9.66264		-0.118054	7	2.32958
WBGene00022832		0.651581	15	0.0173588		0.998812	15	5.4215e-05		0.452768	15	0.0314066		0.101057	15	0.424047		-3.4576	15	2.85768e+11		-0.052127	15	5.86884
WBGene00022835		0.0754944	6	0.981921		-0.936986	6	140.947		-1.65604	6	377.46		-2.04151	6	2939.95		-0.0410464	6	0.468243		0.357285	6	0.443144
WBGene00003061		-1.23316	5	139.892		-0.326637	5	4.42773		-2.01962	5	615.615		-1.27166	5	66.4751		-0.23648	5	0.828936		-0.326681	5	2.96435
WBGene00022831		0.390588	30	0.0414192		0.0473349	30	1.30897		0.221112	30	0.07675		0.290236	30	0.0198765		-1.43534	30	1.30261e+09		0.717584	30	0.00526789
WBGene00022836		0.320518	9	0.30157		-0.250351	9	6.49579		-0.874188	9	65.6901		-0.386451	9	6.5731		-0.701634	9	14.5744		-1.12539	9	232.639
WBGene00022830		-0.139339	13	6.05477		0.0529787	13	0.851933		-0.151748	13	2.53445		0.119463	13	0.376813		-0.582544	13	26.2164		1.91023	13	6.08956e-05
WBGene00000962		1.02905	98	1.66178e-15		0.619519	98	7.19044e-14		0.0662995	98	1.12058		0.0847166	98	0.434149		-0.0289914	98	12.4147		1.62255	98	1.51552e-21
WBGene00020655		-0.0208629	5	1.35497		-0.0627725	5	1.26619		0.274421	5	0.271394		1.00081	5	0.0179455		-0.114572	5	0.565561		0.38004	5	0.418409
WBGene00015704		-0.0539172	28	14.3504		0.268372	28	0.0266239		-0.2851	28	64.8901		-0.408054	28	607.925		-0.134611	28	4.32374		0.0674079	28	10.0557
WBGene00020656		-0.0143951	2	1.03461		0.262807	2	0.360933		-0.583497	2	2.09313		-0.548519	2	1.9865		0	2	0.369094		0	2	0.823481
WBGene00195180		-0.27159	3	2.45593		0.0804147	3	0.636791		-0.938656	3	6.80084		-0.413425	3	1.86703		0	3	0.377486		-0.919632	3	6.08079
WBGene00016562		-0.0239287	46	45.454		-0.195708	46	1436.79		-0.647498	46	1.94888e+06		-0.648113	46	9.97113e+06		-0.282671	46	556.836		0.386595	46	0.210239
WBGene00001231		-0.432982	6	8.37596		-1.63339	6	5632.23		-2.1242	6	2226.37		-2.56729	6	25244.7		-1.99512	6	537.709		-2.51698	6	3648.52
WBGene00000787		0.41598	8	0.196595		0.876246	8	0.00399383		-1.39125	8	481.465		-1.29959	8	523.433		-0.0876674	8	0.629176		-0.400485	8	8.22388
WBGene00016567		-0.199003	7	3.64285		-1.17329	7	987.069		-1.41683	7	287.448		-2.17367	7	14688		-1.22971	7	62.0172		0.162264	7	0.872588
WBGene00016564		-0.248287	8	5.43491		-1.19066	8	2210.25		-0.341656	8	3.71041		-0.468273	8	7.95123		-0.169995	8	0.914708		3.61682	8	1.45936e-06
WBGene00016566		-0.0434002	18	4.94817		-0.293146	18	57.831		-0.341079	18	22.3508		-0.402403	18	56.5321		-0.0536732	18	0.868541		-0.322469	18	69.3453
WBGene00016561		0.616707	49	8.34914e-05		0.349542	49	0.000312402		0.577342	49	1.02709e-05		0.711554	49	1.02252e-07		0.0553351	49	0.284484		0.333947	49	0.54111
WBGene00016565		1.76467	20	1.47826e-07		0.731924	20	0.000141838		2.18475	20	7.21624e-10		2.39378	20	8.59061e-12		-0.0423217	20	0.851182		0.827255	20	0.0084238
WBGene00271778		0.0642106	2	0.839869		0.604921	2	0.125368		0.00198469	2	0.611883		-0.13978	2	0.809837		0	2	0.369094		0.136665	2	0.655303
WBGene00020131		-0.0380883	79	1209.89		-0.308604	79	4.24763e+07		-0.570748	79	3.70061e+09		-0.501555	79	3.10683e+09		-0.569874	79	4.97609e+09		0.0906667	79	847.853
WBGene00022470		-0.0778635	6	1.87437		-0.114272	6	1.80695		-0.700868	6	10.1012		-0.590844	6	7.79554		0	6	0.403825		-0.140082	6	2.10912
WBGene00022471		-0.101631	12	4.14953		-0.0501344	12	2.02927		-0.868169	12	213.183		-0.77747	12	192.183		-0.0222377	12	0.533111		-0.30505	12	14.6702
WBGene00022472		0.359075	4	0.337814		-0.119061	4	1.47569		-0.607999	4	3.95654		-0.907752	4	11.1594		0.110768	4	0.287336		-0.229887	4	1.83861
WBGene00044754		0.0126327	3	1.034		0.00901339	3	0.825914		-0.215125	3	1.09578		-0.217368	3	1.10639		0.230548	3	0.227478		0	3	0.933378
WBGene00022473		0.0263957	10	1.57094		-0.118854	10	2.91886		-0.21201	10	2.61362		-0.228537	10	3.18937		0	10	0.441824		0.0850734	10	1.51655
WBGene00022474		0.00214604	4	1.15092		0.0651619	4	0.681566		-1.00136	4	12.6049		-1.16875	4	25.3418		0	4	0.386069		0.0893522	4	0.853429
WBGene00022469		-0.0800309	9	2.61001		0.507262	9	0.0335891		-0.278767	9	3.23204		0.0339101	9	0.648351		-0.290682	9	1.85596		0.0857994	9	1.3761
WBGene00044441		-1.32155	2	33.1758		-0.197206	2	1.496		-1.69306	2	21.5295		-2.31371	2	95.7245		-2.8933	2	54.627		-1.5261	2	10.5564
WBGene00022467		0.71084	12	0.0201047		0.110513	12	0.509509		1.15833	12	0.000577209		1.20796	12	0.000202944		-1.71452	12	28055.7		1.8855	12	0.000123411
WBGene00022475		0.700069	8	0.0475369		-0.493896	8	25.6113		-0.667991	8	16.8435		-0.596486	8	15.1667		-0.143988	8	0.812729		-0.145613	8	3.06743
WBGene00017010		-0.104608	21	12.119		-0.268043	21	77.2235		-0.73267	21	2023.69		-0.722728	21	4057.11		-0.0261116	21	0.7472		-0.568805	21	1206.53
WBGene00004113		-0.567903	6	14.7931		-0.363485	6	6.76233		0.342295	6	0.19365		-0.381753	6	3.31501		-1.17831	6	28.2765		0.282816	6	0.559749
WBGene00017009		0.373631	8	0.242929		-0.80557	8	188.123		-0.465173	8	6.57807		-0.409928	8	5.92666		0.0068472	8	0.409454		0.413357	8	0.352734
WBGene00000440		0.226081	5	0.526872		0.48273	5	0.0951715		-0.327701	5	2.06244		0.00257454	5	0.66311		-0.31393	5	1.05684		-0.203546	5	2.10752
WBGene00000629		-0.624891	4	9.9147		0.529792	4	0.0971338		-1.40824	4	41.7881		-2.02429	4	372.752		-2.25861	4	159.31		-1.29963	4	24.067
WBGene00017001		0.236566	7	0.489846		0.19048	7	0.339982		-1.20767	7	119.081		-0.51543	7	7.59882		0.0135671	7	0.39079		-0.679752	7	16.666
WBGene00044421		0.0247601	1	0.872649		-0.00459126	1	0.783954		0.0477716	1	0.547204		-0.325315	1	1.00357		0	1	0.360888		0.0546986	1	0.676461
WBGene00017002		0.357175	5	0.319104		-0.0571818	5	1.23304		0.390417	5	0.183621		-1.24697	5	60.7967		0.00491106	5	0.388812		1.31572	5	0.0313178
WBGene00017003		1.07261	11	0.00263994		-0.0334977	11	1.64507		-0.0730451	11	1.30432		0.328043	11	0.101544		0.735961	11	0.00564826		0.11883	11	1.40893
WBGene00004479		0.49898	3	0.235315		-0.891774	3	21.9653		-0.761429	3	4.3487		-0.421299	3	1.90668		0	3	0.377486		0.735254	3	0.20861
WBGene00004436		0.785735	4	0.0780384		0.395656	4	0.170469		-0.614675	4	4.03512		-0.454982	4	2.68985		-0.717392	4	2.61481		0.224252	4	0.617044
WBGene00017007		-0.232252	10	7.00266		-0.0664722	10	1.97057		-0.757537	10	51.9713		-0.661516	10	42.551		-0.118915	10	0.848191		-0.0668752	10	3.05172
WBGene00045048		-1.89979	4	790.348		1.10254	4	0.00879718		-0.529171	4	3.13669		0.425641	4	0.169008		0.375593	4	0.141811		-0.360257	4	2.51543
WBGene00017006		0.122565	5	0.782827		-0.0711712	5	1.31766		-0.959838	5	17.3407		-0.316081	5	2.09897		0.208847	5	0.205104		0.0983588	5	0.913104
WBGene00017004		0.256475	22	0.311059		0.667651	22	0.000172717		-0.174722	22	7.93238		-0.538954	22	695.902		-0.634441	22	670.668		0.346815	22	0.445146
WBGene00017011		-0.0765402	6	1.86395		0.239798	6	0.277104		0.1774	6	0.361812		-0.136893	6	1.21785		-0.765396	6	6.37974		-0.268501	6	3.15533
WBGene00017005		-0.0236036	1	0.973544		0.0313665	1	0.715532		0.0480339	1	0.546963		0.0616973	1	0.515424		0	1	0.360888		0	1	0.726523
WBGene00016654		0.0064591	14	2.36545		-0.190212	14	9.1982		-0.974142	14	1019.62		-0.326866	14	12.4587		0.218084	14	0.0970331		1.12561	14	0.00400459
WBGene00016650		0.264756	91	0.0430778		-0.195472	91	1.60089e+06		0.0327091	91	4.02935		-0.0185821	91	42.7659		-0.240158	91	94634.1		0.353163	91	0.316917
WBGene00016653		0.894329	6	0.0311093		-0.395223	6	7.99998		-0.215051	6	1.60167		0.326262	6	0.183229		-0.173879	6	0.755941		0.658562	6	0.172234
WBGene00016655		-0.597186	5	12.2833		-0.20931	5	2.53767		-0.527713	5	4.04537		-0.900677	5	17.3804		-0.594715	5	2.54944		-0.917836	5	15.2478
WBGene00016652		-0.839433	11	350.356		-0.436141	11	42.0822		-0.316354	11	5.48504		-0.139456	11	2.07836		-0.272046	11	2.28291		0.0793736	11	1.71405
WBGene00022466		-0.240059	10	7.32582		-0.533889	10	65.6317		-0.539542	10	15.7351		-0.0719108	10	1.24931		-0.19645	10	1.29769		0.310338	10	0.537817
WBGene00015008		0.0558929	5	1.01023		-1.062	5	145.003		-2.10763	5	828.05		-1.2922	5	71.5997		-0.254044	5	0.875878		-0.849328	5	12.6119
WBGene00004415		-0.016302	3	1.12919		-0.559877	3	6.55792		-1.83847	3	65.8518		0.990001	3	0.0441045		-0.112417	3	0.483232		-0.220217	3	1.46203
WBGene00015011		-0.923716	8	158.868		-0.710862	8	102.633		-0.0809207	8	1.10786		-1.66851	8	3356.23		-3.07074	8	486623		-1.70101	8	1260.54
WBGene00015009		0.0286332	5	1.12126		0.301864	5	0.224479		-0.0625383	5	0.844312		-0.210602	5	1.43337		-0.322676	5	1.08623		-0.0776966	5	1.48714
WBGene00303032		-0.095921	1	1.14658		0	1	0.774865		-0.369421	1	1.10203		0.326215	1	0.326872		0	1	0.360888		0.575614	1	0.342734
WBGene00015010		-0.546891	3	5.677		-0.867122	3	20.0791		-1.28132	3	16.1455		-2.58655	3	616.538		-0.865187	3	2.52554		-0.914975	3	6.02336
WBGene00015007		-0.35303	29	820.38		-0.225382	29	172.155		-0.928809	29	453476		-1.05946	29	1.32737e+07		-1.81391	29	1.51745e+11		-0.394995	29	2333.12
WBGene00206362		1.35808	20	7.58604e-06		1.04104	20	2.54078e-06		1.4411	20	9.84064e-07		1.5135	20	1.07669e-07		3.26698	20	1.9838e-15		2.40764	20	1.78946e-08
WBGene00015006		0.132752	2	0.700231		0.0303455	2	0.740413		-0.953678	2	4.55519		-1.33522	2	11.1721		-0.185932	2	0.508867		0.258639	2	0.534436
WBGene00006961		0.600306	29	0.00280556		-0.3768	29	2616.88		-0.146027	29	11.5902		-0.0897617	29	6.51098		0.0642739	29	0.268275		1.05506	29	0.000122137
WBGene00006791		-0.0422147	9	2.1289		0.0424626	9	0.849059		-0.839452	9	55.1051		-0.590695	9	20.2555		0.151086	9	0.202504		0.718388	9	0.0944007
WBGene00020212		0.629881	13	0.0288466		0.781731	13	0.00107971		0.12051	13	0.403595		0.138721	13	0.326737		0.470793	13	0.0184108		0.318708	13	0.5309
WBGene00007053		0.237116	54	0.223974		0.366465	54	8.87001e-05		-0.499737	54	660218		-0.282073	54	8631.23		0.687024	54	1.87284e-08		0.736648	54	0.000130622
WBGene00021112		-0.441814	10	23.5061		1.06095	10	0.000419006		0.586283	10	0.0328898		1.28274	10	0.000376931		-1.85258	10	11426.3		-0.0712969	10	3.11446
WBGene00021111		0.00857692	3	1.04684		0.0388075	3	0.740983		-0.268579	3	1.254		-0.0457083	3	0.69975		-0.00818349	3	0.384334		0.0453062	3	0.85106
WBGene00021113		0.904399	11	0.00745226		0.685913	11	0.0050192		-0.790202	11	89.9569		-0.71905	11	87.7295		-1.34038	11	1321.46		1.07435	11	0.0122223
WBGene00021110		1.03022	12	0.00247393		0.423865	12	0.0343917		0.966669	12	0.00194037		0.942789	12	0.0012752		-1.21836	12	1158.27		2.26716	12	1.61111e-05
WBGene00021114		0.877006	8	0.0196352		0.216825	8	0.271419		0.297648	8	0.191563		0.132137	8	0.386446		-0.102787	8	0.673934		1.0783	8	0.026918
WBGene00021115		0.400056	3	0.317987		-0.206107	3	1.808		-1.48088	3	26.7135		-1.35928	3	23.3057		-0.00586134	3	0.382378		0.736762	3	0.20797
WBGene00021109		-0.358899	13	27.853		-0.403576	13	55.6419		-0.229812	13	4.29214		-0.362541	13	13.3702		-0.0930751	13	0.897826		1.50794	13	0.000603391
WBGene00015696		-0.00433164	1	0.932012		0	1	0.774865		0.0306455	1	0.563158		0.0238821	1	0.550099		-0.0282438	1	0.373936		0.0764617	1	0.657516
WBGene00015695		0.175154	6	0.645078		-0.0391192	6	1.21369		0.0694561	6	0.544743		-0.275633	6	2.14787		-0.154654	6	0.705311		0.530403	6	0.257459
WBGene00015694		0.0526918	9	1.27668		-0.508872	9	39.1592		-0.880512	9	67.8255		-1.24596	9	749.273		-0.402161	9	3.24609		-0.102206	9	3.05137
WBGene00015693		0.244011	7	0.473332		-0.180355	7	2.97222		-0.85274	7	26.6928		-1.09786	7	108.386		-0.0975368	7	0.614603		0.232573	7	0.682093
WBGene00015692		0.00715365	10	1.7557		-0.294335	10	10.8846		-0.44968	10	9.61545		-0.678597	10	47.1303		-0.283569	10	2.09258		-0.161749	10	4.7224
WBGene00015697		-0.412638	8	12.3559		-0.242061	8	5.11315		-0.643126	8	15.0097		-0.77423	8	37.127		-0.144845	8	0.815901		-0.0218798	8	1.9004
WBGene00002694		0.963979	35	3.79867e-06		0.667161	35	2.73553e-06		0.00808331	35	1.75442		0.102207	35	0.346323		-0.668506	35	77734.2		0.466375	35	0.0839539
WBGene00015691		0.183079	34	0.707973		0.200366	34	0.0599689		0.0960715	34	0.429695		-0.0151939	34	2.68078		-0.38313	34	465.297		-0.061504	34	103.356
WBGene00015698		1.35894	9	0.00112089		1.61487	9	1.52582e-05		0.977117	9	0.00563048		0.241179	9	0.206918		-1.41983	9	534.28		1.65243	9	0.00180617
WBGene00019769		0.536563	13	0.0551807		0.0917646	13	0.597332		1.45478	13	4.95951e-05		0.806317	13	0.00233006		-0.567033	13	23.5578		0.208034	13	0.997767
WBGene00019768		0.0620855	5	0.986586		-0.446623	5	7.82366		-0.399917	5	2.63038		-0.250973	5	1.65867		-0.307467	5	1.03563		-0.125405	5	1.69728
WBGene00019767		0.0827909	6	0.952176		0.0455033	6	0.775335		0.0904716	6	0.50303		-0.147406	6	1.27135		0.0144129	6	0.383374		-0.405391	6	4.84763
WBGene00019770		0.142593	7	0.755194		-0.24231	7	4.2697		-0.523286	7	6.6613		-0.661295	7	14.7847		0.00214024	7	0.40942		-0.915664	7	38.0838
WBGene00019771		-0.605807	46	4.70186e+06		-0.267582	46	10253.5		-0.576381	46	447406		-0.582229	46	2.18636e+06		-0.43781	46	17965.7		-0.430988	46	435632
WBGene00023067		0.0102979	4	1.11914		0.508968	4	0.105997		-0.749417	4	6.0011		-0.894233	4	10.6952		-0.0131286	4	0.399824		-0.58728	4	4.34161
WBGene00023068		0.363509	3	0.355402		0.972266	3	0.0247359		-1.80711	3	60.8416		-1.7226	3	61.4585		0.00779346	3	0.371078		0.148353	3	0.68986
WBGene00006984		-0.000547177	3	1.07632		-0.274392	3	2.31849		-0.754261	3	4.27075		-1.38851	3	25.1965		-0.735771	3	1.90056		-0.0264161	3	0.985001
WBGene00018798		0.00106279	7	1.44943		0.0878283	7	0.619595		-0.378745	7	3.62309		-0.46917	7	6.15277		-0.064279	7	0.536697		-0.120675	7	2.35107
WBGene00018797		0.456907	8	0.160233		0.13484	8	0.458609		-0.597453	8	12.1456		-0.826417	8	48.2887		-0.304818	8	1.68817		-0.350677	8	6.78228
WBGene00019012		0.260024	12	0.386952		-0.644063	12	335.959		-0.482323	12	18.5659		-0.363263	12	10.8871		0.897819	12	0.00144545		0.463083	12	0.243682
WBGene00019013		1.27016	9	0.0018084		-0.223214	9	5.37939		0.667337	9	0.0269819		0.118207	9	0.407456		1.00286	9	0.00282713		0.997137	9	0.028987
WBGene00002034		0.559397	10	0.0722002		0.507022	10	0.0267019		0.0513663	10	0.61706		-0.248687	10	3.59806		0.547444	10	0.0219429		-0.214928	10	6.03181
WBGene00019011		0.380681	17	0.121918		-0.555558	17	923.548		-1.70428	17	1.84953e+06		-0.885337	17	4008.69		0.0304163	17	0.396024		0.372665	17	0.37316
WBGene00019010		-0.00235581	15	2.7255		-0.212688	15	13.4998		-0.626462	15	113.795		-0.361483	15	20.1879		-0.203524	15	2.43451		-0.0612496	15	6.2236
WBGene00019009		0.0396584	4	1.0118		-0.0227987	4	0.985582		-0.30266	4	1.60953		-0.140044	4	0.999815		-0.327112	4	0.923586		-0.00840432	4	1.07953
WBGene00019008		-0.485839	8	17.8131		0.0620531	8	0.73061		-1.76945	8	2779.77		-1.53269	8	1693.39		-0.815598	8	17.2055		1.47191	8	0.0058693
WBGene00015303		0.218735	44	0.375359		-0.15252	44	338.518		-0.451976	44	21669		-0.318179	44	3419.21		-0.154363	44	26.0276		0.115757	44	22.0371
WBGene00017795		-0.0637644	25	12.0259		-0.158795	25	30.2144		-0.851611	25	32846.8		-0.941906	25	328006		0.662771	25	0.000153193		0.178271	25	2.42797
WBGene00001592		-0.108529	11	3.85663		-0.0887994	11	2.56777		-1.48518	11	5442.99		-1.56227	11	20318.7		0.888893	11	0.00227223		-0.411189	11	19.6119
WBGene00017674		0.822603	8	0.0257693		0.812526	8	0.00600398		-0.76587	8	26.5151		-0.755553	8	33.7938		0.450117	8	0.0546026		1.72685	8	0.00218865
WBGene00006774		0.0123547	10	1.70372		-0.361092	10	17.958		-1.40472	10	1804.11		-1.74839	10	28407.3		-0.297415	10	2.25768		-0.392483	10	13.6557
WBGene00017673		0.208139	4	0.567285		0.157473	4	0.462808		-0.362342	4	1.91889		-0.788487	4	7.67141		0	4	0.386069		-0.679692	4	5.42175
WBGene00017672		1.18128	9	0.00291919		0.79815	9	0.00444955		0.22828	9	0.248654		0.604068	9	0.0280139		0.412674	9	0.0545399		0.738636	9	0.0866419
WBGene00017671		0.00917284	17	2.88185		0.0395715	17	1.07089		-0.582233	17	142.882		-0.429268	17	57.7025		0.158245	17	0.129042		0.0613342	17	3.47399
WBGene00017675		-0.231729	6	3.58563		-0.0678374	6	1.41304		-0.684851	6	9.50614		-0.337328	6	2.76428		0.204896	6	0.192897		-0.0336592	6	1.51051
WBGene00017676		-0.128553	5	2.04561		-0.14512	5	1.87143		-0.747178	5	8.47208		-0.462433	5	3.56317		0	5	0.394847		0.00198973	5	1.19254
WBGene00002075		0.442418	20	0.0539105		-0.051468	20	3.7909		-1.06211	20	35066.1		-0.598189	20	729.385		-0.568113	20	179.838		0.445697	20	0.19729
WBGene00017886		-0.406053	12	30.5694		-0.391187	12	38.153		-1.02113	12	561.04		-0.36682	12	11.1589		0.508593	12	0.017615		0.973266	12	0.0160262
WBGene00017888		-0.90449	9	221.724		-1.00466	9	1227.73		-1.58874	9	2439.15		-0.844809	9	82.16		-0.579804	9	7.9114		-0.0471459	9	2.41662
WBGene00017885		-0.179643	54	3218.13		-0.39946	54	3.23353e+06		-0.118674	54	68.5332		-0.0766457	54	34.9315		-0.251671	54	857.105		0.870975	54	8.07777e-06
WBGene00017889		-0.277645	6	4.35142		-0.60836	6	24.7326		-0.0897684	6	0.996144		0.69696	6	0.0402353		-1.41872	6	67.282		2.11766	6	0.00177178
WBGene00017887		-0.7766	7	52.1145		-0.17589	7	2.89562		-1.37259	7	238.565		-1.14166	7	132.366		-0.306064	7	1.43775		0.320221	7	0.501762
WBGene00001860		0.518107	20	0.0258995		-0.30286	20	99.8521		-1.00394	20	19938.6		-0.579318	20	595.804		-0.163849	20	2.93341		0.945778	20	0.00316278
WBGene00044431		0.172129	2	0.630772		-0.761794	2	8.56667		-1.49692	2	14.2594		0.11767	2	0.460198		0.185137	2	0.26808		0.285367	2	0.511085
WBGene00021015		-0.226136	13	11.069		0.759427	13	0.00132427		0.381157	13	0.0695086		0.811084	13	0.00224925		-0.349605	13	5.26253		2.0145	13	3.36062e-05
WBGene00021014		0.74923	11	0.0194101		0.515204	11	0.0198403		0.313301	11	0.133311		0.135975	11	0.35099		0.361999	11	0.0523517		1.58845	11	0.000950328
WBGene00000155		0.259659	12	0.387879		-0.561516	12	165.153		0.0568268	12	0.61306		0.0279278	12	0.723424		0.775146	12	0.00317865		-0.667509	12	101.433
WBGene00021016		0.346314	8	0.278462		-0.95119	8	477.594		-0.536018	8	9.13546		0.196935	8	0.278836		1.14941	8	0.00227427		1.80166	8	0.00163853
WBGene00044432		0.894842	8	0.0179609		-0.50866	8	28.1484		-1.31494	8	338.014		-1.73853	8	4775.47		-0.935746	8	29.7053		-0.649209	8	21.5301
WBGene00004900		0.222332	13	0.490163		-0.537459	13	189.514		-1.30694	13	6159.51		-1.25371	13	9815.88		-0.254753	13	2.7367		0.0644029	13	2.26279
WBGene00195069		0.112201	1	0.71603		-0.408803	1	2.18843		-1.13113	1	3.95655		-0.219071	1	0.835804		0	1	0.360888		-1.2187	1	3.5652
WBGene00003906		0.309887	8	0.334057		-1.69649	8	56223.4		-0.714488	8	20.8951		-1.35451	8	690.255		-0.628626	8	7.35521		0.606038	8	0.167361
WBGene00021017		0.101419	6	0.880261		-0.503937	6	14.227		-0.280134	6	2.04984		-1.65704	6	610.229		0.510098	6	0.0641771		0.471895	6	0.309323
WBGene00001117		-0.228025	12	9.50803		-0.566125	12	171.833		-1.39046	12	5802.96		-1.31638	12	8051.47		0.222923	12	0.110371		0.0906853	12	1.77662
WBGene00003221		-0.279371	12	13.316		-0.108555	12	3.35432		-0.0369444	12	1.10949		-0.207909	12	3.70922		0	12	0.462145		-0.327794	12	16.5626
WBGene00001050		0.291001	10	0.340491		-0.710614	10	247.037		0.46938	10	0.0624204		0.657079	10	0.0159296		-0.813941	10	38.3683		0.0962785	10	1.44033
WBGene00018792		0.262659	6	0.446068		-0.267684	6	4.07163		-1.03307	6	35.5861		-0.657792	6	10.2506		-0.347607	6	1.41431		-0.25156	6	2.99203
WBGene00006058		0.223193	8	0.51519		-0.390083	8	13.1819		-0.856298	8	40.3228		-0.538462	8	11.3232		-1.01361	8	42.3179		0.282272	8	0.585777
WBGene00018789		0.279658	17	0.28813		-0.431765	17	226.36		-0.579663	17	139.816		-0.948731	17	7227.92		-0.0738704	17	0.988607		0.841596	17	0.0129561
WBGene00018791		0.696259	6	0.071702		-1.04859	6	254.528		-2.2332	6	3365.53		-1.9357	6	1907.29		-0.0316272	6	0.452607		-0.753771	6	14.4585
WBGene00003934		0.0581381	7	1.11433		-0.66546	7	50.6831		0.11388	7	0.454646		0.437878	7	0.098069		-1.23091	7	62.3215		0.870799	7	0.0729227
WBGene00016730		-0.326899	7	6.56606		-0.868895	7	166.505		-0.44903	7	4.87177		-0.425719	7	5.04618		-0.868899	7	14.2523		0.48227	7	0.284421
WBGene00002979		0.0889398	50	5.70949		0.178213	50	0.0427111		-0.252782	50	977.954		-0.322663	50	11915.2		0.185644	50	0.0119941		-0.209361	50	18955.8
WBGene00016729		0.872093	2	0.0984933		-0.42205	2	2.99745		-0.595534	2	2.14673		-1.40622	2	13.0563		-0.222453	2	0.542		0.802809	2	0.215208
WBGene00016731		2.23361	6	0.000109858		1.17207	6	0.00198874		-0.433057	6	3.65997		-0.168852	6	1.38789		1.00051	6	0.0109495		2.17525	6	0.00147895
WBGene00016732		1.47038	8	0.0010122		1.41632	8	0.000126111		0.607638	8	0.0455206		-0.0433361	8	0.935236		1.7284	8	0.000163666		1.85464	8	0.00133487
WBGene00016733		0.837901	10	0.0144412		1.15268	10	0.00021058		-0.484873	10	11.6611		-0.508596	10	17.0415		-1.65524	10	3871.36		0.523634	10	0.201528
WBGene00016728		0.450636	7	0.182726		0.505838	7	0.0537892		-0.666055	7	12.1562		-1.50982	7	710.182		-0.856523	7	13.5513		0.071054	7	1.20109
WBGene00016734		-0.358866	12	22.4313		0.445962	12	0.0284379		-0.358796	12	8.49863		-0.65703	12	83.4025		0	12	0.462145		0.059283	12	2.10062
WBGene00016727		0	1	0.922923		-0.0148907	1	0.804731		0	1	0.592877		-0.0335926	1	0.607318		0	1	0.360888		0	1	0.726523
WBGene00016735		-0.0669494	33	28.2688		-0.627631	33	1.1494e+06		-0.386696	33	663.672		-0.373096	33	1075.03		-0.441158	33	977.835		-0.0696225	33	99.1007
WBGene00016258		0.0895939	14	1.28485		-0.770275	14	2561.8		-1.99194	14	1.50722e+06		-1.23586	14	16051.8		-3.21879	14	9.49126e+09		-0.0819099	14	6.08601
WBGene00002213		-0.14226	24	26.2864		-0.301109	24	229.984		-0.433933	24	189.444		-0.394396	24	202.302		-0.0836285	24	1.65941		0.112813	24	4.32328
WBGene00016259		0.31685	9	0.30759		-0.323785	9	10.8206		-0.708133	9	28.3601		-0.41306	9	7.61108		-0.103395	9	0.725558		0.29273	9	0.572785
WBGene00022465		1.40348	5	0.00583186		-0.443911	5	7.72363		-0.0982156	5	0.95212		0.459426	5	0.127099		0.387672	5	0.11706		0.900145	5	0.0990398
WBGene00004959		1.3861	18	1.46723e-05		0.534353	18	0.00303469		1.90597	18	5.03424e-08		2.08815	18	1.52096e-09		1.76348	18	4.41871e-08		0.572134	18	0.0821277
WBGene00000502		-0.28199	7	5.33902		0.295309	7	0.184193		-1.57007	7	548.24		-1.23463	7	202.312		0.596712	7	0.0362906		-1.1964	7	101.821
WBGene00003924		-0.0756896	2	1.2173		-0.507061	2	3.89824		-1.99602	2	40.6836		-1.85969	2	35.3315		0	2	0.369094		0	2	0.823481
WBGene00022460		0.194611	7	0.594283		-0.158418	7	2.61444		-0.464908	7	5.20883		-0.152663	7	1.45156		0.0222435	7	0.377213		0.248869	7	0.644246
WBGene00000001		0.203032	12	0.562372		-0.321345	12	20.9217		-1.16757	12	1416.81		-1.50921	12	30643		-0.738922	12	53.2419		1.08505	12	0.0088277
WBGene00045212		0.151154	2	0.666867		-0.325505	2	2.2241		-1.06786	2	5.78988		-1.0784	2	6.35734		-1.7318	2	7.34793		1.33492	2	0.0884249
WBGene00022462		0.11951	16	1.09388		0.351629	16	0.0357756		-0.260742	16	8.19232		-0.918013	16	3383.14		-1.72885	16	866189		0.48024	16	0.18159
WBGene00022463		0.839523	19	0.00148152		0.213281	19	0.129632		-0.917244	19	5628.5		-0.615108	19	628.609		0.0761253	19	0.258259		0.253983	19	0.931666
WBGene00022459		0.239316	23	0.365815		-0.144334	23	18.6262		-0.653584	23	1694.96		-0.585213	23	1637.3		-0.538206	23	302.884		1.02747	23	0.000758024
WBGene00003132		1.00676	17	0.000590489		0.217769	17	0.141488		-0.659189	17	273.531		-0.150532	17	4.32053		-2.1082	17	5.56229e+07		0.126436	17	2.1788
WBGene00022458		-0.238526	9	6.13067		-1.18866	9	4409.45		-0.468282	9	8.42952		-0.75997	9	51.4793		-0.727647	9	16.6052		1.6666	9	0.00170098
WBGene00022457		0.480631	10	0.113818		0.474099	10	0.0341807		-0.077504	10	1.25048		0.303617	10	0.132059		0.461212	10	0.035212		0.825934	10	0.0501359
WBGene00022456		0.0779993	9	1.11395		-0.0240269	9	1.34772		-0.632345	9	19.3294		0.106983	9	0.433451		1.2126	9	0.000987504		-0.0790213	9	2.76596
WBGene00003475		-0.0866397	7	2.17096		-0.0265916	7	1.20961		-0.875021	7	29.3199		-0.78116	7	25.5479		-0.999183	7	24.2373		-0.414564	7	6.58233
WBGene00022455		0.329878	7	0.318701		-0.211725	7	3.57056		0.584672	7	0.062549		0.109097	7	0.439635		-0.837931	7	12.5624		0.0545434	7	1.2726
WBGene00006797		0.255952	20	0.328116		0.0190347	20	1.51472		-0.613308	20	449.817		-0.672353	20	1615.2		-0.778608	20	1533.25		-0.236774	20	55.5677
WBGene00022454		0.331323	9	0.284516		-0.440725	9	24.3877		-1.14843	9	263.001		-0.838564	9	79.3808		-0.940105	9	48.1904		-0.0404304	9	2.34885
WBGene00004094		0.402339	18	0.0934861		0.177935	18	0.211645		0.145692	18	0.299254		-0.312759	18	23.5417		1.00771	18	4.77214e-05		1.07649	18	0.00183899
WBGene00002804		1.8016	13	8.37723e-06		1.57248	13	7.75832e-07		1.50891	13	3.44204e-05		0.881904	13	0.00133137		0.0226746	13	0.404258		-0.171071	13	8.66264
WBGene00001833		0.689999	32	0.000480398		0.0978509	32	0.507766		0.316315	32	0.0167497		0.274019	32	0.0212884		1.40258	32	1.67974e-10		1.35672	32	1.22407e-06
WBGene00004955		0.403992	29	0.0374627		0.714684	29	7.91412e-06		-0.140816	29	10.8024		0.581547	29	0.000279122		0.481601	29	0.000656443		1.0138	29	0.000196796
WBGene00003792		0.534876	27	0.00868224		0.0123236	27	2.21048		-0.305852	27	72.1901		0.297103	27	0.0242698		-0.686827	27	6742.23		0.888432	27	0.00125136
WBGene00018909		-0.00209456	9	1.71505		0.162282	9	0.369258		-0.837778	9	54.6405		-0.772827	9	55.2586		0.152505	9	0.201067		0.151939	9	1.03988
WBGene00000272		0.0989507	7	0.923351		-0.29646	7	5.85998		-0.750752	7	17.369		-0.0327513	7	0.839845		-0.0711592	7	0.551959		0.0189758	7	1.44147
WBGene00018908		-0.0536454	14	3.67745		-0.15274	14	6.3939		-1.21179	14	5604.51		-0.772221	14	416.126		0.0235502	14	0.406441		-0.409867	14	44.5134
WBGene00016328		0.675897	15	0.0143835		0.717228	15	0.000973506		-0.437354	15	27.0695		-0.379175	15	23.4025		-0.476711	15	20.6885		0.128393	15	1.83725
WBGene00016329		0.295516	11	0.318903		-0.145001	11	4.03716		-0.881225	11	153.957		-1.25727	11	2834.84		-0.726774	11	34.2261		-0.668533	11	70.4359
WBGene00004771		0.0744872	23	2.1903		0.136835	23	0.301528		-0.979613	23	60667.4		-0.77338	23	16077.8		-0.16235	23	3.8849		-0.559278	23	2150.7
WBGene00016330		0.526922	46	0.000813332		-0.0305158	46	15.6967		-0.402295	46	12198.1		-0.316395	46	4793.19		0.264822	46	0.00263862		0.63561	46	0.0025055
WBGene00016327		0.914088	16	0.00172164		0.503276	16	0.00694747		-0.403562	16	25.7401		-0.0162267	16	1.18299		-0.186927	16	2.38696		1.14462	16	0.00198185
WBGene00015092		0.264455	5	0.454945		-0.362673	5	5.25332		-0.568825	5	4.64618		-0.204688	5	1.40305		0	5	0.394847		0.241007	5	0.615015
WBGene00002583		0.492503	80	3.07942e-05		-0.614922	80	7.13451e+13		-0.501238	80	4.26769e+08		-0.409746	80	1.12708e+08		-0.524018	80	1.1453e+09		0.77122	80	1.07026e-06
WBGene00015093		-0.418882	6	7.89261		-1.18376	6	520.708		-1.08192	6	42.8247		-0.25934	6	2.00941		-0.198155	6	0.825095		1.46406	6	0.0137656
WBGene00015094		1.6887	20	3.08517e-07		-0.157457	20	15.0553		1.32785	20	2.95395e-06		0.415358	20	0.0139458		-2.61139	20	1.9477e+11		1.04893	20	0.00134838
WBGene00015091		0.183644	10	0.633182		-0.319269	10	13.1229		-0.406706	10	7.59764		-0.133293	10	1.8038		0	10	0.441824		0.322281	10	0.509056
WBGene00195057		0.513391	4	0.198845		-0.113316	4	1.44057		-1.80496	4	134.456		-1.47754	4	66.8742		-0.0521464	4	0.443663		0.00444708	4	1.04669
WBGene00015095		-0.345107	7	7.14055		-1.30361	7	2114.76		-1.70046	7	949.633		-1.4337	7	501.787		-0.577429	7	4.34501		-1.05413	7	61.8582
WBGene00015096		-0.802985	4	18.2772		-1.92276	4	2842.53		-1.71566	4	103.356		-1.51381	4	74.9469		-1.9523	4	70.3929		-1.68637	4	60.9856
WBGene00015312		-0.0550253	5	1.54411		-0.451622	5	8.01144		-1.57595	5	138.136		-1.29427	5	72.1371		-0.185695	5	0.706888		-0.010873	5	1.2358
WBGene00000540		0.474564	16	0.0611568		-0.150677	16	8.15025		-0.759442	16	446.214		-0.592318	16	190.989		0	16	0.505632		0.0514654	16	3.35217
WBGene00000965		0.172735	8	0.662939		-0.309439	8	7.8687		-0.153965	8	1.55433		-0.787994	8	39.7921		-0.583321	8	5.98641		-0.182018	8	3.53144
WBGene00001022		0.0977154	4	0.828897		-0.012834	4	0.945249		-0.846447	4	7.98657		-0.522449	4	3.32508		-0.0798412	4	0.477667		-0.248924	4	1.92472
WBGene00001333		-0.159108	25	36.4807		-0.454524	25	3201.28		-0.638223	25	2637.6		-0.549332	25	1925.62		-0.244385	25	13.2292		0.203477	25	1.88244
WBGene00015313		0.913858	6	0.0286506		-0.155384	6	2.24646		-0.711189	6	10.5043		-0.706774	6	12.5241		-0.365506	6	1.5086		0.647266	6	0.178446
WBGene00002717		-0.403492	43	42094.4		-1.36455	43	9864534733837860		-0.916915	43	1.44399e+08		-0.792511	43	8.01038e+07		-1.60528	43	394862754318603		-0.255663	43	9985.89
WBGene00018596		-0.0999359	2	1.29818		-0.684853	2	6.75352		-0.113599	2	0.780033		-0.0726687	2	0.698897		-0.136995	2	0.467624		-0.320883	2	1.40798
WBGene00018598		-2.60426	4	8882.62		-2.54356	4	38392.2		-2.1076	4	327.902		-1.93852	4	284.691		-2.71266	4	534.645		-1.144	4	16.555
WBGene00018599		-0.388975	4	4.40969		-1.5165	4	517.45		-0.930823	4	10.24		-0.819153	4	8.44747		-1.46061	4	18.9722		0.127461	4	0.778713
WBGene00018595		-0.84911	4	21.4145		-0.784735	4	24.0578		-0.678448	4	4.86901		-1.21046	4	28.8906		-0.88053	4	4.03983		0.0505947	4	0.936774
WBGene00018594		-1.24615	17	126207		-1.51387	17	4.92861e+07		-0.751264	17	594.904		-0.670374	17	543.106		-0.108866	17	1.34383		0.259217	17	0.841341
WBGene00004965		-2.18027	7	33502.4		-1.8283	7	45451.8		0.0306572	7	0.645587		-0.228388	7	2.0507		-0.21631	7	0.997285		0.310405	7	0.519316
WBGene00018601		-0.774055	4	16.5486		-1.79625	4	1672.37		1.5685	4	0.00650043		-0.59201	4	4.13748		1.07677	4	0.0218632		0.744843	4	0.176506
WBGene00195179		-1.45925	2	47.8047		-3.90907	2	143747		-2.18818	2	60.915		-2.39498	2	114.422		-4.31568	2	637.282		-2.34725	2	41.6511
WBGene00018600		-1.7113	12	159913		-1.09794	12	16671.7		-0.125252	12	1.93968		0.128737	12	0.359707		-1.33923	12	2517.82		-0.358395	12	19.4995
WBGene00018865		-0.501602	7	14.6828		-0.693633	7	59.7585		-0.576236	7	8.32619		-0.191187	7	1.73052		-0.339268	7	1.64609		0.135423	7	0.958616
WBGene00000150		0.235797	5	0.507651		-1.54798	5	1454.5		-1.15714	5	33.704		-0.631974	5	6.57789		-0.931979	5	7.34187		-0.971408	5	17.6875
WBGene00018864		-1.02454	9	423.379		-1.36428	9	14941.7		-0.287121	9	3.37155		-0.10551	9	1.39783		-0.663258	9	12.0229		-0.336378	9	8.22744
WBGene00018866		-0.960022	14	2853.47		-1.27212	14	333975		-0.225423	14	4.74997		0.306552	14	0.0847767		-0.159982	14	1.56998		0.583312	14	0.107521
WBGene00000966		-0.365945	6	6.31392		-0.956023	6	155.897		-0.579081	6	6.36613		-1.03672	6	48.2796		-0.842665	6	8.42955		-0.815195	6	17.5307
WBGene00004087		0.0806416	15	1.43463		-0.593358	15	669.72		-0.419511	15	23.6395		-0.585413	15	131.011		-0.519954	15	29.029		-0.155964	15	11.4467
WBGene00018863		-0.396392	6	7.17866		-0.33736	6	5.88862		1.12875	6	0.00982385		1.29923	6	0.00342712		-1.44256	6	73.3221		0.637431	6	0.184037
WBGene00018867		-0.403512	5	5.85579		-1.34394	5	552.464		1.41076	5	0.005907		1.14993	5	0.0104655		-0.0959421	5	0.533463		2.26131	5	0.00228063
WBGene00004131		-0.501056	36	38820		-0.626709	36	3.6761e+06		-0.870279	36	3.4646e+06		-0.839269	36	1.03849e+07		-0.880187	36	4.60846e+06		0.371281	36	0.307353
WBGene00016041		0.265072	8	0.417907		-0.317457	8	8.28289		-0.51426	8	8.25896		-0.612832	8	16.4682		0.218066	8	0.156773		0.269642	8	0.615114
WBGene00016042		-0.0237672	2	1.06066		0.0211928	2	0.761659		-0.575236	2	2.05712		-0.478427	2	1.70319		0.0895467	2	0.316204		0.204655	2	0.584905
WBGene00016043		0	2	0.995846		0	2	0.813222		0.307251	2	0.322239		0	2	0.595842		0	2	0.369094		0	2	0.823481
WBGene00016040		-0.988929	7	138.591		0.97915	7	0.00337954		-1.1022	7	76.3579		-0.777719	7	25.1499		1.43156	7	0.00120817		0.861026	7	0.0754625
WBGene00001491		0.210078	19	0.514769		-0.284473	19	64.0293		-1.17341	19	60705.1		-0.66118	19	1007.84		-0.266779	19	7.21622		0.438942	19	0.216161
WBGene00000761		0.350297	10	0.241711		-0.708875	10	243.836		-0.723001	10	43.0089		-1.14352	10	761.22		-0.696034	10	20.097		0.489446	10	0.235866
WBGene00016278		-0.0713183	11	3.06557		0.1161	11	0.493273		-0.306255	11	5.1676		-0.0193893	11	0.957197		-0.240864	11	1.89609		0.0683511	11	1.81054
WBGene00017855		0.140624	30	1.23821		-0.348866	30	2014.86		-0.377596	30	321.715		0.122089	30	0.26728		-0.529271	30	1821.18		0.433958	30	0.155209
WBGene00017854		-0.0767578	6	1.86566		-2.19361	6	109418		-0.205522	6	1.54486		-0.320932	6	2.58501		0.0617425	6	0.323225		-1.95908	6	634.007
WBGene00017853		-0.690729	7	35.0889		1.5715	7	0.000105868		-0.815933	7	22.8584		0.873911	7	0.0134099		-1.16284	7	47.2233		1.13798	7	0.0286012
WBGene00000230		1.04556	6	0.0164439		0.939258	6	0.00682336		-0.0771174	6	0.9495		0.0958883	6	0.470064		-0.29124	6	1.15418		1.88331	6	0.00369533
WBGene00017852		0.431266	6	0.219129		-0.806691	6	70.6965		-1.31607	6	104.034		-0.968482	6	36.5226		0	6	0.403825		0.014987	6	1.29674
WBGene00001067		0.235122	2	0.533697		-0.267904	2	1.86137		-1.38179	2	11.1962		0.441606	2	0.225998		0	2	0.369094		0	2	0.823481
WBGene00017858		0.495138	30	0.0100004		0.128621	30	0.290406		-0.0675462	30	4.28118		-0.0998956	30	8.25963		-0.131754	30	4.91861		0.469694	30	0.101343
WBGene00017851		0.551866	8	0.0996938		1.4736	8	8.74165e-05		0.774853	8	0.0209678		0.427343	8	0.0873676		0	8	0.422398		1.23103	8	0.0149066
WBGene00017860		0	3	1.07453		0	3	0.853476		-0.0240814	3	0.676677		-0.0182035	3	0.650223		0	3	0.377486		0	3	0.933378
WBGene00020262		1.60692	27	1.43154e-08		1.21502	27	3.41055e-09		0.958002	27	8.08127e-06		0.719537	27	6.46064e-05		0.720503	27	3.95084e-05		1.53151	27	1.18285e-06
WBGene00001859		0.646592	20	0.00746159		0.00124296	20	1.90929		-0.548549	20	239.913		-0.502016	20	260.154		1.24814	20	1.67519e-06		0.566448	20	0.0727228
WBGene00020263		-0.132737	25	26.8386		-0.234556	25	99.7736		-0.201342	25	15.0928		-0.105811	25	5.8035		0.166739	25	0.0766301		1.03066	25	0.000444231
WBGene00015635		-0.0286482	18	4.33908		-0.256133	18	37.215		-0.993742	18	7260.26		-1.15935	18	92225.7		-0.319327	18	10.1167		0.635238	18	0.051057
WBGene00004431		0.108625	3	0.77203		-0.139843	3	1.42032		-0.116723	3	0.854864		-0.188418	3	1.02413		-0.954879	3	3.07558		-0.00838098	3	0.949456
WBGene00015636		-1.53212	5	438.969		-0.344306	5	4.81492		-0.215043	5	1.41119		-1.19567	5	50.5026		1.64005	5	0.00230485		0.36449	5	0.436828
WBGene00206357		0.138435	2	0.689753		-0.0369372	2	0.911574		-0.631852	2	2.31691		-1.49214	2	15.7667		-0.0565747	2	0.40698		0.873684	2	0.191164
WBGene00015634		1.20829	17	0.000106189		0.615895	17	0.00153746		0.485374	17	0.0174738		0.551533	17	0.00631379		0.22916	17	0.069273		2.26449	17	4.83164e-07
WBGene00015633		-0.00777911	1	0.939309		0.126025	1	0.562629		-0.417498	1	1.19462		-0.157604	1	0.751871		0.0306115	1	0.34726		-5.53998e-05	1	0.726575
WBGene00015632		-0.104703	27	24.4703		-0.838569	27	3.78987e+06		-0.864385	27	85177.8		-0.698272	27	28314.5		0.294998	27	0.0121804		0.3728	27	0.333001
WBGene00019076		0.254589	7	0.450819		0.30238	7	0.176733		-1.80774	7	1492.27		-1.94802	7	5245.49		-0.197914	7	0.92525		0.854585	7	0.0771847
WBGene00019077		1.59539	12	6.0707e-05		0.872897	12	0.000722518		-0.0249924	12	1.02869		-0.245844	12	4.82472		-1.02204	12	328.172		0.803898	12	0.0395569
WBGene00019079		1.46437	7	0.00171306		-0.03768	7	1.29062		-0.598385	7	9.14061		-1.18739	7	163.081		-0.824733	7	11.9045		-1.15929	7	89.4102
WBGene00019075		0.346736	15	0.183313		-0.327253	15	43.7137		0.221027	15	0.182499		-0.235693	15	7.06052		-0.0761435	15	0.89762		0.151417	15	1.58431
WBGene00185086		-0.768055	10	154.852		-0.507337	10	53.7806		-1.86206	10	22123.7		-1.63245	10	14194.8		-0.225692	10	1.52343		0.661343	10	0.106931
WBGene00194697		0.494127	4	0.212444		0.114721	4	0.553676		-2.93382	4	3738.65		-1.21048	4	28.8928		-0.0617683	4	0.455193		0.701205	4	0.19603
WBGene00019080		0.0889419	2	0.786534		0.019243	2	0.766263		-0.808106	2	3.35509		-0.223523	2	0.973281		-0.305938	2	0.626068		1.14551	2	0.121361
WBGene00019074		0.451334	32	0.014842		0.315563	32	0.00707969		-0.875829	32	748900		-0.576651	32	24427.3		-0.0380633	32	1.32291		0.153738	32	5.0402
WBGene00019081		0.955427	15	0.00165654		0.549733	15	0.00542481		-0.662064	15	149.12		-0.242288	15	7.46037		-0.0308801	15	0.629676		0.664515	15	0.0583731
WBGene00019082		0.110267	8	0.905823		-0.421703	8	16.1376		-0.030491	8	0.876907		-1.03122	8	135.468		-0.0328663	8	0.490453		-0.42289	8	8.96865
WBGene00019083		0.240938	1	0.53512		0.251556	1	0.409036		-0.110485	1	0.713648		0.146689	1	0.44526		0	1	0.360888		0	1	0.726523
WBGene00006594		0.118672	49	2.93287		-0.194649	49	2226.11		-0.635479	49	3.78577e+06		-0.396794	49	60278		-0.0012804	49	1.09468		0.608766	49	0.00301272
WBGene00019693		0.328797	4	0.374834		0.407967	4	0.161892		-1.50798	4	56.0593		-1.14024	4	23.1699		-0.878483	4	4.01784		-0.304543	4	2.20009
WBGene00019692		0.66795	7	0.0671506		-0.323109	7	6.84797		-0.0435696	7	0.882622		-0.154376	7	1.46294		0.0855527	7	0.291428		1.40706	7	0.0111433
WBGene00019713		-0.104064	17	7.55702		-0.410996	17	178.792		-0.551953	17	110.664		-0.677609	17	580.904		-0.46675	17	31.0301		0.552731	17	0.102681
WBGene00000474		1.02012	10	0.00503847		-0.0483423	10	1.72003		-0.794301	10	63.5731		-1.03692	10	402.237		1.47918	10	0.000132432		0.252017	10	0.703391
WBGene00019712		1.14823	24	1.30468e-05		0.2135	24	0.0913933		-0.578417	24	983.06		-0.625876	24	3750.38		-0.817234	24	11540.8		0.434741	24	0.18854
WBGene00002225		1.34497	16	5.19898e-05		0.603904	16	0.00234167		0.904355	16	0.000720001		0.383955	16	0.0346082		-0.399358	16	13.9257		1.97575	16	6.9606e-06
WBGene00019711		-0.157833	8	3.45849		-0.801505	8	183.293		-1.02006	8	86.1482		-0.632884	8	18.2183		-0.996851	8	39.2149		-0.670461	8	23.3755
WBGene00019710		-0.277169	6	4.34271		-0.510466	6	14.7274		0.111235	6	0.464956		-0.671574	6	10.845		-0.0966039	6	0.572104		0.136741	6	0.885095
WBGene00006508		-0.262426	68	262530		-0.616105	68	7.17046e+11		-0.710261	68	1.15474e+10		-0.688831	68	7.81856e+10		-0.228776	68	2904.22		0.0615074	68	654.436
WBGene00006726		-0.0500264	8	2.01799		-0.914769	8	378.321		-0.231472	8	2.22633		-0.488944	8	8.82371		-0.955554	8	32.5038		1.21075	8	0.0161234
WBGene00006919		-0.285168	4	3.08729		-0.196651	4	2.04313		-2.92878	4	3683.55		-1.39624	4	51.7961		-0.269219	4	0.791469		0.132249	4	0.769801
WBGene00018512		0.16662	18	0.762583		-0.157661	18	11.5185		-1.38136	18	225239		-1.16212	18	94755.4		-0.62363	18	168.43		-0.289564	18	54.1219
WBGene00018509		0.175366	9	0.659226		0.970468	9	0.00134359		-0.17091	9	1.87299		-0.770121	9	54.441		-0.379258	9	2.89387		-0.837812	9	68.8136
WBGene00000473		-0.787194	5	25.4072		-0.12294	5	1.6845		-0.465778	5	3.28367		-0.8789	5	16.0643		-0.302745	5	1.02041		0.320784	5	0.493057
WBGene00018510		0.0771164	8	1.06903		-0.907331	8	360.738		-2.07564	8	11493.6		-2.08903	8	27906.9		-1.84569	8	1857.88		-0.865448	8	49.7081
WBGene00018513		-0.673187	7	32.3649		-0.450808	7	14.4483		-0.101217	7	1.12527		0.684734	7	0.0317925		-2.47166	7	9788.82		-0.999299	7	51.0482
WBGene00018511		0.0629583	6	1.03521		-0.117067	6	1.83389		-0.652202	6	8.39951		-0.398067	6	3.54372		-0.615328	6	3.7136		-0.318867	6	3.69538
WBGene00018508		-0.031201	31	13.9777		-1.17301	31	1.72198e+10		-0.921529	31	961782		-0.941952	31	6.01896e+06		-1.49778	31	6.81618e+09		-0.829568	31	837122
WBGene00044616		0.349613	3	0.370756		-1.56341	3	253.561		-0.0790624	3	0.777372		-2.17025	3	202.974		-1.92906	3	26.1439		-1.22432	3	11.314
WBGene00000630		-0.303048	5	3.98743		0.270677	5	0.260277		-1.54053	5	122.602		-0.826789	5	13.3053		-1.1473	5	14.4239		-1.85046	5	201.994
WBGene00018890		-0.233871	13	11.6803		0.0300816	13	1.05058		-0.562629	13	40.5599		-0.687965	13	148.807		-0.725141	13	70.0621		-0.853679	13	424.339
WBGene00018891		0.040978	12	1.62821		-0.737101	12	747.966		-0.525461	12	24.3909		-0.175495	12	2.96288		-1.25914	12	1505.12		0.0529373	12	2.17295
WBGene00018892		0.349362	19	0.141045		0.0957197	19	0.560937		0.470896	19	0.0142448		-0.0592094	19	2.1123		-1.46263	19	798031		0.479904	19	0.156408
WBGene00018893		-0.168892	13	7.43546		0.474516	13	0.0179729		-0.885636	13	358.734		-1.0872	13	2860.7		-1.96442	13	359461		-0.115655	13	6.31608
WBGene00018894		-0.167773	3	1.79055		1.52172	3	0.0033438		0.0071561	3	0.625391		-0.0129734	3	0.64121		-0.501912	3	1.13701		0.598721	3	0.275531
WBGene00018895		-0.262972	10	8.36294		0.242981	10	0.193466		0.313121	10	0.146984		-0.0456483	10	1.06763		-0.321863	10	2.58162		0.744283	10	0.0730029
WBGene00004224		0.0808815	11	1.19874		-0.316993	11	16.1241		-0.419922	11	10.109		-0.481336	11	18.9014		-0.621768	11	18.3157		0.572237	11	0.148104
WBGene00018896		0	2	0.995846		-0.427847	2	3.05165		-0.463816	2	1.62784		-0.292569	2	1.13257		0	2	0.369094		0	2	0.823481
WBGene00018897		-0.403226	8	11.7882		0.154813	8	0.403595		-0.49397	8	7.51756		-0.588547	8	14.5721		-0.280408	8	1.51089		-0.0364567	8	2.01068
WBGene00020558		0.241799	10	0.452462		-0.0836905	10	2.24221		-1.16412	10	482.577		0.0975075	10	0.453309		-0.860236	10	49.4587		2.07119	10	0.000162684
WBGene00001039		0.510091	4	0.201111		-0.364034	4	4.12209		-1.89565	4	175.63		-1.20267	4	28.1919		0.388504	4	0.137012		0.194733	4	0.662426
WBGene00020557		-0.217572	8	4.6616		-1.00102	8	656.913		-0.599064	8	12.2366		-0.959879	8	94.5762		-1.63569	8	715.301		-2.47718	8	25402.4
WBGene00006776		0.581465	32	0.00228633		0.0859114	32	0.641844		-0.750403	32	117359		-0.77036	32	585810		-0.576201	32	6579.19		0.104968	32	9.34561
WBGene00003793		0.166757	21	0.786952		0.128744	21	0.355246		-0.548023	21	311.828		-0.718671	21	3877.02		-1.45487	21	3.03599e+06		0.198903	21	1.59857
WBGene00020556		-0.180051	17	14.4312		-0.368251	17	110.025		0.326218	17	0.066937		-0.709067	17	778.298		-0.505429	17	43.565		0.687405	17	0.0391157
WBGene00002989		-0.190193	25	52.3828		-0.367981	25	817.881		-1.1276	25	857227		-1.08925	25	2.25609e+06		-0.012206	25	0.721324		-0.0490603	25	24.1031
WBGene00015442		-0.0254997	6	1.50309		-0.0565785	6	1.33125		-0.448795	6	3.88495		-1.16988	6	83.2247		-0.0963617	6	0.571604		0.788975	6	0.114409
WBGene00018994		0.671784	20	0.00584609		-0.0889547	20	6.17419		-0.585509	20	343.441		-0.30046	20	29.9844		0.191036	20	0.0791037		0.645394	20	0.0378698
WBGene00206363		0.19365	3	0.595998		-0.0013853	3	0.857793		-1.08795	3	9.9119		-0.974689	3	8.35018		0.00631437	3	0.372286		-0.672381	3	3.67397
WBGene00004505		0.573451	12	0.0495122		0.303743	12	0.0966574		-0.47775	12	18.0365		-1.02181	12	1045.2		-1.26322	12	1545.16		1.25635	12	0.00353973
WBGene00044305		1.58462	6	0.00169456		0.994444	6	0.00509425		0.314758	6	0.214957		0.0772286	6	0.507338		-1.02351	6	16.1813		1.29545	6	0.0233608
WBGene00000493		0.512394	22	0.0213546		0.505414	22	0.00170531		-0.215456	22	12.1916		0.0216671	22	1.00462		-0.204728	22	5.63861		0.0622174	22	5.7625
WBGene00018995		0.428853	28	0.0295664		-0.124445	28	24.9635		-0.367618	28	191.055		0.127895	28	0.255236		-0.219652	28	14.1466		0.75086	28	0.00477914
WBGene00045483		0.00578327	2	0.980683		-0.174636	2	1.39519		-0.528606	2	1.86517		-0.596144	2	2.20544		-0.512362	2	0.894253		0.0379827	2	0.772823
WBGene00020694		0.287458	12	0.32322		-0.133884	12	4.17094		-1.20472	12	1792.15		-1.29941	12	7157.99		-0.363484	12	4.77354		-0.458192	12	33.2074
WBGene00020693		-1.17857	17	70988.8		-0.857736	17	28580.6		-1.39126	17	131800		-1.27964	17	156804		-0.402052	17	17.5915		-0.363453	17	72.9228
WBGene00001856		-2.03261	6	7108.1		-1.95287	6	30579.2		-1.93546	6	1088.61		-1.80009	6	1095.36		-1.48796	6	86.3647		-2.39738	6	2507.24
WBGene00004393		-0.168834	17	13.1168		-0.0991818	17	5.17848		-0.604489	17	172.402		-0.619514	17	338.447		-0.108146	17	1.33538		-0.0868583	17	10.047
WBGene00000772		0.442822	9	0.156029		1.1455	9	0.000398127		-0.265211	9	3.01785		-0.603728	9	21.7637		0	9	0.432002		1.44513	9	0.00434615
WBGene00001600		-0.1866	14	9.76004		0.567666	14	0.00588042		-0.244188	14	5.43414		0.334567	14	0.067987		-0.64489	14	55.7867		1.11409	14	0.0042945
WBGene00003472		0.289383	23	0.212409		-0.660886	23	36316.3		-0.332272	23	49.87		-0.499147	23	575.899		0.323905	23	0.0138607		0.22138	23	1.43828
WBGene00015175		0.287885	8	0.37288		-0.345611	8	9.91769		0.45592	8	0.0919735		0.952598	8	0.00620009		0.164398	8	0.200082		0.64971	8	0.141341
WBGene00015176		-0.156021	10	4.50769		0.000343518	10	1.19385		-1.20088	10	590.265		-1.39581	10	3444.69		-0.0846033	10	0.702694		0.440133	10	0.295953
WBGene00003020		0.14911	21	0.940095		-0.316796	21	149.598		-0.764673	21	2798.48		-0.727533	21	4281.28		0.351401	21	0.0134033		0.0494937	21	5.80498
WBGene00016332		0.253551	5	0.474322		-0.900272	5	67.3191		-1.9558	5	496.535		-2.06471	5	1169.67		-0.419364	5	1.471		-0.0880484	5	1.5304
WBGene00001973		0.474453	12	0.0947885		1.31946	12	1.55049e-05		-0.531596	12	25.3562		-0.304314	12	7.23553		0.788732	12	0.00291298		1.01725	12	0.0126746
WBGene00003601		-0.245873	5	3.20417		-0.312597	5	4.14241		-1.10624	5	28.3935		-0.642571	5	6.83483		-0.2874	5	0.972468		0.252662	5	0.595474
WBGene00016333		0.0497178	9	1.2973		0.0433332	9	0.843938		-1.32565	9	644.562		-1.83385	9	19121.2		-0.449355	9	4.11288		0.472162	9	0.267867
WBGene00016331		0.100985	15	1.22581		-0.634947	15	1025.97		-1.74686	15	563611		-1.44267	15	168526		-0.0616747	15	0.801444		-0.157108	15	11.5312
WBGene00018002		0.0261751	4	1.05975		-0.035429	4	1.03919		-0.746366	4	5.9474		-0.592647	4	4.14576		-0.0673498	4	0.462018		-0.00944172	4	1.08223
WBGene00269382		0.484763	1	0.308247		-0.487497	1	2.67259		-3.24011	1	136.241		-2.54132	1	45.5534		-1.75011	1	3.25952		-0.408474	1	1.23822
WBGene00000436		0.865992	7	0.0269684		0.631107	7	0.0258589		-0.781118	7	19.7397		-0.536531	7	8.36689		-0.797304	7	10.6455		0.229385	7	0.689754
WBGene00000631		0.987576	8	0.0112998		1.7095	8	1.93252e-05		-0.434291	8	5.70065		-0.347954	8	4.33757		0.373432	8	0.0773726		1.90384	8	0.00110346
WBGene00018003		-0.0943928	8	2.51887		-0.530418	8	32.3527		-2.24538	8	25245.6		-1.6868	8	3680.1		-0.485346	8	3.83504		0.629824	8	0.152646
WBGene00018001		-0.117475	8	2.82682		0.307445	8	0.152001		-0.552461	8	9.85906		0.292889	8	0.171972		-0.00935599	8	0.440747		-0.00807736	8	1.80157
WBGene00018004		0.916458	7	0.0213744		0.922047	7	0.00471905		0.239598	7	0.267692		0.268935	7	0.211999		-0.562647	7	4.09097		-0.261224	7	3.84674
WBGene00018000		1.80385	5	0.00126101		1.02377	5	0.00730645		-0.082828	5	0.90403		-0.779457	5	11.2123		1.13344	5	0.0112889		0.160689	5	0.768289
WBGene00018005		0.553777	6	0.130737		-0.0958467	6	1.63897		-0.215866	6	1.60663		-0.250091	6	1.93483		0	6	0.403825		-0.192072	6	2.48272
WBGene00018006		0.00806737	15	2.51446		-0.0155362	15	1.78725		-0.375209	15	16.8865		-0.604906	15	154.174		0.0820776	15	0.259933		0.0276475	15	3.51284
WBGene00018009		-0.082669	11	3.28793		0.160247	11	0.345717		-0.62993	11	34.9244		-0.749689	11	106.923		-0.397568	11	4.82029		0.779003	11	0.0530179
WBGene00303057		-1.16911	1	12.9953		-0.52427	1	2.93422		-1.09286	1	3.71041		-0.161851	1	0.757389		-1.93998	1	4.13853		1.94988	1	0.0570087
WBGene00018007		0.80194	8	0.0285724		0.0520005	8	0.779144		-0.12385	8	1.3518		0.402988	8	0.0987698		0.121742	8	0.24289		1.12755	8	0.0222473
WBGene00018008		0.592671	5	0.129637		0.211062	5	0.345359		-2.35264	5	1889.97		-2.46144	5	4910.21		-0.616233	5	2.72743		0.0905066	5	0.933185
WBGene00016421		0.456664	12	0.106521		-0.461943	12	70.1258		-0.39774	12	10.8728		-0.101039	12	1.76845		2.58407	12	2.85512e-08		-0.0725486	12	4.244
WBGene00016422		1.20673	21	2.21268e-05		0.441572	21	0.00510339		-0.171763	21	6.8994		-0.276123	21	27.3663		-0.255752	21	8.62314		-0.104414	21	21.9146
WBGene00003996		0.169955	24	0.784363		-0.111553	24	12.8535		-0.632494	24	1820.64		-0.273901	24	44.2499		-0.121121	24	2.6081		0.506845	24	0.093477
WBGene00016420		0.0182714	5	1.16659		0.367109	5	0.164718		0.919903	5	0.0308598		-0.0642993	5	0.844511		-0.913822	5	6.93547		0.710415	5	0.16753
WBGene00016419		0.529671	18	0.0300849		0.0802558	18	0.677372		-0.815305	18	1493.72		-1.05077	18	31919.2		-0.839483	18	1238.19		1.14406	18	0.00110546
WBGene00004109		0.21319	12	0.526118		0.277966	12	0.120653		-1.04699	12	660.757		-1.13393	12	2273.53		-0.899352	12	149.221		0.831928	12	0.034063
WBGene00016418		0.251101	38	0.231193		-0.0875523	38	34.4806		-0.0227803	38	3.29817		-0.0413443	38	5.32898		0.137353	38	0.0641245		0.608571	38	0.00885264
WBGene00015028		0.285394	63	0.0537024		0.195517	63	0.0118263		-0.560219	63	3.28729e+07		-0.699136	63	1.7367e+10		0.572852	63	4.03073e-08		0.597944	63	0.000994604
WBGene00015029		1.26797	8	0.00278326		0.894717	8	0.00354867		-0.484825	8	7.20549		-0.147333	8	1.57908		-0.230247	8	1.20286		0.951517	8	0.0439636
WBGene00000099		0.41205	12	0.142738		0.229332	12	0.183332		0.0947858	12	0.48219		0.770975	12	0.00419519		0.715773	12	0.0046546		-0.612209	12	75.5199
WBGene00001676		0.27499	10	0.373498		-0.546345	10	72.059		-1.04225	10	247.438		-0.664927	10	43.4284		-0.964079	10	87.4149		0.0966767	10	1.43769
WBGene00015030		1.20687	9	0.00254325		-0.650298	9	104.629		0.0950391	9	0.487863		0.0980886	9	0.455224		0.615261	9	0.0197467		0.244915	9	0.701373
WBGene00015031		0.547918	1	0.267209		0.265862	1	0.394441		0.929145	1	0.124686		0.175746	1	0.423533		0.0475493	1	0.339942		-0.106512	1	0.834885
WBGene00015027		0.134423	4	0.73072		-0.322552	4	3.46396		-0.523089	4	3.081		-0.331041	4	1.82214		-0.235225	4	0.722882		0.309524	4	0.502669
WBGene00015032		0.0431732	2	0.888075		0.595279	2	0.12916		-0.331633	2	1.23317		-0.308747	2	1.17352		0	2	0.369094		0.59248	2	0.305876
WBGene00015033		0.0213967	2	0.940892		-0.415048	2	2.93328		-0.580361	2	2.07938		-0.185753	2	0.895836		0	2	0.369094		0.944988	2	0.169685
WBGene00015034		0.107305	6	0.858688		0.0590419	6	0.721693		-0.505427	6	4.81526		-0.0576097	6	0.880605		0.0168956	6	0.379957		0.216158	6	0.689923
WBGene00015026		0.598605	7	0.0924225		-0.00516727	7	1.06719		-0.899193	7	32.4633		-0.390302	7	4.29313		-0.579326	7	4.37873		0.25266	7	0.635746
WBGene00000232		0.255059	17	0.355256		-0.166435	17	11.1162		-1.18325	17	22782.3		-1.17648	17	60087.2		-0.646075	17	149.609		0.357138	17	0.417079
WBGene00015504		1.43937	23	8.02546e-07		-0.339801	23	327.396		-0.26573	23	24.0274		-0.192735	23	13.9574		-0.104366	23	1.98388		0.998402	23	0.000995169
WBGene00015501		0.444985	23	0.0392137		0.264663	23	0.0462573		-0.678913	23	2238.05		-0.939166	23	120317		-0.0234325	23	0.776483		0.958081	23	0.00145168
WBGene00004803		-0.299499	10	10.3282		-0.831289	10	610.716		-2.19629	10	138177		-1.83602	10	47990.4		-0.62595	10	13.6835		1.13306	10	0.0121986
WBGene00006823		-0.389313	31	2090.33		-0.454578	31	19251.3		-1.01522	31	3.69071e+06		-0.805694	31	686934		-0.352021	31	157.268		0.301237	31	0.767254
WBGene00044414		-0.1352	11	4.54641		0.399021	11	0.0505595		-1.29689	11	1790.92		-1.12326	11	1193.24		-0.0559769	11	0.630613		1.44009	11	0.00198599
WBGene00015500		0.255764	4	0.481691		1.44728	4	0.00207268		-1.66259	4	88.3987		-1.0333	4	16.5569		0	4	0.386069		2.29473	4	0.00425108
WBGene00015505		0.463109	6	0.191602		1.3616	6	0.000728935		-1.2251	6	73.6911		-2.56333	6	24839.3		0.166385	6	0.221633		2.15837	6	0.00155939
WBGene00004380		0.142366	5	0.725726		0.140292	5	0.483158		-0.257892	5	1.63029		-0.307855	5	2.03745		-0.000457879	5	0.395415		0.256063	5	0.589888
WBGene00015499		0.0633725	30	3.53857		-0.0343506	30	5.94379		-1.12918	30	1.13462e+07		-0.438143	30	1539.29		0.82794	30	3.09668e-06		0.266894	30	1.13859
WBGene00000814		0.00910827	9	1.6146		0.00969811	9	1.06615		-1.17478	9	300.494		-0.552954	9	16.4523		-0.513894	9	5.68469		0.151553	9	1.04158
WBGene00194700		0.204836	4	0.573757		0.0689618	4	0.670792		-2.14277	4	363.689		-0.703918	4	5.88112		-1.33123	4	13.4367		0.31082	4	0.501106
WBGene00015001		-0.110837	3	1.50566		-0.0496594	3	1.02268		-0.140631	3	0.90802		-0.0191353	3	0.651842		-0.0361034	3	0.408645		-0.0440813	3	1.02111
WBGene00006932		0.323699	17	0.198039		-0.517853	17	601.816		-1.70241	17	1.82069e+06		-1.38252	17	408189		0.473843	17	0.00809826		0.209456	17	1.20182
WBGene00016155		1.47468	12	0.000134007		1.39998	12	7.75598e-06		0.561109	12	0.0252396		-0.0601094	12	1.33166		1.1733	12	0.000246288		0.521456	12	0.178478
WBGene00006492		-1.70178	9	16271		-1.04426	9	1616.61		-1.03506	9	148.218		-0.674474	9	32.139		-0.266648	9	1.64522		-0.559965	9	21.2111
WBGene00016154		0.0808306	11	1.19912		-0.17867	11	5.29425		-0.0961469	11	1.4949		-0.952295	11	395.607		0.0654019	11	0.306121		-0.258571	11	9.18786
WBGene00000429		-0.00553531	11	2.04296		-0.434548	11	41.5459		-0.414737	11	9.80428		-0.801512	11	149.418		0.677307	11	0.00800916		-0.125745	11	4.74911
WBGene00016156		0.72676	5	0.0776209		-0.623842	5	18.137		-0.375995	5	2.42675		-2.0888	5	1276.15		0	5	0.394847		0.480749	5	0.316539
WBGene00016157		0.2212	9	0.514974		0.534058	9	0.0278823		-0.168526	9	1.85055		-0.917011	9	122.305		-0.00869303	9	0.451251		0.683256	9	0.109547
WBGene00016158		0.0523377	6	1.08261		-0.849138	6	88.5154		-1.48207	6	195.196		-0.483667	6	5.02912		-0.193227	6	0.810563		-0.391402	6	4.63951
WBGene00016159		0.290993	19	0.24265		0.0964599	19	0.555787		-0.710247	19	823.795		-1.31155	19	789560		0	19	0.540912		0.256144	19	0.915894
WBGene00023409		0.154151	7	0.716037		-0.249478	7	4.45244		-0.62787	7	10.3497		-0.894007	7	42.7552		0	7	0.413007		0.111733	7	1.04156
WBGene00022749		-0.0562671	5	1.55146		-0.370586	5	5.45429		-0.164692	5	1.19106		0.107959	5	0.452991		0	5	0.394847		0.0118604	5	1.16037
WBGene00022750		-0.262516	30	296.909		-0.643857	30	475723		-0.346693	30	209.171		-0.302103	30	188.021		-0.171764	30	8.92		0.378174	30	0.301924
WBGene00001819		0.399176	13	0.143387		0.137853	13	0.391737		0.89855	13	0.00211669		-0.786463	13	308.581		-0.213346	13	2.05713		0.579995	13	0.1197
WBGene00022751		0.696298	3	0.129071		1.18647	3	0.0113375		1.23995	3	0.0278786		0.571586	3	0.134727		-1.28722	3	6.38267		1.4985	3	0.0440387
WBGene00022752		0.122865	6	0.804166		-1.09021	6	317.277		1.08383	6	0.0116477		0.211646	6	0.292794		-2.36019	6	2005.62		1.01161	6	0.0569075
WBGene00022748		-0.294994	3	2.63725		0.501535	3	0.137372		-0.234102	3	1.14953		-0.358668	3	1.61319		-0.240621	3	0.640429		0.909685	3	0.146204
WBGene00022753		1.50129	9	0.000520554		0.904275	9	0.00212832		1.33117	9	0.000939196		1.8153	9	3.53832e-05		2.17718	9	7.82978e-06		1.41615	9	0.00491382
WBGene00022754		-0.482991	4	6.09024		-1.48642	4	456.129		-0.0551829	4	0.776431		-0.30327	4	1.66986		-0.182734	4	0.628464		-2.37881	4	322.27
WBGene00020840		2.32449	6	7.4893e-05		1.44899	6	0.000458884		0.451013	6	0.128243		0.622198	6	0.0546249		-1.22861	6	33.8992		1.71483	6	0.00626868
WBGene00020841		1.0123	5	0.0260402		0.4582	5	0.106918		-1.75719	5	254.347		-1.27839	5	68.1113		0.141231	5	0.253553		-0.617792	5	6.6404
WBGene00006044		-0.157916	5	2.28877		-0.961035	5	89.813		-1.1031	5	28.0947		-1.60505	5	221.926		1.49731	5	0.00360627		0.250657	5	0.59879
WBGene00044611		0.0787967	3	0.8454		0.0634512	3	0.677374		-0.237815	3	1.16035		-0.253119	3	1.21716		0	3	0.377486		0.0509816	3	0.841273
WBGene00020842		-0.0837473	6	1.92145		0.00218524	6	0.975245		-0.459304	6	4.04284		-0.364407	6	3.088		-0.0636257	6	0.507962		0.530467	6	0.257407
WBGene00020843		-0.00934249	4	1.19723		0.00799867	4	0.866179		-0.510202	4	2.96623		-0.603507	4	4.28969		0	4	0.386069		0.0142107	4	1.02241
WBGene00020839		-0.647839	16	557.105		-0.25145	16	24.2187		-1.0282	16	3847.5		-0.315441	16	16.5883		0.628351	16	0.00274261		-0.78045	16	959.603
WBGene00020838		0.332275	17	0.184096		-0.471207	17	354.295		-0.709649	17	418.729		-0.266063	17	12.6504		-0.970682	17	2580		0.335978	17	0.485372
WBGene00003878		0.480593	20	0.0372472		-0.536239	20	2080.58		-1.02468	20	24384.5		-1.07665	20	123136		0.247488	20	0.0445234		0.583441	20	0.0631935
WBGene00018981		0.696159	4	0.106148		-0.514928	4	7.76084		-1.69795	4	98.1039		-0.742871	4	6.64694		0	4	0.386069		0	4	1.05794
WBGene00018982		0.931707	4	0.0472703		-0.63613	4	12.9012		-0.0477385	4	0.75959		-0.318623	4	1.7524		0	4	0.386069		-1.19005	4	18.4934
WBGene00018980		0.764297	8	0.0344859		-0.565738	8	40.5555		-2.02975	8	9291.04		-0.165497	8	1.73037		0.760771	8	0.0133045		-0.0657387	8	2.2519
WBGene00018979		0.43092	3	0.289476		-0.319046	3	2.72795		-0.192668	3	1.03542		-0.617045	3	3.21486		0	3	0.377486		0.850136	3	0.165067
WBGene00050896		1.12916	4	0.0239927		-0.476889	4	6.61662		-1.21985	4	23.991		-1.28861	4	36.9329		-0.208371	4	0.672929		1.59528	4	0.0228456
WBGene00018978		-0.617849	5	13.2935		-0.334804	5	4.60267		0.202044	5	0.346317		-0.913442	5	18.2015		0.290206	5	0.158914		1.48318	5	0.0196927
WBGene00045498		-0.155016	8	3.41013		-0.287841	8	6.85319		-0.495923	8	7.58592		-1.23661	8	381.151		-0.82825	8	18.224		0.234347	8	0.705126
WBGene00020379		-0.738744	17	1678.8		-0.152527	17	9.49177		-0.568866	17	127.64		-0.821915	17	2222.68		0.26852	17	0.049047		1.37301	17	0.000287477
WBGene00020380		-1.60282	6	1161.09		-1.51795	6	3056.23		-1.85828	6	812.477		-1.37822	6	195.117		-0.376097	6	1.56733		1.20994	6	0.0305483
WBGene00020381		0.494811	10	0.104863		0.776557	10	0.00353657		0.0968319	10	0.480956		0.293632	10	0.14019		0.632885	10	0.0137336		1.29781	10	0.00571546
WBGene00020382		0.12652	7	0.81323		0.903475	7	0.00526033		-0.488405	7	5.75088		0.283459	7	0.198404		1.90372	7	0.000176371		0.692585	7	0.136142
WBGene00020378		-0.064649	1	1.06827		0.00973643	1	0.755939		-0.13884	1	0.748426		-0.0450409	1	0.619408		0	1	0.360888		0.0223401	1	0.705644
WBGene00020377		-0.455226	8	15.2863		-0.644718	8	67.2204		-1.38789	8	474.023		-0.41902	8	6.20438		-0.361096	8	2.18025		-0.0332006	8	1.9855
WBGene00020383		0.1209	6	0.810858		-0.0797607	6	1.50514		-0.544593	6	5.58597		-0.642956	6	9.64718		0	6	0.403825		-0.0114621	6	1.40891
WBGene00000500		-0.240637	8	5.23107		-0.728509	8	114.9		-1.79078	8	3068.6		-1.40916	8	908.963		-0.967623	8	34.3366		0.266941	8	0.621577
WBGene00020376		0.337551	9	0.275128		-0.0669747	9	1.81641		-0.319336	9	3.96825		-0.805826	9	66.278		0.0734973	9	0.298823		1.60188	9	0.00223749
WBGene00020375		0.538801	11	0.0710933		-0.591876	11	147.453		-0.775113	11	82.2905		-0.415655	11	12.368		0.572628	11	0.0149373		2.1693	11	5.30337e-05
WBGene00020259		-0.130335	27	33.6436		0.419387	27	0.00230198		0.419129	27	0.00743353		0.3141	27	0.0191191		-0.267055	27	23.6247		0.042535	27	11.9045
WBGene00020260		0.916189	12	0.00522714		-0.244467	12	10.7988		-0.26494	12	4.6935		-0.894617	12	432.85		1.08654	12	0.000430045		0.884752	12	0.025698
WBGene00000632		0.00120091	3	1.07061		0.0181886	3	0.798771		-0.00573957	3	0.646075		-0.299229	3	1.37655		0	3	0.377486		0.361525	3	0.446783
WBGene00020261		0.171282	6	0.655694		-0.399502	6	8.18332		0.140869	6	0.415552		0.553221	6	0.0724266		0.560283	6	0.0535539		-0.58517	6	8.51999
WBGene00020258		0.0722944	8	1.0951		0.0172021	8	0.973436		-0.368025	8	4.19286		-0.490571	8	8.89632		-0.258174	8	1.36566		-0.187071	8	3.60117
WBGene00020347		0.269403	16	0.323737		-0.38212	16	99.4156		-1.00182	16	3114.16		-0.710019	16	539.669		0.808964	16	0.000612235		1.04909	16	0.00379491
WBGene00020348		-0.748064	5	21.8753		-0.0850393	5	1.40727		-2.7049	5	6190.64		-2.10574	5	1356.74		-0.156286	5	0.644607		-0.0345908	5	1.31973
WBGene00001497		-0.0792274	10	2.89223		-0.310624	10	12.299		-1.19085	10	558.701		-1.61434	10	12737.1		-0.702385	10	20.8093		-0.464825	10	19.0502
WBGene00206356		0.149715	2	0.669418		-0.0731857	2	1.01965		-1.59141	2	17.3901		-0.859477	2	3.93148		-0.138159	2	0.468565		0.514867	2	0.348248
WBGene00020346		0.333559	21	0.146557		-0.0600802	21	4.60018		-0.641409	21	802.977		-0.805254	21	10218.4		-1.28119	21	477477		-0.931134	21	27526.8
WBGene00004486		-0.683863	5	17.1121		-0.580722	5	14.7814		0.130558	5	0.440598		-1.04436	5	29.2211		-1.68861	5	78.7687		-1.98523	5	293.429
WBGene00020349		0.815245	9	0.0209781		-0.618921	9	84.1309		-1.04066	9	152.476		-0.176692	9	2.06918		-1.10221	9	108.643		-1.42236	9	818.432
WBGene00020345		0.00138055	8	1.56082		-0.334703	8	9.24916		-0.38064	8	4.44537		0.017015	8	0.690094		-0.387757	8	2.46112		0.147262	8	0.987665
WBGene00020350		-0.0481002	2	1.13139		0.220342	2	0.411557		1.40465	2	0.0321394		0.38368	2	0.256643		0.739783	2	0.102855		0	2	0.823481
WBGene00000633		0.524021	9	0.100741		1.03694	9	0.000846593		0.294922	9	0.177498		0.0266459	9	0.67483		0.664421	9	0.0154322		-0.75808	9	49.0912
WBGene00016752		-0.00618911	2	1.01233		0.145232	2	0.519105		-0.787258	2	3.21132		-2.09231	2	58.8758		0	2	0.369094		0	2	0.823481
WBGene00016751		0.0879808	41	4.00529		-0.242836	41	2096.4		-0.633386	41	319344		-0.455453	41	33042.5		-0.445819	41	6742.72		0.467955	41	0.0622809
WBGene00005000		-1.86592	6	3520.29		-1.07901	6	299.014		-0.674231	6	9.13106		-0.726012	6	13.5492		-1.39579	6	61.9446		1.701	6	0.00654656
WBGene00000583		0.198695	6	0.584132		-0.267477	6	4.06718		-0.626107	6	7.60843		-0.953239	6	34.3154		-0.1117	6	0.604108		0.401082	6	0.386261
WBGene00016754		0.0785091	1	0.772739		0.59175	1	0.172397		-0.713511	1	1.96318		-0.20573	1	0.816825		0	1	0.360888		0.321567	1	0.477492
WBGene00003059		0.59228	5	0.12983		1.17044	5	0.00364335		0.598133	5	0.0912173		0.748003	5	0.044767		-0.434724	5	1.5436		1.44072	5	0.0221508
WBGene00016750		0.672248	12	0.0258966		-1.01116	12	7903.01		-0.374684	12	9.39715		-0.719441	12	128.541		1.89562	12	2.37838e-06		0.663116	12	0.0838276
WBGene00016749		-0.526995	11	50.98		-0.527749	11	87.9882		-0.572419	11	24.8703		-1.11479	11	1129.71		-0.139308	11	1.03573		0.279697	11	0.633555
WBGene00016753		-0.0245055	7	1.6306		-0.0778004	7	1.63182		0.00312208	7	0.725001		-0.652707	7	14.2166		-0.255958	7	1.17218		0.419718	7	0.3541
WBGene00006689		-0.187031	4	2.20396		-0.0804488	4	1.2551		-0.603428	4	3.90362		-1.00677	4	15.2325		0.292319	4	0.17707		0.397172	4	0.407162
WBGene00015688		0.338152	8	0.290054		-0.0383144	8	1.38856		1.10058	8	0.00463199		0.0654987	8	0.540573		-0.572643	8	5.70279		1.72305	8	0.00222104
WBGene00015689		-0.0375033	6	1.58111		0.66283	6	0.0294943		0.274798	6	0.250114		0.692515	6	0.0409733		2.59	6	3.55028e-05		0.538573	6	0.250945
WBGene00015687		-0.546187	16	243.972		0.0251753	16	1.21844		-0.678578	16	233.362		-1.20475	16	42494.6		-1.28853	16	22384.5		-0.143604	16	12.6298
WBGene00015686		-0.197273	15	12.3021		-0.680429	15	1635.76		-0.436456	15	26.8856		-0.988159	15	3785.37		-0.0792279	15	0.919571		0.967511	15	0.00831047
WBGene00004068		0.367189	11	0.20494		0.53942	11	0.0163258		-0.728429	11	62.4686		-0.976896	11	463.718		0.194915	11	0.141576		0.0174119	11	2.33196
WBGene00005272		-0.0533781	3	1.26408		-0.386577	3	3.48861		-1.19491	3	12.9828		-0.635301	3	3.37537		0.07395	3	0.320883		0.00288798	3	0.927901
WBGene00005274		-0.0584889	1	1.05349		-0.0340929	1	0.844949		-0.227531	1	0.868531		-0.153958	1	0.747166		0	1	0.360888		0.180909	1	0.573719
WBGene00005273		0.337497	5	0.34405		-0.363818	5	5.28192		-1.07071	5	25.1912		-0.65244	5	7.08315		0	5	0.394847		1.12115	5	0.0536903
WBGene00015690		0.230211	4	0.525873		0.0176352	4	0.831876		-0.73302	4	5.71814		-0.673558	4	5.34597		0.237665	4	0.204851		0	4	1.05794
WBGene00015685		0.0886398	5	0.891298		-0.323017	5	4.35234		0.0907297	5	0.503853		0.0166353	5	0.630238		0.00787756	5	0.385212		0.487104	5	0.311015
WBGene00017817		0.713908	8	0.0443606		0.37507	8	0.0986151		0.302515	8	0.187289		0.647038	8	0.0288926		-0.746768	8	12.5835		1.56944	8	0.00402438
WBGene00000634		0.57481	6	0.119644		-0.555228	6	18.667		-1.15662	6	56.8435		-1.10811	6	64.6463		-1.45629	6	77.0446		0.693222	6	0.15449
WBGene00005171		0.180124	6	0.631702		-0.0262383	6	1.13366		-0.306662	6	2.26669		-0.333933	6	2.72617		-0.00568213	6	0.412184		-0.0318178	6	1.50181
WBGene00002073		0.667082	12	0.0267892		0.158888	12	0.336063		-0.339438	12	7.51908		-0.665697	12	88.5662		-0.521004	12	13.131		0.340318	12	0.469077
WBGene00017816		0.829586	15	0.00438307		1.20424	15	6.59308e-06		-0.731802	15	253.231		-0.0393642	15	1.37004		0.423707	15	0.0178944		2.91103	15	3.08546e-08
WBGene00002601		0.275737	9	0.38386		-0.106191	9	2.38543		-0.468414	9	8.43519		-0.671988	9	31.7018		-0.0998335	9	0.712714		0.600129	9	0.155782
WBGene00017815		0.0383573	2	0.899494		0	2	0.813222		0.435855	2	0.245954		-0.0801897	2	0.710532		-0.0721262	2	0.41806		0.167794	2	0.622077
WBGene00194703		0.323124	2	0.422574		0.554901	2	0.146329		-0.369252	2	1.33457		-1.01125	2	5.48599		-0.467131	2	0.827051		2.49601	2	0.0126966
WBGene00000254		0.579566	55	7.39165e-05		0.202446	55	0.0152124		-0.445566	55	224201		-0.42628	55	525205		-0.0576755	55	5.64165		0.70965	55	0.000199737
WBGene00003499		1.51949	11	0.000167601		0.346715	11	0.077037		0.525417	11	0.0381103		0.960501	11	0.00170991		-0.0954047	11	0.797477		0.553613	11	0.162462
WBGene00019396		0.134556	3	0.71344		0.185836	3	0.43376		-0.124483	3	0.871767		-0.223472	3	1.12456		-0.0646069	3	0.435052		0.297558	3	0.50899
WBGene00019395		-0.610774	8	33.2565		0.138429	8	0.448199		-1.48573	8	746.095		-0.960132	8	94.6969		-0.222542	8	1.16147		0.391633	8	0.383667
WBGene00019394		-0.241762	4	2.65972		-0.105599	4	1.3947		0.460955	4	0.169751		-0.0904297	4	0.855479		-0.00603561	4	0.392333		0.122036	4	0.788936
WBGene00019399		-0.433669	12	36.6408		-0.882592	12	2614.82		0.372357	12	0.0832999		-0.286451	12	6.39296		-1.14242	12	711.152		0.264021	12	0.704711
WBGene00022586		0.389464	6	0.261358		-0.868421	6	98.0318		-0.918018	6	23.0073		-0.396356	6	3.51901		-0.267908	6	1.06105		2.00559	6	0.00251815
WBGene00001596		0.415295	61	0.00204488		-0.10242	61	539.666		-0.356336	61	77061.9		-0.371212	61	423297		0.390155	61	1.42972e-05		0.529174	61	0.0059497
WBGene00022592		0.19616	25	0.583777		-0.189714	25	49.1977		0.0302751	25	0.977047		-0.289352	25	64.1064		0.431265	25	0.00278598		0.247358	25	1.20866
WBGene00303104		-0.814964	1	5.83238		-0.443044	1	2.38727		-1.21226	1	4.53359		-0.684552	1	1.86277		1.38315	1	0.0633864		0.903954	1	0.223272
WBGene00022591		0.256463	3	0.492285		-0.928211	3	25.0826		-0.985548	3	7.65502		-0.55943	3	2.75666		0.880955	3	0.0545008		-0.338675	3	1.86121
WBGene00022594		0.696498	3	0.128992		0.449738	3	0.165893		-0.158069	3	0.948863		-1.32625	3	21.3394		0.0159565	3	0.364483		-0.0222666	3	0.976707
WBGene00004721		-0.364628	7	7.8124		-0.500651	7	19.3365		-1.60391	7	632.244		-1.20328	7	175.341		-0.0373003	7	0.480815		0.261963	7	0.615362
WBGene00022593		0.0606303	19	2.06486		-0.251868	19	42.6514		-0.758178	19	1285.49		-0.93408	19	16509.6		-0.1578	19	2.50422		0.523391	19	0.110939
WBGene00019992		-0.835164	1	6.10509		-0.0832743	1	0.957364		0.131592	1	0.475403		-0.587549	1	1.57626		-0.490863	1	0.669031		-1.77031	1	7.32432
WBGene00019993		-0.00444252	3	1.08916		-0.446337	3	4.33686		-1.19971	3	13.1409		-1.05177	3	10.2574		0	3	0.377486		0.198182	3	0.623247
WBGene00018156		0.842373	17	0.00239344		0.335677	17	0.0370759		-0.0521862	17	1.63098		-0.683269	17	612.294		-0.32506	17	8.95333		1.49276	17	0.000121875
WBGene00018157		0.342345	10	0.253076		-0.012	10	1.30966		-0.107836	10	1.47665		-0.828087	10	115.289		-0.000947905	10	0.444127		0.306581	10	0.547197
WBGene00018158		-0.0821512	6	1.90856		0.381226	6	0.131034		-0.256999	6	1.87773		0.142482	6	0.388511		-0.0198546	6	0.433796		0.392185	6	0.397193
WBGene00004924		0.323089	19	0.180059		0.228165	19	0.107688		-1.86426	19	3.70326e+07		-1.79345	19	1.10091e+08		-0.600945	19	185.23		0.183794	19	1.62194
WBGene00020742		0.204365	19	0.54284		-0.223537	19	29.965		-0.967653	19	8987.44		-0.375189	19	53.8013		-0.470256	19	52.0606		-0.0387619	19	9.40788
WBGene00003798		0.954932	37	2.41379e-06		0.613135	37	4.83903e-06		0.117366	37	0.295544		-0.407508	37	4855.19		1.01726	37	7.64696e-09		-0.188177	37	1009.65
WBGene00020743		0.341493	11	0.240144		0.852597	11	0.00131157		0.0417285	11	0.662408		-0.958424	11	411.579		1.5962	11	3.36868e-05		0.0851649	11	1.66544
WBGene00004273		0.261084	4	0.47297		0.393658	4	0.171903		0.164797	4	0.406148		-0.506236	4	3.15992		0.000147931	4	0.385917		0.39595	4	0.408361
WBGene00019432		0.240416	11	0.448008		0.102703	11	0.549455		-0.0119067	11	0.909151		-0.02284	11	0.978765		-0.107697	11	0.858035		0.903421	11	0.0285735
WBGene00019433		-0.519547	12	64.3619		-0.185444	12	6.49925		-0.106997	12	1.72814		0.352787	12	0.0761268		-0.2783	12	2.7618		0.527346	12	0.172957
WBGene00019431		0.574945	3	0.186739		-0.0916444	3	1.19165		0.125204	3	0.464298		0.61169	3	0.121052		0.0292089	3	0.354025		-0.180876	3	1.34939
WBGene00019430		0.808864	9	0.0217119		2.12761	9	4.32601e-07		0.199553	9	0.287543		0.484451	9	0.0541536		-1.51523	9	862.038		-0.236822	9	5.39669
WBGene00000386		0.224142	12	0.489646		-0.0968236	12	3.03231		-0.399152	12	10.9703		-0.905544	12	466.905		-2.08762	12	308247		0.185136	12	1.07343
WBGene00019429		0.687263	18	0.00739488		0.683278	18	0.000515033		0.621944	18	0.00439813		-0.0532601	18	1.86422		-1.07747	18	11168.9		0.562078	18	0.0885901
WBGene00019434		0.735874	53	2.92842e-06		0.544067	53	4.0562e-07		-0.151098	53	135.405		-0.244003	53	2664.5		-0.0829509	53	9.7778		0.398221	53	0.148002
WBGene00016945		0.389422	8	0.224497		0.472777	8	0.0527785		-0.722529	8	21.6887		-0.661725	8	21.0667		0.163153	8	0.201218		0.302023	8	0.542675
WBGene00000937		0.593919	9	0.0691277		1.31726	9	0.000120689		1.02629	9	0.00439055		-0.622189	9	24.0941		-0.768403	9	20.3708		1.85925	9	0.000752171
WBGene00007018		1.19047	7	0.00604954		-0.594472	7	33.4663		-0.503274	7	6.12268		-0.432293	7	5.19984		-0.229726	7	1.05333		0.368073	7	0.424323
WBGene00016944		1.08383	7	0.00988699		0.646919	7	0.0235755		-0.57789	7	8.38442		0.143636	7	0.37553		-0.0110736	7	0.432073		0.817537	7	0.087881
WBGene00016943		0.224202	10	0.500892		0.706388	10	0.00598608		0.208102	10	0.261366		0.645697	10	0.0170524		0.873715	10	0.00366566		1.56955	10	0.00163661
WBGene00016942		0.929449	8	0.0151085		0.360048	8	0.108563		0.847753	8	0.0149549		0.765699	8	0.0158937		0.56467	8	0.0324409		0.472957	8	0.280088
WBGene00016946		0.160885	9	0.71272		1.10879	9	0.000513828		-0.314625	9	3.8748		-0.209876	9	2.48434		-0.804299	9	24.3885		1.40228	9	0.00521107
WBGene00001627		-0.00716234	7	1.5054		-0.433144	7	13.0306		-0.975297	7	44.7352		-1.02838	7	78.9374		-0.778969	7	9.87895		0.177673	7	0.826737
WBGene00016947		0.257775	4	0.478375		-0.169413	4	1.82261		-1.10289	4	16.9989		-1.17746	4	26.045		-0.573346	4	1.78085		0.768208	4	0.166864
WBGene00001599		1.54761	19	2.0529e-06		0.82493	19	6.34883e-05		-0.952308	19	7794.06		-0.29139	19	22.7987		-0.288201	19	8.88506		0.631473	19	0.0472407
WBGene00000483		0.202523	10	0.567741		0.137035	10	0.428256		-1.11292	10	364.493		-0.638165	10	37.0021		-0.360226	10	3.18619		-0.841049	10	107.605
WBGene00020415		0.173975	2	0.627692		0.195854	2	0.443917		0.125864	2	0.471688		0.159074	2	0.420213		-0.0359442	2	0.392734		0.0651471	2	0.738516
WBGene00020414		0.41652	13	0.127103		0.394086	13	0.0375285		-1.40011	13	11550.6		-0.229988	13	5.01048		-0.956772	13	345.895		-0.60788	13	104.506
WBGene00020416		0.538296	4	0.182544		1.42848	4	0.00224267		0.313186	4	0.262332		-0.517095	4	3.26961		0	4	0.386069		1.11368	4	0.0727193
WBGene00020417		-0.248456	8	5.4395		0.119659	8	0.505386		0.732489	8	0.0255179		1.02064	8	0.00440104		-0.411968	8	2.74741		-0.424612	8	9.02862
WBGene00271694		0.191323	3	0.600234		-0.579009	3	7.03118		-0.18521	3	1.01612		-0.0130881	3	0.641407		-0.0693009	3	0.439561		0.202815	3	0.61739
WBGene00020413		0.329665	17	0.188232		-0.158627	17	10.1728		-0.970906	17	3796.6		-1.56411	17	2.20894e+06		-0.16015	17	2.10729		0.338925	17	0.475227
WBGene00020418		0.390962	6	0.259713		0.0445356	6	0.779318		-0.0663409	6	0.911494		-0.422641	6	3.91836		-0.154102	6	0.703909		0.675953	6	0.16309
WBGene00020412		0.309589	10	0.305814		-0.0110264	10	1.30013		-0.18064	10	2.20076		-0.243674	10	3.49174		0.800826	10	0.0054672		1.59683	10	0.00144349
WBGene00020411		0.164792	9	0.697873		-1.12505	9	2834.23		-1.75813	9	5745.62		-0.869936	9	94.3609		0.165874	9	0.188029		0.792297	9	0.0690265
WBGene00020419		0.420293	11	0.147688		-0.719319	11	411.416		-1.67551	11	16741.1		-1.47748	11	11751.5		-0.363269	11	3.92988		0.102649	11	1.52687
WBGene00019005		-0.364709	8	9.72427		-0.197765	8	3.85131		-1.24913	8	249.144		-0.493814	8	9.04282		0.0939589	8	0.275582		0.139561	8	1.01754
WBGene00019006		-0.233825	5	3.05985		-0.732022	5	30.3015		-0.201618	5	1.3488		0.258655	5	0.262685		-0.330326	5	1.11261		0.10951	5	0.885326
WBGene00019007		0.471589	4	0.229542		-0.0411764	4	1.06454		-0.119793	4	0.939199		1.04423	4	0.0241929		-0.727337	4	2.68508		0.180741	4	0.685088
WBGene00000896		-0.0332922	2	1.0878		0.0125844	2	0.782197		-0.206615	2	0.948355		0.198376	2	0.385478		-0.217965	2	0.537814		0.194713	2	0.594706
WBGene00006607		-0.399183	8	11.5524		-0.0603368	8	1.59866		-0.512043	8	8.17454		-0.102351	8	1.25896		-0.642749	8	7.84284		-0.0819037	8	2.39725
WBGene00019004		-0.151365	13	6.58263		-0.228542	13	11.2091		-0.612523	13	56.7972		-0.80594	13	356.452		-0.98138	13	409.841		0.892906	13	0.0201078
WBGene00019003		-1.19727	7	361.86		-1.10097	7	646.731		-0.822852	7	23.5344		-1.20843	7	179.517		-0.362533	7	1.8098		0.0984753	7	1.09108
WBGene00000236		-0.742593	3	10.2992		-1.34017	3	112.456		-1.35023	3	19.2115		-1.66396	3	52.5539		-0.0758328	3	0.445914		0.492255	3	0.342292
WBGene00003184		0.546198	5	0.154856		-0.24919	5	3.06624		-0.159829	5	1.17171		-0.368449	5	2.53655		-0.235914	5	0.827466		-0.0159612	5	1.25334
WBGene00019002		0.514977	14	0.0565708		-0.459624	14	125.666		-0.8403	14	390.492		-0.360952	14	16.2965		-1.24408	14	4598.45		0.144552	14	1.54032
WBGene00019001		-0.00442915	13	2.37057		-0.459536	13	92.8677		-0.771533	13	166.095		-0.543355	13	51.0024		0.168327	13	0.148116		-0.692663	13	169.455
WBGene00002783		-0.458728	29	3311.61		-0.315461	29	868.993		-0.994177	29	1.09662e+06		-0.712279	29	73119.5		-0.823467	29	96280.4		0.393213	29	0.257122
WBGene00006624		0.556508	6	0.129241		0.419284	6	0.107116		0.0712515	6	0.541048		-0.998997	6	41.3768		0.78927	6	0.023453		0.342164	6	0.46467
WBGene00018582		-0.0849169	28	21.3473		-0.154738	28	42.3153		-0.531397	28	1629.19		-1.08782	28	1.16666e+07		-0.470592	28	467.415		0.256194	28	1.21479
WBGene00017066		0.208672	18	0.524404		0.169188	18	0.234881		-0.291758	18	14.4375		-0.511231	18	163.748		-0.596957	18	131.632		0.0900935	18	3.10024
WBGene00017065		-0.095573	10	3.17873		-0.0105271	10	1.29527		-1.36311	10	1436.2		-1.84089	10	49409.6		-0.133702	10	0.919842		0.78357	10	0.0609285
WBGene00006645		-0.0534426	3	1.26433		-0.462846	3	4.60563		-0.94804	3	6.96379		-0.744305	3	4.51507		-0.138346	3	0.511556		0.0115464	3	0.911672
WBGene00017068		0.0242836	3	0.997975		1.23829	3	0.00938743		-0.966795	3	7.30125		-0.61126	3	3.16561		-1.10922	3	4.31699		2.39221	3	0.0071265
WBGene00000050		0.123197	9	0.873181		-0.219601	9	5.24602		-0.807275	9	46.8279		-0.252011	9	3.1336		-0.270311	9	1.67572		0.325579	9	0.498386
WBGene00017064		0.0493493	7	1.16037		-0.453687	7	14.6936		-0.593332	7	8.94805		-0.662068	7	14.837		0.500692	7	0.0536718		0.510271	7	0.257847
WBGene00044610		0.0134299	5	1.1884		-0.141592	5	1.84036		-0.925995	5	15.4726		-0.711645	5	8.77408		0.426255	5	0.103719		0	5	1.19913
WBGene00017063		0.182819	15	0.65107		-0.0806333	15	3.48447		-0.952135	15	1349.38		-1.02612	15	5197.7		-0.297653	15	5.08882		0.119645	15	1.94363
WBGene00006625		0.134889	4	0.729551		-0.208423	4	2.14651		0.46198	4	0.169239		-0.240256	4	1.36988		-0.00465436	4	0.39089		0.322763	4	0.486921
WBGene00195178		0.582018	5	0.135028		-1.09126	5	166.596		-1.32361	5	59.0458		-0.529186	5	4.53593		-0.3085	5	1.039		1.85561	5	0.00701767
WBGene00022633		0.36669	15	0.157104		0.671596	15	0.00155449		0.0106019	15	0.901996		-0.0948812	15	2.17821		0.132324	15	0.175362		0.839853	15	0.0188934
WBGene00022632		0.907528	13	0.00418769		-0.515882	13	155.548		-0.166189	13	2.79388		0.121959	13	0.369914		1.1394	13	0.000183392		0.714944	13	0.0554599
WBGene00022634		1.61045	9	0.000289102		-0.174623	9	3.83788		-0.724602	9	30.824		-0.60842	9	22.3337		-2.20035	9	26771.3		-0.184487	9	4.32368
WBGene00022631		0.340343	6	0.321493		0.342688	6	0.160699		0.0185294	6	0.660742		-0.0895717	6	1.00357		2.28616	6	0.000106186		-0.735086	6	13.6354
WBGene00022635		0.409486	24	0.053012		-0.252441	24	109.667		-0.133682	24	6.18637		-0.381773	24	172.524		0.505094	24	0.0013693		-0.126006	24	44.1594
WBGene00015907		0.00119159	2	0.992703		-0.273137	2	1.89172		-0.771522	2	3.10691		-0.20834	2	0.941374		-0.231179	2	0.550231		0.159623	2	0.630631
WBGene00015908		-0.240937	3	2.23716		-0.246673	3	2.09586		-0.210776	3	1.08383		-0.465737	3	2.14677		0	3	0.377486		-0.123759	3	1.20113
WBGene00020712		0.43939	20	0.0555148		0.066501	20	0.81677		-0.477359	20	120.217		-0.740521	20	3354.09		-0.0834792	20	1.29421		0.592181	20	0.0587899
WBGene00020713		-0.0317943	2	1.08349		0	2	0.813222		-0.465278	2	1.63285		-0.316086	2	1.19258		0	2	0.369094		0	2	0.823481
WBGene00020714		-0.118188	5	1.9661		0.311153	5	0.214801		-0.723109	5	7.81235		-1.18487	5	48.5687		0	5	0.394847		0.587499	5	0.235497
WBGene00255605		0.444311	4	0.252085		-0.838841	4	30.1847		0.185016	4	0.382664		-0.515875	4	3.2571		-1.70713	4	36.6108		-0.418488	4	2.89342
WBGene00020710		-0.0071411	5	1.28568		0.0535878	5	0.729023		-1.76784	5	263.638		-0.593168	5	5.71669		0.0674944	5	0.319522		0.245768	5	0.606956
WBGene00020709		-0.709748	9	77.6484		-0.841638	9	395.46		-1.13774	9	249.154		-0.365492	9	5.85615		-1.09454	9	104.546		-0.215982	9	4.94072
WBGene00020933		-0.127612	14	6.32961		-0.52668	14	240.904		-0.974759	14	1024.14		-1.03562	14	3314.53		-0.602254	14	40.7559		0.452139	14	0.238303
WBGene00303103		0.676344	1	0.199837		-1.52597	1	37.3556		1.00038	1	0.110638		-0.560052	1	1.50337		0.517213	1	0.188325		0.52058	1	0.368259
WBGene00003170		-0.19137	13	8.69279		-0.616726	13	391.527		-1.13448	13	1923.51		-0.803153	13	349.172		-0.0474708	13	0.655633		-0.252125	13	13.7509
WBGene00002258		-0.9331	5	44.3952		0.976241	5	0.00915465		-1.73122	5	233.045		-2.28276	5	2573.33		-0.846428	5	5.61415		1.5123	5	0.0181659
WBGene00007057		-0.207576	2	1.72724		-0.0112862	2	0.842091		-0.384023	2	1.37663		-0.437623	2	1.55726		-0.0823956	2	0.425541		0	2	0.823481
WBGene00002257		-0.163067	5	2.33431		-0.131066	5	1.75071		-1.7207	5	224.933		-1.49931	5	151.409		0	5	0.394847		0.468644	5	0.327335
WBGene00004883		0.496301	9	0.116969		-0.463497	9	28.569		-1.71515	9	4623.11		-0.397724	9	6.99435		0	9	0.432002		1.26195	9	0.00944222
WBGene00020932		0.0205419	10	1.62499		-0.0596778	10	1.87266		-0.635636	10	26.6442		-0.537791	10	20.2945		0.0562767	10	0.324492		0.312489	10	0.53252
WBGene00020931		0.415361	3	0.303515		-0.216013	3	1.87441		-0.0385854	3	0.701899		-0.389635	3	1.75217		-1.34273	3	7.2105		0.76975	3	0.194449
WBGene00020937		0.99308	4	0.0382869		0.820759	4	0.0286741		0.44364	4	0.178633		0.415448	4	0.174509		0.602288	4	0.0774792		0.415749	4	0.389378
WBGene00006773		0.344841	16	0.175416		0.69421	16	0.000882419		-0.401329	16	25.2834		-0.686695	16	439.27		1.02589	16	0.000101094		1.04974	16	0.0037782
WBGene00020935		-0.233388	24	73.2667		0.161733	24	0.200918		-0.954965	24	71819.7		-1.06636	24	970681		-0.125195	24	2.73942		0.277199	24	0.873273
WBGene00020936		0.52516	26	0.0111461		1.08129	26	5.62921e-08		0.416046	26	0.00889171		1.00332	26	1.86242e-06		-0.740013	26	9532.5		0.108033	26	5.3759
WBGene00001682		-0.408727	5	5.97376		-1.10672	5	179.273		0.292429	5	0.255423		-0.257252	5	1.69676		-1.52133	5	46.6136		-1.48179	5	72.7367
WBGene00017240		0.139282	7	0.766801		-0.589943	7	32.5918		-0.726026	7	15.6506		-0.758031	7	22.989		-0.151809	7	0.766753		-1.22929	7	114.257
WBGene00017239		0.000638885	3	1.07244		0.39789	3	0.200372		-1.38524	3	20.9858		-1.05365	3	10.3089		1.07789	3	0.0353601		-0.0638361	3	1.06305
WBGene00006819		-0.314375	25	222.285		-0.167682	25	34.7594		-1.627	25	3.13642e+08		-1.12252	25	3.48682e+06		-0.459816	25	196.699		0.00146406	25	14.472
WBGene00004111		0.0660496	24	2.52412		0.552488	24	0.000525683		-0.347835	24	71.0149		-0.654085	24	5353.15		0.540403	24	0.000894477		0.349167	24	0.433535
WBGene00000871		0.368383	13	0.177608		-0.534247	13	184.024		-1.3267	13	7037.77		-1.15932	13	4879.74		-0.534106	13	18.774		0.0693445	13	2.19993
WBGene00016491		0.364823	11	0.207953		0.937987	11	0.000659496		-0.331203	11	5.98757		-0.335599	11	7.37543		-1.39829	11	1865.59		0.991555	11	0.0184415
WBGene00016492		-0.391637	6	7.03619		0.940619	6	0.00677437		0.253062	6	0.271595		-0.840584	6	21.6473		1.72563	6	0.000801409		1.00691	6	0.0577525
WBGene00016493		-0.0391804	3	1.21062		0.32069	3	0.265427		-0.754869	3	4.27731		-1.48231	3	32.364		-0.037721	3	0.4101		-0.169362	3	1.3181
WBGene00004110		0.355024	30	0.0671646		0.595414	30	5.10277e-05		0.190754	30	0.117154		0.0731942	30	0.569059		-0.429515	30	412.851		0.525227	30	0.0522529
WBGene00016494		0.0890583	6	0.927348		-0.597737	6	23.3797		-1.01787	6	33.5932		-0.588749	6	7.72903		-0.0841148	6	0.546911		-0.347794	6	4.04637
WBGene00017098		0.26194	16	0.343966		-0.199488	16	13.8123		-1.55858	16	270153		-1.07864	16	13963		0.45679	16	0.0113964		0.922363	16	0.00898339
WBGene00019324		-0.222497	15	14.9514		-0.19948	15	11.7896		-0.689352	15	183.452		-0.906198	15	1909.1		0.151756	15	0.150602		0.439749	15	0.247869
WBGene00006740		0.0367183	5	1.08711		-0.739836	5	31.4461		-1.75178	5	249.755		-1.54246	5	176.979		-2.07514	5	264.738		0.422359	5	0.372119
WBGene00019323		0.244969	57	0.176293		-0.471504	57	8.02922e+07		-0.739378	57	6.00583e+08		-0.540727	57	2.15308e+07		-0.282702	57	3074.24		0.396544	57	0.141373
WBGene00004778		0.134744	12	0.880185		-0.168794	12	5.63196		-0.325278	12	6.87487		-0.0684793	12	1.4112		-0.0274344	12	0.551208		1.18124	12	0.00528436
WBGene00019322		0.252738	9	0.434498		0.410648	9	0.0657316		-0.62807	9	18.9159		0.204363	9	0.253455		-0.523752	9	5.97277		0.450503	9	0.293603
WBGene00001056		-0.0886138	18	7.40096		0.48157	18	0.00569015		-1.15212	18	29540.8		-1.43776	18	1.40108e+06		-1.44034	18	319489		-0.209058	18	29.513
WBGene00001075		-0.206964	10	6.05063		-0.907378	10	1080.65		-0.158862	10	1.95314		-0.301794	10	4.94403		-0.591732	10	11.3421		-0.15945	10	4.67269
WBGene00019248		-0.740271	10	131.883		-1.26316	10	15579.8		0.985033	10	0.00369756		0.438125	10	0.059049		-1.68138	10	4468.15		-2.05724	10	29010.5
WBGene00019247		0.00494158	14	2.39195		0.217741	14	0.175496		-1.07328	14	2075.82		-0.707247	14	249.413		0.0794245	14	0.269354		-0.0573279	14	5.24276
WBGene00019246		0.367875	9	0.233657		-1.11201	9	2588.71		0.425024	9	0.091915		0.177914	9	0.293222		-0.358104	9	2.6026		2.07006	9	0.000307973
WBGene00019245		0.783488	7	0.0394374		-0.852335	7	151.139		-0.796446	7	21.0565		-0.674696	7	15.7171		-0.106428	7	0.637283		-0.0968753	7	2.163
WBGene00001598		1.54663	19	2.07154e-06		0.674334	19	0.000414635		0.0301213	19	0.852672		0.734275	19	0.000622197		1.25348	19	2.79491e-06		1.37569	19	0.000132243
WBGene00044898		-0.0303786	19	4.81139		-0.0961943	19	6.13031		-1.0822	19	26030		-0.754279	19	2616.15		-0.286899	19	8.77342		0.0525823	19	4.57241
WBGene00020660		-0.875827	6	54.1791		-0.37401	6	7.14992		-1.67879	6	411.452		-0.673826	6	10.9453		-0.319874	6	1.27972		0.0498221	6	1.16251
WBGene00020661		-0.0533531	11	2.74396		0.762052	11	0.00271895		-0.861517	11	137.048		-0.65793	11	59.1207		0.340819	11	0.0593882		1.09725	11	0.0109078
WBGene00020659		-1.13585	13	6168.78		0.608715	13	0.00526166		-0.319366	13	7.85487		-0.433278	13	22.574		-0.922801	13	273.678		1.86353	13	7.94698e-05
WBGene00006423		-0.412595	25	697.258		-0.173678	25	38.2057		-0.667981	25	3749.3		-0.433431	25	422.489		-0.332753	25	40.0305		-0.157426	25	71.986
WBGene00016742		-0.228602	10	6.85652		-0.587274	10	97.9501		-0.716906	10	41.5958		-0.999782	10	322.093		-0.955099	10	83.2139		1.14	10	0.0118155
WBGene00016743		-0.205008	7	3.74502		-0.428926	7	12.7132		-0.624465	7	10.2023		-0.643409	7	13.626		-0.365776	7	1.83388		0.288461	7	0.560811
WBGene00004879		0.318026	32	0.10085		-0.38131	32	6162.56		-0.401526	32	677.092		-0.351516	32	608.315		-0.17822	32	12.1426		0.518501	32	0.0497497
WBGene00016741		-0.563092	6	14.4961		-0.410606	6	8.67896		-1.34993	6	118.281		-1.96109	6	2115.93		-0.348164	6	1.41715		0.037513	6	1.20828
WBGene00016740		0.221442	10	0.508944		0.542416	10	0.0204763		0.33545	10	0.130053		0.249232	10	0.182852		-1.04589	10	136.916		1.94796	10	0.000286833
WBGene00016744		0.165479	15	0.744485		-0.284572	15	28.2172		-0.90371	15	934.194		-0.6156	15	168.578		0.154779	15	0.147078		0.0365358	15	3.3176
WBGene00016746		0.0199716	1	0.882153		-0.415026	1	2.22329		-0.072449	1	0.669521		-0.0413843	1	0.61552		0	1	0.360888		-0.0172119	1	0.743029
WBGene00016745		-0.167907	4	2.06386		-1.11878	4	97.6307		-0.825299	4	7.50422		-1.19752	4	27.7392		-0.396634	4	1.1117		-0.367472	4	2.55944
WBGene00020399		0.0496226	7	1.15891		-0.201517	7	3.36369		-0.847433	7	26.1025		-1.08404	7	101.762		-0.554233	7	3.95308		0.347763	7	0.455614
WBGene00020398		-0.110234	15	6.27629		-0.082547	15	3.55354		-0.195512	15	4.31451		-0.171919	15	4.14499		-0.433562	15	14.7553		0.355023	15	0.427514
WBGene00020400		0.175441	9	0.658959		0.323468	9	0.12047		-1.17818	9	305.706		0.287722	9	0.160109		0.405835	9	0.056443		0.211894	9	0.806667
WBGene00020401		0.617915	6	0.099763		-0.7685	6	57.7517		-0.968119	6	27.8194		-0.644399	6	9.70428		-0.126119	6	0.636349		-1.96631	6	648.558
WBGene00020402		0.0773808	5	0.930521		0.0190168	5	0.858961		-0.214425	5	1.40826		-0.0582892	5	0.826355		-0.00728864	5	0.403977		0.143748	5	0.805206
WBGene00020403		0.207803	15	0.536697		0.399023	15	0.025449		-0.639771	15	125.897		-0.225616	15	6.49067		-0.175606	15	1.95632		-0.0143655	15	4.60304
WBGene00020397		0.828803	4	0.0673087		-0.428605	4	5.40389		-1.6321	4	80.8062		-2.33408	4	986.746		0	4	0.386069		1.96503	4	0.00939162
WBGene00020404		0.307675	12	0.283074		-0.95785	12	4995.88		-1.19432	12	1677.95		-0.635758	12	71.9696		-0.267222	12	2.57209		0.703827	12	0.0674631
WBGene00016260		0.0363375	18	2.43273		-0.194484	18	17.8589		-0.363092	18	27.1647		-0.369492	18	40.9845		-0.629548	18	177.899		0.0703206	18	3.59814
WBGene00016261		0.242352	9	0.459506		-0.739207	9	194.077		-0.766443	9	38.0894		-0.781134	9	57.8469		-1.33513	9	349.372		0.458292	9	0.284075
WBGene00016262		-0.546336	4	7.57033		0.255243	4	0.307151		-0.221328	4	1.26663		-0.838254	4	8.97003		0.288165	4	0.179042		0.304223	4	0.509117
WBGene00016263		-0.496106	4	6.37083		-0.0598657	4	1.15132		-1.75367	4	115.602		-1.16701	4	25.2033		0.134616	4	0.269633		-1.29492	4	23.796
WBGene00016266		0.180868	4	0.622984		-0.0174497	4	0.963722		-0.352152	4	1.86214		-0.618097	4	4.49094		0	4	0.386069		0	4	1.05794
WBGene00016265		-0.339603	12	19.7685		-1.00159	12	7278.2		-0.776172	12	119.127		-0.515293	12	31.2276		-0.639173	12	28.0525		-0.0662214	12	4.10314
WBGene00016264		0.181227	20	0.676629		-0.048399	20	3.6425		-0.617174	20	467.014		-0.634508	20	1076.56		0.52255	20	0.00270624		-0.0931523	20	16.9549
WBGene00010370		0.0410171	21	2.79382		-0.104511	21	8.40401		0.325225	21	0.0449413		0.0479912	21	0.727214		-0.640624	21	519.918		0.496172	21	0.122856
WBGene00010369		0.171323	31	0.823244		-0.0764031	31	14.1786		-0.403223	31	564.984		-0.424853	31	1593.42		0.145519	31	0.0759213		0.991932	31	0.000157407
WBGene00003964		0.215853	21	0.479842		0.109878	21	0.458838		-0.887445	21	9704.51		-0.763468	21	6401.14		-0.326909	21	18.3997		0.313334	21	0.595353
WBGene00008852		-0.688407	29	68693.7		-0.819222	29	7.43078e+06		-1.08169	29	3.57666e+06		-0.492047	29	2698.36		0.121452	29	0.117704		-0.218417	29	302.893
WBGene00004773		-0.297004	21	84.2192		-0.166589	21	19.5051		-0.553821	21	330.687		-0.499192	21	332.341		-0.300297	21	13.8584		0.185744	21	1.79084
WBGene00044988		-0.00882348	3	1.10378		-0.324806	3	2.78578		-0.107967	3	0.836185		-0.0148735	3	0.64447		-0.0284912	3	0.401868		0.00135596	3	0.930802
WBGene00012164		-0.371743	2	2.66992		-0.379756	2	2.63014		-0.668958	2	2.50473		-0.486775	2	1.73469		-1.08256	2	2.39424		0.139167	2	0.652568
WBGene00007024		0.760526	9	0.0281711		-0.505574	9	38.2721		-0.584348	9	15.1627		-0.622129	9	24.0862		-0.72699	9	16.5505		0.445867	9	0.299426
WBGene00012165		0.801371	15	0.00545158		-0.650394	15	1202.1		-0.375835	15	16.9669		-0.146403	15	3.34947		-0.33421	15	6.776		0.929256	15	0.0106295
WBGene00012166		0.602638	8	0.0773537		-0.285058	8	6.73224		0.792097	8	0.019357		0.938848	8	0.00664472		-1.16818	8	85.4365		0.63625	8	0.148897
WBGene00012167		0.786214	9	0.02453		-0.90436	9	611.498		0.0268943	9	0.688651		0.260975	9	0.185535		-2.00631	9	10117.5		0.138404	9	1.10124
WBGene00012168		0.39074	13	0.152046		-0.445091	13	81.3656		-0.532171	13	33.0242		-0.758358	13	250.605		-0.0444298	13	0.642032		0.255881	13	0.759566
WBGene00002198		0.842505	14	0.00510889		-0.528147	14	244.36		-1.02054	14	1422.17		-1.04987	14	3708.42		-0.301824	14	4.46145		-0.914967	14	953.71
WBGene00009050		-0.243112	5	3.1705		0.719222	5	0.03099		-1.6058	5	152.75		-1.27238	5	66.648		-0.461156	5	1.677		1.94275	5	0.00551245
WBGene00003815		0.664798	16	0.0130425		1.42695	16	3.2101e-07		0.213122	16	0.183543		0.126117	16	0.33683		0.642058	16	0.0024476		0.138965	16	1.84896
WBGene00009051		-0.63242	4	10.1744		-0.917263	4	41.9375		-1.24727	4	26.0092		-0.937157	4	12.2397		-0.941757	4	4.75627		0.90143	4	0.121133
WBGene00004186		-1.1462	16	31914.8		-0.767104	16	6373.64		-0.738612	16	377.596		-0.979908	16	5841.84		-0.798235	16	382.001		-0.771985	16	905.931
WBGene00009052		0.649518	14	0.0210684		-1.00128	14	24109.6		-1.60225	14	92167.2		-0.977431	14	2095.74		-0.178027	14	1.79307		0.887429	14	0.0169884
WBGene00043279		0.176445	3	0.62804		0.342286	3	0.24535		0.500528	3	0.180103		0.794713	3	0.0742739		0.548519	3	0.113129		0.265278	3	0.543599
WBGene00009054		0.248948	11	0.425036		0.815155	11	0.00177302		-0.28023	11	4.43165		0.290473	11	0.129424		-2.09207	11	116103		0.237243	11	0.782325
WBGene00009056		0.158773	2	0.653522		-0.0114814	2	0.842599		-0.496322	2	1.74288		-0.771236	2	3.23913		-0.00408547	2	0.371707		-0.0562623	2	0.904684
WBGene00000636		0.542677	8	0.104378		-0.607076	8	52.8337		-1.80933	8	3344.24		-1.61738	8	2594.23		-1.5174	8	417.825		0.436153	8	0.322954
WBGene00001643		0.0394932	6	1.14285		-0.237034	6	3.46162		-1.00972	6	32.5719		-1.25448	6	117.628		0	6	0.403825		0	6	1.35916
WBGene00001644		0.0889719	6	0.927685		-0.137883	6	2.04762		0.0229368	6	0.649795		0.189867	6	0.320069		0	6	0.403825		-0.0674918	6	1.67963
WBGene00010740		-0.151392	8	3.34894		0.657654	8	0.016172		0.578387	8	0.0521312		1.01125	8	0.00461422		-1.69087	8	919.206		2.46383	8	0.00012639
WBGene00001614		0.541929	15	0.0405258		0.533426	15	0.00641238		-0.937405	15	1206.59		-0.615964	15	169.09		-0.166876	15	1.82702		0.977073	15	0.00781462
WBGene00219281		-1.21475	2	24.9906		-1.03367	2	19.8504		-1.34448	2	10.3521		-2.03235	2	51.615		-0.410361	2	0.749806		0.754189	2	0.233428
WBGene00006753		-0.218543	18	23.5359		-0.470395	18	477.462		-1.05787	18	12815.8		-0.71125	18	1156.32		-0.263191	18	6.02186		-0.0512911	18	8.99308
WBGene00006394		0.0409041	4	1.00748		-0.152038	4	1.69454		-1.23621	4	25.1754		-1.70275	4	135.707		0	4	0.386069		0.240578	4	0.593294
WBGene00010738		0.300844	11	0.30859		-0.307992	11	14.9969		-1.08608	11	515.939		-1.09099	11	968.807		-0.0943663	11	0.792561		0.234315	11	0.793788
WBGene00010427		-0.0751442	24	12.3555		0.265767	24	0.0412587		-0.647239	24	2153.79		-0.542317	24	1307.17		-0.0597353	24	1.24398		-0.147724	24	54.5507
WBGene00010645		-0.857838	12	592.117		-0.539381	12	136.519		-0.30589	12	6.08135		-0.901855	12	455.119		-2.83226	12	3.68408e+07		-0.0334169	12	3.44441
WBGene00010641		0.831789	15	0.00430904		-0.151895	15	7.23683		-0.0860533	15	1.87913		0.134339	15	0.321141		1.03322	15	0.000151106		0.52062	15	0.147321
WBGene00006963		0.326695	6	0.340533		-0.207502	6	2.96047		0.133055	6	0.428044		0.344239	6	0.170242		-0.500127	6	2.45127		-0.990281	6	30.3611
WBGene00010642		0.396751	15	0.12452		-0.314401	15	38.3157		-0.460281	15	32.2173		-0.143097	15	3.25824		-0.0912342	15	1.01025		0.538456	15	0.13135
WBGene00010643		0.394257	6	0.25613		-0.319488	6	5.35686		-0.701742	6	10.1347		-0.744266	6	14.5994		1.04662	6	0.00927236		2.36837	6	0.000806993
WBGene00010644		0.587999	9	0.0713682		-0.162907	9	3.5378		-1.6253	9	2934.58		-1.39805	9	1732.24		-0.909557	9	41.3455		-0.239842	9	5.46616
WBGene00010870		0.11692	6	0.824578		0.351246	6	0.153579		-1.34241	6	114.958		-1.05465	6	51.9515		0.451835	6	0.0791808		0.218913	6	0.683986
WBGene00194654		-0.873499	5	35.3449		-0.342988	5	4.7849		-1.2496	5	46.018		0.0222211	5	0.617636		-2.04854	5	243.553		1.3652	5	0.027306
WBGene00010869		0.867676	9	0.0158155		0.874438	9	0.00261868		0.957535	9	0.00621676		-0.165205	9	1.94227		-0.585919	9	8.15775		0.319997	9	0.510308
WBGene00010873		0.486432	7	0.154949		0.000821969	7	1.03047		-0.392078	7	3.83244		0.0112319	7	0.687125		1.15264	7	0.0037654		0.694363	7	0.135297
WBGene00010871		0.605395	15	0.0248092		-0.304139	15	34.4877		0.0558248	15	0.639834		0.15212	15	0.276822		0.405781	15	0.020592		1.22499	15	0.00158571
WBGene00010872		0.0777301	11	1.22227		-1.62874	11	622640		-0.284096	11	4.53395		0.305393	11	0.117537		0.673177	11	0.00820855		0.569303	11	0.150278
WBGene00001949		-0.0105817	9	1.7953		-1.04511	9	1626.14		-1.58299	9	2369.19		-1.48019	9	2723.84		-2.49055	9	114737		0.476031	9	0.263513
WBGene00000637		0.84134	4	0.064472		0.723358	4	0.0431387		-0.677243	4	4.85176		-0.262097	4	1.4672		-0.985028	4	5.33797		0.694282	4	0.19932
WBGene00007252		0.389073	9	0.208437		0.118025	9	0.502221		-0.385533	9	5.54651		-0.181989	9	2.13047		-0.0776886	9	0.637801		-0.51524	9	17.5505
WBGene00007253		-0.0308004	4	1.2888		0.264966	4	0.294879		-0.570503	4	3.54281		-0.762904	4	7.07882		-0.368199	4	1.03052		0.227921	4	0.611625
WBGene00007254		-0.415353	5	6.12709		-0.208271	5	2.52518		-0.691621	5	7.02621		-0.251791	5	1.66358		-0.860426	5	5.86611		-0.0853088	5	1.51883
WBGene00003622		0.460359	24	0.0299127		-0.984491	24	7.54763e+06		-0.103259	24	4.37382		-0.000407267	24	1.40502		-0.787433	24	8056.7		-0.778205	24	25183
WBGene00007255		-0.107887	5	1.89013		-0.076027	5	1.34837		-0.141732	5	1.10242		-0.595766	5	5.77065		1.18654	5	0.00955716		0.403309	5	0.392286
WBGene00007256		1.00847	12	0.00285328		-0.0331839	12	1.75393		0.996469	12	0.001607		0.785541	12	0.00379234		0.283898	12	0.0746013		0.658352	12	0.0859853
WBGene00007257		-0.377371	7	8.28471		-0.535766	7	23.7434		0.643617	7	0.0487936		-0.332134	7	3.29231		0.88887	7	0.0110327		2.44475	7	0.000293969
WBGene00007258		0.973806	21	0.000231325		0.264081	21	0.0566691		0.00954697	21	1.09966		0.255622	21	0.0711776		1.1706	21	2.17723e-06		1.82565	21	1.2757e-06
WBGene00011062		0.358203	3	0.361188		-0.687243	3	10.4286		-1.50307	3	28.2516		-1.37507	3	24.3088		0	3	0.377486		-0.147905	3	1.26171
WBGene00011061		0.434862	18	0.0699806		0.985568	18	1.40707e-05		-0.110497	18	2.89693		-0.0439674	18	1.70238		1.0529	18	3.14294e-05		0.616361	18	0.0588583
WBGene00000963		0.318914	17	0.206273		0.00333434	17	1.61622		-0.964151	17	3586.24		-1.54075	17	1.77761e+06		0.238654	17	0.0637375		0.213453	17	1.16788
WBGene00011063		0.642654	6	0.0898825		-0.0614871	6	1.36631		0.799723	6	0.0341945		0.668369	6	0.0452259		-0.447362	6	2.02657		0.327232	6	0.486952
WBGene00011065		0.471182	4	0.229863		-0.700516	4	16.8999		-0.40267	4	2.16093		-0.255246	4	1.43595		-0.185977	4	0.633921		0.176754	4	0.691687
WBGene00011064		1.18282	12	0.000909133		0.811808	12	0.00122202		0.294213	12	0.136562		-0.084509	12	1.57702		0.693467	12	0.0053717		0.459851	12	0.247919
WBGene00003041		-0.614881	9	46.5748		-0.804818	9	306.185		-0.428565	9	6.89529		-1.53704	9	3725.79		-1.90842	9	6192.72		-0.887975	9	85.1044
WBGene00000275		1.39734	20	5.18648e-06		0.657742	20	0.000372387		0.380883	20	0.0289864		0.0996822	20	0.411202		-0.555866	20	158.756		1.88161	20	1.3833e-06
WBGene00011066		0.859789	14	0.00450005		0.0153838	14	1.25072		-0.243735	14	5.41651		-0.538218	14	65.8565		-0.247206	14	2.98414		-0.33713	14	28.6307
WBGene00002348		1.91033	50	6.65849e-17		1.23044	50	1.34364e-15		0.943243	50	2.31462e-09		0.984102	50	8.50523e-11		1.45434	50	5.07975e-16		1.85307	50	1.07547e-13
WBGene00006656		0.723272	18	0.00536639		0.36169	18	0.0237233		0.183919	18	0.213271		0.160292	18	0.231291		0.269827	18	0.043688		1.3778	18	0.00019006
WBGene00009001		0.460542	16	0.0685349		-0.470441	16	258.222		-0.450111	16	37.382		0.130172	16	0.324991		-0.217664	16	3.08087		0.507488	16	0.150878
WBGene00077548		1.48735	5	0.00423147		0.581501	5	0.0595652		-0.160663	5	1.175		-0.873632	5	15.7612		-0.772027	5	4.44578		-0.167779	5	1.9087
WBGene00009002		1.3706	4	0.0104707		-0.155583	4	1.71992		-0.542885	4	3.266		-0.688703	4	5.60655		-0.62982	4	2.07028		0.120881	4	0.79113
WBGene00004324		1.4721	9	0.000609213		0.307178	9	0.134909		0.529728	9	0.0541219		-0.22471	9	2.69593		-0.290511	9	1.85437		0.617844	9	0.144521
WBGene00009004		-0.0746972	5	1.66478		0.193361	5	0.375615		-0.753895	5	8.66592		-0.119866	5	1.03244		0.012508	5	0.379658		-0.673937	5	7.75798
WBGene00009005		-0.886242	6	56.6107		-0.89085	6	110.395		-2.97751	6	56545.1		-2.57902	6	26485.4		1.28664	6	0.00390223		-0.385463	6	4.55388
WBGene00008762		1.54999	7	0.00115474		-0.152264	7	2.52205		0.122125	7	0.439124		0.800437	7	0.0187513		-0.189302	7	0.893341		0.339158	7	0.469557
WBGene00005131		1.07734	7	0.0101867		-0.124762	7	2.14743		-0.797272	7	21.13		0.292773	7	0.190148		-1.65059	7	344.718		1.59872	7	0.00569406
WBGene00008770		0.213868	3	0.560428		-0.202127	3	1.78198		-1.72313	3	49.2241		-1.28318	3	19.0222		-0.617536	3	1.46581		0.406266	3	0.407849
WBGene00008763		-0.277477	11	10.9363		-0.166042	11	4.78242		-0.821342	11	108.111		-1.20649	11	2042.37		-0.0235704	11	0.519953		0.556273	11	0.160329
WBGene00008764		0.268893	3	0.474008		-0.336613	3	2.90819		-0.0738875	3	0.767288		-2.04547	3	145.481		2.3725	3	0.0020576		-0.515783	3	2.67019
WBGene00008765		0.343458	9	0.266509		-0.7741	9	247.331		-1.36008	9	767.182		-1.27531	9	880.806		0.443207	9	0.0467968		-0.929926	9	101.654
WBGene00008766		0.958903	5	0.0319406		-1.18109	5	255.126		-0.244306	5	1.55737		0.32761	5	0.204714		0	5	0.394847		1.46456	5	0.020735
WBGene00008767		0.0773425	5	0.930658		-0.489853	5	9.60471		-0.82396	5	10.9725		0.380613	5	0.16901		-1.16997	5	15.4868		0.239098	5	0.618277
WBGene00303055		1.11981	1	0.0732797		-0.897992	1	7.58063		-1.30593	1	5.30528		-0.55045	1	1.47872		0	1	0.360888		0.491332	1	0.382589
WBGene00008769		-0.00497532	5	1.27508		-1.18457	5	259.371		-0.118547	5	1.0196		-0.306254	5	2.02569		-0.208902	5	0.760254		1.49285	5	0.0191717
WBGene00001136		0.263813	9	0.409331		-0.219936	9	5.25827		-0.609186	9	17.1926		-0.386601	9	6.57852		-0.161712	9	0.972036		1.0072	9	0.0277773
WBGene00003236		1.73471	4	0.00299844		-0.221561	4	2.26809		-1.33331	4	33.5122		0.206692	4	0.336291		1.96501	4	0.00204687		0.266482	4	0.557472
WBGene00008768		0.487604	4	0.217258		-0.09907	4	1.35703		-0.54453	4	3.28187		-0.222499	4	1.29554		0.75575	4	0.0514599		0.0867992	4	0.858683
WBGene00009915		1.41111	6	0.00352145		-0.120512	6	1.86766		1.38076	6	0.00377918		0.880903	6	0.0189632		-1.25392	6	37.1393		1.84263	6	0.00419839
WBGene00001680		0.35178	8	0.270959		0.0407633	8	0.837223		-0.478846	8	7.00851		-0.839727	8	51.6369		0.798042	8	0.0112313		-0.0624297	8	2.22325
WBGene00009916		0.307	5	0.38662		0.0805474	5	0.641492		-0.529665	5	4.07206		0.0220585	5	0.618		-1.18793	5	16.3841		0.708085	5	0.168615
WBGene00009917		0.287544	22	0.224703		0.0182404	22	1.65216		-0.722843	22	2576.78		-0.373753	22	101.277		-0.311605	22	18.5073		0.272083	22	0.872023
WBGene00009918		0.519776	6	0.150886		-0.607374	6	24.6038		-0.705037	6	10.2621		-0.741322	6	14.4247		0.417051	6	0.089762		0.400246	6	0.387275
WBGene00009919		-0.444175	9	18.5657		-0.538556	9	48.1304		-1.17289	9	297.643		-0.410708	9	7.51308		-0.604838	9	8.96966		-0.97139	9	121.17
WBGene00002136		0.35016	10	0.241902		0.908823	10	0.00131144		-0.45383	10	9.83668		-0.0362255	10	1.0091		-0.615301	10	12.9072		1.15903	10	0.0108246
WBGene00008541		1.49943	12	0.00011393		1.507	12	3.08901e-06		0.849447	12	0.00407314		0.702201	12	0.00675723		-0.0252052	12	0.543371		1.73053	12	0.000282094
WBGene00008542		0.725683	7	0.0514697		0.151969	7	0.425834		-0.842183	7	25.5315		-0.488636	7	6.7243		-0.460173	7	2.69433		1.15238	7	0.0271942
WBGene00008543		0.187289	3	0.607649		0.173132	3	0.4543		0.381279	3	0.243328		1.06494	3	0.0361096		1.53961	3	0.0128231		0.286088	3	0.521028
WBGene00006306		0.447557	42	0.00583323		0.264046	42	0.00736037		-0.220454	42	169.172		-0.18555	42	141.846		-0.707921	42	1.83916e+06		0.853181	42	0.000110485
WBGene00006754		-0.00990922	32	11.242		-0.148701	32	64.1407		-0.0176238	32	2.32816		-0.0866795	32	7.89901		0.48268	32	0.000350247		0.486563	32	0.0745428
WBGene00007597		0.569694	17	0.0243903		-0.335182	17	75.5726		-1.82791	17	5.24988e+06		-1.57457	17	2.43451e+06		0.0123045	17	0.464218		0.505068	17	0.144486
WBGene00000612		1.14542	4	0.0226899		0.998371	4	0.0136157		-2.40343	4	783.777		-1.76532	4	165.194		-0.00714117	4	0.393491		-0.347868	4	2.44161
WBGene00004944		0.0413983	20	2.62137		-0.0467084	20	3.56325		-0.540383	20	221.632		-0.400779	20	87.8867		-0.0754462	20	1.19258		0.0226391	20	6.51125
WBGene00007598		-0.502771	2	3.77974		-0.0836073	2	1.05303		-0.118557	2	0.7882		-0.254414	2	1.04157		0	2	0.369094		0.162339	2	0.627775
WBGene00000596		0.231376	4	0.523773		-0.495029	4	7.13955		-0.285463	4	1.53002		-0.946701	4	12.6124		0	4	0.386069		0.506582	4	0.31299
WBGene00000638		0.520678	5	0.170735		0.790952	5	0.0220508		-1.64284	5	173.047		-1.45229	5	127.735		0	5	0.394847		1.10684	5	0.0558611
WBGene00007599		-0.20939	7	3.82139		-0.452827	7	14.6199		-0.518143	7	6.51852		-0.2298	7	2.06395		0	7	0.413007		0.136485	7	0.955058
WBGene00006752		0.286237	93	0.0179485		0.0576176	93	3.07064		-0.125097	93	2531.58		-0.215366	93	349141		-0.24432	93	149255		0.314072	93	1.23503
WBGene00004958		0.133145	13	0.911097		-0.0287983	13	1.80096		1.08437	13	0.000604004		1.01914	13	0.000481919		0.64019	13	0.00572704		0.485447	13	0.205204
WBGene00003074		-0.345451	18	72.8604		-0.341573	18	102.953		-1.20241	18	46130.9		-1.24833	18	220029		-0.697805	18	334.299		-0.198255	18	27.2065
WBGene00013994		0.571194	23	0.00996097		-0.376342	23	559.507		-0.204372	23	12.2543		-0.121355	23	5.86755		-0.252191	23	11.0053		0.0571868	23	6.6923
WBGene00012136		-0.768816	15	1021.47		0.0785763	15	0.680757		-0.154935	15	3.1704		-0.198048	15	5.15582		-1.0532	15	1891.48		0.0492269	15	3.05748
WBGene00012137		-0.27594	11	10.8331		-0.214623	11	7.07164		-1.29743	11	1796.7		-1.02561	11	635.129		-2.06703	11	100022		0.413862	11	0.325307
WBGene00012138		1.03879	11	0.0032525		0.47554	11	0.027305		-0.438537	11	11.2833		0.452342	11	0.0455059		-0.807451	11	55.3322		0.919051	11	0.0264387
WBGene00012139		0.0488502	36	6.0671		-0.642353	36	5.17262e+06		-0.333089	36	498.898		-0.34733	36	1280.51		0.0476539	36	0.341103		0.133846	36	8.79565
WBGene00271567		-0.715348	4	13.5269		-1.10857	4	93.5374		-0.0965782	4	0.877121		0.0908803	4	0.483914		-0.149683	4	0.575447		-1.08502	4	14.3664
WBGene00012140		1.00245	7	0.0143837		-0.37343	7	9.19047		0.484074	7	0.0955637		1.08762	7	0.00505718		-1.11304	7	38.5486		1.19251	7	0.0236281
WBGene00007042		0.295693	31	0.144624		-0.477544	31	29833.9		-0.119464	31	9.61875		-0.347509	31	464.818		-0.482516	31	1165.3		1.00278	31	0.000137752
WBGene00007742		-0.835536	13	765.016		-1.97355	13	9.6982e+07		-1.09785	13	1502.24		-0.544515	13	51.4423		-0.0833154	13	0.839408		0.671344	13	0.0711095
WBGene00007740		-1.54944	3	120.039		-1.31593	3	102.951		-2.73826	3	637.596		-1.8046	3	76.4927		-1.53738	3	11.058		-0.71178	3	3.98112
WBGene00007741		-0.242412	7	4.44921		-0.232042	7	4.02091		-0.196325	7	1.67991		-0.197534	7	1.78138		-0.214184	7	0.988682		0.0684711	7	1.212
WBGene00077553		-0.0361076	3	1.19935		-0.890232	3	21.8423		-1.00012	3	7.94164		-2.08967	3	163.694		-0.148241	3	0.522798		-0.284688	3	1.66731
WBGene00007743		-0.231616	3	2.17458		-0.69335	3	10.6631		-0.387217	3	1.69162		0.033293	3	0.566728		0	3	0.377486		-0.184597	3	1.35966
WBGene00001648		0.297169	13	0.291362		-0.660701	13	585.577		-0.382073	13	11.9929		-0.450998	13	25.7392		-1.18057	13	1617.95		0.120842	13	1.64024
WBGene00003552		-0.264987	14	17.3529		-0.585612	14	426.808		-1.19939	14	5127.74		-1.1447	14	7827.55		-0.281403	14	3.83861		-0.0657073	14	5.5162
WBGene00007739		-0.124622	13	5.46601		-0.02029	13	1.66602		-0.579409	13	45.4232		-0.480711	13	32.0732		-0.532911	13	18.62		-0.142498	13	7.3605
WBGene00000938		-0.409243	20	206.117		-0.440386	20	597.75		-0.55927	20	266.224		-0.78959	20	5675.62		0.257139	20	0.0403566		-0.0454188	20	11.4277
WBGene00012029		-0.00655646	2	1.01332		-0.196163	2	1.49118		-0.0755467	2	0.72011		0.0348646	2	0.551939		-0.099202	2	0.438075		-0.233343	2	1.21632
WBGene00000496		-0.0975562	20	10.07		-0.470717	20	886.986		-1.20573	20	141351		-1.34955	20	2.29561e+06		0.321756	20	0.0209028		-1.06477	20	52106.7
WBGene00012030		-0.326446	5	4.36076		-0.101029	5	1.51818		-1.69504	5	206.306		-1.09956	5	35.6771		0	5	0.394847		-0.16799	5	1.90982
WBGene00012031		-0.05907	13	3.46572		0.822823	13	0.000741229		-0.503467	13	27.2086		0.106872	13	0.413635		0.549413	13	0.0107078		1.20968	13	0.00330417
WBGene00008411		0.103561	15	1.20164		-0.231709	15	16.4079		-0.688621	15	182.437		-0.314159	15	13.597		0.925279	15	0.000351954		1.06409	15	0.00446442
WBGene00008412		-0.182395	14	9.46335		-1.07129	14	47563.9		-0.883456	14	532.124		-0.343726	14	14.2285		-0.177653	14	1.78815		-0.681322	14	231.083
WBGene00008413		-0.218347	11	7.59352		-0.530162	11	89.714		-0.533565	11	19.7728		-0.849502	11	203.699		1.43197	11	8.95646e-05		-0.0457592	11	3.19173
WBGene00008414		-0.490982	3	4.78868		-1.28706	3	92.6771		-1.41172	3	22.4358		-1.64601	3	50.0965		0	3	0.377486		-0.409064	3	2.14828
WBGene00008415		0.258144	3	0.489773		-0.191992	3	1.7174		-1.86224	3	69.9228		-1.8954	3	97.4682		0	3	0.377486		-0.381294	3	2.03009
WBGene00008421		0.13418	7	0.785036		-0.0226422	7	1.18199		-0.780703	7	19.7052		-0.428147	7	5.10238		0	7	0.413007		-0.239894	7	3.56979
WBGene00004178		1.18715	22	1.82893e-05		1.14368	22	2.08655e-07		0.392097	22	0.0200471		0.369941	22	0.0172732		0.458516	22	0.00353163		1.69119	22	2.48407e-06
WBGene00008417		0.261762	6	0.447758		1.62277	6	0.000182824		-0.366931	6	2.84849		0.863616	6	0.0203522		0.669453	6	0.0361269		1.25544	6	0.0264848
WBGene00008420		0.171916	3	0.636757		0.49969	3	0.138298		-0.733421	3	4.05199		0.42759	3	0.19786		-0.417121	3	0.94377		1.82556	3	0.0226139
WBGene00008418		-0.684434	14	377.32		-0.209638	14	11.1065		-0.58154	14	61.0593		-0.315945	14	11.4316		-0.579169	14	34.3848		-0.00483569	14	3.8128
WBGene00008419		0.426368	25	0.0400483		0.0244422	25	1.68048		0.0837261	25	0.51947		0.391952	25	0.00860025		0.383455	25	0.00507151		0.218207	25	1.62229
WBGene00000084		0.172804	21	0.740433		-0.173791	21	21.5065		0.0753451	21	0.564709		-0.38829	21	96.0446		-0.260882	21	9.10737		0.414567	21	0.248484
WBGene00003071		1.03413	100	7.0316e-16		0.20587	100	0.000725807		0.238373	100	0.000637858		-0.0437764	100	223.262		0.295053	100	2.53947e-06		1.49447	100	7.29389e-20
WBGene00009254		0.867655	25	0.000235481		-0.151294	25	26.844		-0.411218	25	180.314		-0.390316	25	240.303		-0.954797	25	97107.1		1.04585	25	0.000381042
WBGene00009140		0.169823	6	0.659738		-0.927783	6	134.243		0.402963	6	0.153865		0.114805	6	0.43507		-0.4918	6	2.37876		-0.448927	6	5.55697
WBGene00009141		-0.128036	7	2.62704		-1.15175	7	870.253		-0.533745	7	6.96142		-0.26144	7	2.38453		-1.54204	7	221.471		-0.0114047	7	1.60334
WBGene00004508		0.360001	29	0.066961		-0.789082	29	4.32295e+06		-0.364982	29	223.184		-0.686248	29	49507.2		-0.311272	29	60.0516		-0.710607	29	89682.2
WBGene00001214		0.455276	26	0.0258364		-0.546182	26	19262.2		-0.831684	26	38224.6		-0.77309	26	53975.6		-1.35316	26	2.75894e+07		0.283408	26	0.858118
WBGene00009142		-0.212669	7	3.87955		-0.210859	7	3.55252		-0.753922	7	17.6026		-0.281997	7	2.61903		0.8099	7	0.0152214		0.425399	7	0.347123
WBGene00009143		1.43099	13	0.000110112		1.85725	13	5.72361e-08		1.23643	13	0.000216475		0.373253	13	0.0575439		-0.130228	13	1.1599		0.298727	13	0.594954
WBGene00009144		0.384333	7	0.247995		0.329005	7	0.151255		-0.000686809	7	0.73673		-0.570518	7	9.77048		-0.49682	7	3.12835		-0.21288	7	3.24746
WBGene00009145		-0.487109	11	39.8597		0.181828	11	0.290575		-0.582765	11	26.4367		-0.261655	11	4.57528		-0.830265	11	63.3825		-1.71751	11	12918
WBGene00011975		-0.088961	11	3.41807		-0.0749778	11	2.29735		-0.386272	11	8.28774		-0.209759	11	3.27248		-1.0972	11	310.621		-0.974286	11	321.754
WBGene00011972		0.352089	14	0.187039		-0.851876	14	5655.59		-1.44874	14	30654.9		-1.4428	14	81949.9		-0.239576	14	2.82112		0.12088	14	1.77823
WBGene00011970		0.353015	27	0.0831042		-0.16016	27	40.5696		-0.167376	27	12.4993		-0.371344	27	287.965		-0.239657	27	16.3344		0.221064	27	1.72217
WBGene00011971		0.807544	13	0.00839058		0.531362	13	0.0106815		0.677635	13	0.00939975		0.541572	13	0.0165471		-0.47574	13	12.5551		1.07214	13	0.00723757
WBGene00011969		0.270902	4	0.457288		-0.294915	4	3.08492		-2.03871	4	267.679		-0.651916	4	4.9945		0.501413	4	0.101392		0.164814	4	0.71183
WBGene00001595		0.78662	12	0.0122293		0.482803	12	0.0207138		0.630724	12	0.0162491		0.29127	12	0.116603		-0.173077	12	1.40487		1.02521	12	0.0121478
WBGene00011973		0.32937	2	0.41563		-0.111241	2	1.14692		1.47385	2	0.0277909		1.06626	2	0.057353		-0.420842	2	0.763503		1.00691	2	0.153
WBGene00001647		1.14196	6	0.0109525		-0.787423	6	63.8387		-1.28727	6	93.2757		-2.08448	6	3504.77		-1.69326	6	181.062		-0.445375	6	5.4954
WBGene00077728		1.39805	2	0.0244016		-0.60993	2	5.35742		-0.192702	2	0.92104		0.444606	2	0.224514		-2.12593	2	14.5145		-0.270667	2	1.29462
WBGene00011968		0.448859	5	0.224712		-1.26863	5	386.476		0.2547	5	0.290034		-0.337249	5	2.26594		-1.37872	5	29.804		0.0560197	5	1.02675
WBGene00009187		0.00889031	10	1.73817		-0.22293	10	6.37121		-0.483647	10	11.583		-0.373609	10	7.59818		-0.423155	10	4.49947		0.167962	10	1.0356
WBGene00009188		-0.595262	11	77.6791		-1.19152	11	18425.7		-2.09237	11	196125		-1.87097	11	149147		-0.781443	11	47.3941		-0.516238	11	33.051
WBGene00303056		0.0254615	1	0.871265		-1.31271	1	21.7336		-0.400351	1	1.16074		-0.0900634	1	0.669332		-1.0095	1	1.28436		1.44971	1	0.109514
WBGene00009191		-0.33811	3	3.00708		-1.13496	3	53.2596		-0.00662837	3	0.647525		-0.149238	3	0.922445		-0.0235491	3	0.397529		0.389326	3	0.422174
WBGene00009189		-0.0230453	8	1.76345		-0.920335	8	392.034		-1.12488	8	140.052		-1.35598	8	695.379		-0.449476	8	3.25809		-0.0536339	8	2.14886
WBGene00006518		1.20688	10	0.00171243		0.17445	10	0.323467		1.20946	10	0.0010807		1.45788	10	0.000132164		0.737752	10	0.00772684		0.454599	10	0.276892
WBGene00077543		0.131633	3	0.719816		-0.558217	3	6.5184		-0.584996	3	2.78629		-0.168366	3	0.97076		0.274788	3	0.206411		0.0950188	3	0.769065
WBGene00009190		0.483012	25	0.0207138		-0.447127	25	2848.83		-0.824329	25	23793.6		-1.06645	25	1.67393e+06		0.27221	25	0.0204398		0.168888	25	2.66924
WBGene00010291		-0.449656	4	5.43143		-1.16103	4	116.556		-1.12557	4	18.1734		-0.594927	4	4.17558		-1.48245	4	20.11		-0.311934	4	2.23953
WBGene00003818		0.578986	16	0.0261864		0.0615088	16	0.82276		-0.372216	16	20.021		-0.286379	16	12.8355		0.415001	16	0.0161231		0.00934197	16	4.46398
WBGene00000079		0.464996	17	0.0594738		0.392699	17	0.0194002		-0.406879	17	32.5338		-0.606841	17	300.824		0.968693	17	0.000105476		0.289458	17	0.677417
WBGene00012151		-0.219162	21	38.4384		0.385489	21	0.0109197		0	21	1.21131		-0.361029	21	70.7876		0.158023	21	0.105124		0.386067	21	0.317784
WBGene00008397		0.300921	3	0.429981		0.675912	3	0.0727914		-0.895968	3	6.1064		-1.12608	3	12.5075		-0.490863	3	1.10974		0.722445	3	0.214127
WBGene00008401		0.135191	21	1.08164		0.327166	21	0.0240853		0.22328	21	0.126207		0.360751	21	0.0219433		-0.259552	21	8.97927		0.136101	21	2.74882
WBGene00003746		-0.310543	10	11.0088		0.36555	10	0.0771541		-0.99985	10	196.13		-0.883767	10	160.874		-0.112234	10	0.817673		1.1308	10	0.0123263
WBGene00008398		0.0784543	4	0.885582		-0.597707	4	10.9814		-2.33386	4	638.559		-1.88573	4	241.17		0	4	0.386069		0	4	1.05794
WBGene00008399		0.550735	15	0.0378584		-0.112265	15	4.8198		-1.41735	15	46166.1		-1.61578	15	715418		-0.423759	15	13.6647		0.132899	15	1.78476
WBGene00086551		0.218604	4	0.547259		-0.151041	4	1.68747		-1.80608	4	134.901		-1.56999	4	89.418		-0.20553	4	0.667851		-0.607089	4	4.55337
WBGene00008400		-0.0207022	19	4.39754		0.285829	19	0.0524944		-1.10921	19	33447.2		-0.483955	19	163.976		0.0387128	19	0.371406		0.455715	19	0.189339
WBGene00009271		-0.0498791	22	7.68172		-0.107715	22	9.77519		-0.193226	22	9.64262		-0.182205	22	10.8387		-0.194284	22	5.02029		0.599855	22	0.045678
WBGene00009270		-0.0189702	13	2.62269		-0.103637	13	3.57288		-0.752801	13	146.371		-1.76347	13	427765		-0.582019	13	26.1216		0.516703	13	0.171712
WBGene00009272		0.35237	6	0.305598		0.516243	6	0.0641008		-0.875436	6	19.5778		-0.942007	6	32.7747		-0.31208	6	1.24426		0.123557	6	0.922463
WBGene00009276		0.188288	10	0.616417		0.174572	10	0.323172		-0.462237	10	10.3005		-1.12235	10	670.65		-0.127934	10	0.891197		-0.536257	10	26.4646
WBGene00009277		-0.108457	23	15.965		-0.181539	23	32.1429		-0.329074	23	48.1501		-0.559228	23	1194.33		-0.0785267	23	1.47046		0.184443	23	2.03263
WBGene00009274		-0.569484	5	11.0483		0.221729	5	0.328316		-1.62094	5	160.739		-1.11835	5	38.1857		-0.0105158	5	0.408086		-0.382027	5	3.45558
WBGene00006386		-0.00406805	14	2.55552		0.0553913	14	0.848278		-0.240385	14	5.28795		-0.0791127	14	1.7693		-0.198579	14	2.08604		0.547853	14	0.133329
WBGene00000163		1.34416	17	3.3398e-05		0.333894	17	0.037834		-0.365962	17	23.0346		-0.911195	17	5098.34		0.072975	17	0.272637		0.927113	17	0.00701984
WBGene00011230		0.224314	10	0.500568		-0.192919	10	5.08706		-0.215448	10	2.66334		0.363576	10	0.0922462		1.74331	10	3.11073e-05		0.52949	10	0.196169
WBGene00011231		0.00527651	6	1.32019		-0.262097	6	3.95295		-0.418792	6	3.46731		-0.674837	6	10.9907		0.220094	6	0.182611		-0.272195	6	3.19211
WBGene00011232		-0.525795	23	1482.89		-1.0498	23	1.08924e+07		-0.941103	23	39758.2		-0.85106	23	41284.8		-0.40327	23	63.3966		0.742618	23	0.010917
WBGene00011234		-2.22955	2	368.964		-1.48293	2	79.5861		-2.16223	2	57.6843		-1.57171	2	18.7758		-0.0372099	2	0.393593		0.160906	2	0.62928
WBGene00011235		0.238499	16	0.416112		0.378911	16	0.0266403		-0.808521	16	661.304		-0.600513	16	205.313		-0.103656	16	1.19561		0.710474	16	0.037947
WBGene00010110		0.0952746	6	0.903361		0.812466	6	0.0133537		-0.999784	6	31.3673		-1.58135	6	447.776		-1.25382	6	37.1256		1.93803	6	0.00311255
WBGene00010111		0.348565	19	0.142094		-0.170926	19	15.5561		-0.332923	19	24.8035		-0.118775	19	3.88876		0.295067	19	0.0308059		0.546582	19	0.0923696
WBGene00006790		0.810656	14	0.00645464		0.805924	14	0.000582371		-0.280343	14	7.04254		-0.873074	14	921.058		-0.471211	14	15.529		0.43975	14	0.256906
WBGene00010114		1.64153	5	0.00234616		-0.119348	5	1.65603		-0.707816	5	7.42011		-1.87997	5	599.713		-0.364331	5	1.23782		1.73467	5	0.00981078
WBGene00010113		0.17703	23	0.719395		0.169209	23	0.187557		-0.438357	23	159.742		0.118361	23	0.319569		0.34996	23	0.010248		0.242645	23	1.1786
WBGene00008991		0.62652	9	0.0579921		-0.24856	9	6.41546		-0.583269	9	15.0802		0.0193856	9	0.702374		-0.346815	9	2.45936		-0.49467	9	16.0861
WBGene00008990		0.220616	37	0.388801		0.0223068	37	2.67778		-1.09471	37	2.29636e+08		-0.633034	37	334701		-0.624372	37	68340.7		0.548682	37	0.0232502
WBGene00003777		0.77534	42	1.45718e-05		0.792852	42	1.24126e-08		0.87277	42	1.60927e-07		0.758432	42	3.06128e-07		1.33737	42	1.10412e-12		1.09059	42	2.2919e-06
WBGene00011912		0.279905	7	0.401196		-0.995846	7	349.769		-0.32248	7	2.85841		-0.901253	7	44.1926		-1.11177	7	38.3489		-0.555817	7	10.7964
WBGene00011913		0.436284	5	0.235786		-1.12789	5	198.216		0.475573	5	0.137834		-1.66155	5	272.235		-0.708371	5	3.64123		0.103307	5	0.900672
WBGene00011914		0.950863	11	0.00559496		-0.653552	11	242.279		0.599337	11	0.0246334		-0.492387	11	20.2996		0.0452315	11	0.345184		0.439564	11	0.28631
WBGene00011915		0.178635	2	0.619978		-2.34922	2	1158.02		-3.31645	2	651.678		-1.6712	2	23.3589		1.04069	2	0.061166		-0.917071	2	3.81414
WBGene00011916		0.0793718	5	0.923462		-0.814507	5	44.815		-1.02882	5	21.8761		-0.456451	5	3.48693		0.447338	5	0.0970832		-0.426686	5	3.91071
WBGene00011917		-0.27991	10	9.22285		-0.102013	10	2.57252		-0.785068	10	60.4361		-0.844619	10	127.277		-0.478978	10	6.11119		0.758218	10	0.0684682
WBGene00002179		-0.163453	22	25.2198		-0.70002	22	41763.9		-0.188824	22	9.20497		-0.0134051	22	1.51254		0.548896	22	0.00129264		0.587008	22	0.0512752
WBGene00011918		-0.00845214	13	2.43779		0.472786	13	0.0182597		-0.961626	13	599.079		-1.72075	13	311749		0.821925	13	0.00163625		1.34929	13	0.00149075
WBGene00011919		0.184636	8	0.624664		-0.956439	8	493.903		-0.439099	8	5.82914		-0.339881	8	4.16475		1.19201	8	0.00187396		-1.31706	8	285.322
WBGene00011921		0.318598	4	0.388196		0.672716	4	0.0533446		0.851749	4	0.0536875		-0.758966	4	6.99175		0.879005	4	0.0370453		-0.568498	4	4.14992
WBGene00004318		0.192412	39	0.617275		-0.184787	39	372.571		-0.305868	39	522.721		-0.523066	39	75342		-0.0488074	39	2.15463		0.585003	39	0.0114948
WBGene00011920		-0.211287	6	3.28956		-1.27296	6	835.109		-0.507568	6	4.85449		-0.555423	6	6.7443		-1.10449	6	21.6685		1.47075	6	0.0134798
WBGene00010366		0.821066	18	0.00224651		-0.148217	18	10.2932		-0.51134	18	101.045		-0.135634	18	4.16966		-0.200054	18	3.35984		1.07049	18	0.00192404
WBGene00271605		0.410753	15	0.111744		-0.148848	15	7.01416		-0.546994	15	62.2379		-0.301947	15	12.2786		-0.40073	15	11.4093		0.721079	15	0.0405668
WBGene00010367		0.440121	25	0.0341246		0.213617	25	0.085112		-0.269132	25	33.6297		-0.481846	25	796.155		-0.514196	25	388.787		0.593929	25	0.0365274
WBGene00008315		0.0515903	2	0.868464		0.0390758	2	0.720701		-0.20978	2	0.954681		-0.677783	2	2.63833		0.17727	2	0.271748		0.333081	2	0.471905
WBGene00008314		0.203044	23	0.542372		-0.394128	23	726.26		-0.421604	23	132.917		-0.458213	23	350.367		-0.308107	23	21.0407		0.670619	23	0.0214241
WBGene00008313		-0.705866	10	108.106		0.151513	10	0.38419		0.280868	10	0.175406		-0.107032	10	1.5415		-2.3334	10	159647		0.451931	10	0.280313
WBGene00008312		0.591641	14	0.0322228		0.322601	14	0.0634314		-0.0235716	14	1.11702		0.74574	14	0.00266455		-0.293435	14	4.19421		1.19175	14	0.00268085
WBGene00008311		0.165105	7	0.680801		0.0976576	7	0.584991		-0.375124	7	3.56824		-0.556168	7	9.15119		-0.205001	7	0.952363		0.288668	7	0.560404
WBGene00008317		-0.361946	17	67.8945		-0.0123583	17	1.93157		-1.59425	17	730885		-1.26937	17	142527		-1.17669	17	15720.6		-0.145842	17	15.3323
WBGene00008316		0.212231	4	0.559369		0.0943563	4	0.603034		-2.04278	4	270.907		-1.97607	4	320.34		-1.04471	4	6.25878		-0.0439479	4	1.17584
WBGene00000869		-0.0804374	6	1.89482		-0.692299	6	38.5757		-0.175644	6	1.37943		-0.0439958	6	0.832917		0.569737	6	0.051759		0.919862	6	0.0758844
WBGene00008318		0.394433	3	0.323476		-0.352537	3	3.08184		-2.19832	3	163.262		-2.34161	3	320.662		-0.00798184	3	0.384163		-0.160592	3	1.29475
WBGene00010560		-0.219213	7	3.99827		-0.812296	7	119.594		-2.05943	7	4309.1		-1.48022	7	620.463		-0.711982	7	7.51876		0.11259	7	1.03844
WBGene00045192		-0.0123889	5	1.31175		0.138087	5	0.488239		-1.16173	5	34.2293		-1.3056	5	75.1532		0.32931	5	0.140572		-0.539025	5	5.33852
WBGene00010562		0.774038	11	0.0166556		0.807636	11	0.00188368		-0.453702	11	12.34		-1.00301	11	548.885		-0.262451	11	2.15615		1.01119	11	0.0167277
WBGene00010563		-0.1756	6	2.83009		0.685347	6	0.026179		-0.884733	6	20.2801		-1.76323	6	942.098		0.289504	6	0.142177		1.3564	6	0.0192958
WBGene00010564		0.505037	7	0.142222		0.557258	7	0.0398224		-0.651737	7	11.4445		-1.39865	7	427.622		0.262704	7	0.141572		0.0459823	7	1.31135
WBGene00010569		-0.867033	3	15.0416		-0.458782	3	4.53797		-1.78435	3	57.447		-1.48802	3	32.861		0	3	0.377486		-0.382248	3	2.03404
WBGene00010565		0.790004	12	0.0119608		-0.0843476	12	2.72372		-0.244054	12	4.11261		0.369146	12	0.0679666		-0.569877	12	17.974		0.517929	12	0.181868
WBGene00077768		-0.147416	3	1.68298		-1.64862	3	345.826		-0.948045	3	6.96387		-0.615955	3	3.20552		-2.96297	3	253.397		-1.7685	3	34.2956
WBGene00010566		-0.44001	8	14.167		0.473291	8	0.0526054		-0.972981	8	69.2579		-0.958354	8	93.8526		-0.803472	8	16.283		-0.84242	8	45.4705
WBGene00000156		-0.0687324	26	14.1227		-0.461539	26	4839.7		-0.232622	26	24.9762		-0.0811186	26	4.53796		-0.421283	26	151.295		-0.10808	26	51.5781
WBGene00010567		-0.881876	6	55.5783		0.051623	6	0.750611		-0.469294	6	4.19889		-0.482866	6	5.01267		1.87775	6	0.000463064		-0.821021	6	17.854
WBGene00010568		-0.901481	6	60.3672		-2.17832	6	100907		-0.61767	6	7.36894		-0.85326	6	22.7991		-0.39533	6	1.67988		-0.383478	6	4.5256
WBGene00008935		-0.0300291	6	1.53206		-1.48871	6	2617.71		-0.352898	6	2.70092		0.184031	6	0.3278		-1.14418	6	25.0024		-0.212295	6	2.64531
WBGene00000485		0.674893	76	1.55001e-07		0.273769	76	0.000176232		-0.644962	76	1.91862e+10		-0.322503	76	1.7241e+06		0.231136	76	0.000424142		0.48825	76	0.00690671
WBGene00004378		0.187596	39	0.670288		0.160366	39	0.11246		-0.974963	39	7.43978e+07		-0.896803	39	1.19511e+08		-0.125656	39	9.35394		1.09843	39	4.63073e-06
WBGene00008934		-0.0247262	5	1.37514		-0.363098	5	5.26391		-1.19555	5	38.3589		-0.725128	5	9.21247		0.149656	5	0.246942		0.359926	5	0.442387
WBGene00005009		0.0543412	18	2.0724		0.0702878	18	0.762754		-0.0768328	18	2.14975		-0.103128	18	3.03489		0.829787	18	0.00024709		0.702546	18	0.0307518
WBGene00002999		-0.355901	23	234.414		-0.616248	23	18871.1		-1.6218	23	6.97466e+07		-1.66247	23	7.83272e+08		0.0234102	23	0.451177		-0.137709	23	41.5114
WBGene00003136		-0.174592	12	6.69672		-0.80973	12	1397.1		-0.956869	12	373.628		-0.701954	12	113.869		-1.17072	12	852.919		0.231538	12	0.838046
WBGene00012113		-2.12758	9	161342		-1.63432	9	97582.4		-0.635977	9	19.6877		-1.23711	9	713.613		-0.890154	9	37.5121		-0.715798	9	41.0416
WBGene00012116		-0.536351	9	30.5068		0.155252	9	0.387744		-1.49558	9	1522.54		-1.82126	9	17839.5		-0.657872	9	11.7025		0.898197	9	0.0440766
WBGene00002101		0.0758891	4	0.893418		0.0303549	4	0.788669		-0.23127	4	1.30428		-0.13513	4	0.984494		-0.217359	4	0.68925		0.0367994	4	0.968364
WBGene00044122		0.371389	5	0.302218		-0.694677	5	25.3815		-0.644391	5	5.99285		-1.48867	5	145.699		-0.843056	5	5.5551		0.359333	5	0.443114
WBGene00012114		0.546441	37	0.0019024		-0.278833	37	2264.29		-0.34704	37	753.317		0.0110652	37	1.87964		-0.872472	37	6.19424e+06		0.767796	37	0.000971253
WBGene00012115		1.01252	37	9.42614e-07		0.554683	37	1.79032e-05		-0.443215	37	3823.06		-0.198942	37	96.8314		0.0132904	37	0.636841		1.47995	37	3.19958e-08
WBGene00023413		0.0226238	1	0.876876		0.0925559	1	0.612544		-0.10182	1	0.703346		-0.141751	1	0.731627		0	1	0.360888		0.0376794	1	0.691656
WBGene00008570		0.0249688	82	187.324		-0.191714	82	329151		-0.776426	82	1.36784e+13		-0.53353	82	2.56371e+10		0.0776885	82	0.105263		0.165694	82	109.379
WBGene00023411		-0.0514298	3	1.25661		-0.0243843	3	0.932741		-0.946421	3	6.9354		-0.933001	3	7.47096		0	3	0.377486		0.603267	3	0.272991
WBGene00011379		-0.210117	4	2.38582		-0.345515	4	3.81409		-0.0352452	4	0.732144		-1.02243	4	16.0008		0.772899	4	0.0491598		1.2691	4	0.0500464
WBGene00011378		0.779557	10	0.0202313		-0.243019	10	7.40727		-0.339709	10	5.26268		-1.90512	10	72566.6		-1.01167	10	113.483		1.2164	10	0.00831286
WBGene00000967		0.777864	29	0.000269143		0.23699	29	0.0423601		0.441615	29	0.00413507		0.286792	29	0.0231		0.693073	29	3.1184e-05		0.338362	29	0.484799
WBGene00011376		1.17462	23	1.4219e-05		0.29874	23	0.0280633		0.482736	23	0.00651093		0.544207	23	0.00181682		1.31381	23	1.44232e-07		0.598366	23	0.0421444
WBGene00011375		0.640213	12	0.031953		0.232636	12	0.178194		-0.583837	12	35.2862		-0.560682	12	42.7724		-0.514316	12	12.5788		1.72248	12	0.00029447
WBGene00004966		-0.135433	5	2.10016		0.045242	5	0.758468		-0.715806	5	7.62251		-1.30207	5	74.2003		0	5	0.394847		0	5	1.19913
WBGene00013955		0.00706004	25	5.27365		-0.0763879	25	8.23954		-0.707898	25	6009.54		-0.672523	25	9655.28		0.0554452	25	0.309034		-0.0972678	25	39.2156
WBGene00011380		0.124124	3	0.736455		0.0114872	3	0.818506		-0.737439	3	4.09328		-0.682405	3	3.82753		-0.529858	3	1.209		-0.257387	3	1.57708
WBGene00013956		0.357142	5	0.319145		0.196178	5	0.370628		-0.86244	5	12.4909		-0.733617	5	9.49964		0	5	0.394847		0.578178	5	0.241658
WBGene00000639		0.632176	6	0.0939421		0.35448	6	0.150971		-0.0109326	6	0.738814		0.296911	6	0.206598		0	6	0.403825		1.22569	6	0.0290757
WBGene00000433		-0.010341	4	1.20135		0.0585316	4	0.700781		-0.0604423	4	0.788554		-0.0577577	4	0.772006		0	4	0.386069		0	4	1.05794
WBGene00044094		-0.484209	7	13.5523		-1.35796	7	2905.81		-0.681282	7	12.9616		-1.1996	7	172.427		-1.08271	7	34.0664		0.54481	7	0.228463
WBGene00013958		-0.591725	4	8.84734		1.03624	4	0.0116164		-0.208015	4	1.21792		-0.86422	4	9.73264		-0.44021	4	1.24868		0.0884031	4	0.855379
WBGene00013957		0.0973871	4	0.829832		0.0349713	4	0.773549		-0.270291	4	1.46315		-0.297727	4	1.64103		-0.214944	4	0.684826		0.000968643	4	1.05548
WBGene00013959		0.12758	11	0.89868		-0.0394372	11	1.72565		-0.348093	11	6.61535		-0.473532	11	17.9725		0	11	0.45187		0.0968738	11	1.57132
WBGene00013960		0.371109	22	0.0937003		-0.0587497	22	4.89759		-1.06264	22	92927.1		-1.39461	22	1.50646e+07		-0.363758	22	33.0537		0.00117488	22	9.98032
WBGene00011344		-0.235681	40	1107.6		-0.371151	40	38173.5		-0.5836	40	95484.5		-0.254889	40	446.536		-0.704921	40	852688		-0.15146	40	1019.94
WBGene00011345		0.157976	16	0.800333		0.56678	16	0.0034976		-0.22476	16	6.13964		0.202825	16	0.171163		-0.053896	16	0.790987		0.0716592	16	2.92207
WBGene00002196		-0.573934	12	91.9545		-0.0164545	12	1.51883		-1.71101	12	44086.9		-0.820134	12	258.308		-0.666269	12	33.3859		1.62555	12	0.000493885
WBGene00003788		0.750636	10	0.0239113		-0.918728	10	1176.67		-0.681819	10	34.3189		-0.855363	10	135.728		-1.42129	10	1073.06		-0.393721	10	13.7337
WBGene00003183		0.139404	4	0.718325		-0.111619	4	1.43035		-1.4289	4	44.4106		-0.0276267	4	0.702262		-0.221262	4	0.696462		0.0857145	4	0.860926
WBGene00009920		0.092782	30	2.37256		-0.208751	30	150.336		-0.519077	30	2309.33		-0.512217	30	4836.37		-0.15804	30	7.27254		0.216469	30	2.07772
WBGene00009923		0.00868194	7	1.39944		-0.520292	7	21.6896		-1.50763	7	421.413		-1.53977	7	814.204		-2.00073	7	1436.16		-1.20622	7	105.388
WBGene00009921		0.347308	6	0.31219		0.296498	6	0.205231		-0.658408	6	8.59947		-1.17109	6	83.6392		-0.208149	6	0.85537		-0.128642	6	2.03478
WBGene00009922		0.18153	32	0.717407		-0.0550148	32	10.2001		-0.119231	32	10.4487		-0.8089	32	1.10227e+06		-0.834473	32	391140		0.424224	32	0.164125
WBGene00000467		0.348563	9	0.259279		0.356774	9	0.0955792		0.144507	9	0.379864		0.170474	9	0.305492		0.0168256	9	0.397046		0.0429167	9	1.65019
WBGene00004439		-0.0658294	3	1.31291		0.875309	3	0.0352117		-1.68862	3	45.1198		-1.05983	3	10.4804		0.0224188	3	0.359345		-0.166421	3	1.31022
WBGene00007911		0.480307	8	0.14255		-0.166838	8	3.15993		-0.695241	8	19.1115		-1.11691	8	208.581		-0.369532	8	2.26547		1.05901	8	0.0290038
WBGene00007914		-0.744593	10	135.219		-0.521828	10	59.9552		-0.298914	10	4.20825		-0.22015	10	3.03325		0.387894	10	0.0526412		-0.191966	10	5.42694
WBGene00007912		-0.0982609	17	7.19274		0.0157855	17	1.40307		-0.37982	17	25.8923		-0.411734	17	49.021		-0.354821	17	11.6243		0.763279	17	0.02271
WBGene00007913		0.343716	17	0.167009		0.0969106	17	0.55834		-0.694428	17	368.258		-0.418658	17	52.2813		0.560888	17	0.00377376		0.392596	17	0.323493
WBGene00006531		-0.200314	13	9.25034		0.0462024	13	0.906451		-1.30148	13	5936.38		-1.08909	13	2901.07		-0.395038	13	7.19806		-0.389626	13	30.1139
WBGene00004684		-0.274664	18	38.7931		0.0716188	18	0.750759		-0.979485	18	6398.6		-0.765686	18	1968.38		0.644267	18	0.00137238		0.0372336	18	4.61654
WBGene00008887		0.0105466	25	5.06393		-0.753207	25	355352		-0.531912	25	750.817		-0.851672	25	100696		0.818235	25	2.18413e-05		0.69016	25	0.0138248
WBGene00008889		-0.44226	6	8.71007		-0.198736	6	2.82618		-1.63021	6	342.251		-1.27944	6	130.269		-0.139521	6	0.667855		0.240786	6	0.638631
WBGene00011827		0.148006	49	1.58326		-0.318911	49	81722.6		-0.756019	49	5.34233e+07		-0.78447	49	7.8927e+08		-0.137396	49	27.9444		0.143528	49	19.7375
WBGene00008890		0.349037	12	0.215804		0.324466	12	0.0808753		0.893371	12	0.00308501		0.71987	12	0.00597837		0.482758	12	0.020795		0.864054	12	0.0286981
WBGene00003596		-0.24922	15	18.3831		-0.686176	15	1735.07		-0.769791	15	337.906		-1.14449	15	13968.6		-0.385336	15	10.1133		-0.253631	15	21.4568
WBGene00011828		-0.786877	8	80.1793		-1.07663	8	1065.62		-0.0514543	8	0.966404		-1.05313	8	151.276		0.875289	8	0.00790583		-0.635248	8	20.398
WBGene00011829		0.294851	5	0.40501		-0.0148571	5	1.00872		-0.111696	5	0.996348		-0.183116	5	1.29777		0.225153	5	0.194879		0.427613	5	0.366742
WBGene00008529		-0.236714	11	8.50459		-0.289998	11	12.9742		0.976655	11	0.00265555		0.831828	11	0.0039249		1.44485	11	8.29499e-05		0.674037	11	0.0893122
WBGene00008528		0.250678	2	0.51212		-0.526328	2	4.13744		0.256538	2	0.358461		-0.972809	2	5.04206		0	2	0.369094		-0.000158704	2	0.823699
WBGene00003014		-0.37375	8	10.1737		-0.278878	8	6.47126		-1.358	8	412.702		-1.09315	8	185.055		-0.498093	8	4.06378		0.646411	8	0.143157
WBGene00008531		-0.537244	12	72.2847		-0.515468	12	111.135		-1.88599	12	133361		-1.70932	12	122647		-1.43797	12	4747.85		-0.465632	12	34.5519
WBGene00004117		-0.127749	31	53.922		0.243732	31	0.031595		0.0199415	31	1.30043		-0.0783288	31	6.38474		-0.0755858	31	2.25997		0.210874	31	2.33037
WBGene00004931		-0.0274546	64	232.427		-0.382236	64	2.49433e+07		-0.994864	64	9.47737e+12		-0.456029	64	1.17107e+07		-0.477326	64	3.68988e+06		0.244982	64	4.9491
WBGene00008530		-0.441003	4	5.27239		-0.641737	4	13.2081		-1.33743	4	33.9209		-1.35175	4	45.0384		0	4	0.386069		0.88314	4	0.126579
WBGene00008533		0.272361	7	0.415383		0.181081	7	0.359187		-0.970931	7	43.9196		0.512096	7	0.0698956		-0.216316	7	0.997312		0.158678	7	0.883621
WBGene00008532		0.00860498	24	4.81654		-1.25821	24	4.86083e+08		-2.03019	24	1.50622e+10		-1.054	24	830609		-1.30266	24	4.02393e+06		0.323758	24	0.555134
WBGene00008648		0.255173	11	0.409022		-0.0387689	11	1.71639		-0.0715674	11	1.29299		0.32714	11	0.102138		-0.831275	11	63.7652		0.228127	11	0.818572
WBGene00008649		0.0841281	5	0.906813		-0.471839	5	8.81792		-0.412804	5	2.74707		-0.139284	5	1.10754		-0.0381632	5	0.445049		1.10654	5	0.0559074
WBGene00008650		0.564732	4	0.166701		0.332833	4	0.221846		0.682744	4	0.0883242		-0.138686	4	0.995558		-0.287525	4	0.831061		-0.219238	4	1.79214
WBGene00008651		0.152309	12	0.784393		0.0817199	12	0.652719		0.245973	12	0.185294		-0.851066	12	320.07		-0.848274	12	107.481		0.10031	12	1.6877
WBGene00008652		-0.278104	16	27.6455		-0.34358	16	65.5494		-1.07479	16	5589.44		-0.941336	16	4156.36		0.866264	16	0.000380462		-0.0519107	16	6.77034
WBGene00006844		-0.000177992	6	1.3509		-0.181976	6	2.58615		-0.400221	6	3.23161		-0.418791	6	3.85716		0	6	0.403825		0.00522164	6	1.33708
WBGene00008381		0.582652	21	0.0119111		-0.168691	21	20.0692		-0.906146	21	11728.3		-0.745951	21	5261.47		-0.186967	21	4.1447		0.751326	21	0.013581
WBGene00045508		0.460824	6	0.193457		-0.829505	6	79.7748		-0.185699	6	1.43302		0.318332	6	0.189269		-0.338107	6	1.36668		-0.00792391	6	1.39336
WBGene00050879		0.784589	4	0.078346		1.74367	4	0.000598096		0.204884	4	0.360912		-1.2751	4	35.3981		1.23819	4	0.0142161		1.17741	4	0.0623887
WBGene00086554		0.0180191	3	1.01719		-0.103545	3	1.24443		-0.699006	3	3.71499		-0.32154	3	1.461		0.132412	3	0.282208		0.0942658	3	0.770246
WBGene00008382		0	2	0.995846		-0.0165226	2	0.855831		-0.22828	2	0.992511		-0.0904481	2	0.726715		0	2	0.369094		0	2	0.823481
WBGene00008383		1.12631	6	0.0116993		0.332931	6	0.169221		0.1154	6	0.457673		-0.335325	6	2.74173		0.369673	6	0.106484		1.08953	6	0.0445667
WBGene00008384		0.148158	11	0.791539		-0.397253	11	30.7695		-1.43388	11	4020.6		-1.43378	11	8862.59		0.16234	11	0.171879		0.0029373	11	2.50583
WBGene00008387		0.705278	7	0.0565421		0.534584	7	0.0454678		0.0409068	7	0.618301		-0.191016	7	1.72918		-0.576545	7	4.32938		1.31607	7	0.0153265
WBGene00008385		0.853603	16	0.00281394		-0.662465	16	2057.15		-1.04568	16	4426.08		-0.398643	16	34.5698		-0.0720636	16	0.919766		-0.0387686	16	6.19156
WBGene00008386		-0.229303	17	21.9486		-0.432469	17	228.179		-1.06617	17	8482.16		-0.952325	17	7473.56		-1.92376	17	1.10297e+07		-0.355035	17	68.6537
WBGene00000431		-0.168781	7	3.16943		0.0271969	7	0.883209		-0.549318	7	7.43348		-0.63117	7	12.8859		0.0264347	7	0.370825		0.797935	7	0.0941276
WBGene00010496		0.822912	8	0.0257296		0.518058	8	0.0395041		-0.495952	8	7.58694		0.219932	8	0.248339		-1.07497	8	55.9324		-0.00660725	8	1.79135
WBGene00010495		-0.96393	7	123.516		-0.122378	7	2.1177		-2.03876	7	3949.68		-1.41648	7	463.877		1.19272	7	0.00319802		0.430946	7	0.340443
WBGene00010497		-0.00182823	12	2.15608		-0.700603	12	546.417		-0.635993	12	49.0788		-1.09403	12	1724.24		0.154065	12	0.171775		0.726925	12	0.0596421
WBGene00010498		0.273171	33	0.186365		0.0832931	33	0.677315		-0.47919	33	2707.05		-0.648371	33	111930		-0.847925	33	736980		0.284062	33	0.988718
WBGene00010499		1.07099	4	0.0292985		-0.183202	4	1.93109		-0.205739	4	1.20979		-0.31229	4	1.71787		-2.45242	4	267.108		1.32617	4	0.0436305
WBGene00044679		0.41981	8	0.192868		-0.213696	8	4.26456		-1.35163	8	400.683		-1.16775	8	269.457		-1.67038	8	837.455		-0.730812	8	29.5242
WBGene00010500		0.0534373	4	0.965033		-0.110836	4	1.42566		-0.358071	4	1.89489		-0.11495	4	0.924003		0	4	0.386069		0.00105146	4	1.05527
WBGene00006976		0.837424	6	0.0395435		0.162883	6	0.416424		-1.19061	6	64.659		-0.017775	6	0.748224		-0.405077	6	1.73997		1.0743	6	0.0467474
WBGene00001677		0.24061	7	0.480804		-0.818362	7	123.912		-1.49203	7	394.607		-1.33356	7	317.734		-0.439112	7	2.47272		0.0550917	7	1.27016
WBGene00010855		0.107536	7	0.887548		0.337462	7	0.143958		-0.638162	7	10.8083		-0.875703	7	39.3292		0.0687427	7	0.312093		-0.00448911	7	1.56496
WBGene00010854		-1.91259	5	1881.35		-1.415	5	773.964		-1.81589	5	309.949		-0.329475	5	2.20313		2.89284	5	4.53216e-05		-0.216132	5	2.18231
WBGene00001651		-0.0538003	81	2457.21		-0.200332	81	421757		-0.276962	81	191348		-0.343808	81	1.04436e+07		0.0516148	81	0.293811		0.600714	81	0.00016899
WBGene00011353		-0.0063307	6	1.3864		-0.231181	6	3.35598		-0.747934	6	12.0742		-0.67012	6	10.7807		-0.119778	6	0.621964		-0.624116	6	9.6271
WBGene00011352		0.211153	29	0.477803		-0.751539	29	2.20165e+06		-0.26324	29	56.4621		-0.227169	29	51.0132		-0.153649	29	6.19744		0.422351	29	0.183583
WBGene00000904		0.605971	17	0.0179097		-0.556901	17	937.741		-0.666095	17	289.946		0.0939468	17	0.44486		-0.789756	17	527.646		0.614354	17	0.0660242
WBGene00004305		0.994427	5	0.0278824		0.22183	5	0.328157		-0.716711	5	7.64579		-0.477728	5	3.76579		1.87592	5	0.00109995		1.26448	5	0.0360945
WBGene00011033		0.567888	6	0.123186		0.0548242	6	0.737994		-0.757996	6	12.5436		-0.375286	6	3.22848		1.3097	6	0.0035909		0.508524	6	0.275749
WBGene00011037		0.265259	13	0.363713		-0.0325517	13	1.86391		-1.12838	13	1845.91		-1.03619	13	1960.76		-0.399967	13	7.4468		-0.0994678	13	5.7593
WBGene00011034		0.458287	9	0.143556		-0.995692	9	1153.53		-1.35751	9	757.297		-0.953913	9	149.884		0.583859	9	0.0231146		-0.115349	9	3.22605
WBGene00011032		-0.150819	13	6.55769		-0.254493	13	14.2146		-1.41363	13	12654.1		-1.0256	13	1812.93		-0.313431	13	4.10107		1.60051	13	0.000355963
WBGene00011035		-0.779738	11	242.421		-1.05345	11	6062.11		-0.211329	11	2.95065		-0.943728	11	374.315		-0.08984	11	0.771486		-0.728117	11	94.7022
WBGene00011036		-0.589527	14	187.981		-1.24542	14	257750		0.0311653	14	0.754387		-0.502563	14	49.7288		0.30529	14	0.0510567		0.392826	14	0.34152
WBGene00009673		0	1	0.922923		-0.0249293	1	0.825511		-0.0976649	1	0.698459		-0.0189081	1	0.592156		0	1	0.360888		0	1	0.726523
WBGene00009664		0.66746	5	0.0973841		0.145502	5	0.471363		-0.351517	5	2.2347		-0.766495	5	10.6989		0.527162	5	0.0755825		0.469557	5	0.326508
WBGene00009665		-0.191312	4	2.23661		-0.0928112	4	1.32188		-1.10064	4	16.8866		-1.51393	4	74.9743		-0.0779916	4	0.475317		0.684485	4	0.20407
WBGene00009667		-0.0886897	10	3.05477		-1.22028	10	11295.6		-0.521152	10	14.2264		-1.17784	10	934.781		-1.51435	10	1787.59		1.13736	10	0.0119597
WBGene00009666		0.0403992	10	1.44883		-0.657652	10	166.053		-0.951315	10	150.32		-0.774496	10	83.6601		-0.727919	10	23.9373		0.593686	10	0.145991
WBGene00009668		0.012419	5	1.193		-1.38673	5	676.809		-0.277502	5	1.74161		-2.07262	5	1203.6		-1.64812	5	69.3757		0.4125	5	0.382424
WBGene00219282		-0.128701	2	1.40112		-0.541073	2	4.33036		-0.812239	2	3.38434		-1.94815	2	42.9044		-0.742016	2	1.32961		-0.210945	2	1.17162
WBGene00009670		0.0239686	4	1.06781		0.012849	4	0.84874		0.78472	4	0.0654066		0.130187	4	0.427686		-0.199811	4	0.657742		-0.0532935	4	1.20256
WBGene00001414		1.91377	66	1.33106e-21		1.16765	66	6.27801e-19		1.40073	66	1.13018e-17		1.26767	66	9.07187e-18		1.31141	66	1.22678e-18		1.99144	66	4.74326e-19
WBGene00000468		-0.687523	4	12.2941		-0.932481	4	44.7008		-2.45893	4	922.977		-2.48578	4	1589.43		-1.715	4	37.3874		-2.18514	4	202.301
WBGene00000777		0.463231	8	0.155248		0.566831	8	0.028915		-1.14055	8	150.605		-0.216898	8	2.24168		-0.741132	8	12.2652		-0.314419	8	5.89449
WBGene00009671		0.683823	11	0.0290584		0.17485	11	0.307368		-0.336179	11	6.16607		-0.447277	11	15.1697		1.0151	11	0.00107176		0.550645	11	0.164875
WBGene00009672		-0.0930239	15	5.49427		-0.445865	15	147.549		-1.788	15	770323		-1.55862	15	443859		-1.09863	15	2699.86		-0.267335	15	23.4345
WBGene00012150		0.360578	6	0.295204		-0.744936	6	50.9767		-0.681518	6	9.38678		-0.664676	6	10.5433		0	6	0.403825		0.56876	6	0.228273
WBGene00000890		0.479686	20	0.0375758		-0.457292	20	744.83		-1.11648	20	59436.7		-1.44405	20	6.32128e+06		0.143444	20	0.128421		0.267906	20	0.857598
WBGene00009562		1.38663	5	0.00622022		0.699702	5	0.0339972		1.19798	5	0.0120956		-0.962227	5	21.7129		-0.011623	5	0.409506		0.358699	5	0.443893
WBGene00045237		0.712256	6	0.0670259		0.447504	6	0.0922471		-1.53234	6	236.172		-0.940931	6	32.6308		0.374225	6	0.104751		0.336832	6	0.472507
WBGene00006377		0.154293	3	0.671844		-0.311506	3	2.65405		-2.79831	3	741.913		-2.61876	3	671.883		-0.444428	3	1.00212		0	3	0.933378
WBGene00009563		0.0341588	7	1.24448		-0.111697	7	1.9895		-2.50526	7	28194.9		-0.930209	7	50.4351		0.425909	7	0.0727965		-1.79115	7	817.876
WBGene00010620		0.691515	10	0.0336491		0.686603	10	0.00694368		-1.36597	10	1458.86		-1.6003	10	11710.5		-0.448637	10	5.17435		-0.238195	10	6.71351
WBGene00086557		0.147034	7	0.7399		-0.179224	7	2.95263		0.113099	7	0.456145		0.17416	7	0.326703		-0.015383	7	0.439729		0.520761	7	0.248543
WBGene00010621		0.948702	27	5.08602e-05		0.221565	27	0.0647833		0.189951	27	0.135407		0.655828	27	0.000157977		0.232538	27	0.0282502		1.58012	27	6.98736e-07
WBGene00001990		0.0486725	9	1.30463		-0.445575	9	25.2237		-1.38158	9	855.354		-0.101527	9	1.36748		-0.0537706	9	0.56571		-0.110128	9	3.15549
WBGene00010622		0.238351	7	0.485835		-0.275471	7	5.18323		-0.357424	7	3.3118		-0.581022	7	10.2502		-0.00201039	7	0.416405		-0.0571235	7	1.88183
WBGene00010624		0.236199	4	0.51517		-0.0644262	4	1.17355		-0.607393	4	3.94949		-0.387363	4	2.17493		0.654993	4	0.0673209		0.0160939	4	1.01779
WBGene00000209		1.55819	1	0.0271824		0.813462	1	0.0981711		-3.61473	1	255.462		-1.90113	1	15.1298		0.375789	1	0.22498		0.465687	1	0.395613
WBGene00010623		1.02197	9	0.00688722		-0.409516	9	19.6329		-1.41283	9	1001.82		-0.630178	9	25.1785		-0.459981	9	4.33797		0.584354	9	0.166547
WBGene00003953		-0.0894626	6	1.96831		-0.374566	6	7.17101		0.359246	6	0.181598		-0.0287515	6	0.782576		-1.06736	6	18.9533		-0.614403	6	9.3382
WBGene00009565		0.450069	7	0.183203		-0.0520614	7	1.40384		-1.52878	7	460.701		-0.989236	7	66.0253		-0.223272	7	1.02599		0.710276	7	0.127961
WBGene00006577		0.718398	19	0.00456729		-0.195158	19	21.0395		-1.29699	19	191184		-1.24472	19	398117		0.232837	19	0.0563768		-0.480907	19	309.191
WBGene00000409		0.13574	9	0.816121		-0.158394	9	3.42855		-0.467494	9	8.39599		-0.166057	9	1.95141		-0.159591	9	0.961752		0.615375	9	0.14604
WBGene00000527		0.422742	45	0.00702774		0.062122	45	1.22931		-0.311383	45	1572.8		-0.105208	45	33.8591		0.202445	45	0.0114687		0.241689	45	2.66846
WBGene00003925		1.23906	8	0.00321574		1.3767	8	0.000162495		0.691775	8	0.0308187		0.73165	8	0.0188671		-0.177074	8	0.944618		-0.250786	8	4.60802
WBGene00007971		1.01943	5	0.0253392		-0.525456	5	11.3721		1.39599	5	0.00620829		0.522424	5	0.101207		-1.42982	5	34.9852		0.0801412	5	0.960372
WBGene00044614		-0.680337	4	11.9944		-1.09291	4	87.5921		-2.5977	4	1389.05		-2.19131	4	630.035		-0.104249	4	0.509789		-0.436597	4	3.02218
WBGene00044120		-0.769605	3	11.1818		-0.00201685	3	0.859769		-2.80058	3	746.163		-2.23741	3	242.813		-0.648834	3	1.57014		0.659656	3	0.243356
WBGene00007973		1.10172	8	0.00638777		-0.0246472	8	1.2723		0.280052	8	0.207844		-0.165369	8	1.72925		-1.39594	8	240.56		-0.525687	8	13.3498
WBGene00007972		0.34096	7	0.30284		-0.440298	7	13.5872		-1.69661	7	934.349		-1.63667	7	1266.98		-0.662602	7	6.14815		-0.265658	7	3.90697
WBGene00007974		0.358181	4	0.338853		-0.308342	4	3.26359		-0.90403	4	9.46294		-0.639034	4	4.79636		0.304441	4	0.171438		-0.0383603	4	1.16015
WBGene00007975		0.681138	15	0.0138124		-0.620666	15	886.194		-0.747493	15	285.273		-0.441574	15	39.4084		1.58348	15	2.0298e-06		0.19075	15	1.2301
WBGene00007976		0.638482	12	0.0323178		-0.17989	12	6.19603		-0.882807	12	233.867		-0.670468	12	91.5437		-0.971436	12	237.101		0.894084	12	0.02445
WBGene00007977		-0.549628	7	18.3184		0.143768	7	0.446751		-0.485299	7	5.6761		-0.682452	7	16.2833		-0.442331	7	2.50537		-0.697434	7	17.731
WBGene00007979		0.487276	14	0.0693288		-0.269953	14	19.9432		0.26338	14	0.142693		-0.158899	14	3.31731		0.784556	14	0.00149782		0.561303	14	0.122881
WBGene00007978		0.416479	7	0.213861		0.723408	7	0.0150744		-1.60804	7	643.347		-1.07374	7	97.089		0.110369	7	0.263395		0.209467	7	0.739599
WBGene00008440		0.519123	3	0.221321		-0.759898	3	13.5877		-0.993074	3	7.80177		0.0429203	3	0.552352		-0.385975	3	0.881354		-1.23407	3	11.5412
WBGene00006574		0.480356	5	0.199207		-0.627361	5	18.4423		-1.99213	5	561.172		-1.14858	5	42.5964		-1.98076	5	196.914		-0.956941	5	16.9926
WBGene00003052		1.13084	17	0.000205332		0.986565	17	2.28205e-05		0.502372	17	0.0151389		1.34222	17	4.04732e-06		-0.835358	17	787.182		0.609674	17	0.0682762
WBGene00001960		-0.361189	6	6.18858		-0.451496	6	10.7772		-0.833592	6	16.7062		-0.43243	6	4.07841		-1.92348	6	415.301		-1.4564	6	131.01
WBGene00006618		0.0208187	4	1.07943		-0.557467	4	9.27635		-0.985851	4	12.042		-0.786763	4	7.62996		-1.00981	4	5.70262		-0.7955	4	7.16237
WBGene00004115		0.344487	11	0.23575		-0.104465	11	2.91295		-1.22262	11	1155.25		-1.07618	11	880.431		-0.0936186	11	0.78904		0.544175	11	0.170261
WBGene00008439		-0.0130706	15	2.96091		-0.179694	15	9.62433		-0.305007	15	9.90892		-0.46573	15	48.2176		-0.344039	15	7.31833		-0.037477	15	5.34096
WBGene00006324		-0.171858	21	23.865		0.391087	21	0.0101212		-0.0852987	21	2.87388		-0.629945	21	1436.11		-0.664871	21	673.115		1.15815	21	0.000405446
WBGene00009453		0.502396	14	0.0620449		-0.344029	14	40.927		-0.423717	14	19.6898		-0.206997	14	4.8456		-1.0235	14	906.244		-0.665007	14	209.304
WBGene00009452		0.827757	12	0.0093369		-0.224867	12	9.12328		-1.30756	12	3434.82		-0.687799	12	103.228		-0.389192	12	5.6307		0.844375	12	0.0318746
WBGene00009451		0.229433	12	0.472944		-0.59986	12	229.691		-0.606127	12	40.6296		-1.1261	12	2153.36		0.936187	12	0.0011297		-0.338261	12	17.5137
WBGene00009455		-0.09959	12	4.09434		0.252889	12	0.149703		-0.427215	12	13.1013		-0.9991	12	892.977		-0.881924	12	133.417		0.31295	12	0.542816
WBGene00006682		-0.237168	10	7.20445		0.360519	10	0.0801209		-0.644687	10	27.9993		-1.59707	10	11486.7		-1.51465	10	1790.57		0.482892	10	0.243088
WBGene00009454		0.891696	5	0.0413035		0.882708	5	0.014268		-1.00417	5	20.1331		-1.33391	5	83.2561		-0.269089	5	0.918196		-0.331326	5	3.00274
WBGene00004484		-0.246358	5	3.21012		-0.490391	5	9.62925		-1.18284	5	36.7514		-0.18988	5	1.3299		-2.15232	5	337.239		-0.846672	5	12.5194
WBGene00009456		-0.0897571	16	5.98682		0.187966	16	0.20977		-0.0499548	16	1.51214		-0.216989	16	6.95758		0	16	0.505632		0.161004	16	1.59164
WBGene00009457		-0.858909	9	173.444		0.728804	9	0.00720439		0.0217059	9	0.706963		-0.335895	9	4.9749		0	9	0.432002		1.22734	9	0.0109328
WBGene00009458		1.33255	11	0.00053105		0.733901	11	0.00341062		-0.110479	11	1.62689		0.28195	11	0.136747		-0.387654	11	4.54399		0.958409	11	0.0217428
WBGene00023490		0.0126529	4	1.11013		0.514861	4	0.10341		-1.08735	4	16.2386		-1.29468	4	37.6441		-0.149407	4	0.575023		1.21645	4	0.0568001
WBGene00009459		0.756757	3	0.107377		-0.555727	3	6.45955		1.04902	3	0.0451324		-0.759091	3	4.69681		0	3	0.377486		1.08476	3	0.102332
WBGene00009460		1.62695	53	5.35581e-15		0.870353	53	1.53779e-11		0.563476	53	6.19882e-06		0.714552	53	2.86625e-08		0.262552	53	0.00137062		1.40206	53	1.98174e-10
WBGene00009250		0.0241762	1	0.873802		-0.732398	1	4.97802		-2.53984	1	42.0691		-0.945941	1	2.92151		1.62449	1	0.0467945		-1.48159	1	5.0246
WBGene00009251		0.113778	1	0.71348		-0.633654	1	3.87385		-2.25568	1	26.1139		-1.96966	1	17.0244		-2.55174	1	8.93199		-0.630716	1	1.65492
WBGene00009252		0.0103636	4	1.11889		0.251761	4	0.311668		-0.451271	4	2.49353		-0.718392	4	6.1548		0.164897	4	0.248718		-0.0541266	4	1.20497
WBGene00002035		0.206815	16	0.538248		0.53333	16	0.00502071		-1.36645	16	57905.8		-1.05487	16	11320.4		-0.39449	16	13.3741		-0.25512	16	26.9599
WBGene00010137		0.0377537	29	4.71456		-0.754265	29	2.31217e+06		-0.486795	29	1156.97		-0.687852	29	50710.8		-0.66622	29	9990.24		-0.168355	29	169.792
WBGene00219283		-0.0233384	6	1.48945		-0.236384	6	3.44972		0.142664	6	0.412734		0.598899	6	0.0600855		0	6	0.403825		0.0666388	6	1.10278
WBGene00010133		0.243583	2	0.521851		0.0198416	2	0.764846		-0.876215	2	3.87114		-0.794305	2	3.40739		0	2	0.369094		-0.73292	2	2.80358
WBGene00010136		0.476944	6	0.180746		-0.239947	6	3.51544		0.0486988	6	0.589338		0.503932	6	0.0886012		0.0182122	6	0.378158		1.85393	6	0.00405216
WBGene00004901		0.626117	15	0.0211363		0.599299	15	0.00326294		-0.717117	15	226.51		-0.690533	15	315.202		-0.725133	15	144.811		0.975915	15	0.00787306
WBGene00010134		0.573219	45	0.000376281		-0.0329095	45	15.681		-0.798401	45	3.04675e+07		-0.660693	45	9.37279e+06		0.30111	45	0.00131866		0.315978	45	0.731383
WBGene00010135		1.04039	7	0.0120771		-0.0634293	7	1.50031		-0.258901	7	2.18669		0.0603452	7	0.549168		1.65814	7	0.000479836		1.38747	7	0.0119349
WBGene00006765		0.0322794	9	1.4251		-0.0775183	9	1.95449		-0.490874	9	9.45006		-0.435953	9	8.6344		0.660363	9	0.0157495		0.169673	9	0.96463
WBGene00011631		0.351629	15	0.176506		-0.18942	15	10.6339		-0.421276	15	23.9584		-0.798568	15	777.041		-1.4666	15	48206		0.543192	15	0.127408
WBGene00011629		0.738768	46	1.21495e-05		1.00252	46	8.49086e-12		-0.324131	46	2420.41		-0.236427	46	759.833		-0.0863648	46	6.86519		1.6014	46	8.65881e-11
WBGene00044684		0.96713	6	0.0228876		-0.294746	6	4.69903		0.402801	6	0.15396		0.185771	6	0.325475		0.219531	6	0.182982		0.0412327	6	1.19426
WBGene00011630		0.116953	14	1.05105		0.0528894	14	0.869127		0.156097	14	0.307976		-0.173091	14	3.70974		0.561381	14	0.00774686		1.02162	14	0.00752581
WBGene00006641		-0.00622524	7	1.49892		0.505454	7	0.05391		-1.15906	7	97.0287		-1.42877	7	490.636		-0.00757661	7	0.425959		0.627687	7	0.170894
WBGene00009958		0.296593	25	0.181374		0.0100547	25	2.10842		-0.141815	25	7.4684		0.0403741	25	0.856654		-0.144606	25	3.78956		0.180365	25	2.37718
WBGene00009964		-0.0122832	1	0.948929		0	1	0.774865		-0.0516912	1	0.646601		-0.0213331	1	0.594634		0	1	0.360888		-0.0451638	1	0.770639
WBGene00009963		-0.0122832	1	0.948929		0	1	0.774865		-0.0516912	1	0.646601		-0.0213331	1	0.594634		0	1	0.360888		-0.0451638	1	0.770639
WBGene00009959		0.446472	5	0.226773		-0.332278	5	4.54784		-0.771848	5	9.20612		-0.611046	5	6.09847		0	5	0.394847		0.765964	5	0.143634
WBGene00009962		-0.115547	15	6.53946		0.0500476	15	0.912145		-0.216131	15	5.04577		-0.356603	15	19.3816		-0.303152	15	5.31279		-0.105823	15	8.2905
WBGene00219450		-0.303458	10	10.5672		0.478921	10	0.0329667		0.0186034	10	0.738437		-0.10882	10	1.55808		-0.689818	10	19.4233		-0.332798	10	10.3759
WBGene00009960		-0.790746	7	55.6236		1.0965	7	0.00170172		-0.226489	7	1.90757		-0.145847	7	1.4071		-1.59318	7	272.796		-0.819499	7	27.1918
WBGene00009961		0.685971	10	0.0347447		-0.662473	10	172.168		-1.39363	10	1697.71		-0.99438	10	311.848		-0.937266	10	75.4605		-0.965116	10	190.457
WBGene00043049		-0.061676	7	1.93513		-0.234002	7	4.06725		-1.16713	7	100.385		-0.729725	7	20.2034		-0.139968	7	0.73063		-0.252998	7	3.73747
WBGene00001568		0.228762	14	0.462531		-0.845661	14	5324.54		-0.19229	14	3.74546		-0.995054	14	2407.87		0.390825	14	0.0271976		1.18175	14	0.00284854
WBGene00007026		0.404374	3	0.313836		0.874897	3	0.0352647		-0.439191	3	1.92865		-0.367632	3	1.65224		-0.088186	3	0.458181		0.362817	3	0.445608
WBGene00004953		0.814853	9	0.0210225		0.291374	9	0.150569		-0.735711	9	32.6055		-0.691844	9	35.3672		-0.0038121	9	0.44034		0.217598	9	0.78741
WBGene00009346		1.12335	4	0.0244761		-0.224628	4	2.29744		-2.1075	4	327.801		-1.58962	4	95.108		1.30408	4	0.0119255		0.6913	4	0.200754
WBGene00009341		0.824099	10	0.0156401		0.546613	10	0.0198418		-0.373731	10	6.34145		-0.574748	10	25.3176		-0.220962	10	1.48442		-0.51205	10	23.6747
WBGene00050880		0.395627	5	0.275458		0.879749	5	0.0144698		0.6948	5	0.0658679		1.0507	5	0.0149833		-0.0380139	5	0.444841		-0.347072	5	3.13663
WBGene00009342		0.613359	60	1.48134e-05		0.39344	60	1.37019e-05		0.0587282	60	1.02257		-0.11526	60	172.282		-0.599214	60	4.69816e+07		0.878313	60	2.13461e-06
WBGene00009345		0.202059	15	0.561073		-0.166645	15	8.41875		0.0750474	15	0.552936		-0.486069	15	57.145		0.123203	15	0.188348		0.229723	15	0.957298
WBGene00006532		0.0456504	16	1.99306		0.144	16	0.337365		-0.825554	16	758.054		-0.33225	16	19.2409		0.579489	16	0.00411479		-0.0187528	16	5.40369
WBGene00009344		0.11707	7	0.84941		0.198195	7	0.324986		-1.00369	7	50.42		-0.661012	7	14.7657		-0.354893	7	1.75432		0.261651	7	0.616035
WBGene00009343		1.46341	11	0.00023689		1.07216	11	0.000223905		0.45548	11	0.0575899		0.444345	11	0.0479176		1.91341	11	5.09558e-06		1.23593	11	0.0054765
WBGene00009480		1.61021	6	0.00152124		0.0862294	6	0.624922		-0.173238	6	1.3669		-1.39069	6	205.321		0.6259	6	0.0422703		0.967078	6	0.0654381
WBGene00009478		0.0511709	1	0.822038		0	1	0.774865		-0.110485	1	0.713648		-0.0661816	1	0.642368		0.0312997	1	0.34696		0.0687997	1	0.664124
WBGene00009479		-0.163586	19	16.5957		-0.825439	19	54185.7		-0.531805	19	157.171		-0.883027	19	9784.95		-1.32366	19	206951		-1.39316	19	416510
WBGene00009477		0.458649	28	0.0201845		0.161744	28	0.170614		-0.762807	28	33663		-0.820464	28	241192		-0.00925591	28	0.753414		0.682092	28	0.0103207
WBGene00009481		-0.0215857	4	1.24865		-0.792024	4	24.8044		-1.72377	4	105.856		-1.1039	4	20.6698		0.367859	4	0.144766		-0.0256513	4	1.12524
WBGene00009476		-0.956593	9	293.582		0.478177	9	0.0411126		-2.02446	9	22101.1		-1.18769	9	543.509		2.59078	9	9.83936e-07		1.33005	9	0.00707604
WBGene00009475		-0.703229	8	52.7871		-0.461368	8	20.7994		-0.727121	8	22.1554		-0.641671	8	19.0427		-0.0823489	8	0.614149		0.964854	8	0.0417523
WBGene00006525		-0.133069	16	8.51115		-0.301087	16	41.4122		-0.409502	16	26.9954		-0.840146	16	1701.67		0.306359	16	0.039736		0.253259	16	0.849964
WBGene00007854		0.500627	16	0.0494883		-0.40635	16	129.175		-1.09892	16	6782.42		-0.756682	16	814.663		0.377661	16	0.021983		0.0161601	16	4.26175
WBGene00000058		0.0855403	21	1.78386		0.214725	21	0.11068		-1.26927	21	464023		-1.07583	21	211200		-0.158776	21	3.06967		0.732799	21	0.0159361
WBGene00007858		-0.0921822	1	1.13693		-0.143715	1	1.1162		-0.0940283	1	0.69421		-0.088718	1	0.667783		0	1	0.360888		-0.140144	1	0.872351
WBGene00007855		-0.0921822	1	1.13693		-0.143715	1	1.1162		-0.0940283	1	0.69421		-0.088718	1	0.667783		0	1	0.360888		-0.140144	1	0.872351
WBGene00007857		0.328956	10	0.273435		-0.282309	10	9.9458		-0.564242	10	18.0162		-0.938274	10	222.913		-0.418821	10	4.39378		-0.559366	10	29.4342
WBGene00007856		0.171747	7	0.660289		-0.156145	7	2.57992		-0.257592	7	2.17467		-0.241074	7	2.17291		-0.0887471	7	0.592976		0.992839	7	0.0475549
WBGene00001843		0.625825	19	0.0107982		-0.408534	19	300.433		-1.0464	19	18669.5		-0.479348	19	156.416		-0.728473	19	639.116		0.343034	19	0.461083
WBGene00012296		0.371578	3	0.34678		0.115326	3	0.56076		-1.36663	3	20.023		-2.70703	3	850.363		0.0584749	3	0.33198		0.149116	3	0.688787
WBGene00012297		-0.323574	6	5.28108		-1.87013	6	19730.7		-1.46836	6	185.309		-0.717202	6	13.0698		0	6	0.403825		-0.454453	6	5.65413
WBGene00012298		0.210612	7	0.552053		-0.310639	7	6.36648		-0.894151	7	31.7809		-0.811108	7	29.289		-0.323417	7	1.54311		-0.11056	7	2.26922
WBGene00006503		-2.35224	4	3738.05		0.263633	4	0.296533		-1.15177	4	19.6314		-1.28826	4	36.8917		-2.09629	4	103.342		0.0827646	4	0.867053
WBGene00004298		-0.266252	18	35.9936		-1.54712	18	1.77024e+08		-0.627369	18	282.506		-0.71019	18	1144.4		-0.491587	18	49.7098		-0.136545	18	17.0923
WBGene00011531		-0.598869	13	147.658		-1.10549	13	34340.5		-0.631147	13	64.404		-0.811653	13	371.855		-0.619129	13	33.7366		-0.340548	13	22.7645
WBGene00303078		-0.388887	3	3.50964		-1.12212	3	50.826		-0.249389	3	1.19474		-0.711684	3	4.13861		-1.34335	3	7.22042		-1.08106	3	8.44953
WBGene00011532		-0.0371963	6	1.57906		-1.0227	6	221.917		-0.881537	6	20.0358		-1.08988	6	60.0018		-0.260546	6	1.03326		0.0779933	6	1.06419
WBGene00077558		-0.118015	1	1.20535		0.00571408	1	0.763701		-0.389648	1	1.14008		-0.211677	1	0.825231		-0.128132	1	0.423984		0	1	0.726523
WBGene00003182		-0.28787	10	9.65698		-0.51363	10	56.3797		-0.952549	10	151.34		-0.752117	10	73.1745		-1.06332	10	150.653		-0.0752666	10	3.17188
WBGene00001574		-0.363395	19	106.308		-0.5461	19	1668.04		-0.692859	19	700.993		-0.307748	19	26.9585		-0.820291	19	1558.97		-0.0329892	19	8.98855
WBGene00012376		-0.714583	17	1366.67		-1.96044	17	7.86304e+09		-0.39003	17	28.2219		0.0458468	17	0.69578		-1.19483	17	18431.8		0.871144	17	0.0104837
WBGene00014115		0.468588	13	0.0885074		0.622922	13	0.00462002		-0.0379278	13	1.1757		0.0934548	13	0.456838		0.883328	13	0.00107156		1.1998	13	0.00349575
WBGene00014116		0.170444	6	0.658014		-0.135324	6	2.02006		1.12664	6	0.00990283		0.899546	6	0.017571		-0.0452871	6	0.475459		1.35335	6	0.0194814
WBGene00014121		0.718821	4	0.0982		0.467246	4	0.126262		0.188538	4	0.378715		0.484316	4	0.14055		0.432779	4	0.121755		1.08544	4	0.0778286
WBGene00014117		1.59613	11	0.000104459		0.746612	11	0.00307883		0.613526	11	0.022654		1.35053	11	0.000137772		-0.298235	11	2.66815		0.848069	11	0.0376182
WBGene00003209		-0.038236	6	1.586		-0.202875	6	2.88882		-1.11941	6	49.3651		-0.456991	6	4.50934		-0.00609109	6	0.412793		-0.439387	6	5.39314
WBGene00014118		0.75589	9	0.0288836		-0.251503	9	6.54803		-0.093835	9	1.26829		-0.156187	9	1.84811		0	9	0.432002		-0.23661	9	5.39184
WBGene00014119		0.355758	36	0.0455803		0.368803	36	0.00133978		0.179193	36	0.108268		0.0192124	36	1.56595		-0.560999	36	16237.4		-0.0638969	36	143.678
WBGene00014120		0.8364	19	0.00152517		0.769746	19	0.000126279		0.0606755	19	0.642085		0.331684	19	0.0384917		-0.731496	19	658.16		0.636863	19	0.0452717
WBGene00010421		0.0281344	9	1.45728		-0.589872	9	68.7522		-1.52386	9	1756.69		-0.840143	9	80.0746		-0.801784	9	24.0828		-0.0500899	9	2.44695
WBGene00010422		0.902888	3	0.0688255		0.386446	3	0.2089		0.233031	3	0.353704		0.551808	3	0.14203		0	3	0.377486		0	3	0.933378
WBGene00009129		0.226589	12	0.48185		-0.142146	12	4.47815		-0.17737	12	2.69721		-0.0305037	12	1.08462		-0.0208267	12	0.528301		-0.617463	12	77.6666
WBGene00077773		-0.727743	4	14.1152		0.166669	4	0.445301		-2.99104	4	4425.05		-3.00305	4	8075.61		-3.60876	4	5831.57		-2.08374	4	158.536
WBGene00009128		1.05714	2	0.0602837		0.0324818	2	0.73554		-2.07783	2	48.3126		-1.81064	2	31.7245		-2.81731	2	47.9077		-1.55239	2	11.0308
WBGene00009127		-0.368971	16	57.8329		-1.10506	16	245820		-1.5609	16	275225		-1.71701	16	3.90565e+06		0.771059	16	0.000838682		-0.81977	16	1253.75
WBGene00001167		0.649501	24	0.00356341		-0.435797	24	1785.58		0.160222	24	0.217173		-0.209211	24	19.5676		-1.19645	24	1.11793e+06		0.880308	24	0.00246896
WBGene00009126		0.26637	27	0.243784		0.0868438	27	0.628792		0.135662	27	0.269291		-0.23602	27	43.1042		0.422756	27	0.00217946		1.20187	27	4.20023e-05
WBGene00009130		-1.22196	5	134.028		0.219234	5	0.332224		-2.56963	5	3925.25		-1.51221	5	158.642		0	5	0.394847		-0.14731	5	1.80347
WBGene00009125		0.117535	5	0.798035		-0.656655	5	21.1921		-1.38121	5	71.6892		-1.21611	5	54.3772		-0.533595	5	2.10474		2.63644	5	0.000806669
WBGene00006407		-0.0181669	88	1331.96		-0.188544	88	706508		-0.555135	88	2.45393e+10		-0.579241	88	1.04797e+12		-0.203509	88	13471.3		0.351609	88	0.337801
WBGene00008107		0.713062	28	0.000775351		0.747542	28	6.30804e-06		0.0576802	28	0.731206		0.373142	28	0.00727257		0.197889	28	0.041985		0.179264	28	2.87441
WBGene00001590		0.713248	4	0.100097		-1.26539	4	180.538		-0.805312	4	7.07517		-1.78677	4	176.712		-2.2034	4	137.504		0.540733	4	0.288319
WBGene00044008		-0.449325	12	40.6038		0.090302	12	0.606265		-0.632463	12	47.995		-0.255289	12	5.15112		0.266548	12	0.0833971		0.0749132	12	1.93257
WBGene00000147		-0.72758	7	41.5807		-1.01096	7	382.08		-0.958483	7	41.6757		-0.997595	7	68.5921		0	7	0.413007		-1.09065	7	70.3011
WBGene00009498		-0.438172	41	49055.8		-0.343654	41	25002.6		0.0231812	41	1.60879		-0.174806	41	100.094		-0.175177	41	29.708		0.156138	41	9.02263
WBGene00009499		0.65092	12	0.0297855		0.222259	12	0.194833		-0.550025	12	28.4913		-0.891216	12	422.768		-0.243649	12	2.21065		1.79386	12	0.000201227
WBGene00044247		-0.649268	3	7.75255		-1.67283	3	377.706		0.27556	3	0.317715		0.183456	3	0.379599		-0.00426489	3	0.381039		1.75314	3	0.0262103
WBGene00194653		0.177412	3	0.626195		-0.564688	3	6.67385		-0.163622	3	0.962252		0.774107	3	0.0784729		-0.469017	3	1.05774		0.217257	3	0.599485
WBGene00009500		1.21853	36	4.86724e-08		-0.186875	36	248.521		0.32737	36	0.00943698		0.486047	36	0.00030566		0.284174	36	0.00519011		1.57387	36	1.28808e-08
WBGene00008779		0.587809	18	0.0179277		-0.319168	18	78.8411		-0.54736	18	139.037		-0.550302	18	239.882		-1.52527	18	700359		0.433782	18	0.232852
WBGene00008780		0.219107	31	0.422024		-0.599296	31	304306		-0.702643	31	41550		-0.73463	31	221468		-0.0448129	31	1.40926		0.248298	31	1.47096
WBGene00008781		0.00204343	18	3.3015		-0.148388	18	10.3142		-0.264484	18	11.3378		-0.384668	18	47.5364		0.0187603	18	0.444697		0.283057	18	0.724685
WBGene00009173		1.1984	6	0.00863312		0.519112	6	0.0631345		-0.91031	6	22.3448		-1.52295	6	352.653		-0.295975	6	1.17406		-0.755051	6	14.5167
WBGene00009174		-0.165646	14	8.36841		-0.114754	14	4.42245		-0.158332	14	2.93594		-0.0572322	14	1.48915		-0.768547	14	138.663		-0.283518	14	20.6807
WBGene00009176		0.0608871	4	0.940656		0.217829	4	0.359323		-2.15054	4	372.112		-1.3187	4	40.5952		-0.281903	4	0.818695		-0.891585	4	9.02362
WBGene00004268		0.000785739	3	1.07196		-0.5043	3	5.35622		0.2694	3	0.322691		0.570386	3	0.135159		-0.959696	3	3.1083		-0.12106	3	1.19454
WBGene00006732		0.526619	6	0.146596		-0.220682	6	3.17447		-1.40298	6	144.628		-0.694134	6	11.8931		-0.0925607	6	0.563823		-0.0838548	6	1.76809
WBGene00009177		0.515678	7	0.135419		-0.551481	7	26.0283		-2.22457	7	8640.87		-1.18836	7	163.8		-0.360022	7	1.79138		0.213198	7	0.729995
WBGene00009178		0.1148	33	1.93143		-0.0367433	33	7.63213		-0.970735	33	4.75458e+06		-0.645085	33	105893		0.453443	33	0.000459714		0.366701	33	0.336927
WBGene00002026		0.682264	11	0.0293392		0.633005	11	0.00768486		-1.58262	11	9674.55		-1.14143	11	1341.8		1.33797	11	0.000156749		0.459087	11	0.259843
WBGene00007533		-0.0688094	7	1.99978		-0.0172436	7	1.14527		-0.109029	7	1.16293		-0.0741027	7	1.01426		-0.00142451	7	0.415412		0	7	1.54054
WBGene00003026		0.920145	29	4.11349e-05		-0.965799	29	1.03541e+08		-0.89594	29	290880		-1.06422	29	1.42541e+07		-0.12653	29	4.1929		0.56431	29	0.0355647
WBGene00010857		0.258728	11	0.40015		-0.141467	11	3.92391		-0.186208	11	2.54397		0.134158	11	0.355133		-0.375395	11	4.22412		-0.0528265	11	3.30579
WBGene00010856		0.129315	8	0.82358		-0.271161	8	6.1595		-1.14006	8	150.263		-0.223082	8	2.31259		0	8	0.422398		1.11775	8	0.023107
WBGene00010858		0.118188	3	0.749883		-0.141831	3	1.43064		0.576502	3	0.148685		0.0987729	3	0.47586		0	3	0.377486		0.417549	3	0.398578
WBGene00010859		-0.931264	6	68.4431		0.549931	6	0.0536274		-0.506466	6	4.83427		-0.14802	6	1.27455		-1.35134	6	52.7695		-0.539096	6	7.3735
WBGene00001121		0.388047	14	0.143644		-0.520488	14	226.854		-1.75465	14	274913		-1.55293	14	195155		0.664035	14	0.00363798		-0.0260773	14	4.33726
WBGene00008878		-0.291839	82	8.67181e+06		-0.873144	82	3.02818e+19		-0.890912	82	833993828199034		-0.724927	82	5.50175e+13		-0.614714	82	6.92201e+10		0.131546	82	315.005
WBGene00008877		0.491615	7	0.151293		-0.741872	7	79.23		-1.0822	7	70.1884		-1.55421	7	869.656		0	7	0.413007		0.0465912	7	1.30855
WBGene00008876		-0.191816	27	72.2005		-0.54874	27	28521.1		-0.846206	27	67662.1		-0.73281	27	45975.1		-0.27227	27	25.3437		0.235231	27	1.47722
WBGene00007641		1.04177	8	0.00861901		-0.486959	8	24.4995		-0.502361	8	7.81573		-1.71006	8	4137.53		0.702465	8	0.0173418		0.823164	8	0.0722411
WBGene00219310		0.264831	5	0.454291		-0.817604	5	45.4782		1.02164	5	0.0219066		-0.0676506	5	0.854807		0.108553	5	0.280917		0.00564919	5	1.18051
WBGene00007642		-0.602795	8	31.9566		-0.464673	8	21.2438		0.190247	8	0.315168		0.0938031	8	0.468749		1.06465	8	0.00334312		-0.0577458	8	2.18332
WBGene00219313		0.638925	8	0.0645253		-0.591126	8	47.7082		-1.86906	8	4410.99		-1.95198	8	13993.6		0.515619	8	0.0405431		1.38371	8	0.00825662
WBGene00007643		-0.261013	9	6.92034		-0.74508	9	202.161		-1.73299	9	5059.57		-2.02782	9	55680.8		1.25665	9	0.000791772		0.857766	9	0.0523098
WBGene00007644		0.855847	3	0.07942		-0.758055	3	13.4968		-1.18889	3	12.7869		-1.65907	3	51.8735		0	3	0.377486		2.30686	3	0.00848042
WBGene00044236		0.243647	3	0.511867		-1.23538	3	76.7761		-0.839697	3	5.29814		-0.83957	3	5.82216		0	3	0.377486		1.6927	3	0.0296457
WBGene00003904		0.0214059	8	1.41219		0.491313	8	0.0468765		1.08782	8	0.00491418		0.156305	8	0.342155		0.463856	8	0.0512972		0.151049	8	0.9733
WBGene00007645		-0.502538	21	668.111		-0.908191	21	455469		-0.845185	21	6325.26		-1.0887	21	243916		0.61982	21	0.000768438		0.741546	21	0.0147773
WBGene00007646		0.727022	10	0.0274073		0.211038	10	0.24584		-0.846048	10	84.4206		-0.825703	10	113.656		0.00291006	10	0.434829		-0.400887	10	14.1942
WBGene00007647		-0.434633	13	47.1503		-0.21383	13	9.79676		-0.78116	13	177.244		-1.17798	13	5602.61		-0.270114	13	3.04239		-0.550593	13	75.3885
WBGene00003172		-0.355655	24	289.866		-0.143803	24	20.9965		-0.691074	24	3549.41		-1.17929	24	4.03408e+06		-0.388979	24	65.954		0.161673	24	2.68745
WBGene00009754		0.211314	4	0.561135		0.119067	4	0.543678		-0.374902	4	1.99121		-0.59338	4	4.15533		-0.00607235	4	0.392371		0.420216	4	0.385218
WBGene00009755		0.33179	5	0.351643		-1.37054	5	626.763		-0.941819	5	16.3196		-1.53528	5	172.441		0	5	0.394847		0.00355492	5	1.18738
WBGene00006681		-0.0995731	13	4.59259		-0.114169	13	3.93447		-0.535405	13	33.7527		-0.209711	13	4.31192		0.00595966	13	0.453628		-0.0285707	13	3.84447
WBGene00004808		-1.48205	4	188.257		-0.845818	4	31.0809		-0.45784	4	2.54225		-0.619125	4	4.50547		0.546654	4	0.0898694		-0.685915	4	5.50348
WBGene00004807		-1.83007	7	6675.7		-0.814973	7	121.481		-1.51439	7	433.592		-2.01689	7	7182.34		-1.66974	7	372.695		-0.190175	7	2.99917
WBGene00009260		-0.278438	5	3.62921		-0.311192	5	4.11488		-0.457076	5	3.18882		-0.77617	5	11.0798		-0.148003	5	0.628077		-0.512739	5	4.96357
WBGene00045473		-0.147879	3	1.68535		-1.39152	3	135.58		-2.30743	3	215.004		-1.99057	3	125.652		-1.64013	3	13.8582		-0.302382	3	1.72852
WBGene00009268		0.00550834	1	0.911494		-0.0758492	1	0.93948		-0.838308	1	2.42053		-1.09244	1	3.75967		-0.250821	1	0.494712		-0.000110058	1	0.726627
WBGene00044680		0.356385	1	0.412123		1.28363	1	0.0297434		-1.2325	1	4.69017		-1.45693	1	7.04193		-0.266208	1	0.504378		0.306476	1	0.486991
WBGene00009261		-0.0237131	7	1.62466		0.614956	7	0.0284199		-1.55003	7	503.839		-0.612884	7	11.8543		0.611687	7	0.0341419		1.5163	7	0.00759991
WBGene00009269		0.101628	2	0.760502		-0.0765286	2	1.03024		-0.154257	2	0.849583		-0.787792	2	3.35902		0	2	0.369094		-0.505573	2	1.91722
WBGene00195244		-0.089948	1	1.13119		-0.0615336	1	0.905936		-0.567904	1	1.5376		-0.595698	1	1.59853		0	1	0.360888		0	1	0.726523
WBGene00009263		-0.313638	5	4.15227		-0.287765	5	3.68203		-1.0642	5	24.6453		-0.93665	5	19.7948		0	5	0.394847		-0.00747633	5	1.22422
WBGene00006061		-0.285001	3	2.55825		-0.289602	3	2.45056		-2.17275	3	153.063		-2.24646	3	248.752		-0.138183	3	0.511374		-0.104324	3	1.15448
WBGene00009264		0.175682	22	0.724612		-0.408557	22	682.67		-1.09246	22	127284		-0.804768	22	15465.7		0.324717	22	0.0156375		-0.573992	22	1764.82
WBGene00009262		0.381281	9	0.217375		-0.143807	9	3.09806		-0.904491	9	76.5719		-0.769452	9	54.2404		0.778479	9	0.00871003		-0.287228	9	6.68113
WBGene00006062		-0.409065	19	162.527		-0.90621	19	148248		-0.0813007	19	2.39892		-1.39755	19	1.90576e+06		-1.49209	19	1.06234e+06		0.539116	19	0.0979807
WBGene00009266		-0.0141367	7	1.55455		-0.244046	7	4.31327		0.0597205	7	0.571182		0.0667007	7	0.533471		-0.0889087	7	0.593367		0.503088	7	0.264417
WBGene00009267		0.57259	29	0.00404516		0.660336	29	2.10188e-05		-0.0652014	29	3.88953		-0.00131778	29	1.73057		-0.169233	29	7.75764		1.11251	29	6.28612e-05
WBGene00004887		1.14061	4	0.0230674		-0.62935	4	12.5396		-0.378334	4	2.01144		-1.22329	4	30.0793		2.05459	4	0.00161195		-0.824055	4	7.67135
WBGene00002226		1.1992	16	0.000169878		1.03624	16	2.18943e-05		0.92798	16	0.000595784		0.454351	16	0.0185938		-0.156598	16	1.8556		-0.304504	16	37.7186
WBGene00077771		-0.359447	8	9.47187		-1.27382	8	3762.73		-0.907001	8	51.0073		-0.857962	8	56.6041		-2.85966	8	186436		-0.445466	8	9.78737
WBGene00008061		-0.524736	6	12.3318		-0.804454	6	69.8641		-1.73544	6	510.021		-2.04954	6	3038.1		-0.659402	6	4.35327		-1.03409	6	34.8333
WBGene00008062		0.988913	7	0.0153089		0.853486	7	0.00704603		-0.215188	7	1.81887		-0.298949	7	2.82967		-0.169349	7	0.823571		0.930451	7	0.0591711
WBGene00000096		0.0871198	18	1.54781		0.250954	18	0.0887016		-0.487102	18	81.5146		-0.355405	18	35.7134		-0.597641	18	132.467		-0.735672	18	1558.6
WBGene00008063		-0.251482	2	1.94061		-0.354813	2	2.43499		-0.377673	2	1.35839		-0.800962	2	3.45755		-0.611909	2	1.06201		-0.678897	2	2.56151
WBGene00077525		0.313227	9	0.313654		0.151267	9	0.398633		-0.689007	9	25.745		-0.83732	9	78.8383		0.492162	9	0.0366096		-0.405437	9	11.0231
WBGene00008064		0.0590925	5	0.997946		-0.0145009	5	1.00701		-0.726786	5	7.90972		-0.767201	5	10.7262		-0.363536	5	1.23473		0.128232	5	0.840576
WBGene00219284		0.0566653	3	0.904308		0	3	0.853476		-0.932639	3	6.69837		-1.11737	3	12.2201		-0.481278	3	1.08662		0.199388	3	0.621717
WBGene00007984		0.4221	13	0.122267		-1.16437	13	58866.7		-0.630746	13	64.2297		-0.125371	13	2.30917		0.489623	13	0.0161696		-0.325825	13	20.9317
WBGene00007985		-0.154113	46	601.886		-0.726424	46	2.8803e+09		-1.16682	46	9.04847e+10		-1.17453	46	1.83839e+12		-1.09533	46	4.45505e+10		-0.950205	46	4.47142e+09
WBGene00004372		0.161932	17	0.784989		-0.177745	17	12.64		-0.280324	17	11.1824		-0.541982	17	164.583		-0.360277	17	12.1941		0.21534	17	1.1522
WBGene00007986		-1.42218	9	3607.2		0.79227	9	0.00463513		1.64353	9	0.000193451		1.25043	9	0.000795364		-2.47109	9	104067		1.13213	9	0.0163637
WBGene00009646		-1.69655	11	69338.3		0.157912	11	0.352279		1.91033	11	1.07246e-05		1.47511	11	6.16297e-05		-2.49018	11	1.24253e+06		-1.15065	11	772.794
WBGene00002276		1.62464	13	2.86585e-05		0.160165	13	0.31937		-0.297812	13	6.79158		0.124875	13	0.362012		-0.200274	13	1.87986		0.687653	13	0.0647959
WBGene00044987		-0.627155	5	13.7753		-0.820413	5	46.0885		-1.15803	5	33.8046		-1.55173	5	183.009		-1.60969	5	61.4982		0.0190674	5	1.13743
WBGene00010608		-0.132957	5	2.08037		-1.01777	5	117.554		-0.908161	5	14.5705		-1.70844	5	322.532		-1.10649	5	12.6909		1.40714	5	0.0243104
WBGene00010617		-0.0419572	4	1.33914		-0.443318	4	5.74778		0.209722	4	0.355805		-0.183207	4	1.14506		-0.484553	4	1.40541		-0.855024	4	8.2643
WBGene00010609		0.607855	13	0.0336188		0.90869	13	0.00033775		0.649507	13	0.0113646		0.663028	13	0.00673209		-1.95244	13	330983		-0.401014	13	32.134
WBGene00010610		-1.1733	5	111.262		-0.484846	5	9.37922		-1.88638	5	393.018		-1.25955	5	63.6253		-0.747379	5	4.11507		-0.92004	5	15.3412
WBGene00010611		0.102245	6	0.877203		-0.642018	6	29.5582		-0.71042	6	10.4737		-0.912205	6	29.0141		-0.0277454	6	0.446316		-0.178351	6	2.37813
WBGene00010612		1.2684	8	0.00277721		0.0307726	8	0.892485		2.13506	8	3.8286e-05		2.29408	8	7.21152e-06		-0.729945	8	11.6572		3.21026	8	7.03675e-06
WBGene00010613		0.31075	3	0.41731		-0.761217	3	13.6531		0.576404	3	0.148722		-0.0190923	3	0.651768		-0.179205	3	0.559598		1.21061	3	0.079182
WBGene00010614		0.579391	11	0.0553448		0.136605	11	0.418205		-0.333036	11	6.05271		-0.565045	11	32.4527		0.963283	11	0.00145912		0.74555	11	0.0626044
WBGene00219285		0.748186	3	0.110215		-0.172548	3	1.59998		-1.22896	3	14.1473		-1.31086	3	20.4807		0	3	0.377486		-0.0649073	3	1.06537
WBGene00000177		0.107862	4	0.800509		0.0384408	4	0.762377		0.222921	4	0.342237		0.00169903	4	0.640439		0	4	0.386069		-0.190262	4	1.67154
WBGene00010619		-0.243455	5	3.17466		0.588676	5	0.0575715		0.448995	5	0.150742		-0.97262	5	22.5444		0.19984	5	0.21098		-1.43784	5	64.399
WBGene00002070		0.737032	9	0.0319727		0.212832	9	0.259879		-0.357624	9	4.81625		-1.35389	9	1358.14		0.603921	9	0.0209022		1.10256	9	0.0185473
WBGene00010615		0.113749	8	0.890199		-0.65226	8	70.5435		-0.0689092	8	1.04785		-0.43843	8	6.84157		-0.647664	8	8.02004		1.29001	8	0.0118649
WBGene00010616		-0.264381	3	2.40263		-0.416159	3	3.88546		-0.0419419	3	0.707869		0.0512781	3	0.540168		-0.640082	3	1.54024		-0.265372	3	1.60295
WBGene00004312		1.19272	7	0.0059872		0.711305	7	0.0161797		0.236328	7	0.271405		1.03164	7	0.00652887		-0.320973	7	1.52781		1.90707	7	0.00193335
WBGene00003036		2.04865	10	1.3216e-05		0.493475	10	0.0295574		0.598343	10	0.0307862		0.0936304	10	0.463949		1.52272	10	0.000104301		1.4059	10	0.0034754
WBGene00011488		-0.372687	12	24.56		0.900984	12	0.000567429		0.144553	12	0.351959		-0.134769	12	2.23422		-1.62118	12	15403.9		1.79742	12	0.00019744
WBGene00004488		-0.182733	21	26.6286		-0.0609715	21	4.65612		-0.603155	21	545.043		-0.894149	21	27638.4		-0.9469	21	13572.2		0.214469	21	1.39758
WBGene00011489		0.0599324	9	1.22783		-0.497799	9	36.2592		-0.941537	9	92.3531		-0.609859	9	22.5115		-1.14416	9	134.084		0.0856662	9	1.37688
WBGene00002027		-0.233138	21	44.2515		0.140489	21	0.302933		0.224424	21	0.124753		0.282787	21	0.0525162		1.26371	21	8.07608e-07		-0.139398	21	29.6399
WBGene00011490		-0.161881	6	2.67105		-0.123231	6	1.89475		0.161514	6	0.384271		0.0440402	6	0.581089		-0.039755	6	0.466068		0.00254253	6	1.34836
WBGene00011491		1.12794	11	0.00187648		-0.156459	11	4.4273		-0.540914	11	20.6495		-0.806743	11	154.552		-1.20957	11	606.46		-0.515377	11	32.9099
WBGene00011492		-0.0446103	11	2.59988		0.218968	11	0.215472		0.632333	11	0.0202735		0.066761	11	0.548781		-0.512024	11	9.52884		1.45702	11	0.00182577
WBGene00011493		0.347322	3	0.37335		-0.0715645	3	1.10761		-0.565827	3	2.65473		0.990498	3	0.044046		0	3	0.377486		0.449615	3	0.373365
WBGene00194656		-0.252465	1	1.63383		1.35582	1	0.024761		-0.783714	1	2.20863		-0.959573	1	2.99089		-1.8617	1	3.75056		-0.177806	1	0.916306
WBGene00011494		-0.48677	9	23.355		0.00810579	9	1.07801		-0.889437	9	70.9574		-1.40194	9	1769.79		-1.00704	9	67.412		0.319554	9	0.511267
WBGene00000968		0.305487	5	0.388863		0.276866	5	0.252745		0.688272	5	0.0673321		0.385628	5	0.165972		-0.0848909	5	0.515291		0.505799	5	0.295316
WBGene00011497		-1.19666	10	1843.06		-0.446906	10	34.1809		-1.6145	10	5696.52		-2.01591	10	140816		-1.10784	10	192.317		-0.747421	10	69.9367
WBGene00011495		0.526313	16	0.040169		-0.0915462	16	4.30171		-1.24465	16	21812.4		-1.08402	16	14642.2		-0.107901	16	1.2385		-0.171648	16	15.2832
WBGene00007278		0.143113	7	0.753385		-1.9451	7	89977.9		-0.030555	7	0.835528		0.308801	7	0.176738		-2.51717	7	11783.8		-1.85695	7	1029.89
WBGene00007277		0.421489	12	0.134168		0.444976	12	0.0286803		0.74988	12	0.00764666		1.01711	12	0.000761861		-1.72898	12	30786.7		0.0333424	12	2.41239
WBGene00219796		0.366753	2	0.376388		0.891045	2	0.0517731		1.12669	2	0.057626		1.84515	2	0.0103744		-1.85634	2	9.11127		-0.697288	2	2.64147
WBGene00003800		0.627584	15	0.0208978		0.574544	15	0.00420604		-0.646973	15	132.974		-0.27347	15	9.67965		0.314413	15	0.0421222		-0.0129532	15	4.56141
WBGene00000466		-0.451584	12	41.21		0.167644	12	0.311681		-0.980899	12	434.968		-1.14367	12	2432.27		-0.86078	12	116.471		0.0307264	12	2.44629
WBGene00007275		-0.200662	10	5.83425		-0.434549	10	31.1554		-1.7064	10	9426.69		-1.43355	10	4317.48		1.04291	10	0.00144925		0.13298	10	1.21649
WBGene00004437		0.107495	3	0.774691		-0.859785	3	19.5497		-2.96233	3	1122.24		-2.69342	3	820.03		2.45622	3	0.00171189		-0.218064	3	1.45563
WBGene00007297		1.05516	22	7.28106e-05		-0.0522151	22	4.46608		0.157382	22	0.238557		-0.101925	22	4.24832		-0.0657873	22	1.20267		0.171332	22	2.15888
WBGene00002069		-0.492561	17	206.428		-0.0640515	17	3.47463		-1.31691	17	70378.3		-0.313768	17	19.7131		-1.89717	17	8.73511e+06		-0.298888	17	45.9117
WBGene00004426		-0.610276	4	9.42934		-0.124109	4	1.50726		-0.209544	4	1.22342		0.342646	4	0.219368		2.52046	4	0.000465422		0.786389	4	0.159727
WBGene00007299		-0.345956	2	2.49337		-0.188354	2	1.45562		-0.136037	2	0.817681		-0.216098	2	0.957545		1.71362	2	0.0191314		0.491332	2	0.362221
WBGene00077685		0.0900045	1	0.752902		0.0456322	1	0.690072		0.277988	1	0.371853		0.380015	1	0.297954		-0.0479205	1	0.383304		0.104856	1	0.633593
WBGene00007301		-0.194414	3	1.94179		0	3	0.853476		-1.20006	3	13.1526		-0.776304	3	4.91761		-0.234965	3	0.632521		0	3	0.933378
WBGene00007302		-0.418263	7	10.0019		0.32073	7	0.158753		-0.423879	7	4.38191		-0.991366	7	66.6702		0	7	0.413007		-0.558489	7	10.898
WBGene00219286		0.0229539	1	0.876222		-0.267099	1	1.52698		-0.072449	1	0.669521		-0.0947791	1	0.674788		0	1	0.360888		0	1	0.726523
WBGene00007303		0.44183	2	0.308415		0.0833722	2	0.628482		-0.280284	2	1.10708		-0.645858	2	2.45976		-0.673508	2	1.18123		1.80261	2	0.040463
WBGene00001405		0.141792	5	0.727321		-0.944476	5	83.027		-1.46578	5	95.3149		-0.506521	5	4.17901		-0.605001	5	2.63302		0	5	1.19913
WBGene00007621		0.0563654	4	0.955377		-0.214217	4	2.1993		-0.503685	4	2.90983		-0.37	4	2.05944		-0.0194732	4	0.406645		0	4	1.05794
WBGene00007620		-0.561822	41	448142		-0.140112	41	167.732		-1.10434	41	2.0151e+09		-1.09418	41	1.78354e+10		-0.619164	41	217680		0.0758564	41	32.4868
WBGene00001145		-1.20386	17	88043		-0.0790891	17	4.1218		-1.86539	17	7.20301e+06		-1.85687	17	3.36122e+07		-1.88166	17	7.62423e+06		-0.340166	17	61.7147
WBGene00000430		-0.00473528	3	1.09013		0.00762839	3	0.830091		-1.09888	3	10.1889		-0.646165	3	3.47467		-0.0328869	3	0.405768		0.691679	3	0.227982
WBGene00001582		-0.0842903	23	12.2804		-0.888604	23	1.02437e+06		-1.29329	23	1.89631e+06		-1.59106	23	3.29159e+08		-0.86812	23	13864.9		-0.00420724	23	11.8918
WBGene00010487		0.0622562	5	0.985942		0.234798	5	0.308577		-1.28025	5	51.0221		-1.41638	5	112.181		-0.00294034	5	0.398505		0.109517	5	0.885309
WBGene00010488		0.0840478	5	0.907092		-0.0446516	5	1.16188		-1.25217	5	46.419		-0.625214	5	6.41905		0	5	0.394847		0.0217686	5	1.12895
WBGene00044607		0.0802985	3	0.841544		-0.360558	3	3.17319		-0.0723156	3	0.764251		-0.727315	3	4.31491		0	3	0.377486		0.404485	3	0.409332
WBGene00006352		-0.0603581	16	4.71504		-0.205445	16	14.7309		-1.0761	16	5648.3		-0.464882	16	62.0262		-0.521594	16	38.421		0.040032	16	3.62319
WBGene00009157		-0.056126	6	1.71024		-0.174468	6	2.48535		-0.988387	6	30.041		-1.10072	6	62.7234		-0.0259359	6	0.443413		-0.0654679	6	1.669
WBGene00009158		-0.0566239	13	3.40729		-0.486185	13	118.524		-0.610278	13	55.9432		-0.659877	13	120.864		-0.51589	13	16.5586		0.0208205	13	2.90101
WBGene00009160		0.368565	9	0.232789		0.423328	9	0.0601876		0.845762	9	0.0109423		-0.525645	9	14.1538		0.501496	9	0.0349355		1.00193	9	0.0284048
WBGene00009159		0.44913	9	0.150816		-0.059243	9	1.72139		0.647773	9	0.0297886		-0.190896	9	2.23764		0.83034	9	0.00671537		0.264749	9	0.64486
WBGene00009161		-0.675675	3	8.40135		-0.0187222	3	0.913703		-1.3801	3	20.7154		-2.11345	3	174.424		-1.6799	3	15.1235		-0.0409344	3	1.01458
WBGene00009162		-1.3908	26	1.14038e+08		-0.957636	26	1.58768e+07		-1.31938	26	1.4966e+07		-0.866523	26	191633		-0.156856	26	4.86412		-0.375751	26	848.721
WBGene00009165		0.0716719	2	0.823408		0.0160621	2	0.773834		-0.42888	2	1.51266		-0.0933071	2	0.73129		0.261053	2	0.235137		0.23627	2	0.554797
WBGene00009163		0.298321	19	0.226672		0.461219	19	0.00590159		-0.909912	19	5258.16		-0.320922	19	30.8545		-0.879281	19	2764.65		0.755115	19	0.01779
WBGene00006528		0.281655	13	0.324538		0.311333	13	0.0800459		-0.484358	13	23.9167		0.445134	13	0.0337944		-0.217776	13	2.12091		0.535905	13	0.153907
WBGene00000371		-1.25733	6	270.589		-0.780365	6	61.4967		-1.35926	6	122.543		-1.63353	6	554.299		-1.87868	6	353.348		0.276453	6	0.571033
WBGene00009164		0.333814	18	0.172082		0.547755	18	0.00258702		0.744543	18	0.00148412		0.437612	18	0.015388		-0.0853439	18	1.16388		-0.259469	18	43.1444
WBGene00003569		0.470677	18	0.0508722		0.0039679	18	1.68038		-0.13816	18	3.70166		-0.278006	18	16.7626		-0.460903	18	37.4356		-0.596124	18	544.791
WBGene00009408		0.244363	19	0.374292		0.0409436	19	1.11005		-0.558873	19	202.07		-0.276971	19	19.6674		-0.0551163	19	0.923823		0.0171298	19	6.05008
WBGene00013449		0.188853	4	0.606131		0.969772	4	0.0153505		-0.55747	4	3.40937		-0.244256	4	1.38721		0	4	0.386069		0.337134	4	0.470386
WBGene00003652		0.409424	21	0.0682357		-0.669568	21	17901.3		-0.379906	21	56.8066		-0.175561	21	8.87921		-0.780731	21	2312.15		0.253473	21	0.998086
WBGene00006978		-0.152495	10	4.41677		-0.544123	10	70.868		-1.3341	10	1225.09		-1.38283	10	3187.39		-0.914086	10	66.4519		-0.244632	10	6.91538
WBGene00010730		-0.188438	8	4.03		-0.257692	8	5.65096		-0.649939	8	15.4913		-1.18777	8	298.033		-0.983021	8	36.8258		-0.0223394	8	1.90379
WBGene00010731		-0.277963	31	440.556		-0.546463	31	111081		-0.70192	31	41121.2		-0.416141	31	1386.95		-0.257596	31	36.9204		-0.347157	31	2223.28
WBGene00010732		0.0151479	17	2.73892		-0.631916	17	2198.48		-1.08969	17	10344.3		-0.876789	17	3702.37		-0.121017	17	1.49499		0.340723	17	0.469145
WBGene00003639		-0.0581636	23	9.24727		-0.714047	23	79193		-0.875776	23	19412.7		-0.555746	23	1144.89		-1.73971	23	3.38167e+08		-0.116565	23	34.0549
WBGene00002142		0.434105	18	0.0704542		-0.312765	18	73.0522		-0.61466	18	252.419		-0.528434	18	193.726		0.219106	18	0.0698138		0.313384	18	0.576687
WBGene00003659		0.987129	8	0.0113251		-0.110567	8	2.20457		-0.61505	8	13.1779		-1.25949	8	427.719		-0.690925	8	9.7627		0.539838	8	0.216223
WBGene00003524		0.235245	7	0.492836		-0.24605	7	4.36409		-0.591784	7	8.88989		-0.84204	7	33.729		0	7	0.413007		0.730435	7	0.119236
WBGene00003842		0.114981	11	0.971319		-0.314863	11	15.85		-1.27265	11	1552.14		-0.556543	11	30.7191		0.376934	11	0.0478974		0.743379	11	0.0632832
WBGene00000640		0.523732	7	0.130487		0.310097	7	0.168936		0.602369	7	0.0580548		-1.194	7	168.07		-1.18089	7	50.8269		0.478018	7	0.288689
WBGene00003396		0.00895512	11	1.86825		-0.351021	11	21.2061		-0.268086	11	4.12507		-0.527323	11	25.4367		-0.298698	11	2.67552		0.0102385	11	2.41657
WBGene00009937		-0.283594	6	4.46194		-0.422348	6	9.23572		0.0259045	6	0.642525		-1.86145	6	1407.79		-1.12392	6	23.2407		-0.918905	6	24.2707
WBGene00009939		-0.650949	15	410.609		-0.378629	15	74.0387		-1.3178	15	21679		-0.654155	15	232.617		-0.649338	15	79.977		-0.545149	15	139.986
WBGene00009938		-0.871231	4	23.1047		-0.395448	4	4.70246		-1.00183	4	12.6224		-0.191727	4	1.17613		-0.0933855	4	0.495233		0.208895	4	0.640252
WBGene00009941		-0.0266383	4	1.2705		-0.120112	4	1.48221		-0.804451	4	7.05724		-0.400003	4	2.26306		-0.723084	4	2.6548		-0.347291	4	2.43823
WBGene00009942		0.123796	11	0.919907		-0.194468	11	6.01235		-1.13033	11	669.965		-1.27064	11	3090.49		0.463138	11	0.0286682		0.836557	11	0.0398326
WBGene00009940		-0.118839	3	1.54278		-0.0602213	3	1.06279		0.0488556	3	0.562935		-0.444132	3	2.02648		0	3	0.377486		0.0577052	3	0.829825
WBGene00013696		0.493262	6	0.16873		-0.396928	6	8.07251		-1.22421	6	73.444		-1.82279	6	1201.92		0	6	0.403825		1.0311	6	0.0535325
WBGene00013695		-0.105938	8	2.66846		-0.996748	8	639.212		0.0883918	8	0.505367		-1.08731	8	179.688		0.00652573	8	0.410053		-0.321037	8	6.04739
WBGene00013697		-0.0965577	3	1.44162		-0.339443	3	2.93832		-1.39979	3	21.7706		-0.314473	3	1.43371		0.00515054	3	0.373239		0.266638	3	0.542094
WBGene00013694		-0.805455	10	192.21		-0.286015	10	10.2261		-0.438478	10	9.04287		0.211714	10	0.228876		0.0962354	10	0.260632		-0.579929	10	32.3557
WBGene00005023		0.288985	15	0.286498		-0.076395	15	3.33625		-0.285354	15	8.53515		-0.169388	15	4.05829		-0.6456	15	77.6697		0.0537018	15	2.97071
WBGene00303082		-0.115456	2	1.35274		-1.00326	2	18.0693		-2.64972	2	160.615		-2.0775	2	56.9932		-1.24485	2	3.16882		-1.88876	2	19.3547
WBGene00011985		1.83759	17	5.00411e-07		0.389197	17	0.0201874		0.893965	17	0.00055587		0.447571	17	0.016601		0.486231	17	0.00726432		0.452624	17	0.210399
WBGene00011988		-0.10816	12	4.33111		-0.437951	12	57.0481		-0.193209	12	2.98146		-0.5557	12	41.3206		0.744859	12	0.00386135		0.359055	12	0.424458
WBGene00011986		0.394582	6	0.255779		0.98309	6	0.00540993		-1.43735	6	164.757		-1.09359	6	60.9215		-0.796928	6	7.14795		-0.683451	6	11.5965
WBGene00007043		0.0592003	6	1.05174		-0.0633401	6	1.37979		-0.357267	6	2.74602		-0.132032	6	1.19388		0.380883	6	0.102266		1.82463	6	0.00444222
WBGene00003397		-0.211116	14	11.6846		0.113081	14	0.484606		-0.932132	14	754.406		-1.47482	14	105466		1.49078	14	8.26239e-06		-0.126506	14	7.97705
WBGene00006633		-0.086345	9	2.70033		-0.100413	9	2.29155		-1.27595	9	501.296		-1.18172	9	525.919		0.0701012	9	0.303956		-0.0034712	9	2.00848
WBGene00011944		-0.0395453	9	2.0985		0.235043	9	0.222711		-0.645848	9	20.6957		-0.439763	9	8.81761		-0.108185	9	0.743197		0.601735	9	0.154726
WBGene00001226		0.570149	23	0.0100747		0.786511	23	2.19517e-05		0.0441158	23	0.801742		0.488401	23	0.00357724		-0.124841	23	2.51523		2.61196	23	2.72882e-10
WBGene00006379		0.281485	14	0.314081		0.0554045	14	0.848169		-0.7152	14	159.224		-0.0669258	14	1.60733		0.0173223	14	0.425513		-0.0183348	14	4.13823
WBGene00001941		-0.433742	2	3.14724		-1.10313	2	24.6044		-1.5291	2	15.2566		-1.65546	2	22.5657		-0.554801	2	0.962263		-0.323378	2	1.41387
WBGene00001942		-1.84005	2	131.286		-2.37646	2	1259.73		-3.19763	2	507.733		-3.57343	2	1520.7		-2.60995	2	33.4861		-1.65765	2	13.1527
WBGene00011945		0.286627	13	0.313513		-0.00324541	13	1.42535		-1.05207	13	1102.93		-0.584289	13	69.0599		-0.747948	13	81.9905		0.448422	13	0.253429
WBGene00000476		-0.00966311	10	1.93488		0.0068214	10	1.13724		-0.558079	10	17.4178		-0.313437	10	5.30076		-0.0357251	10	0.537456		0.46351	10	0.265767
WBGene00007274		0.956955	8	0.0131682		-0.413516	8	15.3141		2.178	8	3.13756e-05		1.02091	8	0.00439519		0.137983	8	0.225605		1.27117	8	0.0127621
WBGene00001483		0.404291	5	0.266479		1.04522	5	0.00659954		-0.484995	5	3.50324		-0.084196	5	0.907509		1.49469	5	0.00363596		-1.23159	5	36.3675
WBGene00008661		1.55302	9	0.00039395		0.0424867	9	0.848916		0.131108	9	0.406501		-0.341924	9	5.14295		-0.643978	9	10.9149		-0.624826	9	27.9176
WBGene00008662		0.0453376	5	1.05186		-0.110411	5	1.58729		-2.25117	5	1342.82		-2.32819	5	3032.78		-0.384944	5	1.32048		0.515171	5	0.287747
WBGene00008663		0.0290258	6	1.19441		-0.107962	6	1.74757		-0.294327	6	2.16315		-0.422789	6	3.92074		-0.025209	6	0.442253		0.0783131	6	1.06313
WBGene00003803		-0.0164305	15	3.03884		0.108713	15	0.499756		-1.15542	15	6317.48		-1.16321	15	16332		0.0851505	15	0.253751		-0.73555	15	476.515
WBGene00008665		-0.0892109	38	68.371		-0.411518	38	58097.1		-1.02617	38	1.15374e+08		-0.950582	38	2.11636e+08		0.0318221	38	0.458251		0.192117	38	4.30989
WBGene00003564		0.0375119	6	1.15244		0.386632	6	0.127335		-1.88007	6	882.443		-1.344	6	169.63		0.333231	6	0.121438		0.741235	6	0.13289
WBGene00008664		0.363383	5	0.311616		0.196598	5	0.36989		-0.741219	5	8.30373		-1.23817	5	58.8927		1.00541	5	0.0168667		1.27942	5	0.0346308
WBGene00008667		-0.173445	10	4.98518		0.156301	10	0.370638		-0.777226	10	57.8937		-0.944548	10	231.441		0.6592	10	0.0118879		-0.490005	10	21.3907
WBGene00008666		-0.229454	24	70.0952		-0.373371	24	690.619		-0.489184	24	355.578		-0.77351	24	24145.5		-0.204833	24	7.15762		0.649961	24	0.0232231
WBGene00007156		0.0559667	5	1.00995		-0.847892	5	52.5064		0.299323	5	0.24956		-0.687114	5	8.02931		-1.66224	5	72.5169		0.229964	5	0.634122
WBGene00007159		0.965361	7	0.0170632		-0.162122	7	2.67167		-1.63354	7	716.307		-1.35682	7	353.319		-1.51209	7	196.025		0.334686	7	0.476971
WBGene00007155		0.254601	7	0.450795		-0.592721	7	33.1255		-0.0219553	7	0.805796		-0.344033	7	3.476		-0.157383	7	0.784369		0.399482	7	0.380112
WBGene00003508		0.707132	32	0.000375531		0.470316	32	0.000339612		0.257968	32	0.0396679		1.00364	32	1.35125e-07		-0.894036	32	1.00343e+06		0.902609	32	0.000384385
WBGene00007054		-0.058575	36	33.6128		-0.238122	36	760.731		-1.07303	36	9.76291e+07		-0.891989	36	2.72475e+07		-0.491197	36	4721.51		-0.189213	36	843.698
WBGene00007158		-0.0187723	1	0.962962		-0.19566	1	1.27362		-0.248058	1	0.89897		-0.18461	1	0.787656		-0.145542	1	0.433368		-0.080382	1	0.80689
WBGene00013698		-0.236427	6	3.65735		-0.725102	6	45.894		-0.91528	6	22.7698		-1.14627	6	75.5655		-0.140152	6	0.669376		0.0537714	6	1.1482
WBGene00013699		0.168008	4	0.651116		-0.873973	4	34.9757		-1.45103	4	47.4017		-1.61584	4	103.277		-0.474839	4	1.36947		1.23728	4	0.0540252
WBGene00013700		0.889355	18	0.00122302		-0.431569	18	300.693		-0.146191	18	3.97467		0.233094	18	0.113547		-0.171433	18	2.57894		1.42216	18	0.00013608
WBGene00013701		-0.0219469	5	1.3606		0.000911483	5	0.936006		-0.0907682	5	0.928533		-0.0596097	5	0.830311		-0.0367894	5	0.443136		-0.00819967	5	1.22668
WBGene00013704		0.0188823	1	0.88433		-0.0107712	1	0.796355		-0.680394	1	1.85706		-0.0897183	1	0.668934		0.019309	1	0.352231		0.0161691	1	0.711351
WBGene00013702		0.606608	6	0.104634		0.0572397	6	0.728614		-1.56627	6	268.581		-0.527269	6	6.0108		0.0572894	6	0.328457		0.940763	6	0.0710689
WBGene00014965		1.0755	19	0.000165245		1.27747	19	2.25788e-07		-0.543938	19	175.91		-0.407441	19	74.8703		-0.672158	19	369.884		0.972911	19	0.00318456
WBGene00013703		-0.281563	30	384.648		-0.138733	30	41.0951		-1.00001	30	1.87628e+06		-1.44304	30	8.55755e+09		-0.561403	30	2937.44		0.483758	30	0.0856911
WBGene00008885		0.168727	7	0.669539		-0.539695	7	24.2951		-0.874587	7	29.2664		-0.538761	7	8.45246		0	7	0.413007		0.506169	7	0.261579
WBGene00008886		0.165423	10	0.703488		0.0175215	10	1.04954		-0.124752	10	1.6201		-0.467665	10	13.3395		0	10	0.441824		0.423588	10	0.319367
WBGene00023415		0.607877	12	0.0395035		0.680787	12	0.00377208		-0.829592	12	167.02		-0.534069	12	35.5678		0.146279	12	0.180586		0.829165	12	0.0345687
WBGene00044243		0.694871	5	0.0876904		0.393299	5	0.145471		-0.0248911	5	0.74376		0.461982	5	0.12593		-0.00912739	5	0.406313		1.51884	5	0.01784
WBGene00006447		0.707513	9	0.0374844		0.526208	9	0.0294457		-0.560564	9	13.444		0.0868243	9	0.484375		-0.100876	9	0.716451		1.29467	9	0.00822016
WBGene00007705		0.126208	4	0.751628		1.00385	4	0.0133066		-0.782087	4	6.60732		-0.475012	4	2.8646		-0.792441	4	3.19412		-0.389688	4	2.69986
WBGene00001442		0.0868085	5	0.897563		1.185	5	0.00340012		-0.732732	5	8.06971		-0.0961638	5	0.947645		-0.411596	5	1.4356		-0.335248	5	3.03555
WBGene00045383		0.300955	13	0.283796		-0.0609932	13	2.4182		-0.997725	13	764.332		-0.846805	13	482.406		-1.00942	13	497.224		-0.520881	13	63.6416
WBGene00007707		1.04091	7	0.0120483		-0.904857	7	205.467		-0.568862	7	8.0715		-1.4952	7	664.346		2.33935	7	2.98788e-05		-0.328883	7	4.87559
WBGene00077526		1.59065	4	0.00491777		-1.88499	4	2426.22		-1.13397	4	18.6289		-1.5239	4	77.3619		-0.0570389	4	0.449489		1.61147	4	0.0219734
WBGene00007708		2.15786	1	0.00700039		-2.69908	1	735.019		-1.97952	1	16.429		-2.36569	1	33.6664		-0.122015	1	0.420735		1.74705	1	0.0742876
WBGene00303030		0.144647	5	0.719422		0.732079	5	0.0291562		2.60197	5	0.000106876		2.22759	5	0.000212523		0.486211	5	0.0859406		0.989616	5	0.0772961
WBGene00002153		1.01516	27	2.22789e-05		1.11103	27	1.97108e-08		1.38449	27	3.64617e-08		0.742844	27	4.65823e-05		-0.528491	27	799.142		1.01303	27	0.000324629
WBGene00007709		1.40146	4	0.0094176		0.718246	4	0.0440734		-0.828488	4	7.57505		0.0217852	4	0.601264		0.784175	4	0.0477036		-0.505532	4	3.56694
WBGene00007710		-0.0240994	6	1.49424		-0.163173	6	2.34105		-0.31157	6	2.30926		-1.08227	6	58.1638		-1.42669	6	69.246		0.611959	6	0.199345
WBGene00000931		-0.0465314	6	1.64244		0.186454	6	0.367558		-0.295173	6	2.1701		-0.660398	6	10.3605		-0.238751	6	0.955162		0.301204	6	0.528376
WBGene00007711		0.73879	10	0.0256055		-0.623279	10	128.318		-2.33545	10	296269		-1.76658	10	31674.6		-0.43141	10	4.70785		0.0535121	10	1.75362
WBGene00007712		0.0945652	5	0.871324		-0.792535	5	40.3786		0.00949457	5	0.662421		-0.644873	5	6.89195		-0.430553	5	1.52354		0.981728	5	0.0790039
WBGene00000095		-0.0918341	8	2.48687		-0.520371	8	30.3385		-0.959355	8	65.0185		-0.86848	8	59.6834		-1.17545	8	88.3076		0.77372	8	0.0874727
WBGene00007713		-0.168203	1	1.35027		-0.647651	1	4.01403		-1.76998	1	11.5584		-3.22546	1	147.936		-2.34351	1	6.87429		-2.55992	1	20.5288
WBGene00013705		0.282474	8	0.3831		-0.145704	8	2.76029		-1.72993	8	2314.38		-0.909166	8	73.2573		-0.0652347	8	0.568187		-0.27269	8	5.01559
WBGene00219498		-0.239071	2	1.87776		-0.127064	2	1.20441		-1.24698	2	8.43494		-0.838901	2	3.75785		0	2	0.369094		0	2	0.823481
WBGene00013708		0.3923	4	0.301386		-0.825931	4	28.5941		-1.43687	4	45.4662		-0.899571	4	10.8762		-0.752173	4	2.86892		-0.200421	4	1.71287
WBGene00000426		-0.294197	10	10.0166		-0.137489	10	3.35671		-1.20584	10	606.54		-0.742069	10	68.9046		0.939797	10	0.00255123		-0.26538	10	7.60823
WBGene00013709		-0.36016	12	22.6224		-0.933869	12	4064.59		-1.06942	12	761.464		-0.9248	12	533.57		-0.432849	12	7.45347		0.603635	12	0.115131
WBGene00003000		-0.175021	17	13.8263		-0.341976	17	81.6354		-0.808587	17	964.989		-0.674013	17	561.8		-0.0346758	17	0.700976		0.116764	17	2.33518
WBGene00013860		-0.0765564	13	3.91362		0.0172251	13	1.18179		-0.301468	13	6.9612		-0.793514	13	325.12		-0.537253	13	19.1858		0.200482	13	1.04166
WBGene00013859		0.834233	82	2.26384e-10		0.409121	82	1.60387e-07		0.205713	82	0.00663844		0.173907	82	0.0124325		0.245102	82	0.000146171		0.523646	82	0.00167295
WBGene00007047		0.287877	18	0.259047		-0.188769	18	16.6838		-1.30309	18	112571		-1.19523	18	130962		0.0812955	18	0.249498		0.511247	18	0.129918
WBGene00011864		0	2	0.995846		-0.230647	2	1.6589		-0.545128	2	1.93104		-0.122293	2	0.779337		0	2	0.369094		0	2	0.823481
WBGene00013711		0.248	89	0.0840824		-0.00497669	89	70.149		-0.590529	89	1.27233e+11		-0.504578	89	5.61264e+10		-0.265817	89	215343		0.374403	89	0.156715
WBGene00013713		1.3369	11	0.000517001		0.585316	11	0.011282		0.284688	11	0.157843		0.690021	11	0.00980651		1.25094	11	0.000263176		1.49378	11	0.00152105
WBGene00013712		1.89886	4	0.00170633		-0.328126	4	3.54589		-0.347226	4	1.83532		-0.615454	4	4.45379		0.0671655	4	0.322763		2.25633	4	0.00466223
WBGene00013710		-0.247877	6	3.83823		-0.888932	6	109.28		-0.271631	6	1.98482		-0.24598	6	1.90258		-0.951846	6	12.4963		-1.62817	6	224.544
WBGene00004476		0.875727	4	0.0572906		-0.62917	4	12.5302		-1.60451	4	74.4973		-2.12763	4	515.762		1.49736	4	0.00712273		0.283789	4	0.534753
WBGene00013892		0.301046	7	0.363967		-0.0859513	7	1.71147		-0.861494	7	27.6956		-1.31655	7	294.006		-0.550325	7	3.89061		0.348586	7	0.454301
WBGene00220261		1.96094	4	0.00137869		0.686475	4	0.0503542		0.0160341	4	0.6295		-1.08437	4	19.4394		1.0029	4	0.0266232		0.214556	4	0.631597
WBGene00013891		0.833912	5	0.0515203		0.110709	5	0.555962		0.589608	5	0.0938745		0.502325	5	0.108836		1.20285	5	0.00908079		0.533557	5	0.273457
WBGene00001337		0.901412	25	0.000158972		0.454584	25	0.00190498		0.265927	25	0.0603047		0.023324	25	1.07082		1.57503	25	1.664e-09		1.61986	25	1.15881e-06
WBGene00000148		-0.141206	10	4.13785		0.165686	10	0.345444		0.22588	10	0.237099		0.199842	10	0.245727		0.18666	10	0.158725		0.116376	10	1.31309
WBGene00013893		0.761482	11	0.0179971		0.21236	11	0.227247		0.0386086	11	0.674721		0.454571	11	0.0448554		0.751705	11	0.00514283		0.3384	11	0.473281
WBGene00013894		1.29775	11	0.000658255		0.697996	11	0.0045539		0.422571	11	0.0699389		0.773159	11	0.00573273		-0.650787	11	21.7702		2.35315	11	2.12743e-05
WBGene00013895		0.465163	20	0.0432513		0.402554	20	0.0103054		0.455957	20	0.0139872		-0.0649418	20	2.40134		-0.737754	20	1011.51		-0.218758	20	47.88
WBGene00009743		0.228147	11	0.483236		0.0433604	11	0.886003		-1.09661	11	549.04		-0.54611	11	28.7177		-0.00260795	11	0.458942		0.499767	11	0.212292
WBGene00003587		0	3	1.07453		-0.612345	3	7.93884		-1.80291	3	60.2009		-1.97891	3	121.805		-0.433758	3	0.978901		0.179227	3	0.647792
WBGene00009744		0.206507	10	0.554821		-0.0362464	10	1.57085		-1.6122	10	5624.9		-1.21484	10	1166.46		0.0592054	10	0.319322		0.124558	10	1.26457
WBGene00189958		0.234127	5	0.510904		0.0351509	5	0.795664		-0.105617	5	0.976153		-0.354342	5	2.41041		0.0948089	5	0.29329		-1.88911	5	224.828
WBGene00303028		0.374118	1	0.395918		1.4114	1	0.0215014		0.648058	1	0.199834		-0.522896	1	1.41021		0.402367	1	0.217585		-3.09578	1	41.3164
WBGene00009745		-0.836319	5	30.6593		-0.417189	5	6.80396		-0.729384	5	7.97924		-1.1203	5	38.4554		0.344678	5	0.133958		-0.875558	5	13.5625
WBGene00077521		0.299658	9	0.337443		-0.71825	9	167.775		-0.123214	9	1.47149		0.223802	9	0.227711		-1.87026	9	5113.94		0.286824	9	0.587296
WBGene00003233		0.20044	27	0.552892		0.433527	27	0.00181344		-0.0765294	27	3.95587		-0.334255	27	171.11		0.0229893	27	0.475078		0.951239	27	0.000633863
WBGene00000843		-0.408896	6	7.56722		-0.960117	6	159.314		-1.25064	6	81.1812		-1.25548	6	118.111		-0.488657	6	2.35196		-0.267237	6	3.14285
WBGene00009112		0.967095	7	0.0169275		-1.13371	7	783.136		-1.1052	7	77.328		-0.942166	7	53.2635		-0.579853	7	4.38815		0.999645	7	0.0464345
[truncated: 18,182 more rows]

## Sheet: S2-All_genes_FDR
Supplementary table 4, Sheet 2. Tissue-specific gene calling ordered by FDR.
Muscle				Intestine				Y cell
BC_10		BC_11		BC_05		BC_12		BC_01		BC_04
name	FDR	name	FDR	name	FDR	name	FDR	name	FDR	name	FDR
WBGene00018468	7.82999e-71	WBGene00018468	7.1425e-41	WBGene00018468	1.31371e-107	WBGene00018468	3.14802e-108	WBGene00018468	1.39043e-85	WBGene00018468	1.3622e-57
WBGene00006759	1.89613e-34	WBGene00012387	4.15827e-31	WBGene00012387	5.06506e-47	WBGene00012387	3.53802e-45	WBGene00012387	2.67024e-34	WBGene00012387	9.21716e-27
WBGene00012387	6.03095e-30	WBGene00013440	5.64349e-29	WBGene00021186	2.74295e-40	WBGene00021186	1.8962e-39	WBGene00003734	8.99438e-25	WBGene00002915	4.32036e-22
WBGene00002915	1.24022e-27	WBGene00006759	1.52318e-24	WBGene00006759	4.44115e-34	WBGene00006759	9.69096e-31	WBGene00000106	5.91642e-20	WBGene00011522	5.93969e-22
WBGene00011522	1.37521e-27	WBGene00007372	5.42337e-22	WBGene00004130	1.76076e-27	WBGene00004130	5.83549e-27	WBGene00013138	9.44987e-20	WBGene00000962	1.51552e-21
WBGene00001414	1.33106e-21	WBGene00002915	1.88142e-21	WBGene00011522	3.29416e-24	WBGene00002915	1.41523e-26	WBGene00000998	1.75029e-19	WBGene00003515	1.48228e-20
WBGene00003734	3.56104e-20	WBGene00011522	2.69543e-20	WBGene00002915	1.76823e-23	WBGene00011522	1.55645e-26	WBGene00015595	8.64208e-19	WBGene00003071	7.29389e-20
WBGene00000998	5.93951e-20	WBGene00022069	2.17292e-19	WBGene00008396	3.26385e-23	WBGene00007028	3.19618e-23	WBGene00001414	1.22678e-18	WBGene00001414	4.74326e-19
WBGene00011456	1.5043e-18	WBGene00001414	6.27801e-19	WBGene00022069	4.82203e-20	WBGene00008396	1.97121e-22	WBGene00013440	1.03246e-17	WBGene00008396	1.98975e-18
WBGene00015595	2.3414e-17	WBGene00003734	1.81241e-18	WBGene00004076	1.22184e-19	WBGene00022069	4.90104e-22	WBGene00002915	2.86289e-17	WBGene00000998	3.74919e-17
WBGene00002348	6.65849e-17	WBGene00022816	1.35141e-17	WBGene00019435	9.06483e-19	WBGene00235287	9.91418e-20	WBGene00011456	6.30303e-17	WBGene00018547	1.58264e-15
WBGene00013440	8.06738e-17	WBGene00011456	3.84209e-17	WBGene00003734	9.86372e-19	WBGene00004076	1.07055e-19	WBGene00013549	1.42584e-16	WBGene00011456	2.14041e-15
WBGene00003071	7.0316e-16	WBGene00000106	7.55452e-17	WBGene00007028	3.38195e-18	WBGene00015595	2.16731e-19	WBGene00002348	5.07975e-16	WBGene00003734	2.20236e-15
WBGene00000962	1.66178e-15	WBGene00013138	8.73354e-17	WBGene00001414	1.13018e-17	WBGene00003734	1.07464e-18	WBGene00004855	1.89358e-15	WBGene00000031	1.75072e-14
WBGene00009460	5.35581e-15	WBGene00019435	4.45842e-16	WBGene00012896	2.81579e-17	WBGene00021290	1.11546e-18	WBGene00206362	1.9838e-15	WBGene00004313	8.32765e-14
WBGene00004855	1.58025e-14	WBGene00002348	1.34364e-15	WBGene00015595	2.59844e-16	WBGene00001414	9.07187e-18	WBGene00011522	4.86009e-15	WBGene00002348	1.07547e-13
WBGene00012395	1.61419e-14	WBGene00022090	2.00159e-15	WBGene00003154	3.33538e-16	WBGene00011456	1.2894e-17	WBGene00003485	6.18652e-15	WBGene00006789	1.95602e-13
WBGene00010070	2.07408e-14	WBGene00006930	5.03062e-15	WBGene00011456	4.85656e-16	WBGene00004855	5.03653e-16	WBGene00003515	1.23715e-14	WBGene00006759	1.96905e-13
WBGene00003515	5.27973e-14	WBGene00008396	1.12716e-14	WBGene00021011	1.34775e-15	WBGene00019043	9.32981e-16	WBGene00006759	1.41752e-14	WBGene00018154	3.3699e-13
WBGene00003072	8.05516e-14	WBGene00015595	5.07984e-14	WBGene00021605	1.63165e-15	WBGene00011523	3.41493e-15	WBGene00011212	4.58527e-14	WBGene00018237	1.03487e-12
WBGene00000031	1.11033e-13	WBGene00000962	7.19044e-14	WBGene00019146	3.40436e-15	WBGene00019531	3.60599e-15	WBGene00003777	1.10412e-12	WBGene00015371	1.06714e-12
WBGene00015102	1.35766e-13	WBGene00008448	1.03879e-13	WBGene00019531	4.75853e-15	WBGene00016405	4.72169e-15	WBGene00012491	1.29471e-12	WBGene00013440	1.32672e-12
WBGene00011523	1.54606e-13	WBGene00003515	1.49817e-13	WBGene00021290	5.57165e-15	WBGene00021011	8.72518e-15	WBGene00044200	1.34004e-12	WBGene00018672	1.94482e-12
WBGene00018672	2.49538e-13	WBGene00009968	2.3629e-13	WBGene00004855	5.7073e-15	WBGene00006780	2.17717e-14	WBGene00010769	1.69669e-12	WBGene00013138	3.99832e-12
WBGene00019064	3.11469e-13	WBGene00006926	7.41549e-13	WBGene00044149	3.54775e-14	WBGene00012896	3.89572e-14	WBGene00012109	1.94633e-12	WBGene00003796	4.09547e-12
WBGene00013138	6.12835e-13	WBGene00003156	1.15408e-12	WBGene00006780	7.66166e-14	WBGene00013509	4.88083e-14	WBGene00021186	3.06118e-12	WBGene00006926	4.64462e-12
WBGene00015371	2.54553e-12	WBGene00012186	1.2009e-12	WBGene00012395	8.71935e-14	WBGene00006930	1.08339e-13	WBGene00010067	1.55578e-11	WBGene00016558	6.04966e-12
WBGene00020576	3.35989e-12	WBGene00001541	1.27808e-12	WBGene00235287	1.12772e-13	WBGene00021605	1.76935e-13	WBGene00021711	2.61877e-11	WBGene00015595	6.35085e-12
WBGene00011436	3.39689e-12	WBGene00019064	1.85618e-12	WBGene00004951	3.83842e-13	WBGene00018900	2.14704e-13	WBGene00023425	3.0733e-11	WBGene00022816	1.05045e-11
WBGene00004728	4.66131e-12	WBGene00019043	2.27288e-12	WBGene00019273	3.8579e-13	WBGene00001187	3.35816e-13	WBGene00006727	4.85848e-11	WBGene00011523	1.14671e-11
WBGene00008448	5.16944e-12	WBGene00013549	2.27736e-12	WBGene00019043	6.83635e-13	WBGene00003154	3.47312e-13	WBGene00003801	5.28846e-11	WBGene00018783	1.43834e-11
WBGene00016405	7.81401e-12	WBGene00235287	2.36033e-12	WBGene00006803	1.25101e-12	WBGene00000551	3.59521e-13	WBGene00020326	6.02762e-11	WBGene00015102	1.76811e-11
WBGene00001538	7.92037e-12	WBGene00018193	2.96653e-12	WBGene00003086	1.57049e-12	WBGene00010280	9.2382e-13	WBGene00019070	6.69324e-11	WBGene00015061	2.21309e-11
WBGene00003497	8.19088e-12	WBGene00013011	3.29633e-12	WBGene00013549	1.94814e-12	WBGene00019435	1.56089e-12	WBGene00006616	8.14276e-11	WBGene00013672	2.49103e-11
WBGene00022069	1.61484e-11	WBGene00016405	6.47404e-12	WBGene00011523	2.08054e-12	WBGene00003086	2.35093e-12	WBGene00008448	1.22116e-10	WBGene00010314	2.84745e-11
WBGene00007372	2.01756e-11	WBGene00011629	8.49086e-12	WBGene00006930	2.22408e-12	WBGene00003515	4.34445e-12	WBGene00001538	1.61618e-10	WBGene00011530	2.99717e-11
WBGene00013011	2.15491e-11	WBGene00018196	9.08091e-12	WBGene00006814	2.25172e-12	WBGene00020696	4.7933e-12	WBGene00001833	1.67974e-10	WBGene00009035	3.27384e-11
WBGene00019043	2.18671e-11	WBGene00012896	1.15604e-11	WBGene00006727	2.32009e-12	WBGene00006803	5.02521e-12	WBGene00004076	2.26714e-10	WBGene00004076	4.16906e-11
WBGene00006930	2.25159e-11	WBGene00018783	1.35502e-11	WBGene00019819	2.8136e-12	WBGene00002228	5.41656e-12	WBGene00006067	2.4341e-10	WBGene00022069	5.41938e-11
WBGene00006801	2.44507e-11	WBGene00009460	1.53779e-11	WBGene00000551	3.04866e-12	WBGene00019819	6.49243e-12	WBGene00010673	2.58659e-10	WBGene00004747	6.29383e-11
WBGene00006436	2.51943e-11	WBGene00019994	2.33826e-11	WBGene00010280	4.49143e-12	WBGene00002005	6.71159e-12	WBGene00002173	3.04046e-10	WBGene00011629	8.65881e-11
WBGene00013771	3.30674e-11	WBGene00021986	3.43275e-11	WBGene00002228	4.81113e-12	WBGene00021303	8.3935e-12	WBGene00018039	3.19178e-10	WBGene00009968	1.52976e-10
WBGene00001328	3.60347e-11	WBGene00003086	3.87393e-11	WBGene00018547	5.871e-12	WBGene00018783	8.46212e-12	WBGene00019617	3.24848e-10	WBGene00004259	1.97655e-10
WBGene00018547	5.51015e-11	WBGene00021711	3.89562e-11	WBGene00001186	9.27832e-12	WBGene00016565	8.59061e-12	WBGene00019064	4.04472e-10	WBGene00009460	1.98174e-10
WBGene00015841	6.65933e-11	WBGene00018024	4.04715e-11	WBGene00018783	1.19332e-11	WBGene00006727	9.29705e-12	WBGene00008396	8.34763e-10	WBGene00001226	2.72882e-10
WBGene00014179	6.94867e-11	WBGene00000998	4.90374e-11	WBGene00014179	1.27545e-11	WBGene00013138	9.32648e-12	WBGene00008423	9.04856e-10	WBGene00012395	3.98287e-10
WBGene00007248	8.81362e-11	WBGene00020254	5.06839e-11	WBGene00016405	1.30002e-11	WBGene00012395	1.02814e-11	WBGene00010876	9.4229e-10	WBGene00009365	4.03187e-10
WBGene00012186	1.17825e-10	WBGene00020576	7.28416e-11	WBGene00020696	1.35495e-11	WBGene00018547	1.3334e-11	WBGene00004747	9.96993e-10	WBGene00013509	4.23506e-10
WBGene00018237	1.24068e-10	WBGene00004210	1.00007e-10	WBGene00018672	1.41465e-11	WBGene00013549	1.3621e-11	WBGene00003884	1.13742e-09	WBGene00007672	5.14946e-10
WBGene00007414	1.64033e-10	WBGene00006803	1.53995e-10	WBGene00008033	1.43317e-11	WBGene00000224	1.44199e-11	WBGene00003037	1.3643e-09	WBGene00019043	9.10388e-10
WBGene00021605	1.65117e-10	WBGene00009865	1.57831e-10	WBGene00004265	1.85988e-11	WBGene00004265	1.64465e-11	WBGene00012395	1.65807e-09	WBGene00007248	1.24916e-09
WBGene00009035	1.7414e-10	WBGene00019273	2.04353e-10	WBGene00003515	1.90046e-11	WBGene00018898	2.33034e-11	WBGene00001337	1.664e-09	WBGene00008743	1.56071e-09
WBGene00019435	1.81606e-10	WBGene00013509	2.09243e-10	WBGene00001187	1.9667e-11	WBGene00044149	2.50338e-11	WBGene00022816	2.01937e-09	WBGene00022090	1.96823e-09
WBGene00018783	1.85603e-10	WBGene00004945	2.88421e-10	WBGene00013509	3.49143e-11	WBGene00004951	3.54438e-11	WBGene00022413	2.63592e-09	WBGene00021175	3.1673e-09
WBGene00010988	2.12638e-10	WBGene00003068	4.10605e-10	WBGene00021303	3.49262e-11	WBGene00008448	5.32084e-11	WBGene00009968	2.72746e-09	WBGene00010013	3.71463e-09
WBGene00013859	2.26384e-10	WBGene00004264	5.20281e-10	WBGene00007354	4.01967e-11	WBGene00021175	5.76661e-11	WBGene00007292	2.77013e-09	WBGene00000106	4.06188e-09
WBGene00003410	3.0549e-10	WBGene00009489	6.67776e-10	WBGene00021175	6.80849e-11	WBGene00021607	7.55569e-11	WBGene00011910	3.05681e-09	WBGene00001538	4.49274e-09
WBGene00021175	3.83071e-10	WBGene00003936	6.73053e-10	WBGene00021034	1.2412e-10	WBGene00002348	8.50523e-11	WBGene00004755	4.54931e-09	WBGene00006941	5.08039e-09
WBGene00009770	3.97496e-10	WBGene00044149	6.93885e-10	WBGene00018898	2.42815e-10	WBGene00013475	1.41273e-10	WBGene00003530	6.62796e-09	WBGene00018472	5.09731e-09
WBGene00012809	4.40369e-10	WBGene00004187	7.75655e-10	WBGene00013138	2.70507e-10	WBGene00014179	1.50348e-10	WBGene00021175	6.88672e-09	WBGene00019600	5.09805e-09
WBGene00001541	4.49527e-10	WBGene00017988	1.30527e-09	WBGene00019530	3.02017e-10	WBGene00012253	1.58711e-10	WBGene00010070	6.99829e-09	WBGene00019064	6.18445e-09
WBGene00012896	4.73952e-10	WBGene00013944	1.31434e-09	WBGene00022090	3.10771e-10	WBGene00019530	1.85917e-10	WBGene00003798	7.64696e-09	WBGene00017920	6.83187e-09
WBGene00008396	5.2822e-10	WBGene00018933	1.32565e-09	WBGene00002005	6.51084e-10	WBGene00019151	2.3907e-10	WBGene00013932	7.78857e-09	WBGene00020576	7.50816e-09
WBGene00000106	6.04542e-10	WBGene00006416	1.32857e-09	WBGene00020463	7.15127e-10	WBGene00008033	2.63722e-10	WBGene00005776	1.17381e-08	WBGene00019617	9.70213e-09
WBGene00004076	6.31532e-10	WBGene00013771	1.35237e-09	WBGene00016565	7.21624e-10	WBGene00009035	3.14656e-10	WBGene00009259	1.2991e-08	WBGene00219319	1.24548e-08
WBGene00009968	6.98694e-10	WBGene00000031	1.3916e-09	WBGene00008422	8.92681e-10	WBGene00018350	3.75107e-10	WBGene00010144	1.66572e-08	WBGene00009500	1.28808e-08
WBGene00013498	7.32636e-10	WBGene00000396	1.5487e-09	WBGene00009035	9.20282e-10	WBGene00013999	4.81896e-10	WBGene00020240	1.81143e-08	WBGene00003958	1.33902e-08
WBGene00019273	7.42944e-10	WBGene00003514	1.57503e-09	WBGene00015481	9.52122e-10	WBGene00012791	4.82797e-10	WBGene00007053	1.87284e-08	WBGene00016242	1.56399e-08
WBGene00011980	7.95711e-10	WBGene00009259	1.60238e-09	WBGene00021986	1.47185e-09	WBGene00009578	6.90844e-10	WBGene00007247	2.06546e-08	WBGene00006437	1.70544e-08
WBGene00006926	1.13836e-09	WBGene00007247	1.69149e-09	WBGene00003791	1.50675e-09	WBGene00007354	7.32722e-10	WBGene00018954	2.28778e-08	WBGene00004951	1.71457e-08
WBGene00006789	1.17222e-09	WBGene00018898	1.88552e-09	WBGene00022508	1.57403e-09	WBGene00019273	1.15197e-09	WBGene00011965	2.68374e-08	WBGene00206362	1.78946e-08
WBGene00000022	1.28581e-09	WBGene00004076	2.07426e-09	WBGene00006375	2.27366e-09	WBGene00005015	1.16129e-09	WBGene00016421	2.85512e-08	WBGene00016995	1.91555e-08
WBGene00000081	1.33244e-09	WBGene00012194	2.11674e-09	WBGene00002348	2.31462e-09	WBGene00003791	1.22521e-09	WBGene00010047	3.13946e-08	WBGene00001263	1.91977e-08
WBGene00018193	1.36054e-09	WBGene00006464	2.5488e-09	WBGene00018350	3.07169e-09	WBGene00022508	1.34681e-09	WBGene00015028	4.03073e-08	WBGene00019819	2.08885e-08
WBGene00001700	1.69739e-09	WBGene00001543	2.78818e-09	WBGene00018020	3.56918e-09	WBGene00004959	1.52096e-09	WBGene00018104	4.07411e-08	WBGene00000551	2.38552e-08
WBGene00018196	1.70446e-09	WBGene00010768	2.89465e-09	WBGene00019600	4.1893e-09	WBGene00015481	2.05614e-09	WBGene00235287	4.11266e-08	WBGene00013498	2.58789e-08
WBGene00018898	1.84906e-09	WBGene00012595	3.17737e-09	WBGene00008448	5.65636e-09	WBGene00001328	2.49521e-09	WBGene00004959	4.41871e-08	WBGene00013475	2.67813e-08
WBGene00008422	2.36113e-09	WBGene00020262	3.41055e-09	WBGene00023513	5.71867e-09	WBGene00011099	2.80103e-09	WBGene00020696	4.84249e-08	WBGene00004053	2.68056e-08
WBGene00021471	2.37709e-09	WBGene00018438	4.00053e-09	WBGene00019151	6.58608e-09	WBGene00004738	3.80245e-09	WBGene00021471	6.10955e-08	WBGene00000140	2.6888e-08
WBGene00012102	2.47426e-09	WBGene00010524	4.7204e-09	WBGene00007248	6.76825e-09	WBGene00003156	4.40742e-09	WBGene00006734	6.36676e-08	WBGene00007479	2.72917e-08
WBGene00019509	2.52315e-09	WBGene00021873	5.3735e-09	WBGene00010056	8.15494e-09	WBGene00022880	4.55624e-09	WBGene00016580	6.37617e-08	WBGene00017816	3.08546e-08
WBGene00012272	2.98161e-09	WBGene00012102	6.18401e-09	WBGene00001328	8.57546e-09	WBGene00009865	4.61386e-09	WBGene00011382	6.46473e-08	WBGene00018900	3.14571e-08
WBGene00020326	3.03674e-09	WBGene00015841	6.41584e-09	WBGene00019313	8.62555e-09	WBGene00000022	6.97228e-09	WBGene00008220	6.70917e-08	WBGene00012115	3.19958e-08
WBGene00006803	3.23938e-09	WBGene00021213	7.69365e-09	WBGene00017555	1.07627e-08	WBGene00001548	7.80032e-09	WBGene00003514	6.96874e-08	WBGene00010070	3.3649e-08
WBGene00019617	3.40375e-09	WBGene00017937	8.14123e-09	WBGene00015306	1.09895e-08	WBGene00010351	7.98906e-09	WBGene00012193	8.15835e-08	WBGene00007329	3.48091e-08
WBGene00018073	3.91995e-09	WBGene00015911	8.30764e-09	WBGene00013311	1.15426e-08	WBGene00007013	9.2689e-09	WBGene00004209	8.249e-08	WBGene00009658	3.71235e-08
WBGene00003155	4.127e-09	WBGene00020463	8.59598e-09	WBGene00013999	1.16741e-08	WBGene00003884	9.74503e-09	WBGene00007093	8.75757e-08	WBGene00010478	4.0143e-08
WBGene00016970	4.18467e-09	WBGene00020858	8.71411e-09	WBGene00017606	1.2979e-08	WBGene00012768	9.91179e-09	WBGene00206487	8.84714e-08	WBGene00021146	4.37677e-08
WBGene00022739	4.24912e-09	WBGene00022500	8.86293e-09	WBGene00018900	1.43912e-08	WBGene00015371	1.21636e-08	WBGene00022711	8.98282e-08	WBGene00004182	4.59866e-08
WBGene00017800	5.26018e-09	WBGene00000081	9.30308e-09	WBGene00022880	1.52568e-08	WBGene00001829	1.2762e-08	WBGene00010524	9.05391e-08	WBGene00003485	4.72062e-08
WBGene00022090	6.19642e-09	WBGene00001569	1.18991e-08	WBGene00009038	1.58098e-08	WBGene00019146	1.29533e-08	WBGene00011432	9.25158e-08	WBGene00003242	5.57497e-08
WBGene00006929	6.19882e-09	WBGene00003777	1.24126e-08	WBGene00001538	1.59532e-08	WBGene00044989	1.38611e-08	WBGene00000906	9.25674e-08	WBGene00016250	5.63445e-08
WBGene00010263	6.25376e-09	WBGene00012500	1.26387e-08	WBGene00000224	1.663e-08	WBGene00004091	1.50852e-08	WBGene00008854	9.64445e-08	WBGene00018024	5.86793e-08
WBGene00011530	6.67325e-09	WBGene00012131	1.26488e-08	WBGene00016995	1.68101e-08	WBGene00021646	1.52263e-08	WBGene00013090	1.04285e-07	WBGene00002055	6.04155e-08
WBGene00018954	7.80089e-09	WBGene00004855	1.27116e-08	WBGene00002173	1.75544e-08	WBGene00018926	1.91127e-08	WBGene00014255	1.06333e-07	WBGene00017441	6.10242e-08
WBGene00022882	9.19229e-09	WBGene00014179	1.37028e-08	WBGene00000081	1.83925e-08	WBGene00013440	1.96874e-08	WBGene00007248	1.09255e-07	WBGene00011436	6.16354e-08
WBGene00002152	9.28568e-09	WBGene00018073	1.42723e-08	WBGene00011530	1.88798e-08	WBGene00004783	1.98998e-08	WBGene00007649	1.12898e-07	WBGene00008950	6.67376e-08
WBGene00022816	9.59454e-09	WBGene00004008	1.43153e-08	WBGene00019875	2.38887e-08	WBGene00012186	2.27322e-08	WBGene00022500	1.17909e-07	WBGene00017798	6.82269e-08
WBGene00011582	9.88431e-09	WBGene00012110	1.64431e-08	WBGene00001564	2.44733e-08	WBGene00008580	2.29972e-08	WBGene00001135	1.18857e-07	WBGene00003834	8.09823e-08
WBGene00001829	1.05295e-08	WBGene00011948	1.69773e-08	WBGene00021577	2.95004e-08	WBGene00022090	2.61834e-08	WBGene00011582	1.29812e-07	WBGene00012186	8.33887e-08
WBGene00002248	1.17205e-08	WBGene00007248	1.75257e-08	WBGene00012194	3.38186e-08	WBGene00009460	2.86625e-08	WBGene00000175	1.30997e-07	WBGene00019490	8.62413e-08
WBGene00016980	1.24023e-08	WBGene00021118	1.92854e-08	WBGene00009611	3.62197e-08	WBGene00021873	3.13802e-08	WBGene00001263	1.37326e-07	WBGene00006930	9.12987e-08
WBGene00001692	1.38659e-08	WBGene00010848	1.96582e-08	WBGene00002153	3.64617e-08	WBGene00020289	3.24027e-08	WBGene00011376	1.44232e-07	WBGene00017631	9.52605e-08
WBGene00020262	1.43154e-08	WBGene00002153	1.97108e-08	WBGene00018202	3.97604e-08	WBGene00001324	3.47709e-08	WBGene00017144	1.59429e-07	WBGene00020113	1.04099e-07
WBGene00012375	1.45401e-08	WBGene00018672	2.01977e-08	WBGene00010671	4.17341e-08	WBGene00019600	3.71397e-08	WBGene00007833	1.6234e-07	WBGene00003738	1.24411e-07
WBGene00022508	2.05695e-08	WBGene00004209	2.09971e-08	WBGene00013266	4.19969e-08	WBGene00019617	3.94716e-08	WBGene00009866	1.6587e-07	WBGene00021316	1.26141e-07
WBGene00017937	2.18471e-08	WBGene00019617	2.19243e-08	WBGene00008724	4.27842e-08	WBGene00004204	4.25343e-08	WBGene00010848	1.67488e-07	WBGene00004509	1.30097e-07
WBGene00022500	2.73988e-08	WBGene00007479	2.51738e-08	WBGene00018643	4.53069e-08	WBGene00009955	4.44381e-08	WBGene00006777	1.70598e-07	WBGene00009542	1.31449e-07
WBGene00011948	3.16865e-08	WBGene00004045	2.79713e-08	WBGene00018072	4.66707e-08	WBGene00010056	4.51334e-08	WBGene00044799	1.78856e-07	WBGene00011775	1.48166e-07
WBGene00021011	3.39057e-08	WBGene00021465	3.11154e-08	WBGene00017641	5.00171e-08	WBGene00018202	4.51475e-08	WBGene00015214	1.85857e-07	WBGene00009865	1.51771e-07
WBGene00022880	3.62616e-08	WBGene00000175	3.12663e-08	WBGene00004959	5.03424e-08	WBGene00017641	4.62157e-08	WBGene00004752	1.90939e-07	WBGene00013476	1.65388e-07
WBGene00012194	3.6514e-08	WBGene00000872	3.38022e-08	WBGene00012768	5.87894e-08	WBGene00044200	4.62507e-08	WBGene00219318	1.9711e-07	WBGene00019832	1.70523e-07
WBGene00010047	3.85919e-08	WBGene00004053	3.51678e-08	WBGene00012253	6.19585e-08	WBGene00009611	4.91398e-08	WBGene00021118	2.08093e-07	WBGene00019039	1.82798e-07
WBGene00003156	4.53742e-08	WBGene00019601	3.58377e-08	WBGene00004123	6.57533e-08	WBGene00018672	4.93344e-08	WBGene00017179	2.14219e-07	WBGene00011582	1.89824e-07
WBGene00007587	4.80213e-08	WBGene00010757	3.84683e-08	WBGene00012780	6.63583e-08	WBGene00010070	5.87014e-08	WBGene00013801	2.15545e-07	WBGene00003567	1.93891e-07
WBGene00009500	4.86724e-08	WBGene00020154	4.30284e-08	WBGene00006915	6.86089e-08	WBGene00003485	6.32601e-08	WBGene00016091	2.29598e-07	WBGene00017606	2.01651e-07
WBGene00006616	5.15095e-08	WBGene00000218	4.82182e-08	WBGene00009133	7.33458e-08	WBGene00010314	6.62587e-08	WBGene00005006	2.29601e-07	WBGene00019151	2.02818e-07
WBGene00004459	6.24237e-08	WBGene00016898	5.30956e-08	WBGene00012791	8.73567e-08	WBGene00016427	8.05219e-08	WBGene00006902	2.33151e-07	WBGene00018193	2.12805e-07
WBGene00016453	6.73145e-08	WBGene00020936	5.62921e-08	WBGene00009196	9.16794e-08	WBGene00011910	8.23208e-08	WBGene00017556	2.36452e-07	WBGene00235287	2.80678e-07
WBGene00007479	6.86378e-08	WBGene00012592	5.72046e-08	WBGene00010351	9.44486e-08	WBGene00008536	8.66288e-08	WBGene00006688	2.43851e-07	WBGene00009773	2.84535e-07
WBGene00021146	6.99595e-08	WBGene00009143	5.72361e-08	WBGene00000022	9.55969e-08	WBGene00008506	8.9152e-08	WBGene00008336	2.45638e-07	WBGene00009501	2.85713e-07
WBGene00018024	7.19571e-08	WBGene00019151	6.07576e-08	WBGene00013440	9.5836e-08	WBGene00021479	9.2569e-08	WBGene00007384	2.57874e-07	WBGene00021605	2.87605e-07
WBGene00004736	7.60011e-08	WBGene00011791	6.21295e-08	WBGene00004783	9.6587e-08	WBGene00016561	1.02252e-07	WBGene00019819	2.62371e-07	WBGene00019341	2.9035e-07
WBGene00002204	8.67833e-08	WBGene00006616	6.25298e-08	WBGene00018394	1.05071e-07	WBGene00206362	1.07669e-07	WBGene00000897	2.65753e-07	WBGene00000939	2.94286e-07
WBGene00009259	8.73173e-08	WBGene00010061	6.42878e-08	WBGene00001839	1.0833e-07	WBGene00219278	1.07727e-07	WBGene00008627	2.80923e-07	WBGene00003926	2.99517e-07
WBGene00013832	8.74054e-08	WBGene00018547	6.69833e-08	WBGene00003156	1.21025e-07	WBGene00009200	1.21844e-07	WBGene00020775	2.9152e-07	WBGene00013266	3.29861e-07
WBGene00020696	8.74884e-08	WBGene00022391	7.59024e-08	WBGene00010314	1.36918e-07	WBGene00016845	1.25187e-07	WBGene00022554	3.09252e-07	WBGene00003889	3.70681e-07
WBGene00004210	9.73989e-08	WBGene00009770	8.14819e-08	WBGene00002152	1.37162e-07	WBGene00003992	1.27179e-07	WBGene00012194	3.23057e-07	WBGene00000366	3.97234e-07
WBGene00006787	1.03079e-07	WBGene00018208	8.25036e-08	WBGene00016845	1.37545e-07	WBGene00003508	1.35125e-07	WBGene00175031	3.55239e-07	WBGene00017555	4.00327e-07
WBGene00001650	1.15723e-07	WBGene00012768	8.31462e-08	WBGene00017988	1.37836e-07	WBGene00014093	1.38589e-07	WBGene00016242	3.69867e-07	WBGene00019793	4.08142e-07
WBGene00004313	1.16655e-07	WBGene00008654	8.75387e-08	WBGene00000106	1.42725e-07	WBGene00000903	1.39882e-07	WBGene00016316	4.42418e-07	WBGene00007966	4.13698e-07
WBGene00019994	1.18564e-07	WBGene00006612	8.95541e-08	WBGene00015841	1.43682e-07	WBGene00020463	1.55979e-07	WBGene00008945	4.43422e-07	WBGene00020174	4.26498e-07
WBGene00004091	1.2546e-07	WBGene00018900	9.59414e-08	WBGene00021471	1.43828e-07	WBGene00000081	1.5617e-07	WBGene00001482	4.59034e-07	WBGene00008472	4.33071e-07
WBGene00021873	1.31623e-07	WBGene00011523	9.93818e-08	WBGene00010168	1.49377e-07	WBGene00006375	1.58548e-07	WBGene00004064	4.78535e-07	WBGene00006801	4.4557e-07
WBGene00004738	1.35202e-07	WBGene00013220	1.0015e-07	WBGene00013475	1.60124e-07	WBGene00007463	1.59394e-07	WBGene00000031	5.07787e-07	WBGene00012595	4.46893e-07
WBGene00013591	1.38177e-07	WBGene00004951	1.06143e-07	WBGene00003777	1.60927e-07	WBGene00006915	1.63317e-07	WBGene00001137	5.15733e-07	WBGene00017758	4.51219e-07
WBGene00016800	1.39215e-07	WBGene00001263	1.0692e-07	WBGene00020948	1.67817e-07	WBGene00018020	1.79037e-07	WBGene00003602	5.37246e-07	WBGene00012445	4.56019e-07
WBGene00021986	1.41355e-07	WBGene00006727	1.25289e-07	WBGene00020952	1.73572e-07	WBGene00023513	1.93131e-07	WBGene00013091	5.4205e-07	WBGene00015634	4.83164e-07
WBGene00005015	1.46181e-07	WBGene00021607	1.27566e-07	WBGene00003994	1.77861e-07	WBGene00015242	2.04987e-07	WBGene00016824	5.47575e-07	WBGene00001571	5.35212e-07
WBGene00016565	1.47826e-07	WBGene00000732	1.27864e-07	WBGene00021646	2.06701e-07	WBGene00017555	2.08737e-07	WBGene00021316	5.5166e-07	WBGene00004210	5.54411e-07
WBGene00000485	1.55001e-07	WBGene00008422	1.30853e-07	WBGene00011737	2.12904e-07	WBGene00012011	2.13596e-07	WBGene00000036	5.59263e-07	WBGene00009926	6.59947e-07
WBGene00012780	1.62358e-07	WBGene00009285	1.31506e-07	WBGene00009968	2.31531e-07	WBGene00013380	2.15487e-07	WBGene00004053	5.77507e-07	WBGene00006464	6.94967e-07
WBGene00019017	1.67398e-07	WBGene00004904	1.43213e-07	WBGene00021873	2.33646e-07	WBGene00000106	2.37468e-07	WBGene00008005	5.89574e-07	WBGene00010621	6.98736e-07
WBGene00015911	1.69056e-07	WBGene00000688	1.54e-07	WBGene00001558	2.50874e-07	WBGene00015841	2.46855e-07	WBGene00014048	5.94004e-07	WBGene00012194	6.98744e-07
WBGene00006416	1.74231e-07	WBGene00015854	1.55296e-07	WBGene00021711	2.57035e-07	WBGene00018643	2.48092e-07	WBGene00009542	6.02812e-07	WBGene00018073	6.99118e-07
WBGene00006464	1.74877e-07	WBGene00021605	1.58567e-07	WBGene00011099	2.6658e-07	WBGene00003214	2.51756e-07	WBGene00021303	6.06971e-07	WBGene00017988	7.69179e-07
WBGene00219319	1.79963e-07	WBGene00013859	1.60387e-07	WBGene00009587	2.79229e-07	WBGene00002055	2.54877e-07	WBGene00022732	6.20701e-07	WBGene00004736	8.08512e-07
WBGene00009285	1.8031e-07	WBGene00020326	1.69261e-07	WBGene00018073	2.82735e-07	WBGene00004782	2.57069e-07	WBGene00011867	6.55792e-07	WBGene00001530	8.25329e-07
WBGene00004187	1.8422e-07	WBGene00004178	2.08655e-07	WBGene00219278	2.94364e-07	WBGene00012128	2.59356e-07	WBGene00011624	6.6751e-07	WBGene00019435	8.28934e-07
WBGene00017608	1.92406e-07	WBGene00017557	2.12392e-07	WBGene00014087	2.94581e-07	WBGene00000090	2.67451e-07	WBGene00013036	7.21014e-07	WBGene00001259	8.59958e-07
WBGene00000090	2.00513e-07	WBGene00009471	2.14533e-07	WBGene00010070	2.94975e-07	WBGene00012109	2.91988e-07	WBGene00021627	7.65367e-07	WBGene00008033	8.97297e-07
WBGene00003522	2.00686e-07	WBGene00006530	2.18536e-07	WBGene00020053	2.95978e-07	WBGene00000942	2.94538e-07	WBGene00005085	7.78978e-07	WBGene00004187	9.00058e-07
WBGene00000140	2.06483e-07	WBGene00004337	2.24448e-07	WBGene00016424	3.40835e-07	WBGene00009587	2.9759e-07	WBGene00011436	7.90314e-07	WBGene00000396	9.96916e-07
WBGene00003877	2.12779e-07	WBGene00014965	2.25788e-07	WBGene00004904	3.87693e-07	WBGene00003777	3.06128e-07	WBGene00006210	7.98904e-07	WBGene00004264	1.01244e-06
WBGene00004209	2.12952e-07	WBGene00021450	2.31834e-07	WBGene00014093	3.90773e-07	WBGene00018072	3.15593e-07	WBGene00045302	8.02898e-07	WBGene00009133	1.02614e-06
WBGene00021711	2.31e-07	WBGene00021751	2.55988e-07	WBGene00006929	4.0319e-07	WBGene00000882	3.86246e-07	WBGene00002027	8.07608e-07	WBGene00002583	1.07026e-06
WBGene00001259	2.43063e-07	WBGene00009955	2.56234e-07	WBGene00013036	4.16692e-07	WBGene00012780	3.91166e-07	WBGene00007766	8.14957e-07	WBGene00011802	1.08704e-06
WBGene00012131	2.48436e-07	WBGene00021471	2.63493e-07	WBGene00001734	4.43543e-07	WBGene00004703	4.08005e-07	WBGene00015854	8.68087e-07	WBGene00008720	1.1229e-06
WBGene00004053	2.7336e-07	WBGene00016880	2.67939e-07	WBGene00001829	4.4874e-07	WBGene00011530	4.11664e-07	WBGene00001541	9.10456e-07	WBGene00001337	1.15881e-06
WBGene00011214	2.84046e-07	WBGene00004458	2.90309e-07	WBGene00009578	4.52833e-07	WBGene00010988	4.69216e-07	WBGene00004463	9.73005e-07	WBGene00020262	1.18285e-06
WBGene00010061	3.0371e-07	WBGene00004747	2.92654e-07	WBGene00016980	4.53895e-07	WBGene00006093	4.85493e-07	WBGene00018967	9.83811e-07	WBGene00001833	1.22407e-06
WBGene00009578	3.03999e-07	WBGene00005145	3.0719e-07	WBGene00004210	4.5976e-07	WBGene00011212	5.11416e-07	WBGene00009476	9.83936e-07	WBGene00007258	1.2757e-06
WBGene00018900	3.07557e-07	WBGene00003815	3.2101e-07	WBGene00008536	4.91609e-07	WBGene00021471	5.28109e-07	WBGene00014098	1.04095e-06	WBGene00016954	1.2861e-06
WBGene00015094	3.08517e-07	WBGene00050919	3.37708e-07	WBGene00012809	5.11799e-07	WBGene00008970	5.28207e-07	WBGene00019762	1.06892e-06	WBGene00011559	1.34366e-06
WBGene00013549	3.18541e-07	WBGene00021175	3.39004e-07	WBGene00009658	5.11977e-07	WBGene00011175	5.6276e-07	WBGene00007564	1.26961e-06	WBGene00000833	1.3494e-06
WBGene00003751	3.22556e-07	WBGene00013973	3.45339e-07	WBGene00003485	6.31627e-07	WBGene00010556	5.64849e-07	WBGene00022070	1.2706e-06	WBGene00000275	1.3833e-06
WBGene00006495	3.22894e-07	WBGene00010989	3.5172e-07	WBGene00018330	6.70628e-07	WBGene00001603	5.76804e-07	WBGene00022508	1.27085e-06	WBGene00002845	1.41604e-06
WBGene00015806	3.48447e-07	WBGene00018786	3.52781e-07	WBGene00013380	7.51056e-07	WBGene00018330	5.84019e-07	WBGene00020788	1.28684e-06	WBGene00016564	1.45936e-06
WBGene00018350	3.4936e-07	WBGene00009133	3.57754e-07	WBGene00003884	7.87087e-07	WBGene00010168	6.21031e-07	WBGene00021155	1.30696e-06	WBGene00015156	1.52084e-06
WBGene00003058	3.53106e-07	WBGene00013498	3.60765e-07	WBGene00004091	7.90399e-07	WBGene00012203	6.33798e-07	WBGene00000067	1.31033e-06	WBGene00006988	1.52935e-06
WBGene00016995	3.55359e-07	WBGene00018134	3.67372e-07	WBGene00020117	8.86853e-07	WBGene00022391	6.4948e-07	WBGene00017289	1.3911e-06	WBGene00009578	1.54103e-06
WBGene00016968	3.57978e-07	WBGene00007414	3.70628e-07	WBGene00009955	8.90719e-07	WBGene00001734	6.87306e-07	WBGene00009587	1.39385e-06	WBGene00015648	1.56216e-06
WBGene00001539	3.6601e-07	WBGene00007987	3.71719e-07	WBGene00011910	8.9453e-07	WBGene00006876	6.96488e-07	WBGene00005531	1.45116e-06	WBGene00011432	1.5923e-06
WBGene00002054	4.07866e-07	WBGene00007401	3.79203e-07	WBGene00008970	9.27317e-07	WBGene00004209	7.15085e-07	WBGene00010013	1.50671e-06	WBGene00007354	1.64431e-06
WBGene00018967	4.09035e-07	WBGene00019796	3.87624e-07	WBGene00010988	9.3404e-07	WBGene00000420	7.15899e-07	WBGene00020448	1.52989e-06	WBGene00002078	1.70505e-06
WBGene00012018	4.11328e-07	WBGene00016081	3.94291e-07	WBGene00017482	9.44634e-07	WBGene00003606	7.4123e-07	WBGene00007963	1.54816e-06	WBGene00004855	1.76613e-06
WBGene00003514	4.19498e-07	WBGene00016939	4.02313e-07	WBGene00004738	9.53471e-07	WBGene00013290	7.48421e-07	WBGene00005293	1.61145e-06	WBGene00020696	1.80572e-06
WBGene00009583	4.37439e-07	WBGene00019434	4.0562e-07	WBGene00012128	9.82229e-07	WBGene00009884	8.01585e-07	WBGene00013215	1.63264e-06	WBGene00020326	1.82765e-06
WBGene00002055	4.38499e-07	WBGene00012791	4.11169e-07	WBGene00206362	9.84064e-07	WBGene00011791	8.58761e-07	WBGene00018135	1.66015e-06	WBGene00020223	1.87062e-06
WBGene00016120	4.58892e-07	WBGene00019430	4.32601e-07	WBGene00017265	9.95772e-07	WBGene00004210	9.29468e-07	WBGene00001859	1.67519e-06	WBGene00001546	1.87388e-06
WBGene00001397	4.87923e-07	WBGene00010581	4.35609e-07	WBGene00002200	1.00828e-06	WBGene00004459	9.59914e-07	WBGene00020593	1.70283e-06	WBGene00020858	1.93175e-06
WBGene00001081	4.91744e-07	WBGene00010070	4.41622e-07	WBGene00021479	1.01376e-06	WBGene00015306	9.84845e-07	WBGene00015970	1.74211e-06	WBGene00004008	1.99291e-06
WBGene00011985	5.00411e-07	WBGene00022882	4.47542e-07	WBGene00011740	1.03608e-06	WBGene00001259	9.95937e-07	WBGene00019038	1.82516e-06	WBGene00002978	2.11251e-06
WBGene00009122	5.23973e-07	WBGene00003994	4.57024e-07	WBGene00009542	1.04191e-06	WBGene00012194	9.99919e-07	WBGene00004118	1.89198e-06	WBGene00009342	2.13461e-06
WBGene00019875	5.40884e-07	WBGene00013036	4.69004e-07	WBGene00001548	1.07549e-06	WBGene00008274	1.01035e-06	WBGene00003955	1.90021e-06	WBGene00008336	2.19182e-06
WBGene00013290	5.8033e-07	WBGene00003834	4.74771e-07	WBGene00000090	1.12881e-06	WBGene00001827	1.03223e-06	WBGene00000602	2.01968e-06	WBGene00015083	2.25522e-06
WBGene00003915	5.98788e-07	WBGene00006927	4.84349e-07	WBGene00004703	1.13116e-06	WBGene00009542	1.03861e-06	WBGene00005910	2.02385e-06	WBGene00003777	2.2919e-06
WBGene00001839	6.06999e-07	WBGene00000669	4.84511e-07	WBGene00012109	1.27761e-06	WBGene00020948	1.04917e-06	WBGene00007975	2.0298e-06	WBGene00010626	2.2984e-06
WBGene00000831	6.18078e-07	WBGene00019654	4.86417e-07	WBGene00007309	1.30594e-06	WBGene00043743	1.0612e-06	WBGene00006495	2.12954e-06	WBGene00002248	2.31814e-06
WBGene00009507	6.22896e-07	WBGene00009681	4.89887e-07	WBGene00044200	1.33991e-06	WBGene00020406	1.10685e-06	WBGene00008372	2.16133e-06	WBGene00007802	2.38754e-06
WBGene00077732	6.28096e-07	WBGene00001829	4.90057e-07	WBGene00013849	1.42835e-06	WBGene00007372	1.11649e-06	WBGene00007258	2.17723e-06	WBGene00011948	2.40844e-06
WBGene00000942	6.63524e-07	WBGene00000785	5.00692e-07	WBGene00010448	1.46655e-06	WBGene00011737	1.28379e-06	WBGene00003740	2.25736e-06	WBGene00008683	2.42551e-06
WBGene00003482	7.44466e-07	WBGene00001545	5.02003e-07	WBGene00021121	1.48362e-06	WBGene00007088	1.29259e-06	WBGene00016750	2.37838e-06	WBGene00004178	2.48407e-06
WBGene00019819	7.68025e-07	WBGene00018967	5.02159e-07	WBGene00010556	1.50551e-06	WBGene00021577	1.31722e-06	WBGene00017442	2.4571e-06	WBGene00009901	2.49774e-06
WBGene00015504	8.02546e-07	WBGene00003165	5.1395e-07	WBGene00011582	1.55978e-06	WBGene00008743	1.34796e-06	WBGene00015306	2.49899e-06	WBGene00004093	2.50431e-06
WBGene00011775	8.26681e-07	WBGene00003751	5.17947e-07	WBGene00016084	1.59339e-06	WBGene00004945	1.39819e-06	WBGene00001007	2.52803e-06	WBGene00004037	2.60653e-06
WBGene00008854	8.94724e-07	WBGene00000606	5.19215e-07	WBGene00002033	1.62139e-06	WBGene00019020	1.41281e-06	WBGene00003071	2.53947e-06	WBGene00021711	2.69148e-06
WBGene00018039	9.14741e-07	WBGene00022508	5.24061e-07	WBGene00006415	1.6887e-06	WBGene00006734	1.42579e-06	WBGene00001688	2.54665e-06	WBGene00019146	2.7508e-06
WBGene00009865	9.38852e-07	WBGene00018496	5.25071e-07	WBGene00303015	1.70724e-06	WBGene00000803	1.44205e-06	WBGene00011530	2.64169e-06	WBGene00018871	2.81782e-06
WBGene00000602	9.41781e-07	WBGene00003037	5.39086e-07	WBGene00012851	1.72573e-06	WBGene00017930	1.47029e-06	WBGene00017603	2.65509e-06	WBGene00009324	2.82507e-06
WBGene00012115	9.42614e-07	WBGene00014101	5.60812e-07	WBGene00003214	1.77479e-06	WBGene00002173	1.49227e-06	WBGene00001598	2.79491e-06	WBGene00017642	2.84261e-06
WBGene00002850	9.47111e-07	WBGene00003151	5.92616e-07	WBGene00013290	1.78161e-06	WBGene00018073	1.57093e-06	WBGene00015492	2.80389e-06	WBGene00004358	2.87004e-06
WBGene00009185	9.59646e-07	WBGene00004265	6.03062e-07	WBGene00002204	1.8674e-06	WBGene00017988	1.70494e-06	WBGene00003608	2.81055e-06	WBGene00000080	2.90734e-06
WBGene00004429	1.00594e-06	WBGene00001839	6.41418e-07	WBGene00011431	2.00393e-06	WBGene00006928	1.8207e-06	WBGene00017769	2.94718e-06	WBGene00012036	2.94327e-06
WBGene00019520	1.02819e-06	WBGene00015102	6.77286e-07	WBGene00015242	2.00645e-06	WBGene00014028	1.83658e-06	WBGene00019795	3.0234e-06	WBGene00007746	2.98587e-06
WBGene00020463	1.05869e-06	WBGene00000602	7.02982e-07	WBGene00009770	2.02005e-06	WBGene00020936	1.86242e-06	WBGene00016093	3.0242e-06	WBGene00012131	3.14126e-06
WBGene00002010	1.07487e-06	WBGene00007169	7.14074e-07	WBGene00015102	2.1066e-06	WBGene00009658	1.92375e-06	WBGene00021003	3.04647e-06	WBGene00000872	3.28121e-06
WBGene00017594	1.13309e-06	WBGene00018433	7.48209e-07	WBGene00011950	2.16543e-06	WBGene00004254	1.95118e-06	WBGene00006449	3.06157e-06	WBGene00006803	3.2898e-06
WBGene00011182	1.14219e-06	WBGene00021146	7.54729e-07	WBGene00018268	2.25592e-06	WBGene00011740	1.97983e-06	WBGene00015499	3.09668e-06	WBGene00017937	3.29007e-06
WBGene00009368	1.14475e-06	WBGene00002206	7.61349e-07	WBGene00219318	2.2734e-06	WBGene00020117	2.02079e-06	WBGene00009948	3.21564e-06	WBGene00011994	3.35701e-06
WBGene00001827	1.1535e-06	WBGene00002804	7.75832e-07	WBGene00016824	2.28791e-06	WBGene00021986	2.04822e-06	WBGene00020919	3.48605e-06	WBGene00000942	3.37156e-06
WBGene00011559	1.17021e-06	WBGene00018235	7.81568e-07	WBGene00003602	2.308e-06	WBGene00019783	2.10061e-06	WBGene00007687	3.58714e-06	WBGene00000785	3.41197e-06
WBGene00003958	1.17283e-06	WBGene00010876	7.95684e-07	WBGene00004424	2.42263e-06	WBGene00016424	2.10642e-06	WBGene00015235	3.69391e-06	WBGene00015970	3.50101e-06
WBGene00019086	1.18197e-06	WBGene00007834	8.05152e-07	WBGene00009583	2.43972e-06	WBGene00008003	2.14623e-06	WBGene00004045	3.70883e-06	WBGene00010357	3.52326e-06
WBGene00017930	1.19625e-06	WBGene00015648	8.23191e-07	WBGene00003992	2.46818e-06	WBGene00021118	2.18547e-06	WBGene00021171	3.91221e-06	WBGene00015367	3.74467e-06
WBGene00004395	1.19813e-06	WBGene00003789	8.31707e-07	WBGene00001102	2.48762e-06	WBGene00003926	2.20871e-06	WBGene00017019	3.95267e-06	WBGene00019919	3.7657e-06
WBGene00011560	1.30747e-06	WBGene00219278	8.35747e-07	WBGene00002055	2.52625e-06	WBGene00000830	2.26231e-06	WBGene00020496	3.97836e-06	WBGene00009955	3.76659e-06
WBGene00013388	1.35488e-06	WBGene00007369	9.12609e-07	WBGene00001057	2.59039e-06	WBGene00003994	2.38008e-06	WBGene00044508	4.00349e-06	WBGene00003979	3.79545e-06
WBGene00019832	1.55077e-06	WBGene00016980	9.70121e-07	WBGene00022816	2.67674e-06	WBGene00001650	2.40653e-06	WBGene00012149	4.08475e-06	WBGene00002850	3.84044e-06
WBGene00011330	1.56797e-06	WBGene00011582	9.8563e-07	WBGene00001259	2.80788e-06	WBGene00012131	2.45189e-06	WBGene00012008	4.22092e-06	WBGene00019086	4.16612e-06
WBGene00022048	1.64109e-06	WBGene00012638	1.02938e-06	WBGene00005099	2.86528e-06	WBGene00016980	2.53566e-06	WBGene00005634	4.32664e-06	WBGene00007787	4.23736e-06
WBGene00003389	1.65162e-06	WBGene00002229	1.15393e-06	WBGene00015094	2.95395e-06	WBGene00016995	2.73968e-06	WBGene00007415	4.42616e-06	WBGene00001397	4.25008e-06
WBGene00017892	1.68264e-06	WBGene00018954	1.17989e-06	WBGene00003650	3.0532e-06	WBGene00009681	2.75054e-06	WBGene00002238	4.53751e-06	WBGene00018202	4.28153e-06
WBGene00020858	1.73645e-06	WBGene00014096	1.23552e-06	WBGene00007966	3.10257e-06	WBGene00001569	2.83963e-06	WBGene00015132	4.60079e-06	WBGene00011431	4.37907e-06
WBGene00219278	1.75324e-06	WBGene00016885	1.32743e-06	WBGene00021118	3.17674e-06	WBGene00010281	2.84803e-06	WBGene00013496	4.72237e-06	WBGene00021118	4.53579e-06
WBGene00006820	1.81955e-06	WBGene00019169	1.35004e-06	WBGene00008274	3.18048e-06	WBGene00001580	2.86505e-06	WBGene00000090	4.85472e-06	WBGene00004755	4.58096e-06
WBGene00006727	1.83396e-06	WBGene00006787	1.36492e-06	WBGene00000420	3.18775e-06	WBGene00045381	2.87997e-06	WBGene00008517	4.90204e-06	WBGene00000022	4.60927e-06
WBGene00019151	1.88019e-06	WBGene00022880	1.37219e-06	WBGene00003058	3.20031e-06	WBGene00003958	2.88658e-06	WBGene00011111	5.03687e-06	WBGene00022664	4.62808e-06
WBGene00011260	1.98853e-06	WBGene00020239	1.38689e-06	WBGene00008898	3.32543e-06	WBGene00022712	2.965e-06	WBGene00009343	5.09558e-06	WBGene00004378	4.63073e-06
WBGene00015306	2.00931e-06	WBGene00011610	1.40788e-06	WBGene00008854	3.33645e-06	WBGene00006814	3.03837e-06	WBGene00007482	5.39389e-06	WBGene00007463	4.65591e-06
WBGene00001599	2.0529e-06	WBGene00018065	1.41198e-06	WBGene00020297	3.36589e-06	WBGene00007802	3.15073e-06	WBGene00006077	5.77955e-06	WBGene00000081	4.75073e-06
WBGene00013475	2.05915e-06	WBGene00013672	1.41687e-06	WBGene00007088	3.44865e-06	WBGene00011431	3.20172e-06	WBGene00018783	5.79304e-06	WBGene00012100	4.85538e-06
WBGene00001598	2.07154e-06	WBGene00013832	1.48503e-06	WBGene00013622	3.47186e-06	WBGene00018310	3.20384e-06	WBGene00011775	5.84878e-06	WBGene00013388	4.86335e-06
WBGene00015909	2.10765e-06	WBGene00018021	1.61914e-06	WBGene00012198	3.49235e-06	WBGene00006929	3.2165e-06	WBGene00008321	5.86025e-06	WBGene00020511	4.95827e-06
WBGene00012491	2.139e-06	WBGene00012915	1.63101e-06	WBGene00020289	4.04542e-06	WBGene00008720	3.24481e-06	WBGene00015367	6.08956e-06	WBGene00000215	5.02899e-06
WBGene00011867	2.15577e-06	WBGene00220259	1.63862e-06	WBGene00000688	4.05377e-06	WBGene00008957	3.4699e-06	WBGene00044901	6.16108e-06	WBGene00019531	5.14494e-06
WBGene00010977	2.16279e-06	WBGene00011867	1.65159e-06	WBGene00012131	4.09904e-06	WBGene00008684	3.52744e-06	WBGene00010182	6.21368e-06	WBGene00016303	5.15941e-06
WBGene00020053	2.21625e-06	WBGene00017892	1.73677e-06	WBGene00018906	4.10963e-06	WBGene00016954	3.56068e-06	WBGene00011302	6.58694e-06	WBGene00012916	5.22491e-06
WBGene00010974	2.23081e-06	WBGene00004037	1.76128e-06	WBGene00021751	4.14768e-06	WBGene00017050	3.56152e-06	WBGene00001571	6.65136e-06	WBGene00003534	5.34719e-06
WBGene00015467	2.23506e-06	WBGene00001607	1.93124e-06	WBGene00018024	4.26719e-06	WBGene00011867	3.60262e-06	WBGene00010989	6.75824e-06	WBGene00017814	5.6212e-06
WBGene00016954	2.26264e-06	WBGene00002008	2.03049e-06	WBGene00005925	4.2826e-06	WBGene00020700	3.60525e-06	WBGene00013483	6.79372e-06	WBGene00012592	5.75547e-06
WBGene00011791	2.35343e-06	WBGene00017437	2.10683e-06	WBGene00006598	4.29131e-06	WBGene00007109	3.62267e-06	WBGene00019660	6.93013e-06	WBGene00013036	6.01856e-06
WBGene00003798	2.41379e-06	WBGene00004706	2.16579e-06	WBGene00001827	4.3839e-06	WBGene00001579	3.77416e-06	WBGene00018024	6.98871e-06	WBGene00016239	6.05827e-06
WBGene00017015	2.4476e-06	WBGene00000113	2.18656e-06	WBGene00002010	4.52984e-06	WBGene00001543	3.77984e-06	WBGene00002200	7.02203e-06	WBGene00018435	6.37456e-06
WBGene00007987	2.49503e-06	WBGene00011047	2.21588e-06	WBGene00020707	4.56373e-06	WBGene00010631	3.83042e-06	WBGene00005694	7.11145e-06	WBGene00007587	6.46222e-06
WBGene00015242	2.5335e-06	WBGene00002238	2.28752e-06	WBGene00010165	4.56828e-06	WBGene00012243	3.86172e-06	WBGene00008565	7.20011e-06	WBGene00021003	6.66427e-06
WBGene00016081	2.59189e-06	WBGene00012585	2.29152e-06	WBGene00000667	4.73453e-06	WBGene00020679	3.8671e-06	WBGene00021448	7.24647e-06	WBGene00001709	6.67058e-06
WBGene00001536	2.64975e-06	WBGene00003955	2.38043e-06	WBGene00012978	4.77336e-06	WBGene00010757	3.8805e-06	WBGene00010883	7.30392e-06	WBGene00015841	6.72643e-06
WBGene00002173	2.73336e-06	WBGene00012019	2.48381e-06	WBGene00017050	4.89849e-06	WBGene00000833	4.01809e-06	WBGene00000136	7.59694e-06	WBGene00019169	6.79517e-06
WBGene00011910	2.91293e-06	WBGene00013226	2.49813e-06	WBGene00021287	5.01677e-06	WBGene00003052	4.04732e-06	WBGene00022090	7.72401e-06	WBGene00021471	6.86289e-06
WBGene00001263	2.9277e-06	WBGene00017641	2.52702e-06	WBGene00012243	5.04404e-06	WBGene00008422	4.14904e-06	WBGene00022753	7.82978e-06	WBGene00000482	6.91605e-06
WBGene00019434	2.92842e-06	WBGene00206362	2.54078e-06	WBGene00015371	5.05012e-06	WBGene00018024	4.16335e-06	WBGene00020506	8.0214e-06	WBGene00002225	6.9606e-06
WBGene00001134	2.95276e-06	WBGene00006562	2.55792e-06	WBGene00015050	5.16539e-06	WBGene00020053	4.29761e-06	WBGene00020600	8.05656e-06	WBGene00010612	7.03675e-06
WBGene00009065	3.08163e-06	WBGene00021721	2.65498e-06	WBGene00004736	5.20116e-06	WBGene00002050	4.33605e-06	WBGene00003397	8.26239e-06	WBGene00001135	7.10425e-06
WBGene00003994	3.08404e-06	WBGene00011337	2.70413e-06	WBGene00012186	5.8973e-06	WBGene00009038	4.46387e-06	WBGene00011182	8.34324e-06	WBGene00003068	7.22048e-06
WBGene00013985	3.11109e-06	WBGene00017964	2.71591e-06	WBGene00020576	5.98411e-06	WBGene00001607	4.47345e-06	WBGene00017578	8.82751e-06	WBGene00002228	7.29959e-06
WBGene00002637	3.11317e-06	WBGene00002694	2.73553e-06	WBGene00016954	6.17479e-06	WBGene00022816	4.47576e-06	WBGene00016046	9.21137e-06	WBGene00021468	7.49282e-06
WBGene00009241	3.12976e-06	WBGene00000753	2.84829e-06	WBGene00009460	6.19882e-06	WBGene00000667	4.51624e-06	WBGene00000460	9.22249e-06	WBGene00004463	7.65267e-06
WBGene00019613	3.15293e-06	WBGene00012809	2.90077e-06	WBGene00006093	6.4405e-06	WBGene00001397	4.51634e-06	WBGene00021256	9.3094e-06	WBGene00009770	7.86603e-06
WBGene00010351	3.34871e-06	WBGene00219319	2.90921e-06	WBGene00006568	6.47901e-06	WBGene00006414	4.52089e-06	WBGene00016277	9.34207e-06	WBGene00008634	7.93414e-06
WBGene00004259	3.52765e-06	WBGene00013216	2.9106e-06	WBGene00003606	6.75499e-06	WBGene00022800	4.60809e-06	WBGene00000712	9.45934e-06	WBGene00017885	8.07777e-06
WBGene00010144	3.53307e-06	WBGene00019964	2.95159e-06	WBGene00003926	6.83324e-06	WBGene00009122	4.62594e-06	WBGene00000395	9.53684e-06	WBGene00002238	8.15817e-06
WBGene00002297	3.57933e-06	WBGene00002083	3.01623e-06	WBGene00020679	6.99794e-06	WBGene00003955	4.63802e-06	WBGene00018671	9.59163e-06	WBGene00002051	8.26417e-06
WBGene00020707	3.62997e-06	WBGene00008541	3.08901e-06	WBGene00006465	7.04277e-06	WBGene00010067	4.67493e-06	WBGene00012500	9.6012e-06	WBGene00012149	8.37529e-06
WBGene00077769	3.67397e-06	WBGene00020560	3.36499e-06	WBGene00006876	7.06482e-06	WBGene00007732	4.82862e-06	WBGene00015424	9.64685e-06	WBGene00020612	9.01903e-06
WBGene00012585	3.7741e-06	WBGene00001397	3.45897e-06	WBGene00015909	7.13917e-06	WBGene00020997	5.04082e-06	WBGene00000239	9.818e-06	WBGene00012768	9.32238e-06
WBGene00002694	3.79867e-06	WBGene00011261	3.66932e-06	WBGene00001090	7.31773e-06	WBGene00003979	5.14545e-06	WBGene00013716	1.01762e-05	WBGene00000771	9.45745e-06
WBGene00009149	3.82225e-06	WBGene00019259	3.72167e-06	WBGene00010241	7.90133e-06	WBGene00016700	5.2492e-06	WBGene00044447	1.0225e-05	WBGene00003514	9.93323e-06
WBGene00018268	3.89647e-06	WBGene00001796	3.88033e-06	WBGene00001606	8.00914e-06	WBGene00001137	5.2599e-06	WBGene00004875	1.04133e-05	WBGene00009100	9.97989e-06
WBGene00008506	3.90771e-06	WBGene00022060	3.91072e-06	WBGene00020262	8.08127e-06	WBGene00001621	5.46783e-06	WBGene00004756	1.08331e-05	WBGene00006940	1.00263e-05
WBGene00003959	4.23356e-06	WBGene00012780	4.27236e-06	WBGene00018959	8.0858e-06	WBGene00015148	5.5813e-06	WBGene00011595	1.10179e-05	WBGene00011836	1.02445e-05
WBGene00000550	4.30836e-06	WBGene00015909	4.33227e-06	WBGene00194869	8.44341e-06	WBGene00008423	5.58435e-06	WBGene00194832	1.10256e-05	WBGene00002297	1.09099e-05
WBGene00012326	4.31185e-06	WBGene00004509	4.35947e-06	WBGene00017608	8.5298e-06	WBGene00010061	5.68263e-06	WBGene00020107	1.10404e-05	WBGene00016170	1.1043e-05
WBGene00004143	4.43885e-06	WBGene00001102	4.5625e-06	WBGene00008743	8.53417e-06	WBGene00011994	5.7102e-06	WBGene00003844	1.12123e-05	WBGene00003877	1.11844e-05
WBGene00018786	4.54618e-06	WBGene00017183	4.6551e-06	WBGene00012011	8.65402e-06	WBGene00013011	5.7549e-06	WBGene00019141	1.14659e-05	WBGene00013011	1.12732e-05
WBGene00003789	4.54655e-06	WBGene00003798	4.83903e-06	WBGene00007866	8.65824e-06	WBGene00008546	6.02384e-06	WBGene00017435	1.1631e-05	WBGene00022880	1.13503e-05
WBGene00001581	4.5773e-06	WBGene00009070	4.95439e-06	WBGene00017416	8.73489e-06	WBGene00000031	6.29667e-06	WBGene00001061	1.17179e-05	WBGene00006734	1.13993e-05
WBGene00008434	4.69447e-06	WBGene00007109	4.96997e-06	WBGene00009200	8.74971e-06	WBGene00020007	6.34739e-06	WBGene00020883	1.2067e-05	WBGene00000240	1.15407e-05
WBGene00012500	4.92005e-06	WBGene00015367	5.02359e-06	WBGene00005177	8.77334e-06	WBGene00001029	6.34806e-06	WBGene00005013	1.25835e-05	WBGene00007401	1.15621e-05
WBGene00010900	4.92636e-06	WBGene00000215	5.33718e-06	WBGene00016800	8.8077e-06	WBGene00010047	6.40175e-06	WBGene00020151	1.27774e-05	WBGene00017373	1.17997e-05
WBGene00011737	5.00138e-06	WBGene00019085	5.38874e-06	WBGene00007463	9.14283e-06	WBGene00011951	6.58354e-06	WBGene00016670	1.29377e-05	WBGene00020553	1.18203e-05
WBGene00004093	5.00233e-06	WBGene00021577	5.5175e-06	WBGene00021003	9.24552e-06	WBGene00000831	6.75556e-06	WBGene00015045	1.31105e-05	WBGene00010556	1.18665e-05
WBGene00014101	5.15456e-06	WBGene00006894	5.52973e-06	WBGene00004458	9.58143e-06	WBGene00010612	7.21152e-06	WBGene00010874	1.3326e-05	WBGene00019154	1.1952e-05
WBGene00000275	5.18648e-06	WBGene00012596	5.74988e-06	WBGene00007448	9.81088e-06	WBGene00004736	7.38336e-06	WBGene00018069	1.37641e-05	WBGene00050919	1.20731e-05
WBGene00002228	5.34055e-06	WBGene00000251	5.92608e-06	WBGene00006928	1.00523e-05	WBGene00019503	7.58541e-06	WBGene00001596	1.42972e-05	WBGene00002174	1.22191e-05
WBGene00017641	5.53204e-06	WBGene00018321	6.02539e-06	WBGene00016561	1.02709e-05	WBGene00013498	7.72334e-06	WBGene00005912	1.47402e-05	WBGene00021986	1.4092e-05
WBGene00019586	5.64285e-06	WBGene00009572	6.13554e-06	WBGene00010061	1.03241e-05	WBGene00009153	7.80187e-06	WBGene00010165	1.50395e-05	WBGene00008660	1.41673e-05
WBGene00001093	5.83829e-06	WBGene00019586	6.17953e-06	WBGene00009646	1.07246e-05	WBGene00013944	7.87789e-06	WBGene00003072	1.53047e-05	WBGene00006539	1.51803e-05
WBGene00003979	6.02908e-06	WBGene00017482	6.30186e-06	WBGene00003062	1.0869e-05	WBGene00006612	7.88779e-06	WBGene00020508	1.53188e-05	WBGene00020707	1.52171e-05
WBGene00018607	6.03734e-06	WBGene00008107	6.30804e-06	WBGene00018635	1.11495e-05	WBGene00020952	7.89823e-06	WBGene00019989	1.53565e-05	WBGene00011212	1.53796e-05
WBGene00021282	6.04761e-06	WBGene00022664	6.53238e-06	WBGene00007093	1.13856e-05	WBGene00010989	8.46071e-06	WBGene00022409	1.54293e-05	WBGene00016405	1.55605e-05
WBGene00017281	6.0569e-06	WBGene00017816	6.59308e-06	WBGene00017643	1.16377e-05	WBGene00008336	8.56753e-06	WBGene00002998	1.54725e-05	WBGene00011331	1.5852e-05
WBGene00011950	6.18729e-06	WBGene00020948	6.78116e-06	WBGene00013880	1.21479e-05	WBGene00008874	8.69043e-06	WBGene00015607	1.55426e-05	WBGene00017302	1.58978e-05
WBGene00009401	6.46699e-06	WBGene00012615	6.80314e-06	WBGene00017629	1.25361e-05	WBGene00022814	9.00811e-06	WBGene00013325	1.58269e-05	WBGene00003072	1.60488e-05
WBGene00017843	6.57471e-06	WBGene00012632	6.80573e-06	WBGene00011049	1.26364e-05	WBGene00019841	9.22369e-06	WBGene00013962	1.59772e-05	WBGene00001581	1.60917e-05
WBGene00006437	6.73414e-06	WBGene00017024	6.98681e-06	WBGene00001543	1.27291e-05	WBGene00017629	9.50503e-06	WBGene00003086	1.60424e-05	WBGene00021110	1.61111e-05
WBGene00020652	6.83945e-06	WBGene00019804	7.0807e-06	WBGene00020491	1.27619e-05	WBGene00010671	9.5435e-06	WBGene00006465	1.65265e-05	WBGene00005051	1.61704e-05
WBGene00019793	6.95345e-06	WBGene00004737	7.14521e-06	WBGene00006902	1.27919e-05	WBGene00009185	9.70494e-06	WBGene00012764	1.67314e-05	WBGene00007792	1.67294e-05
WBGene00206362	7.58604e-06	WBGene00016954	7.37751e-06	WBGene00009884	1.33082e-05	WBGene00001186	9.72522e-06	WBGene00000022	1.67844e-05	WBGene00003186	1.67641e-05
WBGene00013509	7.67476e-06	WBGene00005177	7.52698e-06	WBGene00010324	1.34167e-05	WBGene00020268	9.81181e-06	WBGene00009769	1.70812e-05	WBGene00023425	1.75503e-05
WBGene00012109	7.76259e-06	WBGene00014169	7.6643e-06	WBGene00000803	1.35921e-05	WBGene00018321	9.86583e-06	WBGene00020534	1.76094e-05	WBGene00005635	1.81085e-05
WBGene00004042	8.02686e-06	WBGene00016155	7.75598e-06	WBGene00004209	1.36507e-05	WBGene00010165	9.96519e-06	WBGene00019216	1.78788e-05	WBGene00018949	1.82044e-05
WBGene00000785	8.04737e-06	WBGene00004955	7.91412e-06	WBGene00002206	1.39273e-05	WBGene00018967	1.01152e-05	WBGene00002055	1.79904e-05	WBGene00019313	1.82868e-05
WBGene00018438	8.06026e-06	WBGene00015638	8.51741e-06	WBGene00011087	1.40585e-05	WBGene00007484	1.01498e-05	WBGene00014019	1.83371e-05	WBGene00007444	1.84997e-05
WBGene00004783	8.16824e-06	WBGene00019146	8.61059e-06	WBGene00008720	1.44325e-05	WBGene00006517	1.04725e-05	WBGene00020777	1.84087e-05	WBGene00011339	1.89566e-05
WBGene00019804	8.26504e-06	WBGene00013830	8.94551e-06	WBGene00003586	1.44812e-05	WBGene00021174	1.04919e-05	WBGene00006464	1.8608e-05	WBGene00011885	1.9105e-05
WBGene00002804	8.37723e-06	WBGene00018237	9.06737e-06	WBGene00018933	1.46632e-05	WBGene00021713	1.0528e-05	WBGene00009237	1.87765e-05	WBGene00021538	1.91314e-05
WBGene00000180	8.46912e-06	WBGene00000613	9.12981e-06	WBGene00018252	1.52248e-05	WBGene00001713	1.08326e-05	WBGene00006623	2.07496e-05	WBGene00001187	1.95012e-05
WBGene00004458	8.4892e-06	WBGene00006820	9.24244e-06	WBGene00004698	1.53894e-05	WBGene00017482	1.09374e-05	WBGene00021518	2.0837e-05	WBGene00009587	2.01231e-05
WBGene00011664	8.64995e-06	WBGene00004204	9.34937e-06	WBGene00017798	1.53917e-05	WBGene00001007	1.10751e-05	WBGene00008887	2.18413e-05	WBGene00020559	2.04818e-05
WBGene00018712	8.94633e-06	WBGene00009365	9.38445e-06	WBGene00019085	1.56263e-05	WBGene00016844	1.10759e-05	WBGene00004503	2.18652e-05	WBGene00010456	2.0673e-05
WBGene00019421	8.95589e-06	WBGene00012253	9.38622e-06	WBGene00021607	1.57106e-05	WBGene00001606	1.11352e-05	WBGene00016124	2.23804e-05	WBGene00003393	2.06965e-05
WBGene00013540	9.00942e-06	WBGene00015242	9.61594e-06	WBGene00001079	1.61233e-05	WBGene00009678	1.12824e-05	WBGene00009334	2.2503e-05	WBGene00013894	2.12743e-05
WBGene00021003	9.28036e-06	WBGene00013475	9.69088e-06	WBGene00004459	1.62254e-05	WBGene00021034	1.16593e-05	WBGene00043743	2.25054e-05	WBGene00005773	2.13439e-05
WBGene00012592	9.3809e-06	WBGene00010647	9.74371e-06	WBGene00021492	1.63797e-05	WBGene00021372	1.21256e-05	WBGene00235120	2.33501e-05	WBGene00004104	2.19689e-05
WBGene00003086	9.72801e-06	WBGene00012978	9.853e-06	WBGene00011687	1.64433e-05	WBGene00021472	1.2611e-05	WBGene00005596	2.34329e-05	WBGene00016375	2.21934e-05
WBGene00015199	9.85178e-06	WBGene00010785	9.98683e-06	WBGene00020174	1.6716e-05	WBGene00006415	1.27177e-05	WBGene00002206	2.34548e-05	WBGene00014813	2.22631e-05
WBGene00017050	1.03208e-05	WBGene00017936	1.07135e-05	WBGene00000585	1.76854e-05	WBGene00007813	1.29896e-05	WBGene00016980	2.38436e-05	WBGene00010351	2.24165e-05
WBGene00018202	1.03947e-05	WBGene00021174	1.08248e-05	WBGene00000738	1.77219e-05	WBGene00008724	1.33475e-05	WBGene00011575	2.47157e-05	WBGene00011095	2.24221e-05
WBGene00010284	1.07145e-05	WBGene00006968	1.10467e-05	WBGene00004782	1.7979e-05	WBGene00019900	1.35082e-05	WBGene00010920	2.47759e-05	WBGene00004459	2.24395e-05
WBGene00008033	1.0781e-05	WBGene00013290	1.12775e-05	WBGene00044367	1.82737e-05	WBGene00020241	1.35517e-05	WBGene00010888	2.50503e-05	WBGene00016129	2.24711e-05
WBGene00006093	1.08168e-05	WBGene00000609	1.14107e-05	WBGene00022814	1.84337e-05	WBGene00019313	1.39117e-05	WBGene00013930	2.51749e-05	WBGene00000625	2.25243e-05
WBGene00021496	1.08269e-05	WBGene00009866	1.14555e-05	WBGene00000067	1.88879e-05	WBGene00000175	1.44222e-05	WBGene00008581	2.53545e-05	WBGene00020022	2.39613e-05
WBGene00001603	1.1039e-05	WBGene00019922	1.15687e-05	WBGene00013220	1.88951e-05	WBGene00007916	1.45089e-05	WBGene00006147	2.54767e-05	WBGene00018711	2.4011e-05
WBGene00010920	1.10615e-05	WBGene00044455	1.17471e-05	WBGene00003958	1.90142e-05	WBGene00015629	1.45819e-05	WBGene00008775	2.65985e-05	WBGene00004985	2.46965e-05
WBGene00006523	1.11351e-05	WBGene00007694	1.20472e-05	WBGene00010627	1.93241e-05	WBGene00018268	1.48471e-05	WBGene00000667	2.78353e-05	WBGene00015232	2.471e-05
WBGene00007998	1.12328e-05	WBGene00017800	1.21314e-05	WBGene00000031	1.93512e-05	WBGene00000897	1.51039e-05	WBGene00003993	2.79979e-05	WBGene00007372	2.48365e-05
WBGene00006465	1.14659e-05	WBGene00012128	1.21458e-05	WBGene00010977	1.93934e-05	WBGene00013388	1.51605e-05	WBGene00020366	2.83815e-05	WBGene00005425	2.52059e-05
WBGene00006449	1.16647e-05	WBGene00009368	1.2458e-05	WBGene00008580	1.95048e-05	WBGene00007412	1.53807e-05	WBGene00010279	2.89208e-05	WBGene00011950	2.53792e-05
WBGene00020254	1.17958e-05	WBGene00015743	1.28168e-05	WBGene00020241	1.96374e-05	WBGene00019820	1.55235e-05	WBGene00019406	2.983e-05	WBGene00020068	2.57327e-05
WBGene00012445	1.20116e-05	WBGene00012769	1.28725e-05	WBGene00008546	1.97212e-05	WBGene00022253	1.55506e-05	WBGene00007707	2.98788e-05	WBGene00020440	2.60288e-05
WBGene00001074	1.20621e-05	WBGene00002218	1.31839e-05	WBGene00018967	1.9955e-05	WBGene00021518	1.67873e-05	WBGene00019531	3.01127e-05	WBGene00012583	2.64242e-05
WBGene00000715	1.20796e-05	WBGene00008427	1.32378e-05	WBGene00011212	1.99816e-05	WBGene00003588	1.68437e-05	WBGene00004482	3.04458e-05	WBGene00014093	2.65138e-05
WBGene00011629	1.21495e-05	WBGene00194714	1.33687e-05	WBGene00021627	2.01778e-05	WBGene00017800	1.72694e-05	WBGene00018996	3.10677e-05	WBGene00007414	2.662e-05
WBGene00009133	1.21551e-05	WBGene00004259	1.3399e-05	WBGene00008053	2.07037e-05	WBGene00010920	1.76159e-05	WBGene00011230	3.11073e-05	WBGene00004349	2.67193e-05
WBGene00007555	1.22732e-05	WBGene00003796	1.36115e-05	WBGene00003522	2.13964e-05	WBGene00013220	1.80288e-05	WBGene00000967	3.1184e-05	WBGene00006780	2.7178e-05
WBGene00009038	1.23037e-05	WBGene00006164	1.36911e-05	WBGene00007802	2.1505e-05	WBGene00007093	1.8573e-05	WBGene00011061	3.14294e-05	WBGene00003550	2.72793e-05
WBGene00016194	1.24051e-05	WBGene00009342	1.37019e-05	WBGene00013107	2.2006e-05	WBGene00021121	1.886e-05	WBGene00219278	3.2407e-05	WBGene00005179	2.7302e-05
WBGene00016824	1.24318e-05	WBGene00011061	1.40707e-05	WBGene00020268	2.22822e-05	WBGene00010848	1.89122e-05	WBGene00007250	3.28114e-05	WBGene00004091	2.7979e-05
WBGene00004424	1.27149e-05	WBGene00018949	1.41706e-05	WBGene00004093	2.24695e-05	WBGene00012809	1.91197e-05	WBGene00194852	3.33847e-05	WBGene00010661	2.80934e-05
WBGene00013060	1.27765e-05	WBGene00009038	1.45901e-05	WBGene00013944	2.25749e-05	WBGene00017071	1.91794e-05	WBGene00020743	3.36868e-05	WBGene00007887	2.8473e-05
WBGene00010883	1.30306e-05	WBGene00018319	1.47182e-05	WBGene00008672	2.29464e-05	WBGene00011260	1.94471e-05	WBGene00009471	3.37116e-05	WBGene00000067	2.84885e-05
WBGene00019712	1.30468e-05	WBGene00012193	1.50965e-05	WBGene00013235	2.34905e-05	WBGene00021003	1.95955e-05	WBGene00005999	3.41575e-05	WBGene00020342	2.84973e-05
WBGene00016558	1.30845e-05	WBGene00015698	1.52582e-05	WBGene00000215	2.35482e-05	WBGene00009926	1.9614e-05	WBGene00011253	3.45642e-05	WBGene00001872	2.85496e-05
WBGene00020827	1.30931e-05	WBGene00001973	1.55049e-05	WBGene00001119	2.35907e-05	WBGene00001530	1.99573e-05	WBGene00015558	3.46204e-05	WBGene00007920	2.90707e-05
WBGene00003036	1.3216e-05	WBGene00010974	1.56812e-05	WBGene00045381	2.3686e-05	WBGene00006941	2.0037e-05	WBGene00007916	3.47716e-05	WBGene00016124	2.92243e-05
WBGene00017606	1.35241e-05	WBGene00020435	1.56882e-05	WBGene00044333	2.37779e-05	WBGene00018563	2.04627e-05	WBGene00015689	3.55028e-05	WBGene00016800	3.00878e-05
WBGene00022718	1.35651e-05	WBGene00022712	1.59054e-05	WBGene00018948	2.41593e-05	WBGene00044329	2.04831e-05	WBGene00018657	3.55851e-05	WBGene00017965	3.03516e-05
WBGene00009955	1.39332e-05	WBGene00010673	1.60204e-05	WBGene00001979	2.4502e-05	WBGene00021711	2.07586e-05	WBGene00018355	3.58162e-05	WBGene00012809	3.07566e-05
WBGene00000366	1.41632e-05	WBGene00021051	1.61602e-05	WBGene00016202	2.4909e-05	WBGene00004093	2.11134e-05	WBGene00016507	3.60508e-05	WBGene00000223	3.12233e-05
WBGene00011376	1.4219e-05	WBGene00011959	1.6807e-05	WBGene00012524	2.52113e-05	WBGene00010091	2.12955e-05	WBGene00015647	3.68976e-05	WBGene00016002	3.1421e-05
WBGene00014826	1.4242e-05	WBGene00022133	1.68315e-05	WBGene00021043	2.54353e-05	WBGene00002204	2.15494e-05	WBGene00008043	3.69173e-05	WBGene00009149	3.15054e-05
WBGene00022391	1.42452e-05	WBGene00019743	1.69688e-05	WBGene00012404	2.59503e-05	WBGene00194869	2.17769e-05	WBGene00001760	3.69852e-05	WBGene00009507	3.1671e-05
WBGene00010876	1.45442e-05	WBGene00009658	1.71995e-05	WBGene00000216	2.61546e-05	WBGene00018438	2.17956e-05	WBGene00020455	3.76001e-05	WBGene00011942	3.1759e-05
WBGene00000271	1.45702e-05	WBGene00018135	1.75381e-05	WBGene00018196	2.62531e-05	WBGene00018145	2.18631e-05	WBGene00005644	3.87451e-05	WBGene00016376	3.1833e-05
WBGene00003777	1.45718e-05	WBGene00008949	1.77738e-05	WBGene00007372	2.65776e-05	WBGene00077732	2.20054e-05	WBGene00010168	3.92718e-05	WBGene00005776	3.25071e-05
WBGene00004959	1.46723e-05	WBGene00019313	1.78617e-05	WBGene00009501	2.68907e-05	WBGene00013880	2.20293e-05	WBGene00020262	3.95084e-05	WBGene00018010	3.25775e-05
WBGene00003562	1.47338e-05	WBGene00012115	1.79032e-05	WBGene00015814	2.71459e-05	WBGene00013487	2.20605e-05	WBGene00015807	3.99174e-05	WBGene00012182	3.27308e-05
WBGene00009342	1.48134e-05	WBGene00019970	1.7907e-05	WBGene00009193	2.79076e-05	WBGene00016589	2.2691e-05	WBGene00019020	4.06259e-05	WBGene00004823	3.30417e-05
WBGene00004391	1.54278e-05	WBGene00009031	1.80314e-05	WBGene00010263	2.80408e-05	WBGene00004755	2.27789e-05	WBGene00013672	4.10298e-05	WBGene00045381	3.34931e-05
WBGene00017265	1.54502e-05	WBGene00013900	1.84477e-05	WBGene00194934	2.81827e-05	WBGene00015102	2.32282e-05	WBGene00005595	4.10561e-05	WBGene00021015	3.36062e-05
WBGene00006927	1.58838e-05	WBGene00000420	1.8534e-05	WBGene00018321	2.81836e-05	WBGene00008672	2.33224e-05	WBGene00019039	4.11245e-05	WBGene00015977	3.36102e-05
WBGene00009347	1.62081e-05	WBGene00021662	1.87046e-05	WBGene00007013	2.86899e-05	WBGene00003844	2.38438e-05	WBGene00012993	4.15024e-05	WBGene00014202	3.37717e-05
WBGene00000019	1.63327e-05	WBGene00016950	1.89097e-05	WBGene00003834	2.87206e-05	WBGene00013085	2.40137e-05	WBGene00012077	4.25845e-05	WBGene00007733	3.39588e-05
WBGene00000872	1.63503e-05	WBGene00004182	1.91324e-05	WBGene00013474	2.98433e-05	WBGene00011582	2.41542e-05	WBGene00013509	4.26501e-05	WBGene00014219	3.40008e-05
WBGene00012193	1.65412e-05	WBGene00013116	1.92944e-05	WBGene00012769	2.99926e-05	WBGene00003751	2.41597e-05	WBGene00008959	4.28578e-05	WBGene00022398	3.41296e-05
WBGene00018310	1.68629e-05	WBGene00003606	1.93247e-05	WBGene00020683	3.01942e-05	WBGene00022718	2.4731e-05	WBGene00015134	4.36008e-05	WBGene00011572	3.44475e-05
WBGene00014127	1.73461e-05	WBGene00000631	1.93252e-05	WBGene00010144	3.07757e-05	WBGene00001477	2.47677e-05	WBGene00000901	4.47827e-05	WBGene00008173	3.4854e-05
WBGene00006067	1.74421e-05	WBGene00018612	1.96687e-05	WBGene00015656	3.07996e-05	WBGene00012552	2.49126e-05	WBGene00077688	4.50357e-05	WBGene00017629	3.4865e-05
WBGene00019906	1.76344e-05	WBGene00018359	1.97821e-05	WBGene00017937	3.10657e-05	WBGene00194679	2.53982e-05	WBGene00010854	4.53216e-05	WBGene00013591	3.50032e-05
WBGene00022664	1.76816e-05	WBGene00044310	1.99187e-05	WBGene00007274	3.13756e-05	WBGene00001571	2.56028e-05	WBGene00004094	4.77214e-05	WBGene00019070	3.61341e-05
WBGene00007184	1.79084e-05	WBGene00012395	2.10092e-05	WBGene00017571	3.1468e-05	WBGene00008124	2.6024e-05	WBGene00008017	4.78039e-05	WBGene00013969	3.65738e-05
WBGene00015743	1.81054e-05	WBGene00009267	2.10188e-05	WBGene00009185	3.15244e-05	WBGene00022396	2.63651e-05	WBGene00219411	4.81151e-05	WBGene00009471	3.74364e-05
WBGene00010989	1.82021e-05	WBGene00000464	2.11023e-05	WBGene00003959	3.16124e-05	WBGene00009770	2.68889e-05	WBGene00020882	5.07072e-05	WBGene00001812	3.80075e-05
WBGene00011885	1.82079e-05	WBGene00001700	2.11043e-05	WBGene00016580	3.28149e-05	WBGene00007987	2.70552e-05	WBGene00021174	5.08447e-05	WBGene00016152	3.82096e-05
WBGene00004178	1.82893e-05	WBGene00011111	2.11882e-05	WBGene00010848	3.33434e-05	WBGene00008783	2.70647e-05	WBGene00004405	5.08448e-05	WBGene00002269	3.8447e-05
WBGene00010314	1.84887e-05	WBGene00005687	2.12051e-05	WBGene00011114	3.39868e-05	WBGene00012814	2.77448e-05	WBGene00019923	5.08802e-05	WBGene00008053	3.8452e-05
WBGene00011836	1.85822e-05	WBGene00003959	2.15246e-05	WBGene00017796	3.42075e-05	WBGene00012190	2.77482e-05	WBGene00018986	5.15528e-05	WBGene00012102	3.88296e-05
WBGene00016221	1.88948e-05	WBGene00009308	2.15681e-05	WBGene00002804	3.44204e-05	WBGene00016877	2.8016e-05	WBGene00012552	5.1746e-05	WBGene00015911	3.93937e-05
WBGene00001431	1.89528e-05	WBGene00004782	2.16035e-05	WBGene00020235	3.50096e-05	WBGene00004408	2.81432e-05	WBGene00006056	5.25023e-05	WBGene00004738	3.97307e-05
WBGene00004747	1.93903e-05	WBGene00002226	2.18943e-05	WBGene00009217	3.54047e-05	WBGene00005099	2.83021e-05	WBGene00019421	5.30637e-05	WBGene00003986	4.17893e-05
WBGene00009681	1.95504e-05	WBGene00020696	2.19321e-05	WBGene00015806	3.54213e-05	WBGene00020046	2.86085e-05	WBGene00015048	5.42489e-05	WBGene00015048	4.19576e-05
WBGene00011047	1.97526e-05	WBGene00001226	2.19517e-05	WBGene00020997	3.59304e-05	WBGene00013474	3.01718e-05	WBGene00020631	5.43492e-05	WBGene00009126	4.20023e-05
WBGene00019146	1.98894e-05	WBGene00020223	2.23569e-05	WBGene00001530	3.64098e-05	WBGene00014087	3.03584e-05	WBGene00011095	5.43521e-05	WBGene00012008	4.2189e-05
WBGene00001597	2.00232e-05	WBGene00000696	2.23965e-05	WBGene00007916	3.64525e-05	WBGene00000405	3.15729e-05	WBGene00016397	5.46536e-05	WBGene00009196	4.25611e-05
WBGene00022643	2.01543e-05	WBGene00000715	2.27673e-05	WBGene00010172	3.74097e-05	WBGene00007092	3.16459e-05	WBGene00015463	5.51258e-05	WBGene00011291	4.31959e-05
WBGene00001475	2.05834e-05	WBGene00003052	2.28205e-05	WBGene00013388	3.76699e-05	WBGene00011415	3.18592e-05	WBGene00015044	5.57325e-05	WBGene00016128	4.32058e-05
WBGene00022679	2.05983e-05	WBGene00014127	2.29496e-05	WBGene00010612	3.8286e-05	WBGene00303015	3.20377e-05	WBGene00011738	5.59254e-05	WBGene00001477	4.41899e-05
WBGene00022396	2.10618e-05	WBGene00000733	2.30679e-05	WBGene00001397	3.88198e-05	WBGene00001558	3.21201e-05	WBGene00017174	5.6566e-05	WBGene00000090	4.43094e-05
WBGene00007672	2.14009e-05	WBGene00009507	2.30763e-05	WBGene00000680	3.91315e-05	WBGene00008290	3.27873e-05	WBGene00000942	5.76453e-05	WBGene00011480	4.43718e-05
WBGene00008743	2.1987e-05	WBGene00018353	2.40323e-05	WBGene00018638	4.04464e-05	WBGene00015050	3.29961e-05	WBGene00018452	5.90425e-05	WBGene00011883	4.45748e-05
WBGene00016422	2.21268e-05	WBGene00018350	2.48081e-05	WBGene00019601	4.0958e-05	WBGene00010172	3.34459e-05	WBGene00003218	5.90464e-05	WBGene00009560	4.45959e-05
WBGene00010357	2.21773e-05	WBGene00013088	2.51231e-05	WBGene00008948	4.25498e-05	WBGene00019970	3.36456e-05	WBGene00016310	5.92407e-05	WBGene00013830	4.56442e-05
WBGene00002153	2.22789e-05	WBGene00015916	2.56041e-05	WBGene00017594	4.33185e-05	WBGene00021261	3.382e-05	WBGene00044512	5.98103e-05	WBGene00012323	4.67881e-05
WBGene00002036	2.24306e-05	WBGene00010380	2.56757e-05	WBGene00011480	4.44605e-05	WBGene00018959	3.40475e-05	WBGene00018445	5.98657e-05	WBGene00018698	4.69155e-05
WBGene00019966	2.26108e-05	WBGene00005837	2.57957e-05	WBGene00020326	4.46443e-05	WBGene00010144	3.43542e-05	WBGene00022262	6.07739e-05	WBGene00001475	4.69655e-05
WBGene00003775	2.26646e-05	WBGene00021011	2.66368e-05	WBGene00016376	4.47426e-05	WBGene00013116	3.43832e-05	WBGene00018042	6.17321e-05	WBGene00004114	4.70049e-05
WBGene00194916	2.28674e-05	WBGene00003979	2.68952e-05	WBGene00004408	4.4917e-05	WBGene00001090	3.52347e-05	WBGene00000250	6.17898e-05	WBGene00009583	4.79533e-05
WBGene00015061	2.32694e-05	WBGene00044623	2.706e-05	WBGene00044512	4.52361e-05	WBGene00022753	3.53832e-05	WBGene00010406	6.23339e-05	WBGene00003040	4.85183e-05
WBGene00008560	2.35486e-05	WBGene00000274	2.74482e-05	WBGene00011942	4.57204e-05	WBGene00012851	3.57945e-05	WBGene00016954	6.48796e-05	WBGene00022739	4.86263e-05
WBGene00022849	2.35517e-05	WBGene00009147	2.77506e-05	WBGene00022391	4.69134e-05	WBGene00003602	3.82596e-05	WBGene00194679	6.55139e-05	WBGene00007154	5.02364e-05
WBGene00020914	2.3562e-05	WBGene00020003	2.80456e-05	WBGene00008003	4.70407e-05	WBGene00000381	3.83281e-05	WBGene00022396	6.58611e-05	WBGene00004374	5.06538e-05
WBGene00001094	2.45332e-05	WBGene00012916	2.82882e-05	WBGene00020912	4.73529e-05	WBGene00011039	3.83679e-05	WBGene00011559	6.63158e-05	WBGene00009976	5.10537e-05
WBGene00000396	2.45556e-05	WBGene00010920	2.89274e-05	WBGene00022805	4.81952e-05	WBGene00303011	3.83921e-05	WBGene00000403	6.7713e-05	WBGene00017015	5.15797e-05
WBGene00019498	2.48151e-05	WBGene00021171	2.90627e-05	WBGene00020223	4.83449e-05	WBGene00007049	3.92397e-05	WBGene00018964	6.77588e-05	WBGene00014089	5.18952e-05
WBGene00001137	2.5836e-05	WBGene00000067	2.9264e-05	WBGene00011175	4.83981e-05	WBGene00016124	3.99127e-05	WBGene00018589	6.79929e-05	WBGene00005132	5.24777e-05
WBGene00009201	2.61686e-05	WBGene00021793	2.97025e-05	WBGene00006612	4.921e-05	WBGene00010300	4.16619e-05	WBGene00017991	6.82241e-05	WBGene00020375	5.30337e-05
WBGene00020035	2.61967e-05	WBGene00006678	3.02783e-05	WBGene00019769	4.95951e-05	WBGene00015650	4.24612e-05	WBGene00020267	6.93266e-05	WBGene00017292	5.38369e-05
WBGene00021343	2.73123e-05	WBGene00002985	3.04455e-05	WBGene00022739	4.9944e-05	WBGene00004458	4.40962e-05	WBGene00003727	6.93413e-05	WBGene00010686	5.49829e-05
WBGene00004782	2.75725e-05	WBGene00012803	3.07686e-05	WBGene00016507	5.01077e-05	WBGene00008220	4.41718e-05	WBGene00009383	7.01023e-05	WBGene00004945	5.50016e-05
WBGene00020948	2.75812e-05	WBGene00018020	3.08235e-05	WBGene00009122	5.03541e-05	WBGene00009031	4.46173e-05	WBGene00001748	7.24512e-05	WBGene00017968	5.66718e-05
WBGene00021118	2.76914e-05	WBGene00007778	3.11773e-05	WBGene00018310	5.10795e-05	WBGene00001080	4.49646e-05	WBGene00010300	7.27931e-05	WBGene00000986	5.72929e-05
WBGene00000107	2.77375e-05	WBGene00008290	3.11822e-05	WBGene00004319	5.12647e-05	WBGene00004157	4.51991e-05	WBGene00021690	7.28668e-05	WBGene00009285	5.7704e-05
WBGene00018042	2.77745e-05	WBGene00016094	3.19382e-05	WBGene00012343	5.30381e-05	WBGene00003827	4.57925e-05	WBGene00018021	7.29221e-05	WBGene00006814	5.98525e-05
WBGene00019085	2.81144e-05	WBGene00014158	3.22024e-05	WBGene00008874	5.40316e-05	WBGene00019540	4.64718e-05	WBGene00000746	7.62739e-05	WBGene00001829	6.04029e-05
WBGene00023425	2.83719e-05	WBGene00003058	3.246e-05	WBGene00009681	5.51738e-05	WBGene00002153	4.65823e-05	WBGene00013917	7.73354e-05	WBGene00004319	6.06683e-05
WBGene00017557	2.83898e-05	WBGene00018502	3.26284e-05	WBGene00011867	5.53948e-05	WBGene00009196	4.68967e-05	WBGene00018196	7.73959e-05	WBGene00022830	6.08956e-05
WBGene00002276	2.86585e-05	WBGene00019461	3.27115e-05	WBGene00019617	5.59211e-05	WBGene00019421	4.76866e-05	WBGene00011249	7.74009e-05	WBGene00007150	6.12265e-05
WBGene00020702	2.93037e-05	WBGene00003701	3.337e-05	WBGene00000715	5.5966e-05	WBGene00002010	4.79602e-05	WBGene00011348	7.74377e-05	WBGene00003961	6.1283e-05
WBGene00015235	2.94567e-05	WBGene00013489	3.36056e-05	WBGene00000741	5.60037e-05	WBGene00000113	4.84882e-05	WBGene00011635	7.86408e-05	WBGene00000933	6.17987e-05
WBGene00009070	2.95256e-05	WBGene00005227	3.36225e-05	WBGene00016398	5.67982e-05	WBGene00013801	4.87251e-05	WBGene00011777	7.95225e-05	WBGene00022714	6.21675e-05
WBGene00007247	2.98196e-05	WBGene00021960	3.40757e-05	WBGene00010690	5.78268e-05	WBGene00018394	4.88344e-05	WBGene00004004	8.0151e-05	WBGene00009267	6.28612e-05
WBGene00002583	3.07942e-05	WBGene00012482	3.44942e-05	WBGene00019509	5.79612e-05	WBGene00001538	4.94498e-05	WBGene00016807	8.09842e-05	WBGene00016877	6.29226e-05
WBGene00008654	3.10979e-05	WBGene00018712	3.46706e-05	WBGene00013247	5.81882e-05	WBGene00004333	4.96344e-05	WBGene00000675	8.11746e-05	WBGene00019204	6.3614e-05
WBGene00010677	3.11376e-05	WBGene00016453	3.49396e-05	WBGene00016785	5.85104e-05	WBGene00017918	4.96927e-05	WBGene00045271	8.27099e-05	WBGene00007588	6.50126e-05
WBGene00017163	3.13126e-05	WBGene00014197	3.57284e-05	WBGene00006941	5.88752e-05	WBGene00019451	5.00229e-05	WBGene00008529	8.29499e-05	WBGene00016580	6.81614e-05
WBGene00022800	3.13188e-05	WBGene00021981	3.60704e-05	WBGene00018563	5.89353e-05	WBGene00001839	5.04144e-05	WBGene00005607	8.32739e-05	WBGene00011290	6.90687e-05
WBGene00014098	3.1532e-05	WBGene00022696	3.713e-05	WBGene00022718	5.97928e-05	WBGene00001490	5.06522e-05	WBGene00018637	8.45525e-05	WBGene00009259	6.98792e-05
WBGene00010647	3.15648e-05	WBGene00006529	3.86408e-05	WBGene00011559	6.06479e-05	WBGene00006465	5.12092e-05	WBGene00012915	8.48622e-05	WBGene00015754	7.00883e-05
WBGene00003936	3.1693e-05	WBGene00016995	3.87712e-05	WBGene00019020	6.12338e-05	WBGene00019064	5.17755e-05	WBGene00011644	8.57405e-05	WBGene00018019	7.01746e-05
WBGene00012096	3.20412e-05	WBGene00013880	3.88852e-05	WBGene00022389	6.12636e-05	WBGene00001058	5.2667e-05	WBGene00006831	8.64301e-05	WBGene00017797	7.06366e-05
WBGene00012595	3.2296e-05	WBGene00010821	3.90023e-05	WBGene00013476	6.22e-05	WBGene00023425	5.34472e-05	WBGene00015578	8.70828e-05	WBGene00009166	7.22361e-05
WBGene00004405	3.23719e-05	WBGene00018491	3.9327e-05	WBGene00006147	6.34743e-05	WBGene00014004	5.3537e-05	WBGene00017555	8.74413e-05	WBGene00015206	7.24839e-05
WBGene00005099	3.24638e-05	WBGene00015361	3.97719e-05	WBGene00009285	6.39376e-05	WBGene00010883	5.37967e-05	WBGene00004038	8.76364e-05	WBGene00017557	7.3824e-05
WBGene00003165	3.27258e-05	WBGene00002228	3.98793e-05	WBGene00000378	6.42269e-05	WBGene00002083	5.39235e-05	WBGene00017071	8.78283e-05	WBGene00017085	7.39227e-05
WBGene00020704	3.28504e-05	WBGene00019508	4.01978e-05	WBGene00005015	6.42346e-05	WBGene00003091	5.44688e-05	WBGene00008413	8.95646e-05	WBGene00017608	7.52829e-05
WBGene00001281	3.30125e-05	WBGene00003610	4.02863e-05	WBGene00020046	6.54535e-05	WBGene00017606	5.45006e-05	WBGene00001616	8.96987e-05	WBGene00008882	7.5307e-05
WBGene00000163	3.3398e-05	WBGene00011431	4.11942e-05	WBGene00009560	6.54712e-05	WBGene00020290	5.5118e-05	WBGene00019877	9.05374e-05	WBGene00016533	7.55564e-05
WBGene00007401	3.39122e-05	WBGene00012011	4.1365e-05	WBGene00004254	6.61248e-05	WBGene00015511	5.52705e-05	WBGene00009117	9.25582e-05	WBGene00006414	7.6103e-05
WBGene00019503	3.39764e-05	WBGene00002033	4.17964e-05	WBGene00000831	6.80186e-05	WBGene00021627	5.53183e-05	WBGene00004424	9.58829e-05	WBGene00022803	7.68729e-05
WBGene00018455	3.4671e-05	WBGene00003154	4.22785e-05	WBGene00007792	6.88721e-05	WBGene00003959	5.65337e-05	WBGene00008105	9.71504e-05	WBGene00013220	7.7559e-05
WBGene00001135	3.47398e-05	WBGene00016124	4.32104e-05	WBGene00000942	6.90623e-05	WBGene00022767	5.67504e-05	WBGene00021397	9.76231e-05	WBGene00022500	7.78133e-05
WBGene00019970	3.4845e-05	WBGene00015306	4.35568e-05	WBGene00000418	7.09857e-05	WBGene00001412	5.952e-05	WBGene00008280	9.97824e-05	WBGene00007049	7.90422e-05
WBGene00001546	3.4912e-05	WBGene00077519	4.4292e-05	WBGene00000705	7.17491e-05	WBGene00018696	5.97877e-05	WBGene00006773	0.000101094	WBGene00020659	7.94698e-05
WBGene00021171	3.50507e-05	WBGene00044989	4.46974e-05	WBGene00007484	7.18367e-05	WBGene00011959	6.01962e-05	WBGene00018073	0.000101158	WBGene00003635	7.95103e-05
WBGene00009772	3.51097e-05	WBGene00044299	4.4884e-05	WBGene00011994	7.57756e-05	WBGene00010670	6.03786e-05	WBGene00016971	0.000101326	WBGene00019018	8.10266e-05
WBGene00011444	3.56296e-05	WBGene00014151	4.54581e-05	WBGene00019064	7.73005e-05	WBGene00016495	6.07088e-05	WBGene00005643	0.000104187	WBGene00018418	8.14159e-05
WBGene00006164	3.60998e-05	WBGene00001480	4.55072e-05	WBGene00002008	7.76806e-05	WBGene00009646	6.16297e-05	WBGene00003036	0.000104301	WBGene00007917	8.15517e-05
WBGene00002889	3.64167e-05	WBGene00018318	4.58535e-05	WBGene00004313	7.77573e-05	WBGene00018712	6.30668e-05	WBGene00000079	0.000105476	WBGene00021465	8.27657e-05
WBGene00020022	3.71999e-05	WBGene00013242	4.60607e-05	WBGene00011214	7.91626e-05	WBGene00001093	6.36349e-05	WBGene00015113	0.000105752	WBGene00012109	8.35095e-05
WBGene00008945	3.73252e-05	WBGene00001558	4.77263e-05	WBGene00003751	7.95195e-05	WBGene00016678	6.44604e-05	WBGene00010268	0.000105936	WBGene00006603	8.39333e-05
WBGene00019608	3.74342e-05	WBGene00000553	4.7889e-05	WBGene00001007	8.23071e-05	WBGene00020262	6.46064e-05	WBGene00022631	0.000106186	WBGene00002206	8.42508e-05
WBGene00013036	3.82971e-05	WBGene00014098	4.79266e-05	WBGene00020113	8.38528e-05	WBGene00001581	6.48623e-05	WBGene00008586	0.000107642	WBGene00007795	8.42726e-05
WBGene00000771	3.85719e-05	WBGene00005934	4.82941e-05	WBGene00020328	8.40022e-05	WBGene00012198	6.57644e-05	WBGene00019812	0.000108182	WBGene00006351	8.42801e-05
WBGene00003816	3.95437e-05	WBGene00000771	4.83134e-05	WBGene00021448	8.49476e-05	WBGene00009514	6.68212e-05	WBGene00009539	0.000108709	WBGene00000202	8.59618e-05
WBGene00015398	3.97471e-05	WBGene00011910	4.89853e-05	WBGene00007292	8.55344e-05	WBGene00006571	6.68839e-05	WBGene00004800	0.000108925	WBGene00001602	8.66534e-05
WBGene00010013	3.98988e-05	WBGene00019421	4.92222e-05	WBGene00018318	8.6381e-05	WBGene00010524	6.82233e-05	WBGene00019530	0.000109321	WBGene00000041	8.68067e-05
WBGene00002206	3.99838e-05	WBGene00007446	4.99419e-05	WBGene00043743	8.65149e-05	WBGene00015909	6.95396e-05	WBGene00003598	0.000109404	WBGene00016551	8.69315e-05
WBGene00016239	4.01559e-05	WBGene00004110	5.10277e-05	WBGene00012890	8.66806e-05	WBGene00021336	7.04742e-05	WBGene00018933	0.00011038	WBGene00008238	8.70543e-05
WBGene00011658	4.02859e-05	WBGene00014097	5.20047e-05	WBGene00017354	8.66888e-05	WBGene00018954	7.24491e-05	WBGene00004858	0.000111649	WBGene00017951	8.7362e-05
WBGene00012388	4.06871e-05	WBGene00013189	5.27134e-05	WBGene00016427	8.69744e-05	WBGene00013786	7.30482e-05	WBGene00013247	0.000113034	WBGene00018145	8.87409e-05
WBGene00003026	4.11349e-05	WBGene00010526	5.28623e-05	WBGene00017923	8.74314e-05	WBGene00016824	7.31733e-05	WBGene00020748	0.000114095	WBGene00021192	9.00422e-05
WBGene00001621	4.1209e-05	WBGene00010670	5.31544e-05	WBGene00001137	9.0154e-05	WBGene00016837	7.40537e-05	WBGene00007073	0.00011626	WBGene00002152	9.07684e-05
WBGene00006483	4.21906e-05	WBGene00017620	5.38305e-05	WBGene00008005	9.06949e-05	WBGene00021098	7.44898e-05	WBGene00008956	0.000117358	WBGene00045419	9.10036e-05
WBGene00005826	4.26721e-05	WBGene00003534	5.39256e-05	WBGene00002368	9.07213e-05	WBGene00003613	7.50147e-05	WBGene00018948	0.000117982	WBGene00011589	9.11301e-05
WBGene00005177	4.30381e-05	WBGene00017629	5.3993e-05	WBGene00009865	9.28037e-05	WBGene00017354	7.51767e-05	WBGene00021340	0.000118327	WBGene00020546	9.22625e-05
WBGene00013452	4.4928e-05	WBGene00022832	5.4215e-05	WBGene00010989	9.4451e-05	WBGene00016049	7.68215e-05	WBGene00011364	0.000119266	WBGene00000732	9.25852e-05
WBGene00004392	4.49543e-05	WBGene00009578	5.46313e-05	WBGene00002050	9.51554e-05	WBGene00009502	7.9785e-05	WBGene00004342	0.000122475	WBGene00017071	9.31833e-05
WBGene00008290	4.50909e-05	WBGene00077732	5.47397e-05	WBGene00000482	9.58482e-05	WBGene00020326	7.99392e-05	WBGene00004156	0.00012305	WBGene00020455	9.36831e-05
WBGene00018398	4.51856e-05	WBGene00013252	5.51453e-05	WBGene00010659	9.59117e-05	WBGene00016680	7.99475e-05	WBGene00002368	0.000124782	WBGene00015481	9.38525e-05
WBGene00011261	4.5828e-05	WBGene00017685	5.52261e-05	WBGene00009394	9.86586e-05	WBGene00021468	8.16576e-05	WBGene00194704	0.00012623	WBGene00005108	9.44806e-05
WBGene00016170	4.61258e-05	WBGene00020559	5.56726e-05	WBGene00007825	9.91747e-05	WBGene00015183	8.2692e-05	WBGene00021877	0.000126245	WBGene00019953	9.45911e-05
WBGene00020788	4.61673e-05	WBGene00020700	5.5863e-05	WBGene00044797	9.93855e-05	WBGene00008950	8.27413e-05	WBGene00020407	0.000126833	WBGene00019451	9.56265e-05
WBGene00021713	4.66152e-05	WBGene00011674	5.59854e-05	WBGene00011572	0.00010234	WBGene00017416	8.3418e-05	WBGene00013252	0.000127796	WBGene00014218	9.6015e-05
WBGene00017179	4.73431e-05	WBGene00020491	5.68863e-05	WBGene00002046	0.000103918	WBGene00010926	8.37636e-05	WBGene00003064	0.000129845	WBGene00003605	9.71391e-05
WBGene00002368	4.78014e-05	WBGene00014165	5.74386e-05	WBGene00018039	0.000104523	WBGene00020042	8.57249e-05	WBGene00000718	0.000131747	WBGene00001603	9.7977e-05
WBGene00012608	4.86138e-05	WBGene00011436	5.82065e-05	WBGene00008506	0.000105053	WBGene00011687	8.6026e-05	WBGene00000474	0.000132432	WBGene00012077	9.82344e-05
WBGene00007425	4.88066e-05	WBGene00011432	5.82494e-05	WBGene00019913	0.000105451	WBGene00007448	8.73334e-05	WBGene00003905	0.000133439	WBGene00021370	9.98167e-05
WBGene00005925	4.92022e-05	WBGene00017590	5.88998e-05	WBGene00007384	0.000105619	WBGene00016660	8.99649e-05	WBGene00011739	0.000134749	WBGene00014179	0.000100399
WBGene00002047	4.92473e-05	WBGene00007746	5.89888e-05	WBGene00021057	0.000106264	WBGene00017796	9.02788e-05	WBGene00020915	0.000136216	WBGene00007384	0.000100455
WBGene00007072	4.95017e-05	WBGene00011590	5.9513e-05	WBGene00004042	0.00010665	WBGene00004319	9.28948e-05	WBGene00015660	0.000138161	WBGene00011328	0.000101623
WBGene00000378	4.9755e-05	WBGene00017975	6.06396e-05	WBGene00303030	0.000106876	WBGene00001102	9.29546e-05	WBGene00019783	0.000139454	WBGene00019901	0.00010378
WBGene00000625	5.02567e-05	WBGene00020329	6.07111e-05	WBGene00021793	0.000106957	WBGene00010478	9.41141e-05	WBGene00235327	0.000144175	WBGene00044149	0.000104128
WBGene00012814	5.08024e-05	WBGene00017875	6.1782e-05	WBGene00003844	0.000108705	WBGene00044512	9.54074e-05	WBGene00013859	0.000146171	WBGene00008568	0.000104448
WBGene00010621	5.08602e-05	WBGene00019044	6.18276e-05	WBGene00021538	0.000109179	WBGene00004123	9.57563e-05	WBGene00008272	0.000146398	WBGene00013963	0.00010505
WBGene00007802	5.12095e-05	WBGene00007920	6.28702e-05	WBGene00007987	0.000109443	WBGene00019963	9.57996e-05	WBGene00001546	0.000148284	WBGene00011505	0.000105431
WBGene00019949	5.12606e-05	WBGene00000710	6.29511e-05	WBGene00013156	0.000111982	WBGene00013476	9.65373e-05	WBGene00004006	0.000148359	WBGene00006359	0.000105897
WBGene00015407	5.17533e-05	WBGene00009422	6.30948e-05	WBGene00022742	0.000113034	WBGene00015214	9.6572e-05	WBGene00019124	0.000150025	WBGene00016453	0.000107068
WBGene00002225	5.19898e-05	WBGene00001599	6.34883e-05	WBGene00018696	0.000113722	WBGene00021144	9.66056e-05	WBGene00010641	0.000151106	WBGene00014250	0.00010807
WBGene00018072	5.26217e-05	WBGene00000680	6.35424e-05	WBGene00017487	0.000115014	WBGene00022307	9.77536e-05	WBGene00010357	0.000152144	WBGene00006306	0.000110485
WBGene00019216	5.31076e-05	WBGene00017843	6.36713e-05	WBGene00019508	0.000116039	WBGene00011480	9.79853e-05	WBGene00017795	0.000153193	WBGene00014113	0.00011072
WBGene00000040	5.36837e-05	WBGene00001440	6.41883e-05	WBGene00010883	0.00011705	WBGene00001263	9.79891e-05	WBGene00001591	0.000155395	WBGene00016495	0.000113054
WBGene00010906	5.39322e-05	WBGene00012933	6.49968e-05	WBGene00015143	0.000117267	WBGene00021751	9.85647e-05	WBGene00019273	0.000156284	WBGene00003888	0.000115495
WBGene00013830	5.45001e-05	WBGene00016517	6.55223e-05	WBGene00009334	0.000117325	WBGene00019796	9.88708e-05	WBGene00002026	0.000156749	WBGene00000214	0.000115598
WBGene00012836	5.51876e-05	WBGene00011546	6.59251e-05	WBGene00019017	0.000117907	WBGene00013811	0.000100366	WBGene00000732	0.000157571	WBGene00010239	0.00011603
WBGene00020546	5.54836e-05	WBGene00010988	6.60862e-05	WBGene00008074	0.000118453	WBGene00019890	0.000100482	WBGene00013878	0.000157813	WBGene00011529	0.000119855
WBGene00020580	5.6091e-05	WBGene00011529	6.6859e-05	WBGene00000830	0.000120171	WBGene00001692	0.000100527	WBGene00019085	0.000158543	WBGene00000253	0.00012
WBGene00003701	5.63846e-05	WBGene00017951	6.8622e-05	WBGene00018438	0.000123389	WBGene00015739	0.0001008	WBGene00011250	0.000159113	WBGene00020580	0.000120181
WBGene00019917	5.7616e-05	WBGene00021048	6.9176e-05	WBGene00021837	0.00012543	WBGene00020505	0.000101461	WBGene00001358	0.000160788	WBGene00014101	0.000120626
WBGene00001480	5.90939e-05	WBGene00010182	7.11698e-05	WBGene00000405	0.000126849	WBGene00018849	0.000101584	WBGene00006952	0.00016296	WBGene00012096	0.000120954
WBGene00009884	5.97149e-05	WBGene00000717	7.16118e-05	WBGene00008950	0.000127414	WBGene00007209	0.000102031	WBGene00016732	0.000163666	WBGene00017594	0.000121409
WBGene00017620	6.04929e-05	WBGene00010088	7.16942e-05	WBGene00044989	0.000129029	WBGene00010448	0.00010269	WBGene00010091	0.000168157	WBGene00003165	0.00012155
WBGene00019077	6.0707e-05	WBGene00001076	7.19971e-05	WBGene00020007	0.000130217	WBGene00007736	0.000104756	WBGene00000375	0.000168851	WBGene00018156	0.000121875
WBGene00004951	6.08115e-05	WBGene00013247	7.22253e-05	WBGene00018203	0.000132971	WBGene00009539	0.000105459	WBGene00000977	0.000169678	WBGene00006961	0.000122137
WBGene00015156	6.25462e-05	WBGene00001714	7.24764e-05	WBGene00016847	0.000133689	WBGene00013741	0.000106726	WBGene00001993	0.000173047	WBGene00011191	0.000123011
WBGene00000666	6.26747e-05	WBGene00008005	7.31115e-05	WBGene00020505	0.000134811	WBGene00007611	0.000109088	WBGene00016185	0.000173806	WBGene00010768	0.000123275
WBGene00008274	6.31761e-05	WBGene00020546	7.32439e-05	WBGene00022396	0.000135159	WBGene00008898	0.000110641	WBGene00005257	0.000174463	WBGene00022467	0.000123411
WBGene00010285	6.33666e-05	WBGene00015116	7.47626e-05	WBGene00006414	0.000135331	WBGene00012502	0.000110716	WBGene00020202	0.000174555	WBGene00008508	0.000125526
WBGene00000667	6.37014e-05	WBGene00009241	7.50728e-05	WBGene00011951	0.000137355	WBGene00006568	0.000112336	WBGene00020382	0.000176371	WBGene00010740	0.00012639
WBGene00000712	6.3717e-05	WBGene00044674	7.50979e-05	WBGene00001621	0.000138194	WBGene00005106	0.000115555	WBGene00011958	0.000176462	WBGene00011575	0.000127578
WBGene00001571	6.49577e-05	WBGene00008326	7.59834e-05	WBGene00017930	0.00014123	WBGene00015366	0.000115604	WBGene00015984	0.000178651	WBGene00019259	0.000128755
WBGene00015048	6.52051e-05	WBGene00009184	7.7086e-05	WBGene00007969	0.000141868	WBGene00008005	0.000115975	WBGene00004346	0.000182287	WBGene00001398	0.000129197
WBGene00017920	6.64375e-05	WBGene00004422	7.77829e-05	WBGene00017163	0.000142785	WBGene00004700	0.000117192	WBGene00000737	0.000182508	WBGene00003497	0.000130113
WBGene00008410	6.68869e-05	WBGene00003816	7.8368e-05	WBGene00022253	0.000144459	WBGene00011575	0.000117952	WBGene00020046	0.000182613	WBGene00007053	0.000130622
WBGene00006902	6.78225e-05	WBGene00011318	7.84253e-05	WBGene00013868	0.000145829	WBGene00000732	0.000118173	WBGene00022632	0.000183392	WBGene00019216	0.00013089
WBGene00009123	6.79041e-05	WBGene00004755	7.86371e-05	WBGene00016485	0.000146224	WBGene00013868	0.000120489	WBGene00009138	0.00018454	WBGene00013086	0.000130999
WBGene00303015	6.80201e-05	WBGene00018740	7.97562e-05	WBGene00000897	0.000146318	WBGene00002206	0.000121558	WBGene00017766	0.000185422	WBGene00019968	0.000131002
WBGene00016128	6.8038e-05	WBGene00007829	8.08652e-05	WBGene00013801	0.00014738	WBGene00002200	0.000122471	WBGene00017948	0.000185899	WBGene00001978	0.000131963
WBGene00006768	6.82895e-05	WBGene00020276	8.13057e-05	WBGene00001477	0.000147589	WBGene00001016	0.000123172	WBGene00000934	0.000187782	WBGene00001598	0.000132243
WBGene00020700	6.9753e-05	WBGene00017769	8.15817e-05	WBGene00000251	0.000148505	WBGene00006598	0.000127946	WBGene00009571	0.000189237	WBGene00013622	0.000132386
WBGene00020592	6.99323e-05	WBGene00000214	8.23972e-05	WBGene00000366	0.000149036	WBGene00000781	0.000128848	WBGene00020567	0.000190601	WBGene00009368	0.000132815
WBGene00016889	7.0066e-05	WBGene00001099	8.24948e-05	WBGene00010419	0.000154028	WBGene00004904	0.000131479	WBGene00005925	0.000192252	WBGene00007184	0.000132988
WBGene00010848	7.01793e-05	WBGene00009347	8.29719e-05	WBGene00013463	0.000154943	WBGene00006518	0.000132164	WBGene00010486	0.000192804	WBGene00001625	0.000134961
WBGene00021316	7.04436e-05	WBGene00003090	8.31683e-05	WBGene00019232	0.000155336	WBGene00016970	0.000132654	WBGene00020546	0.000196528	WBGene00016517	0.000135124
WBGene00005022	7.06532e-05	WBGene00009306	8.33918e-05	WBGene00004204	0.000156679	WBGene00002368	0.000132955	WBGene00016939	0.000198216	WBGene00013700	0.00013608
WBGene00010035	7.09989e-05	WBGene00010263	8.38621e-05	WBGene00007787	0.000157192	WBGene00006824	0.000133047	WBGene00018184	0.000198531	WBGene00016014	0.000137672
WBGene00009166	7.11856e-05	WBGene00001233	8.39752e-05	WBGene00020406	0.000157314	WBGene00011950	0.000133455	WBGene00006110	0.00019918	WBGene00007042	0.000137752
WBGene00004256	7.12846e-05	WBGene00018140	8.4457e-05	WBGene00013771	0.000158213	WBGene00018646	0.000133649	WBGene00008340	0.000199841	WBGene00022696	0.000137799
WBGene00008627	7.18452e-05	WBGene00044655	8.48692e-05	WBGene00009212	0.000158428	WBGene00009365	0.000134078	WBGene00008560	0.000202424	WBGene00003922	0.000140173
WBGene00015391	7.2322e-05	WBGene00018810	8.49096e-05	WBGene00077732	0.000159473	WBGene00019688	0.00013606	WBGene00011959	0.000202608	WBGene00016215	0.000140488
WBGene00007297	7.28106e-05	WBGene00009772	8.51808e-05	WBGene00003877	0.000161862	WBGene00014117	0.000137772	WBGene00008150	0.000202722	WBGene00020128	0.000141157
WBGene00004904	7.35908e-05	WBGene00017758	8.55776e-05	WBGene00022712	0.000162426	WBGene00002067	0.000141362	WBGene00009007	0.000203341	WBGene00021577	0.000143398
WBGene00010626	7.38004e-05	WBGene00044333	8.55922e-05	WBGene00001093	0.000162979	WBGene00001001	0.00014238	WBGene00016019	0.000203607	WBGene00000737	0.000146522
WBGene00000254	7.39165e-05	WBGene00021303	8.74135e-05	WBGene00015214	0.000164124	WBGene00018348	0.00014357	WBGene00016128	0.000203674	WBGene00016006	0.00014704
WBGene00020840	7.4893e-05	WBGene00017851	8.74165e-05	WBGene00018698	0.000165837	WBGene00020912	0.000144475	WBGene00000381	0.000203712	WBGene00020700	0.000147825
WBGene00000240	7.54274e-05	WBGene00015073	8.78267e-05	WBGene00020025	0.000165892	WBGene00008016	0.000145278	WBGene00000951	0.000204365	WBGene00001689	0.000151073
WBGene00002005	7.59794e-05	WBGene00015492	8.79526e-05	WBGene00015996	0.000166352	WBGene00011650	0.000146469	WBGene00012100	0.000205917	WBGene00003633	0.000151958
WBGene00016960	7.61061e-05	WBGene00007053	8.87001e-05	WBGene00011337	0.000171998	WBGene00219411	0.000146879	WBGene00013904	0.000207114	WBGene00206487	0.00015374
WBGene00022315	7.82481e-05	WBGene00004405	8.91945e-05	WBGene00022295	0.000174688	WBGene00019966	0.000146911	WBGene00005844	0.000209747	WBGene00000453	0.000154763
WBGene00011572	7.83779e-05	WBGene00000224	8.92619e-05	WBGene00006240	0.00017514	WBGene00077769	0.000147664	WBGene00005050	0.000210187	WBGene00020442	0.000154852
WBGene00011431	7.84409e-05	WBGene00011808	8.99989e-05	WBGene00018455	0.000175637	WBGene00007384	0.000147885	WBGene00014193	0.000212666	WBGene00013904	0.000154965
WBGene00022890	7.91664e-05	WBGene00006550	9.08329e-05	WBGene00077607	0.000180109	WBGene00002227	0.000147956	WBGene00044795	0.000212805	WBGene00008740	0.00015534
WBGene00008546	7.94447e-05	WBGene00013085	9.1504e-05	WBGene00006734	0.000181197	WBGene00018318	0.000151727	WBGene00020153	0.000213393	WBGene00011382	0.000156593
WBGene00022767	7.98811e-05	WBGene00043702	9.20098e-05	WBGene00020442	0.00018527	WBGene00018698	0.000152202	WBGene00003680	0.00021748	WBGene00010369	0.000157407
WBGene00019901	7.99537e-05	WBGene00013855	9.22649e-05	WBGene00020273	0.000186903	WBGene00021730	0.000152412	WBGene00021700	0.00021774	WBGene00022805	0.000158823
WBGene00017968	8.00542e-05	WBGene00008033	9.26023e-05	WBGene00009070	0.000190552	WBGene00022060	0.000153308	WBGene00000407	0.000219441	WBGene00018135	0.000160086
WBGene00007943	8.25066e-05	WBGene00012332	9.33129e-05	WBGene00007209	0.000190849	WBGene00013093	0.000153528	WBGene00009401	0.000221164	WBGene00016983	0.000161518
WBGene00001057	8.31332e-05	WBGene00015381	9.4174e-05	WBGene00007986	0.000193451	WBGene00044109	0.000153866	WBGene00004880	0.00022273	WBGene00005687	0.00016236
WBGene00016561	8.34914e-05	WBGene00018051	9.52042e-05	WBGene00015467	0.000193643	WBGene00019449	0.0001542	WBGene00005655	0.000223693	WBGene00020558	0.000162684
WBGene00000833	8.53159e-05	WBGene00019037	9.52539e-05	WBGene00009153	0.000194758	WBGene00006926	0.000154435	WBGene00005826	0.000223999	WBGene00003156	0.000163612
WBGene00006928	8.54762e-05	WBGene00008472	9.65085e-05	WBGene00011202	0.00019573	WBGene00001539	0.000155368	WBGene00013030	0.000226223	WBGene00006996	0.000163974
WBGene00001607	8.66461e-05	WBGene00007520	9.75344e-05	WBGene00006040	0.000196571	WBGene00010621	0.000157977	WBGene00015759	0.000227784	WBGene00014015	0.000164926
WBGene00010053	8.75442e-05	WBGene00017411	9.76959e-05	WBGene00003613	0.000199271	WBGene00021082	0.000158265	WBGene00044811	0.000228544	WBGene00018290	0.000166454
WBGene00000680	8.84222e-05	WBGene00004387	9.82871e-05	WBGene00013785	0.000203153	WBGene00022742	0.000159657	WBGene00044265	0.000228632	WBGene00001651	0.00016899
WBGene00020997	8.96217e-05	WBGene00021627	9.87027e-05	WBGene00001607	0.00020586	WBGene00022500	0.000161195	WBGene00001586	0.000230718	WBGene00044476	0.000169687
WBGene00018060	8.99243e-05	WBGene00003530	9.87576e-05	WBGene00018712	0.000206096	WBGene00015783	0.000162412	WBGene00021116	0.000234502	WBGene00011932	0.000169707
WBGene00011942	9.07023e-05	WBGene00194733	9.94671e-05	WBGene00235368	0.000206723	WBGene00021282	0.000163978	WBGene00009976	0.00023543	WBGene00021171	0.000170036
WBGene00008882	9.07573e-05	WBGene00000722	9.98285e-05	WBGene00018424	0.000208031	WBGene00022890	0.000165153	WBGene00020927	0.00023641	WBGene00011241	0.000170119
WBGene00020007	9.10187e-05	WBGene00005999	0.0001006	WBGene00019783	0.000209805	WBGene00010847	0.000167252	WBGene00017710	0.000238216	WBGene00022849	0.000171135
WBGene00007488	9.11767e-05	WBGene00016354	0.000101044	WBGene00009143	0.000216475	WBGene00010977	0.000168691	WBGene00009726	0.000238306	WBGene00009123	0.000172582
WBGene00001580	9.12697e-05	WBGene00194715	0.000101231	WBGene00020805	0.00021869	WBGene00004827	0.000170503	WBGene00019540	0.000238326	WBGene00020030	0.000174934
WBGene00003883	9.20527e-05	WBGene00019923	0.000101541	WBGene00014004	0.000220418	WBGene00004698	0.000171479	WBGene00020763	0.000239306	WBGene00010476	0.000175202
WBGene00018252	9.21322e-05	WBGene00006600	0.000101655	WBGene00016671	0.000221436	WBGene00019765	0.000172165	WBGene00001835	0.000241335	WBGene00015024	0.000178662
WBGene00022876	9.26937e-05	WBGene00018252	0.000101822	WBGene00003955	0.000223183	WBGene00013716	0.000172166	WBGene00013944	0.000242322	WBGene00015578	0.000179333
WBGene00001569	9.30799e-05	WBGene00001692	0.000102172	WBGene00001029	0.000223803	WBGene00011114	0.000173655	WBGene00019646	0.000242621	WBGene00206519	0.000184058
WBGene00007352	9.32016e-05	WBGene00016836	0.000102239	WBGene00017873	0.000224276	WBGene00007015	0.000174857	WBGene00009663	0.000242679	WBGene00003532	0.000184421
WBGene00012768	9.3297e-05	WBGene00004925	0.000103474	WBGene00010478	0.000225802	WBGene00019509	0.000178337	WBGene00304195	0.000242743	WBGene00010900	0.00018525
WBGene00021465	9.54769e-05	WBGene00016194	0.000105062	WBGene00009154	0.000228946	WBGene00012375	0.000182177	WBGene00018115	0.000243199	WBGene00020169	0.000185992
WBGene00013252	9.68682e-05	WBGene00017853	0.000105868	WBGene00020455	0.000229844	WBGene00019496	0.000183735	WBGene00009814	0.000243199	WBGene00015329	0.000186394
WBGene00003485	9.71217e-05	WBGene00016781	0.00010622	WBGene00023425	0.000230571	WBGene00022801	0.000188589	WBGene00017164	0.000243717	WBGene00004143	0.000187735
WBGene00004244	9.77085e-05	WBGene00019997	0.000107476	WBGene00004388	0.000232623	WBGene00018669	0.000188991	WBGene00016155	0.000246288	WBGene00005334	0.00018813
WBGene00000551	9.85148e-05	WBGene00019794	0.000108773	WBGene00005596	0.000234911	WBGene00018839	0.000190463	WBGene00005009	0.00024709	WBGene00006656	0.00019006
WBGene00000460	9.85975e-05	WBGene00020771	0.000110687	WBGene00002262	0.00023928	WBGene00000366	0.000193512	WBGene00012952	0.000248803	WBGene00003844	0.00019273
WBGene00011657	9.94111e-05	WBGene00045302	0.000112542	WBGene00011039	0.000240457	WBGene00022679	0.000197241	WBGene00044047	0.000249671	WBGene00004955	0.000196796
WBGene00001187	9.96369e-05	WBGene00001754	0.000113554	WBGene00019264	0.00024575	WBGene00194934	0.000200426	WBGene00009350	0.000251275	WBGene00011488	0.00019744
WBGene00012952	0.0001002	WBGene00007795	0.000113854	WBGene00012190	0.000245792	WBGene00018711	0.00020152	WBGene00005891	0.000253013	WBGene00008654	0.000197884
WBGene00000453	0.000101237	WBGene00011328	0.000114469	WBGene00015326	0.000246	WBGene00022467	0.000202944	WBGene00007900	0.000256936	WBGene00011910	0.000199718
WBGene00018433	0.000102638	WBGene00015305	0.000115075	WBGene00013811	0.000246983	WBGene00004740	0.000202962	WBGene00015809	0.000257752	WBGene00000254	0.000199737
WBGene00002050	0.000103422	WBGene00007049	0.000115219	WBGene00010719	0.000247826	WBGene00015492	0.000205331	WBGene00019022	0.000258541	WBGene00009499	0.000201227
WBGene00006237	0.000103673	WBGene00022709	0.000115394	WBGene00000669	0.000248936	WBGene00004156	0.000205548	WBGene00009507	0.000259857	WBGene00015306	0.000202076
WBGene00014117	0.000104459	WBGene00020289	0.000116128	WBGene00010647	0.00025204	WBGene00021316	0.000208254	WBGene00020083	0.000260273	WBGene00021261	0.000203263
WBGene00003884	0.000104902	WBGene00001094	0.000116832	WBGene00018649	0.000252085	WBGene00303030	0.000212523	WBGene00000402	0.000261016	WBGene00004745	0.00020618
WBGene00020010	0.000105256	WBGene00005886	0.00011844	WBGene00219411	0.000254249	WBGene00017594	0.000212651	WBGene00012162	0.000261064	WBGene00001991	0.00020658
WBGene00004265	0.000105446	WBGene00012310	0.000119737	WBGene00001713	0.000254598	WBGene00000453	0.000214424	WBGene00015229	0.000261075	WBGene00000137	0.0002071
WBGene00012011	0.000105576	WBGene00013483	0.00012035	WBGene00004700	0.000257416	WBGene00020328	0.000215774	WBGene00012477	0.000261572	WBGene00020594	0.000207613
WBGene00015634	0.000106189	WBGene00000937	0.000120689	WBGene00000732	0.000260529	WBGene00012324	0.000220328	WBGene00000235	0.000261694	WBGene00019020	0.000207629
WBGene00009113	0.000106592	WBGene00016215	0.000121634	WBGene00021336	0.000261348	WBGene00000378	0.00022168	WBGene00000716	0.000262354	WBGene00004424	0.0002089
WBGene00012328	0.000106866	WBGene00010056	0.000121739	WBGene00006077	0.000262595	WBGene00016202	0.000223766	WBGene00013713	0.000263176	WBGene00000550	0.000211234
WBGene00000669	0.000107882	WBGene00019660	0.000122874	WBGene00006448	0.000265766	WBGene00003062	0.000224007	WBGene00000670	0.000263321	WBGene00016365	0.000214065
WBGene00000882	0.000108264	WBGene00018640	0.00012565	WBGene00007778	0.000273571	WBGene00003591	0.000224585	WBGene00004061	0.000265588	WBGene00007793	0.000214493
WBGene00019940	0.00010852	WBGene00016732	0.000126111	WBGene00018786	0.000275833	WBGene00007169	0.000226213	WBGene00000207	0.00026582	WBGene00005837	0.000215276
WBGene00016731	0.000109858	WBGene00270321	0.00012619	WBGene00021449	0.000275958	WBGene00020297	0.000228045	WBGene00016800	0.0002675	WBGene00020672	0.00021529
WBGene00009143	0.000110112	WBGene00014120	0.000126279	WBGene00003430	0.000279823	WBGene00008434	0.000229994	WBGene00255731	0.000270371	WBGene00004782	0.000215519
WBGene00006085	0.000113492	WBGene00001564	0.000126643	WBGene00010636	0.00028157	WBGene00018261	0.000230642	WBGene00013388	0.000272097	WBGene00001488	0.000216397
WBGene00086558	0.000113701	WBGene00001546	0.000126644	WBGene00000882	0.000282738	WBGene00011338	0.000231181	WBGene00019796	0.000272522	WBGene00016440	0.000217218
WBGene00008541	0.00011393	WBGene00020550	0.000127031	WBGene00022603	0.000283245	WBGene00014168	0.000231207	WBGene00003745	0.0002747	WBGene00008039	0.000217679
WBGene00017947	0.000114639	WBGene00007463	0.000127572	WBGene00017685	0.000287006	WBGene00020576	0.000231778	WBGene00015220	0.000276198	WBGene00009221	0.000217916
WBGene00008472	0.000117012	WBGene00020128	0.000128202	WBGene00019688	0.000287799	WBGene00013235	0.000232761	WBGene00004339	0.000277055	WBGene00022767	0.000218476
WBGene00015128	0.000118053	WBGene00015264	0.000128892	WBGene00014826	0.000289952	WBGene00007917	0.00023409	WBGene00018761	0.000279005	WBGene00003728	0.000220295
WBGene00005934	0.000118272	WBGene00010648	0.000128922	WBGene00005951	0.000292613	WBGene00007564	0.000234939	WBGene00015285	0.000280955	WBGene00020092	0.000220305
WBGene00009501	0.00012043	WBGene00022257	0.000129101	WBGene00020626	0.0002927	WBGene00001700	0.000240633	WBGene00021128	0.000283806	WBGene00011624	0.000223194
WBGene00000609	0.000121119	WBGene00013575	0.000129928	WBGene00000676	0.000293124	WBGene00015150	0.000241784	WBGene00007952	0.000284251	WBGene00004123	0.000224835
WBGene00015463	0.000123687	WBGene00021168	0.000130111	WBGene00008684	0.000296758	WBGene00002033	0.00024269	WBGene00011858	0.000285495	WBGene00013528	0.000226244
WBGene00015630	0.000123751	WBGene00019966	0.000132697	WBGene00004945	0.000297404	WBGene00001085	0.000247257	WBGene00018446	0.000286857	WBGene00002264	0.000228513
WBGene00001545	0.000123873	WBGene00012463	0.000133725	WBGene00018261	0.000301349	WBGene00021482	0.000251954	WBGene00010324	0.000288749	WBGene00001102	0.000228664
WBGene00219318	0.000124819	WBGene00006093	0.000134718	WBGene00003405	0.000301938	WBGene00013107	0.00025329	WBGene00012182	0.000290761	WBGene00021303	0.000230006
WBGene00003845	0.000127546	WBGene00005826	0.000135304	WBGene00008683	0.000304723	WBGene00007944	0.000260044	WBGene00003620	0.00029092	WBGene00018294	0.00023163
WBGene00009926	0.000128618	WBGene00018805	0.000135729	WBGene00044310	0.000305862	WBGene00013215	0.000260294	WBGene00018288	0.000297074	WBGene00010758	0.000232604
WBGene00001543	0.000128783	WBGene00021087	0.000136603	WBGene00044580	0.000306421	WBGene00019563	0.000260911	WBGene00009583	0.000297323	WBGene00007178	0.000234036
WBGene00008235	0.000129153	WBGene00015099	0.000137675	WBGene00008035	0.000307626	WBGene00020420	0.000263688	WBGene00235359	0.000300167	WBGene00013055	0.000234928
WBGene00011277	0.000131488	WBGene00022439	0.000137937	WBGene00020071	0.000309639	WBGene00012946	0.000264418	WBGene00011303	0.000300584	WBGene00017640	0.000234929
WBGene00021589	0.00013375	WBGene00004303	0.000139397	WBGene00003920	0.000313284	WBGene00000697	0.000264508	WBGene00009435	0.000302339	WBGene00013920	0.000235369
WBGene00017798	0.000133819	WBGene00022679	0.000139633	WBGene00004429	0.000315769	WBGene00022070	0.000265516	WBGene00007684	0.000304588	WBGene00023418	0.000238101
WBGene00016155	0.000134007	WBGene00020592	0.000140009	WBGene00017631	0.00031678	WBGene00015778	0.000266337	WBGene00017125	0.000304996	WBGene00005401	0.000238509
WBGene00021448	0.000134326	WBGene00007088	0.000140053	WBGene00001227	0.000316899	WBGene00015326	0.000270666	WBGene00015358	0.000305026	WBGene00206518	0.000240478
WBGene00004927	0.000134693	WBGene00013276	0.000140217	WBGene00001580	0.000317435	WBGene00018357	0.000271422	WBGene00005773	0.000306292	WBGene00009867	0.000243465
WBGene00001284	0.000135347	WBGene00001736	0.00014089	WBGene00010067	0.000320063	WBGene00012343	0.000271861	WBGene00044205	0.000307961	WBGene00017978	0.00024429
WBGene00001552	0.000135502	WBGene00016565	0.000141838	WBGene00019567	0.000321059	WBGene00020030	0.000272559	WBGene00009867	0.000308323	WBGene00012491	0.000245142
WBGene00003992	0.000135504	WBGene00018543	0.000142141	WBGene00000675	0.000323578	WBGene00018933	0.000272611	WBGene00003527	0.000311076	WBGene00014013	0.000245307
WBGene00004217	0.000137449	WBGene00008742	0.000143796	WBGene00022073	0.00032372	WBGene00003701	0.000278772	WBGene00003410	0.000311168	WBGene00013901	0.000249475
WBGene00044149	0.000138822	WBGene00235363	0.000144602	WBGene00019544	0.000326415	WBGene00004955	0.000279122	WBGene00008475	0.00031958	WBGene00007240	0.000253914
WBGene00003242	0.000139678	WBGene00017402	0.000144643	WBGene00018744	0.000327394	WBGene00000585	0.000280108	WBGene00017944	0.00032058	WBGene00003783	0.000254069
WBGene00004755	0.000140405	WBGene00004104	0.000147844	WBGene00012868	0.000328184	WBGene00017923	0.000283326	WBGene00016061	0.000324602	WBGene00013798	0.000255744
WBGene00003528	0.000140614	WBGene00005386	0.000147882	WBGene00012134	0.000329466	WBGene00008683	0.000288031	WBGene00003835	0.000325404	WBGene00005106	0.000259329
WBGene00001734	0.000140974	WBGene00021098	0.000148387	WBGene00002054	0.000330144	WBGene00006914	0.000288945	WBGene00007249	0.000325617	WBGene00018496	0.000261124
WBGene00013849	0.000141482	WBGene00020702	0.000149044	WBGene00006550	0.000331459	WBGene00000785	0.000289679	WBGene00008825	0.000326545	WBGene00008512	0.000261212
WBGene00014813	0.00014239	WBGene00000418	0.000149104	WBGene00015629	0.000332212	WBGene00020113	0.000292622	WBGene00000280	0.000334479	WBGene00014246	0.000268521
WBGene00004337	0.000144664	WBGene00007833	0.000149257	WBGene00001999	0.000333727	WBGene00009685	0.00029393	WBGene00018268	0.000339433	WBGene00044512	0.000269295
WBGene00000219	0.000145539	WBGene00010124	0.000149508	WBGene00020440	0.000339253	WBGene00044325	0.000295667	WBGene00008427	0.000342069	WBGene00010056	0.000271453
WBGene00001102	0.000146312	WBGene00008535	0.000149648	WBGene00020508	0.000342251	WBGene00011738	0.000295784	WBGene00022614	0.000342779	WBGene00021448	0.000273094
WBGene00004037	0.000146319	WBGene00018872	0.000150713	WBGene00022398	0.000342671	WBGene00009773	0.000299906	WBGene00005093	0.000345659	WBGene00021415	0.000273376
WBGene00235287	0.000149421	WBGene00016085	0.000150808	WBGene00021518	0.00034448	WBGene00018635	0.000300987	WBGene00017590	0.000345947	WBGene00018948	0.00027514
WBGene00008950	0.000149496	WBGene00022307	0.000151572	WBGene00017819	0.00034699	WBGene00001527	0.000301015	WBGene00016200	0.000347243	WBGene00018018	0.000276469
WBGene00015310	0.000149998	WBGene00007305	0.000152281	WBGene00003591	0.000352021	WBGene00017015	0.000301034	WBGene00006754	0.000350247	WBGene00010848	0.000276907
WBGene00015481	0.000151418	WBGene00009926	0.000153005	WBGene00001493	0.000355226	WBGene00013049	0.000302634	WBGene00016246	0.000351171	WBGene00001058	0.000278408
WBGene00020046	0.000152002	WBGene00003522	0.000153233	WBGene00001714	0.000369044	WBGene00002114	0.000302681	WBGene00008411	0.000351954	WBGene00010735	0.000278705
WBGene00014114	0.000155325	WBGene00017923	0.000153791	WBGene00012436	0.000374285	WBGene00219324	0.00030378	WBGene00001869	0.000355798	WBGene00008541	0.000282094
WBGene00013855	0.000157922	WBGene00015856	0.000153837	WBGene00022500	0.000374739	WBGene00009500	0.00030566	WBGene00021011	0.000357238	WBGene00007890	0.000283991
WBGene00000276	0.000158884	WBGene00004768	0.000154244	WBGene00003661	0.000376098	WBGene00020231	0.00030789	WBGene00007111	0.000358936	WBGene00009813	0.000286123
WBGene00001337	0.000158972	WBGene00013090	0.00015567	WBGene00009297	0.000380423	WBGene00015854	0.000314355	WBGene00016085	0.000358941	WBGene00016740	0.000286833
WBGene00013055	0.000159265	WBGene00019216	0.000155791	WBGene00020700	0.000381626	WBGene00021736	0.000317135	WBGene00012777	0.000359293	WBGene00018134	0.000287113
WBGene00018497	0.000160069	WBGene00003426	0.000157457	WBGene00001581	0.0003832	WBGene00011087	0.000317907	WBGene00008114	0.000365301	WBGene00020379	0.000287477
WBGene00001530	0.000161236	WBGene00014054	0.000157502	WBGene00015739	0.000389297	WBGene00003450	0.000317947	WBGene00012159	0.000369827	WBGene00219278	0.000287537
WBGene00017406	0.000162092	WBGene00018635	0.000157826	WBGene00008783	0.000389746	WBGene00010254	0.000321563	WBGene00007152	0.000371112	WBGene00008066	0.000288488
WBGene00017183	0.000162377	WBGene00007802	0.000160732	WBGene00000717	0.00040085	WBGene00007787	0.000321631	WBGene00021873	0.000372225	WBGene00002246	0.000289942
WBGene00009867	0.00016382	WBGene00219411	0.000161789	WBGene00022245	0.000401813	WBGene00007920	0.000324757	WBGene00015905	0.000376762	WBGene00007257	0.000293969
WBGene00014965	0.000165245	WBGene00013302	0.000161871	WBGene00010123	0.000401954	WBGene00001119	0.00033321	WBGene00005975	0.000377502	WBGene00011375	0.00029447
WBGene00019840	0.000166027	WBGene00008092	0.000162273	WBGene00007195	0.000402078	WBGene00013157	0.000333513	WBGene00016759	0.000377992	WBGene00013157	0.000303474
WBGene00010757	0.000167107	WBGene00003925	0.000162495	WBGene00013487	0.000407387	WBGene00007587	0.000334185	WBGene00008652	0.000380462	WBGene00022340	0.000304106
WBGene00003499	0.000167601	WBGene00012491	0.000163249	WBGene00003406	0.000408338	WBGene00008627	0.000334506	WBGene00020587	0.000382634	WBGene00019509	0.000306902
WBGene00017571	0.000169724	WBGene00010247	0.000164231	WBGene00009117	0.000412972	WBGene00003586	0.000335439	WBGene00003948	0.000390135	WBGene00007235	0.000307029
WBGene00002226	0.000169878	WBGene00017808	0.00016528	WBGene00003995	0.000414858	WBGene00000610	0.000336608	WBGene00010052	0.000390333	WBGene00015237	0.000307857
WBGene00018021	0.000170054	WBGene00015754	0.000165899	WBGene00009773	0.000416965	WBGene00007672	0.000337211	WBGene00004319	0.000391294	WBGene00019246	0.000307973
WBGene00003090	0.000170517	WBGene00003003	0.000168418	WBGene00007305	0.000418267	WBGene00019574	0.000337307	WBGene00045382	0.000398097	WBGene00009514	0.000309335
WBGene00006692	0.000173652	WBGene00005349	0.00016886	WBGene00018348	0.000418589	WBGene00000715	0.000339716	WBGene00011473	0.000398538	WBGene00019233	0.000309817
WBGene00003151	0.000174381	WBGene00011371	0.000169663	WBGene00009201	0.000424769	WBGene00000482	0.000342416	WBGene00012075	0.000401121	WBGene00018060	0.000310325
WBGene00017791	0.000174926	WBGene00013757	0.000171034	WBGene00019841	0.000424873	WBGene00009123	0.000343378	WBGene00000874	0.000408328	WBGene00013562	0.000318184
WBGene00010157	0.000175064	WBGene00004392	0.0001717	WBGene00006914	0.000429335	WBGene00012518	0.000343454	WBGene00013192	0.000412559	WBGene00015342	0.000322547
WBGene00013528	0.00017517	WBGene00000666	0.000172711	WBGene00012205	0.000430626	WBGene00009334	0.000344647	WBGene00003699	0.000417041	WBGene00012979	0.000322655
WBGene00010043	0.000176044	WBGene00017004	0.000172717	WBGene00016957	0.000436702	WBGene00005776	0.000346023	WBGene00015642	0.000420091	WBGene00009401	0.000323311
WBGene00006894	0.000177525	WBGene00000712	0.000173158	WBGene00009539	0.000438529	WBGene00017698	0.000349259	WBGene00000485	0.000424142	WBGene00015587	0.000323542
WBGene00021751	0.000178732	WBGene00020598	0.000173249	WBGene00019154	0.000440994	WBGene00022398	0.000352737	WBGene00016453	0.000426446	WBGene00015366	0.000324494
WBGene00008817	0.00018124	WBGene00013266	0.000174546	WBGene00019840	0.000444262	WBGene00007866	0.000356686	WBGene00020260	0.000430045	WBGene00002153	0.000324629
WBGene00001869	0.000182931	WBGene00005256	0.000175572	WBGene00021887	0.000444416	WBGene00006449	0.000357922	WBGene00012554	0.000431573	WBGene00013855	0.000324646
WBGene00003605	0.000183381	WBGene00002115	0.000175912	WBGene00000903	0.000451807	WBGene00021837	0.000359223	WBGene00010206	0.000434504	WBGene00009084	0.000328659
WBGene00012128	0.000183734	WBGene00000485	0.000176232	WBGene00008449	0.000453525	WBGene00010267	0.000359829	WBGene00011076	0.000435856	WBGene00018235	0.000330863
WBGene00003068	0.000188097	WBGene00011239	0.000176359	WBGene00001603	0.000457205	WBGene00009515	0.000366666	WBGene00004244	0.000438369	WBGene00006093	0.000335489
WBGene00269388	0.00018944	WBGene00011548	0.000178209	WBGene00005425	0.000457622	WBGene00000680	0.000370182	WBGene00000705	0.000438941	WBGene00010265	0.000336215
WBGene00015367	0.000190859	WBGene00016660	0.000178336	WBGene00010524	0.000458367	WBGene00009193	0.000370407	WBGene00017441	0.000447163	WBGene00015226	0.000338957
WBGene00011990	0.000191066	WBGene00016429	0.000178765	WBGene00015547	0.000459693	WBGene00009247	0.000373195	WBGene00009178	0.000459714	WBGene00002229	0.000340436
WBGene00007732	0.000192064	WBGene00022431	0.000180271	WBGene00009233	0.000463048	WBGene00021112	0.000376931	WBGene00003578	0.000461236	WBGene00003637	0.00034059
WBGene00022780	0.000192095	WBGene00000830	0.00018038	WBGene00044674	0.000466369	WBGene00016220	0.000382455	WBGene00006935	0.000461327	WBGene00011713	0.000341498
WBGene00007384	0.000192502	WBGene00013117	0.000180762	WBGene00018223	0.000470899	WBGene00014127	0.000386356	WBGene00015255	0.000461463	WBGene00005142	0.000351809
WBGene00000741	0.000192978	WBGene00003507	0.000180795	WBGene00000696	0.000474732	WBGene00009993	0.000389097	WBGene00010567	0.000463064	WBGene00007697	0.000353384
[truncated: 19,504 more rows]
[truncated: 2 more columns]

## Sheet: S3-Tissue-enriched genes
Supplementary table 4, Sheet 3. Tissue-enriched genes (genes significantly enriched in at least one biological replica of each tissue).
[truncated: 4,987 more rows]

[truncated: 3 more sheets: S4-Tissue-enriched genes bothRe, S5-Tissue spec genes per tissue, S6-Summary table]
